# Supplementary material for: Antiviral function and viral antagonism of the rapidly evolving dynein activating adaptor NINL
Source: eLife. 2022 Oct 12;11:e81606. doi: 10.7554/eLife.81606 (PMC9651953; doi:10.7554/eLife.81606)
Supplement: Figure 2—figure supplement 2—source data 1. [file elife-81606-fig2-figsupp2-data1.xlsx]

## Sheet: Subfigure A
Figure 2, Supplemental 2, Subfigure A: A549 infection with SinV
SinV
A549	A549+IFNα	NINL-KO	NINL-KO+IFNα	NIN-KO	NIN-KO+IFNα
5.60206	4	7.47712	7.11394	5.47712	4.04139
5.95424	3.77815	7.95424	6.47712	5.8451	4
5.60206	3.95424	7.60206	7.04139	5.77815	4.11394
Values displayed are PFU/mL (log10)
Statistics:
2-way ANOVA (Alpha = 0.05)
Tukey's multiple comparisons test	Mean Diff.	95.00% CI of diff.	Below threshold?	Summary	Adjusted P Value
A549 vs. A549+IFNα	1.809	1.146 to 2.471	Yes	****	<0.0001
NINL-KO vs. NINL-KO+IFNα	0.8003	0.1378 to 1.463	Yes	*	0.0168
NIN-KO vs. NIN-KO+IFNα	1.648	0.9858 to 2.311	Yes	****	<0.0001

## Sheet: Subfigure B
Figure 2, Supplemental 2, Subfigure B: U2OS infection with SinV
SinV
U2OS	U2OS+IFNα	NINL-KO	NINL-KO+IFNα
7.69897	4.60206	7.69897	6
7.69897	4.30103	7.36173	5.14613
7.30103	4.47712	7.50515	5
Values displayed are PFU/mL (log10)
Statistics:
2-way ANOVA (Alpha = 0.05)
Tukey's multiple comparisons test	Mean Diff.	95.00% CI of diff.	Below threshold?	Summary	Adjusted P Value
U2OS vs. U2OS+IFNα	3.106	2.417 to 3.795	Yes	****	<0.0001
NINL-KO vs. NINL-KO+IFNα	2.14	1.451 to 2.829	Yes	***	0.0002
Grouped 2-way ANOVA
Source of Variation	% of total variation	P value	P value summary	Significant?
Interaction	3.084	0.0288	*	Yes
IFN	90.89	<0.0001	****	Yes
Cell Line	2.543	0.0422	*	Yes
ANOVA table	SS	DF	MS	F (DFn, DFd)	P value
Interaction	0.7004	1	0.7004	F (1, 8) = 7.074	P=0.0288
IFN	20.64	1	20.64	F (1, 8) = 208.5	P<0.0001
Cell Line	0.5776	1	0.5776	F (1, 8) = 5.834	P=0.0422
Residual	0.7921	8	0.09901

## Sheet: Subfigure C
Figure 2, Supplemental 2, Subfigure C: A549 infection with CVB3
CVB3
A549	A549+IFNα	NINL-KO	NINL-KO+IFNα	NIN-KO	NIN-KO+IFNα
4.24304	3.65321	7.47712	7	4.69897	4.60206
4.30103	3.60206	7.54407	7.30103	4.30103	4.17609
4.60206	3.77815	7.39794	7.17609	4.47712	4
Values displayed are PFU/mL (log10)
Statistics:
2-way ANOVA (Alpha = 0.05)
Tukey's multiple comparisons test	Mean Diff.	95.00% CI of diff.	Below threshold?	Summary	Adjusted P Value
A549 vs. A549+IFNα	0.7042	0.1360 to 1.272	Yes	*	0.0143
NINL-KO vs. NINL-KO+IFNα	0.314	-0.2542 to 0.8822	No	ns	0.4437
NIN-KO vs. NIN-KO+IFNα	0.233	-0.3352 to 0.8012	No	ns	0.7138

## Sheet: Subfigure D
Figure 2, Supplemental 2, Subfigure D: U2OS infection with CVB3
CVB3
U2OS	U2OS+IFNα	NINL-KO	NINL-KO+IFNα
5.8451	5.25527	6.77815	6.60206
5.90309	5.11394	6.47712	7.14613
5.8451	5.41497	6.8921	7
Values displayed are PFU/mL (log10)
Statistics:
2-way ANOVA (Alpha = 0.05)
Tukey's multiple comparisons test	Mean Diff.	95.00% CI of diff.	Below threshold?	Summary	Adjusted P Value
U2OS vs. U2OS+IFNα	0.603	0.04179 to 1.164	Yes	*	0.0373
NINL-KO vs. NINL-KO+IFNα	-0.2003	-0.7615 to 0.3610	No	ns	0.6296
Grouped 2-way ANOVA
Source of Variation	% of total variation	P value	P value summary	Significant?
Interaction	8.621	0.0069	**	Yes
IFN	2.167	0.1084	ns	No
Cell Line	83.9	<0.0001	****	Yes
ANOVA table	SS	DF	MS	F (DFn, DFd)	P value
Interaction	0.484	1	0.484	F (1, 8) = 12.99	P=0.0069
IFN	0.1217	1	0.1217	F (1, 8) = 3.265	P=0.1084
Cell Line	4.71	1	4.71	F (1, 8) = 126.4	P<0.0001
Residual	0.2981	8	0.03726
