# Supplementary material for: Antiviral function and viral antagonism of the rapidly evolving dynein activating adaptor NINL
Source: eLife. 2022 Oct 12;11:e81606. doi: 10.7554/eLife.81606 (PMC9651953; doi:10.7554/eLife.81606)
Supplement: Figure 2—source data 2. [file elife-81606-fig2-data2.xlsx]

## Sheet: Subfigure B
Figure 2, Subfigure B: A549 infection with VSV
VSV (plaque forming units per mL)
A549	A549+IFNα	NINL-KO	NINL-KO+IFNα	NIN-KO	NIN-KO+IFNα
14000000	8000	120000000	26000000	8000000	40000
7000000	18000	100000000	20000000	3200000	80000
18000000	22000	60000000	14000000	6000000	40000
VSV (log10 values)
A549	A549+IFNα	NINL-KO	NINL-KO+IFNα	NIN-KO	NIN-KO+IFNα
7.14613	3.90309	8.07918	7.41497	6.90309	4.60206
6.8451	4.25527	8	7.30103	6.50515	4.90309
7.25527	4.34242	7.77815	7.14613	6.77815	4.60206
Statistics:
2-way ANOVA (Alpha = 0.05)
Tukey's multiple comparisons test	Mean Diff.	95.00% CI of diff.	Below threshold?	Summary	Adjusted P Value
A549 vs. A549+IFNα	2.915	2.333 to 3.498	Yes	****	<0.0001
NINL-KO vs. NINL-KO+IFNα	0.6651	0.08249 to 1.248	Yes	*	0.0237
NIN-KO vs. NIN-KO+IFNα	2.026	1.444 to 2.609	Yes	****	<0.0001
Grouped 2-way ANOVA
Source of Variation	% of total variation	P value	P value summary	Significant?
Interaction	14.81	<0.0001	****	Yes
IFN	37.5	<0.0001	****	Yes
Cell Line	46.59	<0.0001	****	Yes
ANOVA table	SS	DF	MS	F (DFn, DFd)	P value
Interaction	3.797	1	3.797	F (1, 8) = 107.1	P<0.0001
IFN	9.614	1	9.614	F (1, 8) = 271.2	P<0.0001
Cell Line	11.94	1	11.94	F (1, 8) = 336.9	P<0.0001
Residual	0.2836	8	0.03545

## Sheet: Subfigure C
Figure 2, Subfigure C: U2OS infection with VSV
VSV (plaque forming units per mL)
U2OS	U2OS+IFNα	NINL-KO	NINL-KO+IFNα
400000	14000	4000000	3000000
200000	18000	4000000	2100000
200000	17000	11000000	2800000
VSV (log10 values)
U2OS	U2OS+IFNα	NINL-KO	NINL-KO+IFNα
5.60206	4.14613	6.60206	6.47712
5.30103	4.25527	6.60206	6.32222
5.30103	4.23045	7.04139	6.44716
Statistics:
2-way ANOVA (Alpha = 0.05)
Tukey's multiple comparisons test	Mean Diff.	95.00% CI of diff.	Below threshold?	Summary	Adjusted P Value
U2OS vs. U2OS+IFNα	1.191	0.7125 to 1.669	Yes	***	0.0006
NINL-KO vs. NINL-KO+IFNα	0.333	-0.1452 to 0.8112	No	ns	0.1751
Grouped 2-way ANOVA
Source of Variation	% of total variation	P value	P value summary	Significant?
Interaction	4.612	0.0018	**	Yes
IFN	14.55	<0.0001	****	Yes
Cell Line	79.09	<0.0001	****	Yes
ANOVA table	SS	DF	MS	F (DFn, DFd)	P value
Interaction	0.5518	1	0.5518	F (1, 8) = 21.11	P=0.0018
IFN	1.741	1	1.741	F (1, 8) = 66.61	P<0.0001
Cell Line	9.463	1	9.463	F (1, 8) = 362.0	P<0.0001
Residual	0.2091	8	0.02614

## Sheet: Subfigure D
Figure 2, Subfigure D: A549 infection with SinV and CVB3
SinV (plaque forming units per mL)								CVB3 (plaque forming units per mL)
A549	A549+IFNα	NINL-KO	NINL-KO+IFNα					A549	A549+IFNα	NINL-KO	NINL-KO+IFNα
400000	10000	30000000	13000000					17500	4500	30000000	10000000
900000	6000	90000000	3000000					20000	4000	35000000	20000000
400000	9000	40000000	11000000					40000	6000	25000000	15000000
SinV (log10 values)								CVB3 (log10 values)
A549	A549+IFNα	NINL-KO	NINL-KO+IFNα					A549	A549+IFNα	NINL-KO	NINL-KO+IFNα
5.60206	4	7.47712	7.11394					4.24304	3.65321	7.47712	7
5.95424	3.77815	7.95424	6.47712					4.30103	3.60206	7.54407	7.30103
5.60206	3.95424	7.60206	7.04139					4.60206	3.77815	7.39794	7.17609
Statistics:								Statistics:
2-way ANOVA (Alpha = 0.05)								2-way ANOVA (Alpha = 0.05)
Tukey's multiple comparisons test	Mean Diff.	95.00% CI of diff.	Below threshold?	Summary	Adjusted P Value			Tukey's multiple comparisons test	Mean Diff.	95.00% CI of diff.	Below threshold?	Summary	Adjusted P Value
A549 vs. A549+IFNα	1.809	1.146 to 2.471	Yes	****	<0.0001			A549 vs. A549+IFNα	0.7042	0.1360 to 1.272	Yes	*	0.0143
NINL-KO vs. NINL-KO+IFNα	0.8003	0.1378 to 1.463	Yes	*	0.0168			NINL-KO vs. NINL-KO+IFNα	0.314	-0.2542 to 0.8822	No	ns	0.4437
NIN-KO vs. NIN-KO+IFNα	1.648	0.9858 to 2.311	Yes	****	<0.0001			NIN-KO vs. NIN-KO+IFNα	0.233	-0.3352 to 0.8012	No	ns	0.7138
Grouped 2-way ANOVA								Grouped 2-way ANOVA
Source of Variation	% of total variation	P value	P value summary	Significant?				Source of Variation	% of total variation	P value	P value summary	Significant?
Interaction	3.108	0.0072	**	Yes				Interaction	0.3416	0.0374	*	Yes
IFN	20.81	<0.0001	****	Yes				IFN	2.326	0.0002	***	Yes
Cell Line	74.15	<0.0001	****	Yes				Cell Line	96.89	<0.0001	****	Yes
ANOVA table	SS	DF	MS	F (DFn, DFd)	P value			ANOVA table	SS	DF	MS	F (DFn, DFd)	P value
Interaction	0.7626	1	0.7626	F (1, 8) = 12.83	P=0.0072			Interaction	0.1142	1	0.1142	F (1, 8) = 6.209	P=0.0374
IFN	5.105	1	5.105	F (1, 8) = 85.87	P<0.0001			IFN	0.7776	1	0.7776	F (1, 8) = 42.28	P=0.0002
Cell Line	18.19	1	18.19	F (1, 8) = 306.0	P<0.0001			Cell Line	32.4	1	32.4	F (1, 8) = 1761	P<0.0001
Residual	0.4756	8	0.05945					Residual	0.1472	8	0.01839
