# Supplementary material for: Antiviral function and viral antagonism of the rapidly evolving dynein activating adaptor NINL
Source: eLife. 2022 Oct 12;11:e81606. doi: 10.7554/eLife.81606 (PMC9651953; doi:10.7554/eLife.81606)
Supplement: Figure 3—figure supplement 5—source data 1. [file elife-81606-fig3-figsupp5-data1.xlsx]

## Sheet: Subfigure A
Figure 3, Figure Supplement 5, Subfigure A: A549 NIN KO infection with VacV WT and VacV J3
VacV WT			VacV J3
A549 NIN KO	A549 NIN KO+IFNα		A549 NIN KO	A549 NIN KO+IFNα
5.60206	5.77815		5.95424	4.95424
5.77815	5.60206		5.90309	4.95424
5.60206	6		5.77815	4.90309
Values displayed are PFU/mL (log10)
Statistics:
2-way ANOVA (Alpha = 0.05)
Tukey's multiple comparisons test	Mean Diff.	95.00% CI of diff.	Below threshold?	Summary	Adjusted P Value
NIN-KO VacV WT vs. NIN-KO VacV WT+IFNα	-0.1326	-0.6768 to 0.4115	No	ns	0.9511
NIN-KO VacV J3 vs. NIN-KO VacV J3+IFNα	0.9413	0.3421 to 1.540	Yes	**	0.0028
Grouped 2-way ANOVA
Source of Variation	% of total variation	P value	P value summary	Significant?
Interaction	48.61	<0.0001	****	Yes
IFN	27.56	0.0004	***	Yes
Virus	17.18	0.0019	**	Yes
ANOVA table	SS	DF	MS	F (DFn, DFd)	P value
Interaction	0.865	1	0.865	F (1, 8) = 58.47	P<0.0001
IFN	0.4904	1	0.4904	F (1, 8) = 33.15	P=0.0004
Virus	0.3057	1	0.3057	F (1, 8) = 20.67	P=0.0019
Residual	0.1184	8	0.01479

## Sheet: Subfigure B
Figure 3, Figure Supplement 5, Subfigure B: U2-OS infection with VacV WT and VacV J3
VacV WT			VacV J3
U2-OS	U2-OS+IFNα		U2-OS	U2-OS+IFNα
4.44716	3.77815		5.14613	3.30103
3.95424	3.90309		5.27875	3
4.17609	3.8451		4.90309	3.47712
Values displayed are PFU/mL (log10)
Statistics:
2-way ANOVA (Alpha = 0.05)
Tukey's multiple comparisons test	Mean Diff.	95.00% CI of diff.	Below threshold?	Summary	Adjusted P Value
U2-OS VacV WT vs. U2-OS VacV WT+IFNα	0.3504	-0.1526 to 0.8534	No	ns	0.1749
U2-OS VacV J3 vs. U2-OS VacV J3+IFNα	1.85	1.316 to 2.383	Yes	****	<0.0001
Grouped 2-way ANOVA
Source of Variation	% of total variation	P value	P value summary	Significant?
Interaction	29.48	0.0002	***	Yes
IFN	63.48	<0.0001	****	Yes
Virus	1.464	0.1852	ns	No
ANOVA table	SS	DF	MS	F (DFn, DFd)	P value
Interaction	1.687	1	1.687	F (1, 8) = 42.33	P=0.0002
IFN	3.631	1	3.631	F (1, 8) = 91.14	P<0.0001
Virus	0.08372	1	0.08372	F (1, 8) = 2.101	P=0.1852
Residual	0.3187	8	0.03984

## Sheet: Subfigure C
Figure 3, Figure Supplement 5, Subfigure C: U2-OS NINL KO infection with VacV WT and VacV J3
VacV WT			VacV J3
U2-OS NINL KO	U2-OS NINL KO+IFNα		U2-OS NINL KO	U2-OS NINL KO+IFNα
5.77815	5.30103		5	4.69897
5.69897	5.43136		4.69897	4.60206
5.70757	5.69897		4.77815	4.47712
Values displayed are PFU/mL (log10)
Statistics:
2-way ANOVA (Alpha = 0.05)
Tukey's multiple comparisons test	Mean Diff.	95.00% CI of diff.	Below threshold?	Summary	Adjusted P Value
U2-OS NINL KO VacV WT vs. U2-OS NINL KO VacV WT+IFNα	0.2511	-0.2519 to 0.7541	No	ns	0.3873
U2-OS NINL KO VacV J3 vs. U2-OS NINL KO VacV J3+IFNα	0.233	-0.3005 to 0.7665	No	ns	0.4861
Grouped 2-way ANOVA
Source of Variation	% of total variation	P value	P value summary	Significant?
Interaction	0.009018	0.9143	ns	No
IFN	6.437	0.0179	*	Yes
Virus	87.71	<0.0001	****	Yes
ANOVA table	SS	DF	MS	F (DFn, DFd)	P value
Interaction	0.0002462	1	0.0002462	F (1, 8) = 0.01235	P=0.9143
IFN	0.1758	1	0.1758	F (1, 8) = 8.814	P=0.0179
Virus	2.395	1	2.395	F (1, 8) = 120.1	P<0.0001
Residual	0.1595	8	0.01994
