# Supplementary material for: Antiviral function and viral antagonism of the rapidly evolving dynein activating adaptor NINL
Source: eLife. 2022 Oct 12;11:e81606. doi: 10.7554/eLife.81606 (PMC9651953; doi:10.7554/eLife.81606)
Supplement: Figure 3—source data 2. [file elife-81606-fig3-data2.xlsx]

## Sheet: Subfigure C
Figure 3, Subfigure C: A549 infection with VacV WT and VacV J3
VacV WT			VacV J3
A549	A549+IFNα		A549	A549+IFNα
6.47712	6.04139		6.41497	3.77815
6.47712	6.23045		6.23045	3.90309
6	6.17609		6.25527	4.23045
Values displayed are PFU/mL (log10)
Statistics:
2-way ANOVA (Alpha = 0.05)
Tukey's multiple comparisons test	Mean Diff.	95.00% CI of diff.	Below threshold?	Summary	Adjusted P Value
A549 VacV WT vs. A549 VacV WT+IFNα	0.1688	-0.3754 to 0.7129	No	ns	0.8797
A549 VacV J3 vs. A549 VacV J3+IFNα	2.33	1.730 to 2.929	Yes	****	<0.0001
Grouped 2-way ANOVA
Source of Variation	% of total variation	P value	P value summary	Significant?
Interaction	28.94	<0.0001	****	Yes
IFN	38.68	<0.0001	****	Yes
Virus	29.9	<0.0001	****	Yes
ANOVA table	SS	DF	MS	F (DFn, DFd)	P value
Interaction	3.502	1	3.502	F (1, 8) = 93.43	P<0.0001
IFN	4.682	1	4.682	F (1, 8) = 124.9	P<0.0001
Virus	3.619	1	3.619	F (1, 8) = 96.54	P<0.0001
Residual	0.2999	8	0.03749

## Sheet: Subfigure D
Figure 3, Subfigure D: A549 NINL KO infection with VacV WT and VacV J3
VacV WT			VacV J3
A549 NINL KO	A549 NINL KO+IFNα		A549 NINL KO	A549 NINL KO+IFNα
4.47712	4.30103		5.32222	4.77815
4.30103	4.47712		4.8451	4.60206
4.30103	4.69897		4.60206	5
Values displayed are PFU/mL (log10)
Statistics:
2-way ANOVA (Alpha = 0.05)
Tukey's multiple comparisons test	Mean Diff.	95.00% CI of diff.	Below threshold?	Summary	Adjusted P Value
NINL-KO VacV WT vs. NINL-KO VacV WT+IFNα	-0.1326	-0.6768 to 0.4115	No	ns	0.9511
NINL-KO VacV J3 vs. NINL-KO VacV J3+IFNα	0.1297	-0.4694 to 0.7289	No	ns	0.9698
Grouped 2-way ANOVA
Source of Variation	% of total variation	P value	P value summary	Significant?
Interaction	4.869	0.3652	ns	No
IFN	0.0006051	0.9917	ns	No
Virus	52.86	0.0133	*	Yes
ANOVA table	SS	DF	MS	F (DFn, DFd)	P value
Interaction	0.05163	1	0.05163	F (1, 8) = 0.9216	P=0.3652
IFN	6.415e-06	1	6.415e-06	F (1, 8) = 0.0001145	P=0.9917
Virus	0.5604	1	0.5604	F (1, 8) = 10.00	P=0.0133
Residual	0.4482	8	0.05602
