# Supplementary material for: Antiviral function and viral antagonism of the rapidly evolving dynein activating adaptor NINL
Source: eLife. 2022 Oct 12;11:e81606. doi: 10.7554/eLife.81606 (PMC9651953; doi:10.7554/eLife.81606)
Supplement: Figure 4—figure supplement 1—source data 1. [file elife-81606-fig4-figsupp1-data1.xlsx]

## Sheet: A549 Wildtype
	Average Nuclear Intensity	Average Cytoplasmic Intensity
A549_220_ No IFN_Set1_01	19.1823	25.0263
A549_220_ No IFN_Set1_02	22.2997	29.8017
A549_220_ No IFN_Set1_03	22.1236	35.5892
A549_220_ No IFN_Set1_04	23.6087	29.412
A549_220_ No IFN_Set1_05	21.9678	28.0222
A549_220_ No IFN_Set1_06	25.9805	30.1952
A549_220_ No IFN_Set1_07	30.6761	36.6469
A549_220_ No IFN_Set1_08	26.2219	36.7711
A549_220_ No IFN_Set1_09	26.8902	29.3822
A549_220_ No IFN_Set1_10	20.8616	22.9967
A549_220_ No IFN_Set2_01	22.1987	27.8348
A549_220_ No IFN_Set2_02	24.6896	28.3286
A549_220_ No IFN_Set2_03	22.8879	25.8896
A549_220_ No IFN_Set2_04	20.8436	24.4111
A549_220_ No IFN_Set2_05	25.8965	30.8527
A549_220_ No IFN_Set2_06	29.9249	35.8499
A549_220_ No IFN_Set2_07	25.8313	31.7473
A549_220_ No IFN_Set2_08	29.592	35.7849
A549_220_ No IFN_Set2_09	30.2328	36.426
A549_220_ No IFN_Set2_10	52.3838	51.7386
A549_220_ No IFN_Set3_01	31.4376	37.1505
A549_220_ No IFN_Set3_02	32.5229	39.9551
A549_220_ No IFN_Set3_03	31.9376	36.5832
A549_220_ No IFN_Set3_04	31.6827	37.3894
A549_220_ No IFN_Set3_05	37.9167	43.6428
A549_220_ No IFN_Set3_06	33.4611	38.6937
A549_220_ No IFN_Set3_07	33.8531	39.0887
A549_220_ No IFN_Set3_08	38.4456	42.1163
A549_220_ No IFN_Set3_09	34.3667	39.4879
A549_220_ No IFN_Set3_10	39.0013	42.5638
	Average Nuclear Intensity	Average Cytoplasmic Intensity
A549_220_IFN_Set1_01	293.285	50.1924
A549_220_IFN_Set1_02	373.339	85.0967
A549_220_IFN_Set1_03	366.001	54.2554
A549_220_IFN_Set1_04	227.667	38.6423
A549_220_IFN_Set1_05	223.036	37.6301
A549_220_IFN_Set1_06	248.508	41.1434
A549_220_IFN_Set1_07	301.359	55.4708
A549_220_IFN_Set1_08	696.179	223.127
A549_220_IFN_Set1_09	233.146	33.4415
A549_220_IFN_Set1_10	424.54	109.895
A549_220_IFN_Set2_01	284.02	72.9541
A549_220_IFN_Set2_02	213.484	57.4658
A549_220_IFN_Set2_03	275.167	67.0247
A549_220_IFN_Set2_04	350.737	63.854
A549_220_IFN_Set2_05	479.671	102.271
A549_220_IFN_Set2_06	263.85	41.193
A549_220_IFN_Set2_07	316.481	62.8294
A549_220_IFN_Set2_08	304.117	76.3851
A549_220_IFN_Set2_09	260.357	64.3631
A549_220_IFN_Set2_10	264.093	68.9339
A549_220_IFN_Set3_01	511.195	201.205
A549_220_IFN_Set3_02	528.521	76.8521
A549_220_IFN_Set3_03	394.048	135.415
A549_220_IFN_Set3_04	447.764	79.7151
A549_220_IFN_Set3_05	525.48	107.359
A549_220_IFN_Set3_06	674.359	130.01
A549_220_IFN_Set3_07	516.639	87.5012
A549_220_IFN_Set3_08	579.146	136.295
A549_220_IFN_Set3_09	201.922	36.8763
A549_220_IFN_Set3_10	517.073	130.129

## Sheet: A549 NINL KO
	Average Nuclear Intensity	Average Cytoplasmic Intensity
A549_252_No IFN_Set1_01	29.7095	33.0057
A549_252_No IFN_Set1_02	27.6485	30.8108
A549_252_No IFN_Set1_03	25.5931	27.4414
A549_252_No IFN_Set1_04	25.9999	29.5114
A549_252_No IFN_Set1_05	29.363	31.7665
A549_252_No IFN_Set1_06	27.3745	28.4774
A549_252_No IFN_Set1_07	24.401	27.169
A549_252_No IFN_Set1_08	28.6765	32.0549
A549_252_No IFN_Set1_09	25.0869	28.7482
A549_252_No IFN_Set1_10	30.4693	29.856
A549_252_ No IFN_Set2_01	22.471	27.3699
A549_252_ No IFN_Set2_02	19.601	24.2281
A549_252_ No IFN_Set2_03	23.3596	29.7205
A549_252_ No IFN_Set2_04	21.1049	23.612
A549_252_ No IFN_Set2_05	19.912	23.5007
A549_252_ No IFN_Set2_06	24.0127	36.1796
A549_252_ No IFN_Set2_07	25.5771	30.8833
A549_252_ No IFN_Set2_08	24.299	31.4853
A549_252_ No IFN_Set2_09	30.6723	37.8784
A549_252_ No IFN_Set2_10	25.6593	32.9138
A549_252_ No IFN_Set3_01	36.9736	37.7797
A549_252_ No IFN_Set3_02	35.0948	37.5125
A549_252_ No IFN_Set3_03	36.0522	40.5652
A549_252_ No IFN_Set3_04	32.5279	36.9066
A549_252_ No IFN_Set3_05	34.8935	38.6457
A549_252_ No IFN_Set3_06	30.6702	33.9541
A549_252_ No IFN_Set3_07	34.7107	38.2285
A549_252_ No IFN_Set3_08	34.4935	36.3139
A549_252_ No IFN_Set3_09	38.4265	45.6947
A549_252_ No IFN_Set3_10	37.3399	41.7404
	Average Nuclear Intensity	Average Cytoplasmic Intensity
A549_252_IFN_Set1_01	212.393	49.1901
A549_252_IFN_Set1_02	327.1	177.712
A549_252_IFN_Set1_03	297.115	78.3173
A549_252_IFN_Set1_04	290.333	224.255
A549_252_IFN_Set1_05	299.853	189.087
A549_252_IFN_Set1_06	226.869	83.4998
A549_252_IFN_Set1_07	337.426	182.98
A549_252_IFN_Set1_08	330.078	174.478
A549_252_IFN_Set1_09	279.422	103.248
A549_252_IFN_Set1_10	315.146	165.829
A549_252_IFN_Set2_01	247.987	149.283
A549_252_IFN_Set2_02	251.863	83.5662
A549_252_IFN_Set2_03	153.645	38.2669
A549_252_IFN_Set2_04	92.8049	35.3096
A549_252_IFN_Set2_05	218.635	70.3627
A549_252_IFN_Set2_06	107.44	38.4201
A549_252_IFN_Set2_07	119.291	38.1979
A549_252_IFN_Set2_08	145.944	72.6587
A549_252_IFN_Set2_09	152.972	62.7012
A549_252_IFN_Set2_10	185.238	93.8824
A549_252_IFN_Set3_01	178.967	76.3158
A549_252_IFN_Set3_02	212.501	63.2131
A549_252_IFN_Set3_03	240.332	99.6454
A549_252_IFN_Set3_04	292.234	92.2162
A549_252_IFN_Set3_05	324.008	63.4857
A549_252_IFN_Set3_06	258.326	61.8334
A549_252_IFN_Set3_07	295.306	100.509
A549_252_IFN_Set3_08	327.424	74.3577
A549_252_IFN_Set3_09	178.018	65.2809
A549_252_IFN_Set3_10	260.124	51.9009

## Sheet: A549 NIN KO
	Average Nuclear Intensity	Average Cytoplasmic Intensity
A549_298_No IFN_Set1_01	21.9558	26.7475
A549_298_No IFN_Set1_02	24.8772	29.2839
A549_298_No IFN_Set1_03	24.0376	28.7063
A549_298_No IFN_Set1_04	25.8044	29.6308
A549_298_No IFN_Set1_05	26.4124	29.5003
A549_298_No IFN_Set1_06	22.3425	31.5176
A549_298_No IFN_Set1_07	20.7178	24.5522
A549_298_No IFN_Set1_08	19.2293	22.1651
A549_298_No IFN_Set1_09	22.2909	27.3344
A549_298_No IFN_Set1_10	19.955	24.6475
A549_298_ No IFN_Set2_01	26.8463	39.3438
A549_298_ No IFN_Set2_02	25.4477	39.6243
A549_298_ No IFN_Set2_03	24.0343	34.8888
A549_298_ No IFN_Set2_04	24.3387	29.2146
A549_298_ No IFN_Set2_05	28.5084	33.7021
A549_298_ No IFN_Set2_06	24.9258	32.238
A549_298_ No IFN_Set2_07	27.355	35.0472
A549_298_ No IFN_Set2_08	25.8241	40.9275
A549_298_ No IFN_Set2_09	23.6947	28.7277
A549_298_ No IFN_Set2_10	22.4113	34.4192
A549_298_ No IFN_Set3_01	30.884	36.0669
A549_298_ No IFN_Set3_02	41.5001	45.2285
A549_298_ No IFN_Set3_03	40.3255	43.0159
A549_298_ No IFN_Set3_04	38.8705	44.0991
A549_298_ No IFN_Set3_05	35.3249	40.8171
A549_298_ No IFN_Set3_06	36.8182	41.8217
A549_298_ No IFN_Set3_07	38.9854	42.8322
A549_298_ No IFN_Set3_08	35.4373	42.0131
A549_298_ No IFN_Set3_09	29.7097	32.5405
A549_298_ No IFN_Set3_10	33.8605	38.907
	Average Nuclear Intensity	Average Cytoplasmic Intensity
A549_298_IFN_Set1_01	336.248	86.6108
A549_298_IFN_Set1_02	306.09	68.2063
A549_298_IFN_Set1_03	393.792	101.693
A549_298_IFN_Set1_04	478.467	53.0238
A549_298_IFN_Set1_05	405.44	120.446
A549_298_IFN_Set1_06	261.938	68.0453
A549_298_IFN_Set1_07	366.292	96.4435
A549_298_IFN_Set1_08	341.004	86.2174
A549_298_IFN_Set1_09	331.033	92.2265
A549_298_IFN_Set1_10	298.361	40.544
A549_298_ IFN_Set2_01	336.366	67.7502
A549_298_IFN_Set2_02	630.955	113.126
A549_298_ IFN_Set2_03	317.477	81.1161
A549_298_ IFN_Set2_04	491.708	146.373
A549_298_ IFN_Set2_05	299.2	69.2889
A549_298_ IFN_Set2_06	312.789	55.9433
A549_298_ IFN_Set2_07	404.009	235.635
A549_298_ IFN_Set2_08	309.694	84.6721
A549_298_ IFN_Set2_09	323.337	96.6672
A549_298_ IFN_Set2_10	437.927	148.669
A549_298_ IFN_Set3_01	308.897	32.1727
A549_298_IFN_Set3_02	520.584	110.324
A549_298_IFN_Set3_03	585.821	177.24
A549_298_IFN_Set3_04	567.728	99.6129
A549_298_IFN_Set3_05	397.722	58.7344
A549_298_IFN_Set3_06	286.217	61.8966
A549_298_IFN_Set3_07	671.994	161.161
A549_298_IFN_Set3_08	448.15	159.286
A549_298_IFN_Set3_09	504.151	130.703
A549_298_IFN_Set3_10	538.27	115.216
