# Supplementary material for: Antiviral function and viral antagonism of the rapidly evolving dynein activating adaptor NINL
Source: eLife. 2022 Oct 12;11:e81606. doi: 10.7554/eLife.81606 (PMC9651953; doi:10.7554/eLife.81606)
Supplement: Figure 4—source data 1. [file elife-81606-fig4-data1.xlsx]

## Sheet: A549 Wildtype
	Total pSTAT1	Total Area Measured	Nuclear pSTAT1	Total Nuclear Area	Average Nuclear Intensity	Cytoplasmic pSTAT1	Total Cytoplasmic Area	Average Cytoplasmic Intensity	Nuclear/Cytoplasmic Ratio
A549_220_ No IFN_Set1_01	9.45889e+07	3.99842e+06	1.79768e+07	937156	19.1823	7.6612e+07	3.06126e+06	25.0263	0.766484
A549_220_ No IFN_Set1_02	1.28543e+08	4.65307e+06	3.01001e+07	1.3498e+06	22.2997	9.84429e+07	3.30327e+06	29.8017	0.74827
A549_220_ No IFN_Set1_03	1.35902e+08	4.25652e+06	2.56037e+07	1.1573e+06	22.1236	1.10298e+08	3.09921e+06	35.5892	0.621639
A549_220_ No IFN_Set1_04	1.52035e+08	5.52785e+06	4.29207e+07	1.818e+06	23.6087	1.09114e+08	3.70985e+06	29.412	0.802689
A549_220_ No IFN_Set1_05	1.36034e+08	5.1731e+06	3.23922e+07	1.47453e+06	21.9678	1.03642e+08	3.69856e+06	28.0222	0.783942
A549_220_ No IFN_Set1_06	1.69026e+08	5.83326e+06	4.38308e+07	1.68707e+06	25.9805	1.25195e+08	4.14619e+06	30.1952	0.860419
A549_220_ No IFN_Set1_07	2.12656e+08	6.11028e+06	5.78841e+07	1.88694e+06	30.6761	1.54772e+08	4.22333e+06	36.6469	0.837071
A549_220_ No IFN_Set1_08	1.67923e+08	4.86315e+06	2.70946e+07	1.03328e+06	26.2219	1.40828e+08	3.82987e+06	36.7711	0.713111
A549_220_ No IFN_Set1_09	9.34252e+07	3.29393e+06	3.62338e+07	1.34747e+06	26.8902	5.71913e+07	1.94646e+06	29.3822	0.915186
A549_220_ No IFN_Set1_10	1.8018e+07	815729	7.24119e+06	347107	20.8616	1.07768e+07	468622	22.9967	0.907153
A549_220_ No IFN_Set2_01	1.80565e+08	6.86819e+06	4.17871e+07	1.88241e+06	22.1987	1.38778e+08	4.98578e+06	27.8348	0.797518
A549_220_ No IFN_Set2_02	1.93091e+08	7.07694e+06	5.01289e+07	2.03036e+06	24.6896	1.42963e+08	5.04658e+06	28.3286	0.871545
A549_220_ No IFN_Set2_03	1.27315e+08	5.05793e+06	2.76958e+07	1.21006e+06	22.8879	9.96197e+07	3.84786e+06	25.8896	0.884056
A549_220_ No IFN_Set2_04	1.24565e+08	5.31957e+06	3.09151e+07	1.48319e+06	20.8436	9.36503e+07	3.83638e+06	24.4111	0.853859
A549_220_ No IFN_Set2_05	2.49083e+08	8.43675e+06	5.85894e+07	2.26245e+06	25.8965	1.90494e+08	6.1743e+06	30.8527	0.839359
A549_220_ No IFN_Set2_06	3.41122e+08	9.98018e+06	8.41777e+07	2.81297e+06	29.9249	2.56944e+08	7.16721e+06	35.8499	0.834726
A549_220_ No IFN_Set2_07	2.54277e+08	8.42516e+06	5.76304e+07	2.23103e+06	25.8313	1.96646e+08	6.19412e+06	31.7473	0.813654
A549_220_ No IFN_Set2_08	3.24937e+08	9.52056e+06	7.52855e+07	2.54411e+06	29.592	2.49651e+08	6.97643e+06	35.7849	0.826941
A549_220_ No IFN_Set2_09	3.45021e+08	9.9001e+06	7.61554e+07	2.51896e+06	30.2328	2.68866e+08	7.38114e+06	36.426	0.829979
A549_220_ No IFN_Set2_10	5.60418e+08	1.0799e+07	1.37303e+08	2.62109e+06	52.3838	4.23115e+08	8.17794e+06	51.7386	1.01247
A549_220_ No IFN_Set3_01	1.31761e+08	3.72709e+06	3.68817e+07	1.17317e+06	31.4376	9.4879e+07	2.55391e+06	37.1505	0.846223
A549_220_ No IFN_Set3_02	1.40646e+08	3.75231e+06	4.06006e+07	1.24837e+06	32.5229	1.00045e+08	2.50394e+06	39.9551	0.813984
A549_220_ No IFN_Set3_03	1.41979e+08	4.03641e+06	3.909e+07	1.22395e+06	31.9376	1.02889e+08	2812462	36.5832	0.873014
A549_220_ No IFN_Set3_04	1.52956e+08	4.37738e+06	5.94676e+07	1.87697e+06	31.6827	9.34887e+07	2.50041e+06	37.3894	0.847372
A549_220_ No IFN_Set3_05	1.72273e+08	4.09622e+06	4.3025e+07	1.13472e+06	37.9167	1.29248e+08	2.96149e+06	43.6428	0.868796
A549_220_ No IFN_Set3_06	1.45205e+08	3.90982e+06	3.88792e+07	1161924	33.4611	1.06326e+08	2747898	38.6937	0.864769
A549_220_ No IFN_Set3_07	1.55613e+08	4.19457e+06	5.39734e+07	1.59434e+06	33.8531	1.0164e+08	2.60023e+06	39.0887	0.866058
A549_220_ No IFN_Set3_08	1.25915e+08	3.04493e+06	2.43638e+07	633720	38.4456	1.01551e+08	2.41121e+06	42.1163	0.912844
A549_220_ No IFN_Set3_09	1.22576e+08	3.26712e+06	4.31901e+07	1.25674e+06	34.3667	7.93858e+07	2.01038e+06	39.4879	0.87031
A549_220_ No IFN_Set3_10	1.75075e+08	4.19948e+06	4.01838e+07	1.03032e+06	39.0013	1.34892e+08	3.16916e+06	42.5638	0.916302
	Total pSTAT1	Total Area Measured	Nuclear pSTAT1	Total Nuclear Area	Average Nuclear Intensity	Cytoplasmic pSTAT1	Total Cytoplasmic Area	Average Cytoplasmic Intensity	Nuclear/Cytoplasmic Ratio
A549_220_IFN_Set1_01	1.3848e+09	8.29201e+06	8.90044e+08	3.03474e+06	293.285	4.9476e+08	9.85727e+06	50.1924	5.84322
A549_220_IFN_Set1_02	1.15688e+09	7.48742e+06	7.87788e+08	2110118	373.339	3.6909e+08	4.33731e+06	85.0967	4.38723
A549_220_IFN_Set1_03	7.08423e+08	6.03218e+06	4.47478e+08	1.22262e+06	366.001	2.60945e+08	4.80957e+06	54.2554	6.74588
A549_220_IFN_Set1_04	2.98625e+08	3.41865e+06	2.00561e+08	880941	227.667	9.80631e+07	2537713	38.6423	5.89166
A549_220_IFN_Set1_05	4.4375e+08	4510116	3.29652e+08	1478021	223.036	1.14098e+08	3.03209e+06	37.6301	5.92706
A549_220_IFN_Set1_06	4.19154e+08	4.77037e+06	2.67108e+08	1.07485e+06	248.508	1.52046e+08	3.69552e+06	41.1434	6.04004
A549_220_IFN_Set1_07	4.18701e+08	3.66216e+06	2.64186e+08	876649	301.359	1.54515e+08	2785514	55.4708	5.43274
A549_220_IFN_Set1_08	9.1123e+08	3.92969e+06	6.74546e+08	968926	696.179	2.36684e+08	1.06076e+06	223.127	3.1201
A549_220_IFN_Set1_09	2.99582e+08	3.37161e+06	2.18116e+08	935531	233.146	8.14661e+07	2436079	33.4415	6.97178
A549_220_IFN_Set1_10	1.64125e+09	7.01308e+06	1.17461e+09	2.76678e+06	424.54	4.66647e+08	4.2463e+06	109.895	3.86314
A549_220_IFN_Set2_01	4.31118e+08	9.21302e+06	4.21905e+08	1.48547e+06	284.02	5.63756e+08	7.72754e+06	72.9541	3.89314
A549_220_IFN_Set2_02	2.01846e+08	7.49726e+06	1.94349e+08	910368	213.484	3.6358e+08	6.3269e+06	57.4658	3.71497
A549_220_IFN_Set2_03	2.01442e+08	6.75963e+06	1.94683e+08	707508	275.167	3.93577e+08	5.87212e+06	67.0247	4.10545
A549_220_IFN_Set2_04	5.89372e+08	6.90634e+06	5.82465e+08	1.66069e+06	350.737	3.34955e+08	5.24564e+06	63.854	5.4928
A549_220_IFN_Set2_05	3.56292e+08	4.73836e+06	3.51554e+08	732906	479.671	2.051e+08	2.00545e+06	102.271	4.69018
A549_220_IFN_Set2_06	3.28547e+08	4.13684e+06	3.2441e+08	1.22952e+06	263.85	1.19761e+08	2.90732e+06	41.193	6.40523
A549_220_IFN_Set2_07	2.67611e+08	7.48944e+06	2.60122e+08	821918	316.481	3.73051e+08	5.93752e+06	62.8294	5.03715
A549_220_IFN_Set2_08	4.78296e+08	9.64264e+06	4.68653e+08	1.54103e+06	304.117	5.11368e+08	6.69461e+06	76.3851	3.98137
A549_220_IFN_Set2_09	5.09705e+08	8.72455e+06	5.0098e+08	1.9242e+06	260.357	4.37691e+08	6.80034e+06	64.3631	4.04514
A549_220_IFN_Set2_10	3.51544e+08	8.59538e+06	3.42948e+08	1.29859e+06	264.093	4.68529e+08	6.79679e+06	68.9339	3.8311
A549_220_IFN_Set3_01	1955588592	4.20971e+06	1828116745	3.57616e+06	511.195	1.27473e+08	633550	201.205	2.54067
A549_220_IFN_Set3_02	1120719923	5.01529e+06	8.60393e+08	1.62792e+06	528.521	2.60326e+08	3.38737e+06	76.8521	6.87712
A549_220_IFN_Set3_03	1360993633	4.90271e+06	1062076146	2.69529e+06	394.048	2.98919e+08	2.20742e+06	135.415	2.90992
A549_220_IFN_Set3_04	8.115e+08	4.35031e+06	5.65366e+08	1.26264e+06	447.764	2.46134e+08	3.08767e+06	79.7151	5.61706
A549_220_IFN_Set3_05	874104870	4.02684e+06	5.55222e+08	1.0566e+06	525.48	3.18883e+08	2.97024e+06	107.359	4.89459
A549_220_IFN_Set3_06	1271478710	4.6818e+06	9.8216e+08	1.45643e+06	674.359	2.89318e+08	2.22536e+06	130.01	5.187
A549_220_IFN_Set3_07	9.65991e+08	3.89841e+06	7.52287e+08	1.45612e+06	516.639	2.13704e+08	2.44229e+06	87.5012	5.90436
A549_220_IFN_Set3_08	2233884377	6.15937e+06	1823542095	3.14867e+06	579.146	4.10343e+08	3.0107e+06	136.295	4.24922
A549_220_IFN_Set3_09	3.65972e+08	3.94029e+06	2.69973e+08	1.33702e+06	201.922	9.59992e+07	2.60328e+06	36.8763	5.47566
A549_220_IFN_Set3_10	1915891405	5.13538e+06	1667206176	3.22431e+06	517.073	2.48685e+08	1.91107e+06	130.129	3.97356

## Sheet: A549 NINL KO
	Total pSTAT1	Total Area Measured	Nuclear pSTAT1	Total Nuclear Area	Average Nuclear Intensity	Cytoplasmic pSTAT1	Total Cytoplasmic Area	Average Cytoplasmic Intensity	Nuclear/Cytoplasmic Ratio
A549_252_No IFN_Set1_01	3.04753e+08	9.74915e+06	1.5345e+08	5.165e+06	29.7095	1.51303e+08	4.58415e+06	33.0057	0.900132
A549_252_No IFN_Set1_02	2.73175e+08	9.36454e+06	1.34247e+08	4.85549e+06	27.6485	1.38928e+08	4.50906e+06	30.8108	0.897365
A549_252_No IFN_Set1_03	2.05013e+08	7.76118e+06	1.1028e+08	4.30896e+06	25.5931	9.47338e+07	3.45222e+06	27.4414	0.932645
A549_252_No IFN_Set1_04	1.6514e+08	5.98167e+06	8.43127e+07	3.24281e+06	25.9999	8.08274e+07	2.73885e+06	29.5114	0.881011
A549_252_No IFN_Set1_05	2.23106e+08	7.322e+06	1.15912e+08	3.94755e+06	29.363	1.07194e+08	3.37445e+06	31.7665	0.924337
A549_252_No IFN_Set1_06	1.84463e+08	6.61908e+06	1.0007e+08	3.65561e+06	27.3745	8.43921e+07	2.96348e+06	28.4774	0.961271
A549_252_No IFN_Set1_07	2.05967e+08	8.02886e+06	1.07272e+08	4.3962e+06	24.401	9.86956e+07	3.63266e+06	27.169	0.898119
A549_252_No IFN_Set1_08	2.85153e+08	9.47135e+06	1.56608e+08	5.4612e+06	28.6765	1.28545e+08	4.01015e+06	32.0549	0.894607
A549_252_No IFN_Set1_09	1.86018e+08	6.99221e+06	1.0275e+08	4.09577e+06	25.0869	8.32673e+07	2.89644e+06	28.7482	0.872645
A549_252_No IFN_Set1_10	1.7119e+08	5.6793e+06	8.09151e+07	2.65562e+06	30.4693	9.02749e+07	3.02368e+06	29.856	1.02054
A549_252_ No IFN_Set2_01	9.10704e+07	7.58475e+06	8.34857e+07	3.71526e+06	22.471	1.05908e+08	3.86949e+06	27.3699	0.82101
A549_252_ No IFN_Set2_02	5.83756e+07	5.02931e+06	5.33463e+07	2.72161e+06	19.601	5.59111e+07	2.3077e+06	24.2281	0.809021
A549_252_ No IFN_Set2_03	1.35622e+08	8.85758e+06	1.26765e+08	5.42667e+06	23.3596	1.01968e+08	3.43091e+06	29.7205	0.785976
A549_252_ No IFN_Set2_04	7.55831e+07	5.36372e+06	7.02194e+07	3.32716e+06	21.1049	4.80874e+07	2.03657e+06	23.612	0.893822
A549_252_ No IFN_Set2_05	8.03742e+07	6.41504e+06	7.39591e+07	3.71429e+06	19.912	6.34692e+07	2.70074e+06	23.5007	0.847296
A549_252_ No IFN_Set2_06	8.39212e+07	5.95934e+06	7.79619e+07	3.2467e+06	24.0127	9.81423e+07	2.71264e+06	36.1796	0.663707
A549_252_ No IFN_Set2_07	1.20327e+08	8.00126e+06	1.12326e+08	4.39166e+06	25.5771	1.11476e+08	3.6096e+06	30.8833	0.828184
A549_252_ No IFN_Set2_08	1.34372e+08	9.42699e+06	1.24945e+08	5.14196e+06	24.299	1.34916e+08	4.28503e+06	31.4853	0.771756
A549_252_ No IFN_Set2_09	1.37327e+08	9.14864e+06	1.28178e+08	4.17896e+06	30.6723	1.88243e+08	4.96968e+06	37.8784	0.809758
A549_252_ No IFN_Set2_10	1.29637e+08	9.59713e+06	1.2004e+08	4.67822e+06	25.6593	1.619e+08	4.9189e+06	32.9138	0.779591
A549_252_ No IFN_Set3_01	1.67831e+08	4.49608e+06	9.30925e+07	2.51781e+06	36.9736	7.47384e+07	1.97827e+06	37.7797	0.978665
A549_252_ No IFN_Set3_02	6.77249e+07	1.89424e+06	4.83763e+07	1.37845e+06	35.0948	1.93486e+07	515790	37.5125	0.93555
A549_252_ No IFN_Set3_03	1.62442e+08	4.28601e+06	9.12384e+07	2.53073e+06	36.0522	7.12034e+07	1.75528e+06	40.5652	0.888747
A549_252_ No IFN_Set3_04	1.36272e+08	3.95073e+06	7.08404e+07	2.17783e+06	32.5279	6.54317e+07	1.7729e+06	36.9066	0.881358
A549_252_ No IFN_Set3_05	2.03975e+08	5.59233e+06	1.1294e+08	3.23671e+06	34.8935	9.10349e+07	2.35563e+06	38.6457	0.902907
A549_252_ No IFN_Set3_06	9.26848e+07	2.92125e+06	6.07438e+07	1.98055e+06	30.6702	3.19409e+07	940709	33.9541	0.903286
A549_252_ No IFN_Set3_07	1.68461e+08	4.66654e+06	9.80194e+07	2.82389e+06	34.7107	7.04418e+07	1.84265e+06	38.2285	0.90798
A549_252_ No IFN_Set3_08	2.02879e+08	5.74144e+06	1.06411e+08	3.08497e+06	34.4935	9.64671e+07	2.65648e+06	36.3139	0.949871
A549_252_ No IFN_Set3_09	2.52936e+08	6.16819e+06	1.52887e+08	3.97869e+06	38.4265	1.00049e+08	2.18951e+06	45.6947	0.840941
A549_252_ No IFN_Set3_10	2.40357e+08	6.12863e+06	1.31134e+08	3.51192e+06	37.3399	1.09223e+08	2.61671e+06	41.7404	0.894574
	Total pSTAT1	Total Area Measured	Nuclear pSTAT1	Total Nuclear Area	Average Nuclear Intensity	Cytoplasmic pSTAT1	Total Cytoplasmic Area	Average Cytoplasmic Intensity	Nuclear/Cytoplasmic Ratio
A549_252_IFN_Set1_01	5.82465e+08	4.98962e+06	4.38606e+08	2.06507e+06	212.393	1.43859e+08	2.92455e+06	49.1901	4.3178
A549_252_IFN_Set1_02	2.59477e+09	9.33891e+06	2.04758e+09	6.25979e+06	327.1	5.47198e+08	3.07912e+06	177.712	1.84062
A549_252_IFN_Set1_03	1.32541e+09	7.27062e+06	1.0266e+09	3.45522e+06	297.115	2.98812e+08	3.8154e+06	78.3173	3.79374
A549_252_IFN_Set1_04	2.84603e+09	1.0125e+07	2.5284e+09	8.70863e+06	290.333	3.17629e+08	1.41637e+06	224.255	1.29465
A549_252_IFN_Set1_05	2.80186e+09	1.02395e+07	2.34354e+09	7.81561e+06	299.853	4.58325e+08	2.42388e+06	189.087	1.58579
A549_252_IFN_Set1_06	1.41416e+09	8.82311e+06	1.07197e+09	4.72508e+06	226.869	3.42184e+08	4.09803e+06	83.4998	2.717
A549_252_IFN_Set1_07	3.0999e+09	10046819	2756139960	8.16813e+06	337.426	3.43763e+08	1.87869e+06	182.98	1.84406
A549_252_IFN_Set1_08	3.03016e+09	1.01684e+07	2664390960	8.07201e+06	330.078	3.65771e+08	2.09637e+06	174.478	1.8918
A549_252_IFN_Set1_09	1.37807e+09	7.63829e+06	9.34883e+08	3.34578e+06	279.422	4.43192e+08	4.29251e+06	103.248	2.70633
A549_252_IFN_Set1_10	2.55781e+09	9.55392e+06	2.05463e+09	6.51962e+06	315.146	5.03174e+08	3.0343e+06	165.829	1.90043
A549_252_IFN_Set2_01	2.57456e+09	1.66614e+07	2.5579e+09	1.03147e+07	247.987	9.47467e+08	6.34679e+06	149.283	1.66119
A549_252_IFN_Set2_02	1.80736e+09	1.37789e+07	1.79358e+09	7.12127e+06	251.863	5.56354e+08	6.65765e+06	83.5662	3.01393
A549_252_IFN_Set2_03	3.95986e+08	9.31754e+06	3.86669e+08	2.51663e+06	153.645	2.6025e+08	6.80091e+06	38.2669	4.01509
A549_252_IFN_Set2_04	2.40016e+08	8.97159e+06	2.31045e+08	2.48957e+06	92.8049	2.28877e+08	6.48202e+06	35.3096	2.62832
A549_252_IFN_Set2_05	9.24504e+08	1.17961e+07	9.12708e+08	4.17458e+06	218.635	5.36271e+08	7.62153e+06	70.3627	3.10725
A549_252_IFN_Set2_06	2.67901e+08	6.8199e+06	2.61081e+08	2.43003e+06	107.44	1.68659e+08	4.38987e+06	38.4201	2.79645
A549_252_IFN_Set2_07	5.06237e+08	9.89382e+06	4.96343e+08	4.16076e+06	119.291	2.1899e+08	5.73305e+06	38.1979	3.12298
A549_252_IFN_Set2_08	1.21631e+09	1.46338e+07	1.20168e+09	8.23388e+06	145.944	4.65013e+08	6.39996e+06	72.6587	2.00862
A549_252_IFN_Set2_09	8.65168e+08	1.30268e+07	8.52141e+08	5.57057e+06	152.972	4.67515e+08	7.45624e+06	62.7012	2.4397
A549_252_IFN_Set2_10	1.67759e+09	1.59345e+07	1.66166e+09	8.97038e+06	185.238	6.53805e+08	6.96409e+06	93.8824	1.97309
A549_252_IFN_Set3_01	7.09603e+08	5.17695e+06	5.4835e+08	3.06398e+06	178.967	1.61253e+08	2.11297e+06	76.3158	2.34508
A549_252_IFN_Set3_02	6.57622e+08	4.81261e+06	5.03044e+08	2.36725e+06	212.501	1.54579e+08	2.44536e+06	63.2131	3.36166
A549_252_IFN_Set3_03	1.1325e+09	5.85242e+06	9.38409e+08	3.90464e+06	240.332	1.94087e+08	1.94778e+06	99.6454	2.41187
A549_252_IFN_Set3_04	7.50529e+08	3.9891e+06	5.59096e+08	1.91318e+06	292.234	1.91433e+08	2.07592e+06	92.2162	3.16901
A549_252_IFN_Set3_05	4.70356e+08	2.45354e+06	3.91253e+08	1207542	324.008	7.91028e+07	1245994	63.4857	5.10364
A549_252_IFN_Set3_06	5.82319e+08	3.64735e+06	4.69069e+08	1.8158e+06	258.326	1.13251e+08	1.83155e+06	61.8334	4.17777
A549_252_IFN_Set3_07	1.20273e+09	5.14482e+06	1.03939e+09	3.5197e+06	295.306	1.63339e+08	1.62512e+06	100.509	2.93812
A549_252_IFN_Set3_08	4.65935e+08	2.38056e+06	3.73816e+08	1141687	327.424	9.21198e+07	1.23887e+06	74.3577	4.40336
A549_252_IFN_Set3_09	7.02155e+08	5.34917e+06	5.57339e+08	3130805	178.018	1.44817e+08	2.21836e+06	65.2809	2.72695
A549_252_IFN_Set3_10	4.63935e+08	2.61081e+06	4.10295e+08	1.57731e+06	260.124	5.36398e+07	1.0335e+06	51.9009	5.01194

## Sheet: A549 NIN KO
	Total pSTAT1	Total Area Measured	Nuclear pSTAT1	Total Nuclear Area	Average Nuclear Intensity	Cytoplasmic pSTAT1	Total Cytoplasmic Area	Average Cytoplasmic Intensity	Nuclear/Cytoplasmic Ratio
A549_298_No IFN_Set1_01	1.52113e+08	6.0087e+06	3.9425e+07	1.79565e+06	21.9558	1.12689e+08	4.21305e+06	26.7475	0.820856
A549_298_No IFN_Set1_02	1.77671e+08	6.32989e+06	4.34332e+07	1.7459e+06	24.8772	1.34237e+08	4.58399e+06	29.2839	0.849518
A549_298_No IFN_Set1_03	1.9061e+08	6.89343e+06	3.74535e+07	1558118	24.0376	1.53157e+08	5.33531e+06	28.7063	0.837365
A549_298_No IFN_Set1_04	2.092e+08	7.27583e+06	4.3081e+07	1.66952e+06	25.8044	1.66119e+08	5.60631e+06	29.6308	0.870864
A549_298_No IFN_Set1_05	1.9736e+08	6.83963e+06	3.7738e+07	1.4288e+06	26.4124	1.59622e+08	5.41084e+06	29.5003	0.895325
A549_298_No IFN_Set1_06	1.67096e+08	5.74053e+06	3.36822e+07	1.50754e+06	22.3425	1.33413e+08	4.23299e+06	31.5176	0.708889
A549_298_No IFN_Set1_07	1.02482e+08	4.48239e+06	4.09058e+07	1.97443e+06	20.7178	6.15761e+07	2.50797e+06	24.5522	0.843825
A549_298_No IFN_Set1_08	6.9355e+07	3.37777e+06	3.61138e+07	1.87806e+06	19.2293	3.32413e+07	1.49971e+06	22.1651	0.867547
A549_298_No IFN_Set1_09	1.39981e+08	5.51702e+06	4.78346e+07	2.14593e+06	22.2909	9.21467e+07	3371090	27.3344	0.815488
A549_298_No IFN_Set1_10	8.15886e+07	3.63431e+06	3.39694e+07	1.7023e+06	19.955	4.76193e+07	1.93201e+06	24.6475	0.809616
A549_298_ No IFN_Set2_01	7.26762e+07	8.80264e+06	6.38736e+07	2.37923e+06	26.8463	2.52721e+08	6.42341e+06	39.3438	0.682352
A549_298_ No IFN_Set2_02	6.77148e+07	8.29153e+06	5.94233e+07	2.33511e+06	25.4477	2.36019e+08	5.95642e+06	39.6243	0.642226
A549_298_ No IFN_Set2_03	6.15299e+07	7.63363e+06	5.38962e+07	2.24248e+06	24.0343	1.88091e+08	5.39115e+06	34.8888	0.688882
A549_298_ No IFN_Set2_04	7.03413e+07	8.26145e+06	6.20798e+07	2.55066e+06	24.3387	1.66839e+08	5.7108e+06	29.2146	0.833101
A549_298_ No IFN_Set2_05	7.70525e+07	8.41009e+06	6.86424e+07	2.40779e+06	28.5084	2.0229e+08	6.0023e+06	33.7021	0.845895
A549_298_ No IFN_Set2_06	6.65033e+07	8.43473e+06	5.80686e+07	2.32966e+06	24.9258	1.96815e+08	6.10507e+06	32.238	0.773182
A549_298_ No IFN_Set2_07	7.06989e+07	8.67255e+06	6.20264e+07	2.26746e+06	27.355	2.2448e+08	6.40508e+06	35.0472	0.78052
A549_298_ No IFN_Set2_08	7.42819e+07	9.08934e+06	6.51926e+07	2.52449e+06	25.8241	2.68683e+08	6.56485e+06	40.9275	0.630972
A549_298_ No IFN_Set2_09	5.43831e+07	5.25036e+06	4.91327e+07	2.07357e+06	23.6947	9.12618e+07	3.17679e+06	28.7277	0.824803
A549_298_ No IFN_Set2_10	4.64141e+07	4.34058e+06	4.20735e+07	1.87734e+06	22.4113	8.47829e+07	2.46325e+06	34.4192	0.651129
A549_298_ No IFN_Set3_01	1.02307e+08	3.01748e+06	3.88747e+07	1.25873e+06	30.884	6.34328e+07	1.75875e+06	36.0669	0.856297
A549_298_ No IFN_Set3_02	2.02339e+08	4.59176e+06	5.94321e+07	1.4321e+06	41.5001	1.42907e+08	3.15967e+06	45.2285	0.917565
A549_298_ No IFN_Set3_03	1.67522e+08	3.97794e+06	5.38537e+07	1.33547e+06	40.3255	1.13668e+08	2.64247e+06	43.0159	0.937457
A549_298_ No IFN_Set3_04	1.44018e+08	3.40187e+06	4.46169e+07	1.14783e+06	38.8705	9.9401e+07	2.25404e+06	44.0991	0.881436
A549_298_ No IFN_Set3_05	1.88622e+08	4.8108e+06	4.97843e+07	1.40933e+06	35.3249	1.38838e+08	3.40147e+06	40.8171	0.865443
A549_298_ No IFN_Set3_06	1.98711e+08	4.93703e+06	5.713e+07	1.55168e+06	36.8182	1.41581e+08	3.38535e+06	41.8217	0.88036
A549_298_ No IFN_Set3_07	1.93201e+08	4.65427e+06	6.23428e+07	1599132	38.9854	1.30858e+08	3.05514e+06	42.8322	0.910188
A549_298_ No IFN_Set3_08	1.97639e+08	4.91344e+06	4.73704e+07	1.33674e+06	35.4373	1.50269e+08	3.5767e+06	42.0131	0.843481
A549_298_ No IFN_Set3_09	1.25753e+08	3.98009e+06	3.9475e+07	1.32869e+06	29.7097	8.6278e+07	2.6514e+06	32.5405	0.913007
A549_298_ No IFN_Set3_10	1.65157e+08	4397019	3.97102e+07	1.17276e+06	33.8605	1.25446e+08	3.22426e+06	38.907	0.870293
	Total pSTAT1	Total Area Measured	Nuclear pSTAT1	Total Nuclear Area	Average Nuclear Intensity	Cytoplasmic pSTAT1	Total Cytoplasmic Area	Average Cytoplasmic Intensity	Nuclear/Cytoplasmic Ratio
A549_298_IFN_Set1_01	1.15345e+09	9.20784e+06	7.18325e+08	2.13629e+06	336.248	4.35127e+08	5.02394e+06	86.6108	3.88229
A549_298_IFN_Set1_02	1.01909e+09	9.62927e+06	5.9052e+08	1.92923e+06	306.09	4.28575e+08	6.28352e+06	68.2063	4.48771
A549_298_IFN_Set1_03	1.31963e+09	9.27592e+06	6.50556e+08	1.65203e+06	393.792	6.69073e+08	6.57934e+06	101.693	3.87236
A549_298_IFN_Set1_04	1.80477e+09	9.36394e+06	1.11321e+09	2.32661e+06	478.467	6.91563e+08	13042495	53.0238	9.02363
A549_298_IFN_Set1_05	1.54687e+09	9.14369e+06	9.59945e+08	2.36766e+06	405.44	5.86923e+08	4.87292e+06	120.446	3.36616
A549_298_IFN_Set1_06	9.27907e+08	9.19703e+06	5.25951e+08	2.00792e+06	261.938	4.01956e+08	5.90718e+06	68.0453	3.84947
A549_298_IFN_Set1_07	1.34784e+09	9.30116e+06	7.98117e+08	2.17891e+06	366.292	5.49727e+08	5.69999e+06	96.4435	3.798
A549_298_IFN_Set1_08	1.16938e+09	9.09545e+06	6.49897e+08	1.90584e+06	341.004	5.1948e+08	6.02524e+06	86.2174	3.95516
A549_298_IFN_Set1_09	1.28758e+09	9.72042e+06	7.50124e+08	2.26601e+06	331.033	5.37457e+08	5827581	92.2265	3.58935
A549_298_IFN_Set1_10	9.86548e+08	8.70047e+06	5.95924e+08	1.99732e+06	298.361	3.90624e+08	9634572	40.544	7.35894
A549_298_ IFN_Set2_01	4.07641e+08	8.04958e+06	3.99591e+08	1.18797e+06	336.366	4.30031e+08	6.3473e+06	67.7502	4.96479
A549_298_IFN_Set2_02	1.73223e+09	6459020	1.22035e+09	1.93413e+06	630.955	5.11881e+08	4.52489e+06	113.126	5.57747
A549_298_ IFN_Set2_03	6.73226e+08	9.74471e+06	6.63482e+08	2.08986e+06	317.477	5.1559e+08	6.3562e+06	81.1161	3.91386
A549_298_ IFN_Set2_04	1.12086e+09	9.13501e+06	1.11172e+09	2.26094e+06	491.708	7.39188e+08	5.05002e+06	146.373	3.35927
A549_298_ IFN_Set2_05	5.74554e+08	8.99979e+06	5.65554e+08	1.89022e+06	299.2	4.22904e+08	6.10349e+06	69.2889	4.31816
A549_298_ IFN_Set2_06	7.01399e+08	9.47141e+06	6.91927e+08	2.21212e+06	312.789	5.19601e+08	9.28799e+06	55.9433	5.59117
A549_298_ IFN_Set2_07	8.59446e+08	9.29819e+06	8.50148e+08	2.10428e+06	404.009	6.60401e+08	2.80264e+06	235.635	1.71455
A549_298_ IFN_Set2_08	5.92424e+08	9.14167e+06	5.83282e+08	1.88342e+06	309.694	5.03701e+08	5.94885e+06	84.6721	3.65757
A549_298_ IFN_Set2_09	6.04359e+08	9.42054e+06	5.94938e+08	1.83999e+06	323.337	5.88171e+08	6.0845e+06	96.6672	3.34485
A549_298_ IFN_Set2_10	1.0841e+09	8.68327e+06	1.07542e+09	2.45569e+06	437.927	5.47038e+08	3.67958e+06	148.669	2.94566
A549_298_ IFN_Set3_01	2.57506e+08	5.96766e+06	2.51539e+08	814313	308.897	2.8401e+08	8.82768e+06	32.1727	9.60122
A549_298_IFN_Set3_02	1.67511e+09	6.49657e+06	1.2161e+09	2.33603e+06	520.584	4.59007e+08	4.16054e+06	110.324	4.71869
A549_298_IFN_Set3_03	2.5859e+09	7.05059e+06	1.91591e+09	3.27047e+06	585.821	6.69989e+08	3.78012e+06	177.24	3.30524
A549_298_IFN_Set3_04	1.47421e+09	5.38231e+06	1.13767e+09	2.00391e+06	567.728	3.36533e+08	3.3784e+06	99.6129	5.69934
A549_298_IFN_Set3_05	1.02972e+09	5.64416e+06	8.19187e+08	2.0597e+06	397.722	2.10531e+08	3.58446e+06	58.7344	6.77153
A549_298_IFN_Set3_06	6.66068e+08	5.2467e+06	5.14469e+08	1.79748e+06	286.217	1.51598e+08	2449219	61.8966	4.62412
A549_298_IFN_Set3_07	2.52937e+09	5965311	2.06267e+09	3.06948e+06	671.994	4.66695e+08	2.89583e+06	161.161	4.1697
A549_298_IFN_Set3_08	2.18061e+09	7.74717e+06	1.46856e+09	3.27695e+06	448.15	7.12044e+08	4.47022e+06	159.286	2.81349
A549_298_IFN_Set3_09	2.19797e+09	7.05584e+06	1.72225e+09	3.41614e+06	504.151	4.75719e+08	3.6397e+06	130.703	3.85723
A549_298_IFN_Set3_10	2.07099e+09	7.22268e+06	1.57621e+09	2.92829e+06	538.27	4.94782e+08	4.2944e+06	115.216	4.67185
