# Supplementary material for: Antiviral function and viral antagonism of the rapidly evolving dynein activating adaptor NINL
Source: eLife. 2022 Oct 12;11:e81606. doi: 10.7554/eLife.81606 (PMC9651953; doi:10.7554/eLife.81606)
Supplement: Figure 6—source data 2. [file elife-81606-fig6-data2.xlsx]

## Sheet: NINL(1-1062)_Ctrl_+EtOH
Set	Whole Cell Integrated Density	Centrosome Integrated Density	Percent Of Total Flourescence at Centrsome	Whole Cell Area	Centrosome Area	Percent of Total Area at Centrosome	Normalized Peroxisome Flourescence at Centrosome
NINL(1-1062)_No Infection_+EtOH (REP. 1)
1	2832488	197393	0.0696889	1066.19	95.052	0.0891509	0.781696
2	1275892	288876	0.226411	617.878	95.052	0.153836	1.47177
3	2436197	157474	0.0646393	1051.96	95.052	0.0903567	0.715379
4	3406205	298310	0.0875784	930.87	95.052	0.102111	0.857679
5	1735452	197632	0.113879	1149.05	95.052	0.0827219	1.37665
6	1270010	306879	0.241635	1321.73	95.052	0.071915	3.36001
7	929527	151453	0.162936	1098.03	95.052	0.0865657	1.88222
8	2103619	199774	0.0949668	1387.79	95.052	0.0684915	1.38655
9	2441349	254681	0.10432	766.583	95.052	0.123994	0.841326
10	1069021	248813	0.232748	1309.05	95.052	0.0726113	3.2054
11	1778886	135906	0.0763995	994.482	95.052	0.0955794	0.79933
12	2228401	164115	0.073647	1056.77	95.052	0.0899455	0.818796
13	3443051	310773	0.0902609	1071.67	95.052	0.0886951	1.01765
14	1122223	241347	0.215062	1104.72	95.052	0.086042	2.4995
15	2426165	139181	0.0573667	779.322	95.052	0.121967	0.470344
16	2021560	285229	0.141094	932.655	95.052	0.101915	1.38442
17	2837526	193493	0.0681907	1390.27	95.052	0.0683696	0.997384
18	2161736	232359	0.107487	1255.14	95.052	0.0757299	1.41935
19	854971	185021	0.216406	1299.7	95.052	0.0731339	2.95904
20	882827	169395	0.191878	458.37	95.052	0.20737	0.925295
21	3334774	93033	0.0278978	769.967	95.052	0.123449	0.225986
22	1844312	271522	0.147221	549.432	95.052	0.173001	0.850987
23	1235850	86162	0.0697188	852.359	95.052	0.111516	0.625189
24	909360	144828	0.159264	1109.12	95.052	0.0857005	1.85838
25	2483016	286611	0.115429	432.765	95.052	0.219639	0.525538
26	3410166	121907	0.0357481	1004.02	95.052	0.0946718	0.3776
27	1889738	181965	0.0962911	782.122	95.052	0.121531	0.792318
28	920690	138414	0.150337	1029.14	95.052	0.0923603	1.62773
29	1729238	232257	0.134312	639.413	95.052	0.148655	0.903513
		Average	0.1232			Average	1.27438
NINL(1-1062)_No Infection_+EtOH (REP. 2)
1	1662505	201022	0.120915	687.279	95.052	0.138302	0.874283
2	2866461	184766	0.0644579	687.754	95.052	0.138206	0.466388
3	1998363	178252	0.089199	752.792	95.052	0.126266	0.706438
4	2873181	307039	0.106864	1271.23	95.052	0.0747714	1.42921
5	1547311	117993	0.0762568	607.815	95.052	0.156383	0.487628
6	1322689	136640	0.103305	532.995	95.052	0.178336	0.579271
7	3094050	211433	0.0683354	1136.84	95.052	0.0836107	0.817304
8	3435083	291269	0.0847924	1315.88	95.052	0.0722344	1.17385
9	1605222	179020	0.111524	750.276	95.052	0.126689	0.880291
10	1439306	175065	0.121632	1174.53	95.052	0.0809274	1.50297
11	3086582	296109	0.0959343	1474.69	95.052	0.0644554	1.48838
12	2884212	111808	0.0387655	942.443	95.052	0.100857	0.384361
13	3017877	251669	0.0833927	1045.22	95.052	0.0909401	0.917007
14	3210847	203128	0.0632631	562.844	95.052	0.168878	0.374608
15	1646113	95957	0.0582931	1441.08	95.052	0.065959	0.883778
16	1164474	274796	0.235983	1222.8	95.052	0.0777333	3.0358
17	1902004	276462	0.145353	1398.72	95.052	0.0679565	2.13891
18	3377677	274672	0.0813198	739.897	95.052	0.128467	0.633004
19	2420441	282123	0.116559	1361.79	95.052	0.0697992	1.66991
20	2562143	89537	0.0349461	1052.39	95.052	0.0903201	0.386914
21	1852220	104257	0.0562876	452.365	95.052	0.210122	0.26788
22	2093311	222630	0.106353	1179.92	95.052	0.0805577	1.32021
23	1536296	190024	0.12369	810.047	95.052	0.117341	1.0541
24	930891	154934	0.166436	1171.93	95.052	0.0811073	2.05205
25	1147021	220326	0.192085	1433.18	95.052	0.0663226	2.89623
26	2743141	111101	0.0405014	858.63	95.052	0.110702	0.36586
27	2361681	268269	0.113592	941.957	95.052	0.100909	1.12569
28	2574726	308567	0.119845	957.631	95.052	0.0992574	1.20741
29	1572877	126546	0.0804551	1279.45	95.052	0.0742911	1.08297
30	2183813	289012	0.132343	975.708	95.052	0.0974185	1.3585
		Average	0.101089			Average	1.11871
NINL(1-1062)_No Infection_+EtOH (REP. 3)
1	2491623	146876	0.0589479	942.248	95.052	0.100878	0.584349
2	2886188	158963	0.0550771	571.226	95.052	0.1664	0.330992
3	2119091	99942	0.0471627	1101.74	95.052	0.0862742	0.54666
4	2778931	197329	0.071009	874.963	95.052	0.108635	0.653644
5	981761	138757	0.141335	958.107	95.052	0.0992081	1.42463
6	3318671	141389	0.0426041	499.13	95.052	0.190435	0.22372
7	2839034	308391	0.108625	1065.88	95.052	0.0891771	1.21808
8	2043679	230487	0.11278	682.783	95.052	0.139213	0.810131
9	1849844	183240	0.099057	904.013	95.052	0.105145	0.942103
10	1607553	242003	0.150541	1264.11	95.052	0.0751929	2.00207
11	1996950	97459	0.0488039	508.065	95.052	0.187086	0.260863
12	3421609	304631	0.0890315	462.31	95.052	0.205602	0.433028
13	2661273	309530	0.116309	589.53	95.052	0.161233	0.72137
14	1625976	111163	0.0683669	474.316	95.052	0.200398	0.341155
15	1173702	203949	0.173766	1290.67	95.052	0.0736456	2.35948
16	1271684	200920	0.157995	1389.82	95.052	0.0683915	2.31016
17	3166691	287219	0.0907	1381.49	95.052	0.0688042	1.31823
18	1067832	127786	0.119669	905.639	95.052	0.104956	1.14018
19	2181986	226344	0.103733	1375.12	95.052	0.0691226	1.50071
20	1780967	100973	0.0566956	454.044	95.052	0.209345	0.270823
21	2859841	129322	0.04522	491.634	95.052	0.193339	0.23389
22	2665591	213681	0.0801627	1387.02	95.052	0.0685296	1.16975
23	2226508	176918	0.0794599	814.819	95.052	0.116654	0.681157
24	2169654	186111	0.0857791	494.804	95.052	0.1921	0.446533
25	3006122	109365	0.0363808	1323.17	95.052	0.0718368	0.506437
26	857050	172605	0.201394	1442.14	95.052	0.0659103	3.05558
27	2836859	265582	0.0936183	565.048	95.052	0.168219	0.556525
28	854323	126718	0.148326	696.646	95.052	0.136442	1.08709
29	2659323	233185	0.0876859	1483.5	95.052	0.0640727	1.36854
30	1125910	203715	0.180934	412.892	95.052	0.23021	0.78595
		Average	0.0983723			Average	0.976128

## Sheet: NINL(1-1062)_Ctrl_+Rapalog
Set	Whole Cell Integrated Density	Centrosome Integrated Density	Percent Of Total Flourescence at Centrsome	Whole Cell Area	Centrosome Area	Percent of Total Area at Centrosome	Normalized Peroxisome Flourescence at Centrosome
NINL(1-1062)_No Infection_+EtOH (REP. 1)
1	891732	291903	0.327344	1298.36	95.052	0.0732093	4.47134
2	1298401	403844	0.311032	629.687	95.052	0.150951	2.06048
3	1659025	410216	0.247263	1139	95.052	0.0834518	2.96295
4	1779640	350488	0.196943	1318.03	95.052	0.0721169	2.73089
5	1981407	450142	0.227183	1359.44	95.052	0.0699198	3.2492
6	1467256	527922	0.359802	1227.46	95.052	0.0774382	4.64631
7	1048206	320049	0.30533	1521.67	95.052	0.0624656	4.88798
8	637202	244160	0.383175	1305.12	95.052	0.0728299	5.26123
9	1629147	259015	0.158988	1021.23	95.052	0.0930757	1.70816
10	1224912	326434	0.266496	644.821	95.052	0.147408	1.80788
11	1073162	355735	0.331483	686.562	95.052	0.138446	2.39431
12	818304	257294	0.314423	967.573	95.052	0.0982376	3.20064
13	1818617	327004	0.179809	581.332	95.052	0.163507	1.0997
14	989368	481009	0.486178	1139.29	95.052	0.0834307	5.82733
15	1587328	430325	0.2711	1194.99	95.052	0.0795419	3.40827
16	1922980	517155	0.268934	1027.23	95.052	0.0925326	2.90637
17	1249277	287383	0.230039	1466.85	95.052	0.0648002	3.54998
18	1395503	621257	0.445185	1391.84	95.052	0.0682924	6.51881
19	1172456	193105	0.164701	1477.07	95.052	0.0643515	2.5594
20	1789835	549404	0.306958	1167.48	95.052	0.0814166	3.77021
21	1528135	190216	0.124476	991.984	95.052	0.0958201	1.29906
22	1056506	464749	0.439892	613.524	95.052	0.154928	2.83934
23	1970086	486827	0.24711	896.543	95.052	0.106021	2.33077
24	1591468	621171	0.390313	1053.07	95.052	0.0902617	4.32424
25	1538200	664063	0.431714	1293.5	95.052	0.0734841	5.87493
26	655182	239048	0.364857	808.337	95.052	0.11759	3.1028
27	1855227	488303	0.263204	881.929	95.052	0.107777	2.44211
28	1907613	621598	0.325851	1262.61	95.052	0.0752821	4.3284
29	1375271	584503	0.425009	551.957	95.052	0.172209	2.46798
30	2096348	587953	0.280465	1266.5	95.052	0.0750508	3.73701
		Average	0.302509			Average	3.39227
NINL(1-1062)_No Infection_+EtOH (REP. 2)
1	947250	377299	0.39831	1128.37	95.052	0.0842384	4.72837
2	880460	346848	0.39394	977.102	95.052	0.0972795	4.04956
3	1564695	505975	0.32337	682.525	95.052	0.139265	2.32197
4	961898	189600	0.19711	983.306	95.052	0.0966657	2.03909
5	2109280	483200	0.229083	1570.34	95.052	0.0605295	3.78465
6	1694866	510026	0.300924	1147.46	95.052	0.0828368	3.63273
7	1588772	267647	0.168462	1215.99	95.052	0.0781682	2.15512
8	974193	438561	0.450179	1046.75	95.052	0.0908068	4.95754
9	1207489	474727	0.393152	1550.14	95.052	0.0613182	6.41168
10	606114	188510	0.311014	586.302	95.052	0.162121	1.9184
11	1265968	665153	0.525411	658.675	95.052	0.144308	3.6409
12	1821155	251253	0.137964	966.152	95.052	0.0983821	1.40232
13	1290891	426193	0.330154	1315.56	95.052	0.0722524	4.56946
14	1230293	570647	0.46383	682.04	95.052	0.139364	3.32819
15	808615	218409	0.270103	724.336	95.052	0.131226	2.0583
16	577605	224802	0.389197	1186.28	95.052	0.0801262	4.8573
17	2116419	495508	0.234126	1185.04	95.052	0.0802098	2.91891
18	660965	227278	0.343858	1447.89	95.052	0.0656485	5.23787
19	890790	288395	0.323752	1462.63	95.052	0.0649872	4.98178
20	953616	435046	0.456207	1262.2	95.052	0.0753069	6.05797
21	982030	266029	0.270897	538.54	95.052	0.176499	1.53483
22	748511	323794	0.432584	1290.22	95.052	0.0736712	5.87183
23	1054177	360005	0.341503	1593.69	95.052	0.0596426	5.72583
24	1707171	346137	0.202755	1504.94	95.052	0.0631602	3.21017
25	1438735	193054	0.134183	1118.18	95.052	0.0850064	1.57851
26	1599116	568163	0.355298	969.484	95.052	0.098044	3.62387
27	803912	234438	0.291621	1007.38	95.052	0.0943555	3.09067
28	776606	344055	0.443024	1306.16	95.052	0.0727721	6.08783
29	1773373	210527	0.118716	947.071	95.052	0.100364	1.18285
30	1390829	409106	0.294145	1358.44	95.052	0.0699715	4.20379
		Average	0.320883			Average	3.71893
NINL(1-1062)_No Infection_+EtOH (REP. 3)
1	836397	407068	0.486692	1647.34	95.052	0.0577002	8.43485
2	1414383	267329	0.189008	1436.88	95.052	0.0661517	2.85718
3	956999	348232	0.363879	914.506	95.052	0.103938	5.50067
4	975863	283688	0.290705	686.798	95.052	0.138399	2.10049
5	1765333	203113	0.115056	1555.79	95.052	0.0610957	1.88322
6	1577121	484624	0.307284	1019.33	95.052	0.0932491	3.2953
7	1823334	379069	0.207899	1401.68	95.052	0.0678131	3.06576
8	1110452	335146	0.30181	1362.82	95.052	0.0697467	4.32723
9	1599035	224411	0.140342	1608.29	95.052	0.0591012	2.3746
10	1699854	418664	0.246294	1637.54	95.052	0.0580455	4.24312
11	2092991	221721	0.105935	1338.22	95.052	0.0710289	1.49144
12	927923	226791	0.244407	1131.42	95.052	0.0840109	2.90923
13	637102	180644	0.28354	921.886	95.052	0.103106	2.74999
14	906429	316945	0.349663	1200.02	95.052	0.0792089	4.41444
15	1245827	651775	0.523167	734.869	95.052	0.129345	4.04472
16	827035	341909	0.413415	1247.48	95.052	0.0761951	5.42575
17	1243762	320557	0.257732	1166.67	95.052	0.081473	3.1634
18	857506	376621	0.439205	846.058	95.052	0.112347	3.90937
19	1412372	602295	0.426442	532.977	95.052	0.178342	2.39115
20	1347929	528941	0.39241	1026.18	95.052	0.0926266	4.23647
21	986547	379451	0.384625	800.454	95.052	0.118748	3.23901
22	1208347	604767	0.500491	666.378	95.052	0.14264	3.50877
23	1103199	562334	0.50973	1547.21	95.052	0.0614345	8.29713
24	1111969	277722	0.249757	797.586	95.052	0.119175	2.09572
25	2073526	499020	0.240663	1530.36	95.052	0.0621107	3.87473
26	1251371	560871	0.448205	692.14	95.052	0.137331	3.2637
27	917975	261372	0.284727	546.764	95.052	0.173845	1.63782
28	1426544	448592	0.314461	790.05	95.052	0.120311	2.61372
29	1714717	293794	0.171337	1383.22	95.052	0.0687178	2.49334
30	1466037	451459	0.307945	1249.75	95.052	0.0760565	4.0489
		Average	0.316561			Average	3.65686

## Sheet: unNINL(1-1062)_Ctrl_+EtOH
Set	Whole Cell Integrated Density	Centrosome Integrated Density	Percent Of Total Flourescence at Centrsome	Whole Cell Area	Centrosome Area	Percent of Total Area at Centrosome	Normalized Peroxisome Flourescence at Centrosome
NINL(1-1062)_No Infection_+EtOH (REP. 1)
1	2623372	234380	0.089343	772.259	95.052	0.123083	0.725876
2	2769864	105156	0.0379643	2159.32	95.052	0.0440194	0.862444
3	3303931	184804	0.0559346	2096.09	95.052	0.0453474	1.23347
4	2827723	164636	0.0582221	914.016	95.052	0.103994	0.559862
5	3304053	257395	0.0779028	2325.31	95.052	0.0408772	1.90578
6	1539008	240611	0.156342	1048.86	95.052	0.0906242	1.72516
7	1058068	83601	0.0790129	791.96	95.052	0.120021	0.658324
8	515136	100985	0.196036	1403.79	95.052	0.0677109	2.89519
9	2747451	82939	0.0301876	1394.05	95.052	0.0681842	0.442736
10	1352844	116179	0.0858776	663.499	95.052	0.143259	0.599458
11	1948673	240808	0.123575	1459.49	95.052	0.0651268	1.89746
12	1753325	85931	0.0490103	1424.38	95.052	0.066732	0.734435
13	1932872	174570	0.0903164	1974.57	95.052	0.048138	1.8762
14	950662	184276	0.19384	680.762	95.052	0.139626	1.38828
15	943570	175749	0.18626	700.996	95.052	0.135596	1.37364
16	3272444	95003	0.0290312	641.198	95.052	0.148241	0.195838
17	905250	142841	0.157792	2238.7	95.052	0.0424586	3.71637
18	615501	136058	0.221052	929.395	95.052	0.102273	2.1614
19	1024802	263621	0.257241	1082.91	95.052	0.0877742	2.93071
20	3066436	249053	0.081219	1306.47	95.052	0.0727546	1.11634
21	2668796	161638	0.0605659	2376.39	95.052	0.0399984	1.51421
22	977067	155314	0.158959	644.268	95.052	0.147535	1.07744
23	3284534	115169	0.035064	1616.72	95.052	0.0587932	0.596396
24	2899940	89736	0.0309441	833.147	95.052	0.114088	0.27123
25	2550407	156233	0.0612581	1705.17	95.052	0.0557433	1.09893
26	2095403	153591	0.073299	1609.72	95.052	0.0590487	1.24133
27	2755474	293179	0.106399	2166.72	95.052	0.0438691	2.42537
28	1061090	75175	0.070847	1954.91	95.052	0.0486222	1.45709
29	1400692	178871	0.127702	621.873	95.052	0.152848	0.835483
30	540494	97065	0.179586	705.494	95.052	0.134731	1.33292
		Average	0.112531			Average	1.43594
NINL(1-1062)_No Infection_+EtOH (REP. 2)
1	1876850	143276	0.0763385	899.605	95.052	0.10566	0.722495
2	674496	81794	0.121267	1648.24	95.052	0.0576687	2.10282
3	2971233	154365	0.0519532	654.722	95.052	0.145179	0.357855
4	2108718	131203	0.0622193	1056.49	95.052	0.0899698	0.691558
5	1663421	106708	0.0641497	757.616	95.052	0.125462	0.511308
6	1204303	175849	0.146017	1374.32	95.052	0.0691631	2.1112
7	1927798	106335	0.0551588	661.202	95.052	0.143756	0.383696
8	666223	136739	0.205245	806.521	95.052	0.117854	1.74151
9	1433814	125441	0.0874876	1441.06	95.052	0.0659596	1.32638
10	2868969	234980	0.081904	1352.5	95.052	0.0702789	1.16541
11	893526	135012	0.1511	2390.67	95.052	0.0397595	3.80035
12	2058484	175782	0.0853939	589.753	95.052	0.161173	0.529829
13	2372120	196323	0.0827627	2307.9	95.052	0.0411854	2.00951
14	1660421	218071	0.131335	1987.11	95.052	0.0478343	2.74562
15	3283764	148976	0.0453675	563.295	95.052	0.168743	0.268856
16	767871	86051	0.112064	1265.2	95.052	0.075128	1.49165
17	1506005	125752	0.0835004	2114.34	95.052	0.0449558	1.85739
18	2216806	111401	0.0502529	1173.92	95.052	0.0809697	0.620638
19	3094859	175141	0.0565909	1429.43	95.052	0.0664966	0.851036
20	2869412	276276	0.0962831	905.865	95.052	0.10493	0.917598
21	2347772	125766	0.0535682	952.774	95.052	0.0997634	0.536953
22	2658015	129059	0.0485547	1218.21	95.052	0.0780258	0.62229
23	2309354	208205	0.0901572	700.276	95.052	0.135735	0.664215
24	2075160	86360	0.0416161	877.471	95.052	0.108325	0.384178
25	1835794	129010	0.0702748	2062.43	95.052	0.0460874	1.52481
26	2444993	96510	0.0394725	1817.01	95.052	0.0523123	0.754555
27	1180435	168137	0.142436	646.664	95.052	0.146988	0.969033
28	1074059	125205	0.116572	1839.73	95.052	0.0516663	2.25624
		Average	0.0860225			Average	1.19757
NINL(1-1062)_No Infection_+EtOH (REP. 3)
1	1614154	157431	0.0975316	2244.19	95.052	0.0423546	2.30274
2	2948772	126925	0.0430433	576.017	95.052	0.165016	0.260843
3	906926	189256	0.208679	865.552	95.052	0.109817	1.90024
4	2282438	165591	0.0725501	1561.17	95.052	0.0608852	1.19159
5	599148	131559	0.219577	844.12	95.052	0.112605	1.94998
6	3042363	193569	0.0636246	2270.17	95.052	0.0418699	1.51958
7	760939	218265	0.286836	1462.74	95.052	0.0649824	4.41407
8	1653561	136533	0.0825691	747.722	95.052	0.127122	0.649526
9	1141086	105851	0.0927634	2382.85	95.052	0.03989	2.32548
10	1813758	110729	0.0610495	1768.46	95.052	0.0537486	1.13583
11	813073	86500	0.106387	616.525	95.052	0.154174	0.690042
12	2724507	267301	0.0981099	2136.97	95.052	0.0444799	2.20571
13	1024446	160862	0.157023	2241.51	95.052	0.0424054	3.70291
14	3146566	277846	0.0883013	1187.19	95.052	0.0800644	1.10288
15	2079345	294901	0.141824	2080.22	95.052	0.0456931	3.10384
16	1291243	222150	0.172044	1368.66	95.052	0.0694488	2.47727
17	1125003	98762	0.0877882	1656.32	95.052	0.0573875	1.52975
18	2296759	222006	0.0966606	639.089	95.052	0.148731	0.649904
19	2407425	176855	0.0734623	2049.8	95.052	0.0463713	1.58422
20	2728708	205239	0.0752147	1167.33	95.052	0.0814268	0.92371
21	2857351	176800	0.0618755	630.495	95.052	0.150758	0.41043
22	2856978	152205	0.0532748	1207.26	95.052	0.0787337	0.676646
23	3026891	194001	0.0640925	2209.31	95.052	0.0430235	1.48971
24	3069365	73034	0.0237945	1578.61	95.052	0.0602123	0.395177
25	1208520	188508	0.155983	644.004	95.052	0.147595	1.05683
26	533668	103893	0.194677	722.139	95.052	0.131626	1.47902
27	519488	105822	0.203704	730.405	95.052	0.130136	1.56532
28	754564	80599	0.106815	652.381	95.052	0.1457	0.733118
29	2323699	241271	0.103831	1673.72	95.052	0.056791	1.82829
30	2303093	137870	0.059863	2091.13	95.052	0.0454547	1.31698
		Average	0.111765			Average	1.58596

## Sheet: unNINL(1-1062)_Ctrl_+Rapalog
Set	Whole Cell Integrated Density	Centrosome Integrated Density	Percent Of Total Flourescence at Centrsome	Whole Cell Area	Centrosome Area	Percent of Total Area at Centrosome	Normalized Peroxisome Flourescence at Centrosome
NINL(1-1062)_No Infection_+EtOH (REP. 1)
1	1123618	462084	0.411247	1715.2	95.052	0.0554176	7.42087
2	1456326	414859	0.284867	944.211	95.052	0.100668	2.82976
3	1515596	589926	0.389237	1117.96	95.052	0.085023	4.57802
4	1507864	450762	0.298941	1195.54	95.052	0.0795052	3.76001
5	657025	195564	0.297651	1715.46	95.052	0.0554089	5.37189
6	1609754	543837	0.337839	1753.48	95.052	0.0542076	6.23231
7	968250	509141	0.525836	870.367	95.052	0.109209	4.81495
8	766121	311552	0.406662	998.159	95.052	0.0952273	4.27043
9	745862	264499	0.354622	874.921	95.052	0.108641	3.26417
10	906512	171901	0.189629	1989.13	95.052	0.0477857	3.96832
11	1216085	606603	0.498816	853.065	95.052	0.111424	4.47673
12	1427429	519067	0.363638	2097.12	95.052	0.0453251	8.02288
13	1637711	415664	0.253808	1404.61	95.052	0.0676716	3.75058
14	525562	137391	0.261417	723.707	95.052	0.13134	1.99038
15	496244	230833	0.46516	1038.52	95.052	0.0915265	5.08225
16	487985	179666	0.368179	617.522	95.052	0.153925	2.39194
17	1336581	426351	0.318986	869.884	95.052	0.10927	2.91925
18	897655	519300	0.578507	532.618	95.052	0.178462	3.24163
19	1066427	137049	0.128512	680.591	95.052	0.139661	0.920174
20	1135184	374642	0.330028	1570.17	95.052	0.0605362	5.45174
21	1167028	361171	0.309479	1088.93	95.052	0.0872896	3.54543
22	1327884	422462	0.318147	1908.4	95.052	0.0498073	6.38756
23	1546656	393789	0.254607	2096.27	95.052	0.0453434	5.61508
24	1220848	491233	0.40237	1432.19	95.052	0.0663681	6.06271
25	884004	199509	0.225688	1967.78	95.052	0.0483042	4.67222
26	1209872	140976	0.116521	1264.36	95.052	0.075178	1.54994
27	513472	147308	0.286886	1796.08	95.052	0.0529219	5.42094
28	1663427	292758	0.175997	1921.17	95.052	0.0494761	3.55721
		Average	0.326903			Average	4.34176
NINL(1-1062)_No Infection_+EtOH (REP. 2)
1	646278	245286	0.379536	1810.68	95.052	0.0524952	7.22993
2	1585538	471296	0.297247	1435.14	95.052	0.0662317	4.48798
3	952770	285558	0.299713	1884.3	95.052	0.0504442	5.94148
4	1145932	523391	0.456738	1987.98	95.052	0.0478134	9.55251
5	505270	153171	0.303147	1370.08	95.052	0.0693771	4.36955
6	1459623	244717	0.167658	798.711	95.052	0.119007	1.40881
7	961740	189859	0.197412	780.715	95.052	0.12175	1.62145
8	676754	151790	0.224291	726.101	95.052	0.130907	1.71336
9	1432615	280069	0.195495	524.518	95.052	0.181218	1.07878
10	1100157	401827	0.365245	1088.39	95.052	0.0873329	4.18222
11	943760	359163	0.380566	1664.94	95.052	0.0570904	6.66603
12	499645	241891	0.484126	1245.7	95.052	0.0763042	6.34468
13	963023	194466	0.201933	1109.31	95.052	0.0856859	2.35666
14	855487	280930	0.328386	1252.78	95.052	0.0758731	4.3281
15	1041932	269902	0.25904	1552.44	95.052	0.0612274	4.23078
16	1426075	138255	0.0969479	1851.69	95.052	0.0513325	1.88863
17	483909	226404	0.467865	1825.79	95.052	0.0520609	8.98688
18	1034467	359150	0.347184	1252.46	95.052	0.0758922	4.57469
19	1502992	525693	0.349764	653.427	95.052	0.145467	2.40442
20	1160194	447023	0.3853	1425.16	95.052	0.0666958	5.77697
21	1426071	475343	0.333324	1858.56	95.052	0.0511428	6.51751
22	1582663	260317	0.16448	1520.09	95.052	0.0625304	2.63041
23	1333327	601593	0.451197	1709.79	95.052	0.0555927	8.11612
24	656893	259409	0.394903	1387.5	95.052	0.0685061	5.76449
25	1679915	330569	0.196777	863.401	95.052	0.11009	1.78742
26	602107	286498	0.475826	1138.81	95.052	0.0834661	5.70083
27	631055	265491	0.42071	2092.49	95.052	0.0454252	9.26159
28	1160399	451435	0.389034	516.385	95.052	0.184072	2.11349
29	740643	159365	0.215171	1175.13	95.052	0.0808866	2.66016
30	1026089	277069	0.270024	1029.7	95.052	0.0923102	2.92519
		Average	0.309131			Average	4.5584
NINL(1-1062)_No Infection_+EtOH (REP. 3)
1	983356	277378	0.282073	1689.75	95.052	0.0562522	5.01443
2	1131503	152266	0.13457	565.75	95.052	0.168011	0.800959
3	1677621	483586	0.288257	1136.79	95.052	0.0836147	3.44744
4	572522	168169	0.293734	1640.93	95.052	0.0579255	5.07089
5	1611430	258285	0.160283	1142.73	95.052	0.0831797	1.92695
6	813624	428673	0.526869	1790.63	95.052	0.053083	9.92538
7	1629112	399681	0.245337	824.246	95.052	0.11532	2.12744
8	758656	161991	0.213524	1438.26	95.052	0.066088	3.2309
9	836599	342575	0.409485	2051.45	95.052	0.0463341	8.83766
10	1520657	327173	0.215152	712.859	95.052	0.133339	1.61357
11	543282	200044	0.368214	1041.06	95.052	0.0913032	4.03287
12	1639257	398148	0.242883	1828.61	95.052	0.0519803	4.6726
13	1037384	387151	0.373199	616.33	95.052	0.154222	2.41988
14	1220325	567588	0.465112	1549.65	95.052	0.0613376	7.58283
15	1179571	232566	0.197162	1076	95.052	0.088338	2.2319
16	902099	285040	0.315974	1103.5	95.052	0.0861366	3.66829
17	1638093	356005	0.217329	1881.52	95.052	0.0505186	4.30195
18	652264	309555	0.474585	1652.95	95.052	0.0575045	8.25302
19	1285982	257404	0.200161	1988.44	95.052	0.0478022	4.18728
20	1302383	368109	0.282643	1138.64	95.052	0.0834789	3.3858
21	1514621	568314	0.375219	578.899	95.052	0.164194	2.28521
22	1088611	420183	0.385981	1656.27	95.052	0.0573893	6.72566
23	871757	502727	0.576682	1479.04	95.052	0.0642661	8.97336
24	959265	289911	0.302222	690.124	95.052	0.137732	2.19428
25	1371814	580598	0.423234	738.559	95.052	0.128699	3.28855
26	888036	495199	0.557634	520.632	95.052	0.18257	3.05435
27	1069520	545531	0.510071	1101.38	95.052	0.0863026	5.91026
28	1122293	398287	0.354887	1666.48	95.052	0.0570375	6.22199
29	802480	299683	0.373446	719.786	95.052	0.132056	2.82794
30	1654260	623319	0.376796	505.813	95.052	0.187919	2.0051
		Average	0.338091			Average	4.41347

## Sheet: NINL(1-1062)_3C_+EtOH
Set	Whole Cell Integrated Density	Centrosome Integrated Density	Percent Of Total Flourescence at Centrsome	Whole Cell Area	Centrosome Area	Percent of Total Area at Centrosome	Normalized Peroxisome Flourescence at Centrosome
NINL(1-1062)_No Infection_+EtOH (REP. 1)
1	2089495	188364	0.0901481	1622.44	95.052	0.0585858	1.53874
2	1981854	152974	0.0771873	1953.46	95.052	0.0486582	1.58632
3	2358963	181488	0.0769355	1763.03	95.052	0.053914	1.427
4	871556	100175	0.114938	1971.04	95.052	0.0482243	2.38341
5	791143	128262	0.162122	1772.78	95.052	0.0536174	3.02369
6	3007012	119209	0.0396437	1581.24	95.052	0.0601122	0.659494
7	3002409	122020	0.0406407	604.621	95.052	0.157209	0.258513
8	2565582	281091	0.109562	1861.42	95.052	0.0510641	2.14558
9	1540005	209202	0.135845	1995.29	95.052	0.0476381	2.8516
10	1731580	165346	0.0954885	1728.24	95.052	0.0549993	1.73618
11	3172395	306780	0.096703	1483.54	95.052	0.0640711	1.50931
12	3288198	181108	0.0550782	1267.15	95.052	0.0750124	0.734255
13	2755531	156431	0.0567698	1976.04	95.052	0.0481023	1.18019
14	2697304	215065	0.0797333	1835.39	95.052	0.0517885	1.5396
15	1016550	182294	0.179326	1102.1	95.052	0.0862459	2.07924
16	3150998	377922	0.119937	1325.01	95.052	0.0717367	1.67191
17	2926333	100327	0.0342842	1777.1	95.052	0.0534873	0.640979
18	2314096	235844	0.101916	2079.21	95.052	0.0457155	2.22936
19	1422959	69167	0.0486079	1912.58	95.052	0.0496984	0.978058
20	1617602	205119	0.126804	640.673	95.052	0.148363	0.854692
21	3275219	90789	0.02772	989.023	95.052	0.0961069	0.288428
22	895699	171081	0.191003	1051.53	95.052	0.0903936	2.11301
23	2315619	51179	0.0221016	2086.01	95.052	0.0455663	0.485044
24	1265482	71740	0.0566899	1481.66	95.052	0.0641524	0.883675
25	1753874	192636	0.109835	1820.63	95.052	0.0522083	2.10378
26	866173	75329	0.0869676	717.156	95.052	0.13254	0.65616
27	2713680	122762	0.0452382	1305.74	95.052	0.0727954	0.621443
28	2907728	462034	0.158899	995.711	95.052	0.0954614	1.66453
29	1789862	75919	0.0424161	913.882	95.052	0.104009	0.407812
		Average	0.0890532			Average	1.388
NINL(1-1062)_No Infection_+EtOH (REP. 2)
1	3120500	222895	0.0714293	881.133	95.052	0.107875	0.66215
2	1128733	214135	0.189713	1372.24	95.052	0.0692676	2.73884
3	1236024	105356	0.0852378	610.896	95.052	0.155594	0.547821
4	3063142	195423	0.0637982	534.74	95.052	0.177754	0.358913
5	2508940	117912	0.0469967	548.326	95.052	0.173349	0.27111
6	1853690	209821	0.113191	1478.67	95.052	0.0642821	1.76085
7	829354	147436	0.177772	847.622	95.052	0.11214	1.58527
8	1516851	208945	0.137749	1683.11	95.052	0.0564741	2.43916
9	3287248	391909	0.119221	1766.57	95.052	0.0538059	2.21576
10	2891071	566198	0.195844	762.202	95.052	0.124707	1.57043
11	1436581	64754	0.0450751	1398.47	95.052	0.0679683	0.663178
12	1376581	113968	0.0827906	1876.3	95.052	0.0506591	1.63427
13	2044531	207155	0.101322	1196.34	95.052	0.0794524	1.27525
14	2091929	467025	0.223251	1066.92	95.052	0.0890898	2.50591
15	1522787	189089	0.124173	698.444	95.052	0.136091	0.912425
16	1299263	53996	0.0415589	876.672	95.052	0.108424	0.383301
17	1951903	79162	0.0405563	1561.32	95.052	0.0608794	0.666175
18	2982288	215381	0.0722201	1435.92	95.052	0.0661959	1.091
19	2149284	186834	0.0869285	988.923	95.052	0.0961167	0.904406
20	2651297	223737	0.0843878	1877.31	95.052	0.0506321	1.66668
21	1695907	201648	0.118903	749.194	95.052	0.126872	0.937184
22	806871	95658	0.118554	1172.92	95.052	0.0810388	1.46293
23	2332011	193003	0.0827625	1255.46	95.052	0.0757109	1.09314
24	3076506	179442	0.0583266	1074.25	95.052	0.0884819	0.659192
25	1177215	84818	0.0720497	1252.3	95.052	0.0759019	0.949247
26	1371778	73645	0.0536858	770.993	95.052	0.123285	0.43546
27	2235640	170493	0.0762614	1703.3	95.052	0.0558045	1.36658
28	2190116	149186	0.0681179	1066.41	95.052	0.0891325	0.764231
29	1117447	231412	0.20709	1104.76	95.052	0.0860384	2.40695
30	1991370	208749	0.104827	559.383	95.052	0.169923	0.616908
		Average	0.102126			Average	1.21816
NINL(1-1062)_No Infection_+EtOH (REP. 3)
1	1687321	173393	0.102762	1751.7	95.052	0.0542626	1.8938
2	1942109	68081	0.0350552	942.308	95.052	0.100871	0.347523
3	2474392	100813	0.0407425	858.961	95.052	0.110659	0.36818
4	1432653	95328	0.0665395	531.588	95.052	0.178808	0.372129
5	3390620	254604	0.0750907	731.356	95.052	0.129967	0.577768
6	902890	123620	0.136916	1617.57	95.052	0.058762	2.33001
7	3259442	244626	0.0750515	782.645	95.052	0.12145	0.617963
8	2649010	198213	0.0748253	1679.86	95.052	0.0565835	1.32239
9	2753953	71407	0.0259289	811.905	95.052	0.117073	0.221477
10	936138	81678	0.08725	1398.88	95.052	0.0679486	1.28406
11	723175	50603	0.0699734	1667.59	95.052	0.0569998	1.22761
12	1889395	125882	0.0666256	1553.22	95.052	0.0611966	1.08871
13	3054382	254357	0.0832761	1168.21	95.052	0.0813652	1.02349
14	2738211	249208	0.0910112	832.308	95.052	0.114203	0.796925
15	2344833	200102	0.0853374	955.77	95.052	0.0994507	0.858088
16	2434587	61160	0.0251213	1807.51	95.052	0.0525874	0.477706
17	1901023	220060	0.115759	817.094	95.052	0.116329	0.995095
18	3154565	108988	0.0345493	1450.21	95.052	0.0655437	0.527119
19	3294302	253182	0.0768545	1285.24	95.052	0.0739565	1.03919
20	3258899	152734	0.0468667	520.188	95.052	0.182726	0.256486
21	951212	63388	0.0666392	1435.7	95.052	0.066206	1.00654
22	2734837	181475	0.0663568	624.464	95.052	0.152214	0.435945
23	1589808	203606	0.12807	969.109	95.052	0.0980818	1.30574
24	759785	132452	0.174328	2057.96	95.052	0.0461874	3.77437
25	1857610	151442	0.0815252	1097.09	95.052	0.0866398	0.940967
26	2647940	155237	0.0586256	1612.5	95.052	0.0589468	0.99455
27	3394790	237163	0.0698609	2038.58	95.052	0.0466267	1.4983
28	3377223	201952	0.0597982	1649.54	95.052	0.0576234	1.03774
29	1462710	186358	0.127406	1399.32	95.052	0.0679275	1.87562
30	2179622	165807	0.0760714	756.513	95.052	0.125645	0.605448
		Average	0.0774739			Average	1.02156

## Sheet: NINL(1-1062)_3C_+Rapalog
Set	Whole Cell Integrated Density	Centrosome Integrated Density	Percent Of Total Flourescence at Centrsome	Whole Cell Area	Centrosome Area	Percent of Total Area at Centrosome	Normalized Peroxisome Flourescence at Centrosome
NINL(1-1062)_No Infection_+EtOH (REP. 1)
1	475152	97951	0.206147	676.462	95.052	0.140513	1.4671
2	1163790	130766	0.112362	915.452	95.052	0.103831	1.08217
3	631848	104129	0.164801	484.584	95.052	0.196152	0.840169
4	672594	170686	0.253773	544.145	95.052	0.174681	1.45278
5	1783719	199604	0.111903	805.041	95.052	0.118071	0.947762
6	766246	170196	0.222117	827.454	95.052	0.114873	1.93359
7	1494034	94794	0.0634484	576.709	95.052	0.164818	0.38496
8	1751966	151210	0.0863088	938.47	95.052	0.101284	0.852146
9	1119697	136289	0.12172	879.829	95.052	0.108035	1.12667
10	1841299	163454	0.088771	866.736	95.052	0.109667	0.809462
11	1713428	150395	0.0877743	1424.49	95.052	0.066727	1.31542
12	910132	148465	0.163125	626.791	95.052	0.151649	1.07568
13	1558703	186893	0.119903	587.565	95.052	0.161773	0.741181
14	1938226	223056	0.115083	1030.68	95.052	0.0922225	1.24788
15	1789611	117405	0.0656036	680.175	95.052	0.139746	0.469448
16	1766627	109196	0.0618104	1125.27	95.052	0.0844706	0.731739
17	870773	203205	0.233362	784.554	95.052	0.121154	1.92615
18	1313539	210619	0.160345	1009.44	95.052	0.0941628	1.70285
19	648110	138699	0.214005	1469.82	95.052	0.0646692	3.30923
20	833126	183244	0.219948	1366.09	95.052	0.0695798	3.16108
21	413208	100839	0.244039	1271.66	95.052	0.0747465	3.26489
22	1645022	82136	0.04993	1447.99	95.052	0.0656439	0.760619
23	1062858	140291	0.131994	1364.57	95.052	0.0696572	1.89491
24	680904	126118	0.185221	706.201	95.052	0.134596	1.37613
25	1405553	95822	0.0681739	880.832	95.052	0.107912	0.631757
26	791185	128779	0.162767	1067.91	95.052	0.0890073	1.8287
27	1533561	173559	0.113174	727.615	95.052	0.130635	0.866337
28	966739	212429	0.219738	638.451	95.052	0.148879	1.47595
29	1999989	141677	0.0708389	1321.42	95.052	0.0719315	0.98481
30	649653	137134	0.211088	1253.65	95.052	0.07582	2.78407
		Average	0.144309			Average	1.41485
NINL(1-1062)_No Infection_+EtOH (REP. 2)
1	1607400	94033	0.0585001	879.977	95.052	0.108016	0.541585
2	1054374	225183	0.21357	630.587	95.052	0.150736	1.41685
3	429729	106921	0.24881	1014.88	95.052	0.0936581	2.65658
4	1197390	237166	0.198069	909.344	95.052	0.104528	1.89489
5	613449	70516	0.11495	1113.23	95.052	0.0853842	1.34627
6	651643	116651	0.179011	1226.63	95.052	0.0774905	2.3101
7	1625117	171623	0.105607	1104.67	95.052	0.0860457	1.22733
8	2007089	194440	0.0968766	1002.76	95.052	0.0947907	1.02201
9	549340	96768	0.176153	1282.87	95.052	0.0740931	2.37746
10	1348359	119618	0.0887138	1219.23	95.052	0.0779605	1.13793
11	1205866	183311	0.152016	1267.88	95.052	0.0749692	2.02771
12	1827188	204853	0.112114	1379.46	95.052	0.0689053	1.62707
13	1691912	236168	0.139586	974.302	95.052	0.0975591	1.43079
14	812539	140568	0.172998	1211.24	95.052	0.0784753	2.2045
15	1985705	102176	0.0514558	1478.35	95.052	0.0642959	0.800296
16	1510629	169106	0.111944	1177.97	95.052	0.0806912	1.38731
17	1845138	86979	0.0471396	1441.03	95.052	0.0659611	0.714657
18	1401767	130306	0.0929584	1278.14	95.052	0.0743672	1.24999
19	1277763	140121	0.109661	981.303	95.052	0.0968631	1.13213
20	1148797	237840	0.207034	1349.29	95.052	0.0704461	2.9389
21	1443285	206586	0.143136	720.533	95.052	0.131919	1.08503
22	475409	119152	0.250631	668.094	95.052	0.142273	1.76161
23	1032710	119185	0.11541	864.687	95.052	0.109927	1.04988
24	520830	160937	0.309001	853.992	95.052	0.111303	2.77621
25	1518286	149713	0.0986066	997.818	95.052	0.0952599	1.03513
26	1317888	238562	0.181018	773.592	95.052	0.122871	1.47324
27	1166196	176945	0.151728	956.738	95.052	0.0993501	1.52721
28	1061784	169797	0.159917	575.791	95.052	0.165081	0.968719
29	957371	168925	0.176447	658.667	95.052	0.14431	1.2227
30	1581339	204192	0.129126	599.432	95.052	0.15857	0.814314
		Average	0.146406			Average	1.50528
NINL(1-1062)_No Infection_+EtOH (REP. 3)
1	1519670	159922	0.105235	712.235	95.052	0.133456	0.788535
2	736351	161644	0.21952	1306.45	96.052	0.0735213	2.98581
3	444310	129791	0.292118	860.953	97.052	0.112726	2.59139
4	2000091	199821	0.099906	1188.86	98.052	0.0824758	1.21134
5	1796957	209983	0.116855	623.158	99.052	0.158952	0.73516
6	1992934	198791	0.0997479	1085.12	100.052	0.092204	1.08182
7	407694	67276	0.165016	653.119	101.052	0.154722	1.06653
8	1240383	120159	0.0968725	915.674	102.052	0.11145	0.8692
9	1625751	122382	0.0752772	1257.51	103.052	0.0819495	0.91858
10	1707728	228670	0.133903	1442.43	104.052	0.0721368	1.85624
11	1280964	163044	0.127282	939.992	105.052	0.111758	1.13891
12	645579	96603	0.149638	729.048	106.052	0.145466	1.02868
13	1890292	240785	0.12738	1474.21	107.052	0.0726164	1.75415
14	1169984	119248	0.101923	1423.97	108.052	0.0758807	1.3432
15	1249259	159713	0.127846	848.819	109.052	0.128475	0.995106
16	1197292	152336	0.127234	1112	110.052	0.0989678	1.28561
17	1233298	122889	0.0996426	1108.29	111.052	0.100201	0.994424
18	1165255	208390	0.178836	956.407	112.052	0.117159	1.52644
19	904991	90759	0.100287	1001.68	113.052	0.112862	0.888583
20	853194	158332	0.185576	967.556	114.052	0.117876	1.57432
21	1900889	73388	0.0386072	540.91	115.052	0.212701	0.181509
22	1980459	71528	0.0361169	765.804	116.052	0.151543	0.238328
23	1079207	143454	0.132925	1098.43	117.052	0.106563	1.24739
24	1898220	238897	0.125853	1082.23	118.052	0.109082	1.15375
25	571357	174592	0.305574	1395.37	119.052	0.0853193	3.58154
26	1857017	190804	0.102748	653.994	120.052	0.183568	0.559726
27	1189782	202589	0.170274	511.202	121.052	0.236799	0.719066
28	429561	127484	0.296777	1286.88	122.052	0.0948436	3.12913
29	1109922	108134	0.0974249	1502.82	123.052	0.0818809	1.18984
30	1829888	245164	0.133978	1292.91	124.052	0.0959477	1.39636
		Average	0.139012			Average	1.33435

## Sheet: unNINL(1-1062)_3C_+EtOH
Set	Whole Cell Integrated Density	Centrosome Integrated Density	Percent Of Total Flourescence at Centrsome	Whole Cell Area	Centrosome Area	Percent of Total Area at Centrosome	Normalized Peroxisome Flourescence at Centrosome
NINL(1-1062)_No Infection_+EtOH (REP. 1)
1	1410472	60430	0.0428438	1789.6	95.052	0.0531135	0.806646
2	757517	91524	0.120821	1140.49	95.052	0.0833428	1.44969
3	2641879	306705	0.116094	1007.9	95.052	0.0943065	1.23102
4	1156091	204027	0.17648	1208.36	95.052	0.0786621	2.24352
5	2067758	175605	0.0849253	1040.83	95.052	0.0913233	0.929941
6	2200393	279640	0.127086	1265.93	95.052	0.075085	1.69257
7	2068187	192109	0.0928876	844.071	96.052	0.113796	0.816264
8	3041760	175356	0.0576495	1474.74	97.052	0.0658095	0.876006
9	1668338	207656	0.124469	659.061	98.052	0.148775	0.836622
10	1006700	229692	0.228163	939.154	99.052	0.105469	2.16331
11	1200262	252693	0.210532	1796.04	100.052	0.055707	3.77926
12	2752309	164947	0.0599304	1419.42	101.052	0.0711924	0.841809
13	2889520	131391	0.0454716	1810.91	102.052	0.0563541	0.806891
14	1232995	110614	0.0897116	1545.54	103.052	0.0666771	1.34546
15	2271443	204063	0.0898385	1276.34	104.052	0.0815235	1.10199
16	2457085	135686	0.0552223	834.182	105.052	0.125934	0.438502
17	902670	179598	0.198963	1434.46	106.052	0.0739315	2.69118
18	2609368	493013	0.18894	1191.67	107.052	0.0898337	2.10322
19	2659064	126738	0.0476626	1460.37	108.052	0.0739893	0.644183
20	3160164	220035	0.0696277	1137.79	109.052	0.0958452	0.72646
21	2609696	294052	0.112677	1806.68	110.052	0.0609139	1.84977
22	1504326	126457	0.0840622	1224.55	111.052	0.0906878	0.926941
23	3087550	185676	0.060137	1233.68	112.052	0.0908274	0.662102
24	3216034	120446	0.0374517	819.505	113.052	0.137952	0.271484
25	825691	146259	0.177135	1392.72	114.052	0.0818918	2.16304
26	2067874	154072	0.0745074	1873.51	115.052	0.0614099	1.21328
27	2565518	237865	0.0927162	1763.86	116.052	0.0657943	1.40918
28	1690155	235169	0.13914	1141.08	117.052	0.10258	1.35641
29	1245406	192612	0.154658	1042.75	118.052	0.113212	1.36609
30	1524407	215874	0.141612	1370.89	119.052	0.0868427	1.63067
		Average	0.107327			Average	1.33488
NINL(1-1062)_No Infection_+EtOH (REP. 2)
1	1536129	237886	0.154861	955.4	95.052	0.0994893	1.55656
2	2647457	422368	0.159537	1122.46	95.052	0.0846819	1.88396
3	2250278	127315	0.0565775	1620.68	95.052	0.0586495	0.96467
4	3234378	166983	0.0516275	1910.97	95.052	0.0497402	1.03794
5	2551006	223569	0.0876395	686.486	95.052	0.138462	0.632951
6	3347685	169058	0.0505	1336.86	95.052	0.0711009	0.710257
7	2534062	213023	0.0840638	1103.24	95.052	0.0861574	0.975701
8	2886054	191700	0.0664229	1779.67	95.052	0.05341	1.24364
9	1642436	236961	0.144274	672.818	95.052	0.141274	1.02123
10	1248742	59667	0.0477817	1916.82	95.052	0.0495883	0.963568
11	3172457	490840	0.154719	1236.51	95.052	0.0768713	2.0127
12	3334963	233798	0.0701051	1123.71	95.052	0.0845878	0.828786
13	2452976	99037	0.0403742	1600.99	95.052	0.0593709	0.680034
14	2959901	202888	0.0685455	815.026	95.052	0.116624	0.587746
15	1708367	96115	0.0562613	1303.06	95.052	0.072945	0.771284
16	1696018	199630	0.117705	1373.23	95.052	0.0692178	1.7005
17	3384859	235352	0.0695308	1497.75	95.052	0.0634632	1.09561
18	2843489	97527	0.0342984	1155.68	95.052	0.0822478	0.417012
19	2274196	116211	0.0510998	1691.31	95.052	0.0562002	0.909247
20	1444598	97626	0.06758	1804.61	95.052	0.0526717	1.28304
21	1162155	67789	0.0583304	1499.08	95.052	0.0634067	0.919941
22	3002896	137859	0.0459087	1467.25	95.052	0.0647824	0.70866
23	1043669	103224	0.0989049	1781.52	95.052	0.0533545	1.85373
24	873854	195559	0.223789	1775.37	95.052	0.0535392	4.17991
25	3381812	168033	0.0496873	1349.58	95.052	0.0704308	0.705476
26	3035000	238097	0.0784504	754.69	95.052	0.125948	0.622878
27	2578977	90312	0.0350185	1239.72	95.052	0.0766723	0.45673
28	837803	164076	0.195841	1277.28	95.052	0.0744176	2.63165
29	3150394	130233	0.0413386	949.425	95.052	0.100115	0.41291
30	1824493	92027	0.0504398	887.135	95.052	0.107145	0.470762
		Average	0.084405			Average	1.18577
NINL(1-1062)_No Infection_+EtOH (REP. 3)
1	2386563	268506	0.112507	1288.94	95.052	0.0737442	1.52564
2	2770341	360158	0.130005	1773.92	95.052	0.0535831	2.42623
3	2561498	212874	0.0831053	1719.5	95.052	0.055279	1.50338
4	2340300	93308	0.0398701	1178.27	95.052	0.0806705	0.494234
5	1957842	249639	0.127507	873.387	95.052	0.108832	1.1716
6	1330262	135228	0.101655	1137.18	95.052	0.083586	1.21617
7	3237657	510837	0.15778	744.767	95.052	0.127627	1.23626
8	3392260	153717	0.045314	1534.28	95.052	0.061952	0.731437
9	1954070	54203	0.0277385	1689.23	95.052	0.0562696	0.492958
10	1543712	138441	0.0896806	1428.99	95.052	0.0665168	1.34824
11	3019031	235919	0.0781439	1740.55	95.052	0.0546102	1.43094
12	1857154	150061	0.0808016	1712.43	95.052	0.0555069	1.4557
13	815371	171897	0.210821	1485.65	95.052	0.0639801	3.2951
14	1973308	165231	0.083733	709.496	95.052	0.133971	0.625007
15	983912	224930	0.228608	891.045	95.052	0.106675	2.14304
16	3066586	219093	0.0714452	1129.72	95.052	0.0841375	0.849148
17	1960807	190862	0.0973385	1831.42	95.052	0.0519007	1.87548
18	1672458	123593	0.073899	1549.97	95.052	0.0613251	1.20504
19	1926339	196977	0.102255	1501.92	95.052	0.0632872	1.61572
20	2790814	241851	0.0866597	1864.31	95.052	0.0509851	1.69971
21	3234457	207212	0.0640639	1528.88	95.052	0.0621709	1.03045
22	3305419	195879	0.05926	1710.51	95.052	0.0555695	1.06641
23	1271770	214079	0.168332	687.084	95.052	0.138341	1.21679
24	2057863	374413	0.181943	1875.44	95.052	0.0506826	3.58984
25	2209891	135481	0.0613066	1126.93	95.052	0.0843463	0.726844
26	3100825	470782	0.151825	1330.74	95.052	0.0714279	2.12557
27	1819125	227818	0.125235	1321	95.052	0.0719543	1.74048
28	2268323	190129	0.0838192	1233.12	95.052	0.0770824	1.0874
29	1268918	259545	0.20454	1097.59	95.052	0.0866003	2.36189
30	1014422	130792	0.128933	1673.49	95.052	0.0567988	2.26999
		Average	0.108604			Average	1.51856

## Sheet: unNINL(1-1062)_3C_+Rapalog
Set	Whole Cell Integrated Density	Centrosome Integrated Density	Percent Of Total Flourescence at Centrsome	Whole Cell Area	Centrosome Area	Percent of Total Area at Centrosome	Normalized Peroxisome Flourescence at Centrosome
NINL(1-1062)_No Infection_+EtOH (REP. 1)
1	738983	267519	0.36201	1041.49	95.052	0.0912654	3.96656
2	822980	368995	0.448364	1272.83	95.052	0.0746779	6.00398
3	936974	326762	0.348742	1743.21	95.052	0.0545271	6.39575
4	1008813	377286	0.37399	1346.96	95.052	0.0705677	5.29973
5	614274	271706	0.442321	1384.48	95.052	0.0686556	6.4426
6	1498613	554904	0.370278	1757.84	95.052	0.0540731	6.84774
7	798883	262867	0.329043	854.059	95.052	0.111294	2.95651
8	1353013	578415	0.427501	1275.3	95.052	0.0745333	5.73571
9	766205	132341	0.172723	1120.51	95.052	0.0848292	2.03612
10	1307509	240069	0.183608	1098.22	95.052	0.0865512	2.12138
11	1055657	532095	0.504042	945.713	95.052	0.100508	5.01493
12	1656110	591106	0.162919	1899.23	95.052	0.0500477	3.25527
13	1535871	250222	0.162919	1482.02	95.052	0.0641367	2.54018
14	845787	191909	0.2269	1872.56	95.052	0.0507605	4.47001
15	971585	411481	0.423515	1219.34	95.052	0.0779539	5.43289
16	1636513	382773	0.233895	930.852	95.052	0.102113	2.29056
17	613886	182338	0.297023	1839.33	95.052	0.0516775	5.74762
18	582644	115504	0.198241	1043.32	95.052	0.0911054	2.17595
19	1626344	411961	0.253305	1377	95.052	0.0690283	3.66958
20	675875	220663	0.326485	1378.28	95.052	0.0689643	4.73412
21	592815	196186	0.33094	794.679	95.052	0.119611	2.76681
22	690910	135169	0.195639	1276.8	95.052	0.0744455	2.62795
23	1038066	157539	0.151762	1689.22	95.052	0.0562697	2.69705
24	1637877	444424	0.354134	1881.18	95.052	0.0505278	7.0087
25	1273453	450973	0.354134	652.211	95.052	0.145738	2.42993
26	1049589	425111	0.405026	1307.43	95.052	0.0727016	5.57107
27	553957	220554	0.398143	733.858	95.052	0.129524	3.0739
28	579169	167296	0.288855	655.67	95.052	0.144969	1.99253
29	1373346	339313	0.24707	763.875	95.052	0.124434	1.98555
30	2040119	415481	0.203655	1446.92	95.052	0.0656927	3.10012
		Average	0.305906			Average	4.01303
NINL(1-1062)_No Infection_+EtOH (REP. 2)
1	836240	297515	0.355777	1908.41	95.052	0.0498069	7.14312
2	667167	250753	0.375847	768.552	95.052	0.123677	3.03895
3	708383	196480	0.277364	1550.91	95.052	0.0612879	4.52559
4	949663	288363	0.303648	1059.72	95.052	0.0896954	3.38532
5	1494527	399517	0.26732	802.657	95.052	0.118422	2.25736
6	714868	320428	0.448234	725.096	95.052	0.131089	3.41931
7	1567327	307165	0.19598	1689.63	95.052	0.0562563	3.4837
8	1597654	509882	0.319144	1321.08	95.052	0.0719503	4.43562
9	700576	308032	0.439684	1133.38	95.052	0.0838662	5.24268
10	694603	182995	0.263453	1665.66	95.052	0.0570657	4.61666
11	1103096	219888	0.199337	1864.48	95.052	0.0509805	3.91006
12	1222793	279482	0.22856	949.181	95.052	0.100141	2.28238
13	924362	484747	0.524413	1008.26	95.052	0.0942729	5.56271
14	1436481	548978	0.382169	1527.3	95.052	0.0622353	6.14071
15	856497	189661	0.221438	1913.6	95.052	0.0496718	4.45802
16	607621	101325	0.166757	1066.72	95.052	0.0891069	1.87143
17	1579133	277036	0.175436	1595.92	95.052	0.0595593	2.94556
18	1584503	496213	0.313166	1680.22	95.052	0.0565711	5.5358
19	829026	290533	0.350451	1378.76	95.052	0.0689402	5.08341
20	1391365	391589	0.281442	1889.05	95.052	0.0503173	5.59335
21	1601500	442693	0.276424	1591.17	95.052	0.0597373	4.62733
22	1284707	257704	0.200594	1548.27	95.052	0.0613924	3.2674
23	577884	206545	0.357416	1709.12	95.052	0.0556147	6.42665
24	1370367	500703	0.365379	1913.48	95.052	0.0496748	7.35541
25	1290236	291707	0.226088	1128.3	95.052	0.0842436	2.68374
26	940898	293954	0.312419	1159.79	95.052	0.0819561	3.81202
27	1133889	422560	0.372664	1342.85	95.052	0.0707836	5.26484
28	1172069	170205	0.145218	1516.1	95.052	0.0626952	2.31625
29	1214481	525035	0.432312	1900.1	95.052	0.0500248	8.64196
30	2657672	517161	0.194592	1318.27	95.052	0.0721034	2.69879
		Average	0.300621			Average	4.37169
NINL(1-1062)_No Infection_+EtOH (REP. 3)
1	1057395	156520	0.148024	1463.7	95.052	0.0649393	2.27942
2	1215372	154189	0.126866	1357.34	95.052	0.0700282	1.81164
3	678410	212667	0.313479	1476.64	95.052	0.0643706	4.86991
4	1041352	319163	0.306489	1093.21	95.052	0.0869477	3.52498
5	660360	259610	0.393134	828.181	95.052	0.114772	3.42535
6	691641	198067	0.286373	1782.87	95.052	0.0533141	5.37142
7	1520302	363713	0.239237	1607.97	95.052	0.0591131	4.04711
8	737838	258036	0.349719	1620.19	95.052	0.0586673	5.96106
9	888103	256265	0.288553	1515.86	95.052	0.0627048	4.60177
10	1222803	602498	0.492719	943.134	95.052	0.100783	4.8889
11	1309969	236495	0.180535	1855.15	95.052	0.0512369	3.52353
12	1618746	526962	0.325537	1284.89	95.052	0.0739766	4.40054
13	1231617	394335	0.320177	782.518	95.052	0.121469	2.63586
14	1381756	460914	0.333571	1841.18	95.052	0.0516257	6.46134
15	628271	193992	0.308771	750.801	95.052	0.126601	2.43894
16	1305109	571843	0.438157	1468.43	95.052	0.0647305	6.76895
17	1159386	458432	0.395409	717.584	95.052	0.132461	2.98509
18	1082286	355340	0.328324	1575.17	95.052	0.060344	5.44086
19	934729	454426	0.486158	1599.68	95.052	0.0594192	8.18183
20	783149	306485	0.39135	1450.84	95.052	0.065515	5.97343
21	1472219	545497	0.370527	1318.6	95.052	0.0720854	5.14011
22	1126384	158821	0.141001	1733.62	95.052	0.0548287	2.57166
23	875614	370948	0.423643	806.768	95.052	0.117818	3.59573
24	1148046	209802	0.182747	1016.72	95.052	0.0934893	1.95474
25	1513171	368576	0.243579	1283.24	95.052	0.0740717	3.28842
26	1596737	317094	0.198589	1428.23	95.052	0.0665524	2.98394
27	631852	311395	0.492829	1444.65	95.052	0.0657959	7.49027
28	1495520	272707	0.182349	1097.95	95.052	0.0865721	2.10633
29	606756	286798	0.472674	993.05	95.052	0.0957172	4.93824
30	2653783	527032	0.198596	1347.01	95.052	0.0705652	2.81437
		Average	0.311971			Average	4.31914
