# Supplementary material for: Antiviral function and viral antagonism of the rapidly evolving dynein activating adaptor NINL
Source: eLife. 2022 Oct 12;11:e81606. doi: 10.7554/eLife.81606 (PMC9651953; doi:10.7554/eLife.81606)
Supplement: Figure 7—source data 1. [file elife-81606-fig7-data1.xlsx]

## Sheet: NINL(1-1062)_Ctrl_+EtOH
Set	Name	Whole Cell Integrated Density	Centrosome Integrated Density	Percent Of Total Flourescence at Centrsome	Whole Cell Area	Centrosome Area	Percent of Total Area at Centrosome	Normalized Peroxisome Flourescence at Centrosome
NINL(1-1062)_No Infection_+EtOH (REP. 1)
1	C3-Max_NINL(1-1062)_No Infection_+EtOH_001_Cell 1	1.3246e+06	220557	0.166509	1051.42	95.052	0.0904032	1.84185
2	C3-Max_NINL(1-1062)_No Infection_+EtOH_001_Cell 2	1.47879e+06	169611	0.114695	1225.19	95.052	0.0775813	1.47839
3	C3-Max_NINL(1-1062)_No Infection_+EtOH_002_Cell 1	1.57974e+06	248631	0.157387	862.663	95.052	0.110184	1.4284
4	C3-Max_NINL(1-1062)_No Infection_+EtOH_003_Cell 1	1.88066e+06	103491	0.0550291	1340.41	95.052	0.0709126	0.776014
5	C3-Max_NINL(1-1062)_No Infection_+EtOH_003_Cell 2	844383	178623	0.211543	736.789	95.052	0.129008	1.63976
6	C3-Max_NINL(1-1062)_No Infection_+EtOH_003_Cell 3	873611	87100.5	0.0997016	1422.22	95.052	0.0668335	1.49179
7	C3-Max_NINL(1-1062)_No Infection_+EtOH_004_Cell 1	1.13091e+06	82985	0.0733789	930.759	95.052	0.102123	0.718534
8	C3-Max_NINL(1-1062)_No Infection_+EtOH_004_Cell 2	1.58384e+06	184737	0.116638	1160.02	95.052	0.08194	1.42346
9	C3-Max_NINL(1-1062)_No Infection_+EtOH_004_Cell 3	1.24574e+06	85964.3	0.0690068	1418.19	95.052	0.0670236	1.02959
10	C3-Max_NINL(1-1062)_No Infection_+EtOH_004_Cell 4	1.94171e+06	206279	0.106236	1245.96	95.052	0.0762879	1.39256
11	C3-Max_NINL(1-1062)_No Infection_+EtOH_004_Cell 5	1.28973e+06	170217	0.131978	660.526	95.052	0.143903	0.917131
12	C3-Max_NINL(1-1062)_No Infection_+EtOH_004_Cell 6	841541	84558.5	0.10048	941.548	95.052	0.100953	0.99532
13	C3-Max_NINL(1-1062)_No Infection_+EtOH_004_Cell 7	1.20428e+06	102280	0.0849305	994.418	95.052	0.0955856	0.888528
14	C3-Max_NINL(1-1062)_No Infection_+EtOH_005_Cell 1	1.98691e+06	303398	0.152698	1087.25	95.052	0.0874241	1.74664
15	C3-Max_NINL(1-1062)_No Infection_+EtOH_005_Cell 2	1.20383e+06	169283	0.14062	968.336	95.052	0.0981601	1.43256
16	C3-Max_NINL(1-1062)_No Infection_+EtOH_006_Cell 1	2.14606e+06	317360	0.147881	1641.13	95.052	0.0579186	2.55325
17	C3-Max_NINL(1-1062)_No Infection_+EtOH_006_Cell 2	1.29617e+06	193816	0.14953	873.922	95.052	0.108765	1.3748
18	C3-Max_NINL(1-1062)_No Infection_+EtOH_007_Cell 1	3.4688e+06	115971	0.0334325	2843.84	95.052	0.0334239	1.00026
19	C3-Max_NINL(1-1062)_No Infection_+EtOH_008_Cell 1	2.09657e+06	209072	0.0997209	1294.4	95.052	0.0734334	1.35798
20	C3-Max_NINL(1-1062)_No Infection_+EtOH_008_Cell 2	2.35565e+06	262067	0.11125	1140.73	95.052	0.0833258	1.33512
21	C3-Max_NINL(1-1062)_No Infection_+EtOH_008_Cell 3	1.61872e+06	220788	0.136397	1168.89	95.052	0.0813179	1.67733
22	C3-Max_NINL(1-1062)_No Infection_+EtOH_008_Cell 4	1.38676e+06	150352	0.10842	1072.8	95.052	0.0886019	1.22368
23	C3-Max_NINL(1-1062)_No Infection_+EtOH_009_Cell 1	1.76786e+06	157493	0.0890869	1235.71	95.052	0.0769208	1.15816
24	C3-Max_NINL(1-1062)_No Infection_+EtOH_009_Cell 2	927796	138386	0.149156	715.984	95.052	0.132757	1.12352
25	C3-Max_NINL(1-1062)_No Infection_+EtOH_009_Cell 3	3.00157e+06	235803	0.0785599	920.575	95.052	0.103253	0.76085
26	C3-Max_NINL(1-1062)_No Infection_+EtOH_009_Cell 4	1.79482e+06	81796.2	0.0455735	1970.05	95.052	0.0482486	0.944556
27	C3-Max_NINL(1-1062)_No Infection_+EtOH_010_Cell 1	1.05647e+06	115398	0.109229	810.498	95.052	0.117276	0.931385
28	C3-Max_NINL(1-1062)_No Infection_+EtOH_010_Cell 2	985221	106972	0.108577	877.183	95.052	0.108361	1.002
			Average	0.112416			Average	1.27298
NINL(1-1062)_No Infection_+EtOH (REP. 2)
1	C3-Max_Rep 2 NINL(1-1062)_No Infection_+EtOH_001_Cell 1	1.9971e+06	150761	0.07549	1516.67	95.052	0.0626716	1.20453
2	C3-Max_Rep 2 NINL(1-1062)_No Infection_+EtOH_001_Cell 2	1.50307e+06	125493	0.0834911	1148.09	95.052	0.0827916	1.00845
3	C3-Max_Rep 2 NINL(1-1062)_No Infection_+EtOH_001_Cell 3	1.18703e+06	186948	0.157492	791.945	95.052	0.120023	1.31218
4	C3-Max_Rep 2 NINL(1-1062)_No Infection_+EtOH_001_Cell 4	2.2778e+06	145370	0.0638205	1618.71	95.052	0.0587208	1.08685
5	C3-Max_Rep 2 NINL(1-1062)_No Infection_+EtOH_001_Cell 5	2.86355e+06	195856	0.068396	1436.07	95.052	0.0661891	1.03334
6	C3-Max_Rep 2 NINL(1-1062)_No Infection_+EtOH_002_Cell 1	1.85415e+06	109609	0.0591156	2057.54	95.052	0.046197	1.27964
7	C3-Max_Rep 2 NINL(1-1062)_No Infection_+EtOH_002_Cell 2	704828	61250.3	0.086901	1278.26	95.052	0.0743602	1.16865
8	C3-Max_Rep 2 NINL(1-1062)_No Infection_+EtOH_002_Cell 3	1.26195e+06	92920	0.0736319	1763.07	95.052	0.0539127	1.36576
9	C3-Max_Rep 2 NINL(1-1062)_No Infection_+EtOH_002_Cell 4	1.47673e+06	40496.2	0.0768281	2021.24	95.052	0.0470266	1.63372
10	C3-Max_Rep 2 NINL(1-1062)_No Infection_+EtOH_003_Cell 1	1.50807e+06	113454	0.0778095	1789.36	95.052	0.0531208	1.46477
11	C3-Max_Rep 2 NINL(1-1062)_No Infection_+EtOH_003_Cell 2	2.45457e+06	117342	0.0534152	1134.21	95.052	0.0838048	0.637376
12	C3-Max_Rep 2 NINL(1-1062)_No Infection_+EtOH_003_Cell 3	2.88461e+06	131112	0.0835235	2062.95	95.052	0.0460758	1.81274
13	C3-Max_Rep 2 NINL(1-1062)_No Infection_+EtOH_004_Cell 1	1.80674e+06	240933	0.13752	1121.9	95.052	0.0847238	1.62316
14	C3-Max_Rep 2 NINL(1-1062)_No Infection_+EtOH_004_Cell 2	1.61508e+06	248463	0.162993	787.038	95.052	0.120772	1.3496
15	C3-Max_Rep 2 NINL(1-1062)_No Infection_+EtOH_006_Cell 1	1.34392e+06	263247	0.12422	745.898	95.052	0.127433	0.97479
16	C3-Max_Rep 2 NINL(1-1062)_No Infection_+EtOH_006_Cell 2	1.64789e+06	166942	0.0672296	751.914	95.052	0.126413	0.531824
17	C3-Max_Rep 2 NINL(1-1062)_No Infection_+EtOH_007_Cell 1	1.53229e+06	110787	0.0723014	1803.67	95.052	0.0526991	1.37197
18	C3-Max_Rep 2 NINL(1-1062)_No Infection_+EtOH_007_Cell 2	2.75124e+06	114835	0.0417395	2036.93	95.052	0.0466643	0.894463
19	C3-Max_Rep 2 NINL(1-1062)_No Infection_+EtOH_007_Cell 3	2.40505e+06	134596	0.0559638	1114.91	95.052	0.085255	0.656428
20	C3-Max_Rep 2 NINL(1-1062)_No Infection_+EtOH_008_Cell 1	1.76407e+06	105641	0.0598849	1944.17	95.052	0.0488909	1.22487
21	C3-Max_Rep 2 NINL(1-1062)_No Infection_+EtOH_008_Cell 2	1.26977e+06	123874	0.097556	1341.29	95.052	0.0708664	1.37662
22	C3-Max_Rep 2 NINL(1-1062)_No Infection_+EtOH_008_Cell 3	800685	82718.6	0.10331	982.856	95.052	0.09671	1.06824
23	C3-Max_Rep 2 NINL(1-1062)_No Infection_+EtOH_009_Cell 1	3.96492e+06	166826	0.0420756	3526.75	95.052	0.0269517	1.56114
24	C3-Max_Rep 2 NINL(1-1062)_No Infection_+EtOH_009_Cell 2	1.8233e+06	232774	0.127667	1211.51	95.052	0.0784573	1.62721
25	C3-Max_Rep 2 NINL(1-1062)_No Infection_+EtOH_010_Cell 1	1.63971e+06	135588	0.0826901	1298.97	95.052	0.073175	1.13003
			Average	0.0854026			Average	1.21593
NINL(1-1062)_No Infection_+EtOH (REP. 3)
1	C3-Max_Rep 3 NINL(1-1062)_No Infection_+EtOH_001_Cell 1	1.17052e+06	131730	0.11254	1005.85	95.052	0.0944996	1.1909
2	C3-Max_Rep 3 NINL(1-1062)_No Infection_+EtOH_001_Cell 2	1.70289e+06	183186	0.107573	901.988	95.052	0.105381	1.02081
3	C3-Max_Rep 3 NINL(1-1062)_No Infection_+EtOH_001_Cell 3	1.47035e+06	163339	0.111088	1380.88	95.052	0.0688344	1.61385
4	C3-Max_Rep 3 NINL(1-1062)_No Infection_+EtOH_001_Cell 4	1.69385e+06	163327	0.096424	920.507	95.052	0.10326	0.933794
5	C3-Max_Rep 3 NINL(1-1062)_No Infection_+EtOH_001_Cell 5	1.37278e+06	189112	0.137759	1055.19	95.052	0.0900807	1.52928
6	C3-Max_Rep 3 NINL(1-1062)_No Infection_+EtOH_002_Cell 1	1.3101e+06	111336	0.0849833	1221.87	95.052	0.0777926	1.09244
7	C3-Max_Rep 3 NINL(1-1062)_No Infection_+EtOH_002_Cell 2	1.17237e+06	232653	0.198447	600.261	95.052	0.158351	1.25321
8	C3-Max_Rep 3 NINL(1-1062)_No Infection_+EtOH_002_Cell 3	1.17406e+06	209442	0.178391	410.997	95.052	0.231272	0.771348
9	C3-Max_Rep 3 NINL(1-1062)_No Infection_+EtOH_002_Cell 4	2.29729e+06	147317	0.0641263	1212.55	95.052	0.0783899	0.818043
10	C3-Max_Rep 3 NINL(1-1062)_No Infection_+EtOH_002_Cell 5	1.1406e+06	161138	0.141274	972.504	95.052	0.0977394	1.44542
11	C3-Max_Rep 3 NINL(1-1062)_No Infection_+EtOH_002_Cell 6	1.52797e+06	243841	0.159585	850.059	95.052	0.111818	1.42718
12	C3-Max_Rep 3 NINL(1-1062)_No Infection_+EtOH_003_Cell 1	1.53232e+06	140984	0.0920068	1103.49	95.052	0.0861379	1.06813
13	C3-Max_Rep 3 NINL(1-1062)_No Infection_+EtOH_003_Cell 2	2.3685e+06	171812	0.0725406	1368.64	95.052	0.0694498	1.0445
14	C3-Max_Rep 3 NINL(1-1062)_No Infection_+EtOH_003_Cell 3	1.669e+06	147855	0.0885892	980.436	95.052	0.0969487	0.913774
15	C3-Max_Rep 3 NINL(1-1062)_No Infection_+EtOH_003_Cell 4	1.30737e+06	136591	0.104478	964.135	95.052	0.0985879	1.05975
16	C3-Max_Rep 3 NINL(1-1062)_No Infection_+EtOH_004_Cell 1	1.74189e+06	206062	0.118298	1024.16	95.052	0.0928094	1.27463
17	C3-Max_Rep 3 NINL(1-1062)_No Infection_+EtOH_004_Cell 2	2.02219e+06	231227	0.114345	1313.59	95.052	0.0723605	1.58021
18	C3-Max_Rep 3 NINL(1-1062)_No Infection_+EtOH_004_Cell 3	1.62816e+06	228990	0.140643	955.934	95.052	0.0994336	1.41444
19	C3-Max_Rep 3 NINL(1-1062)_No Infection_+EtOH_005_Cell 1	1.26601e+06	175620	0.138719	792.55	95.052	0.119932	1.15665
20	C3-Max_Rep 3 NINL(1-1062)_No Infection_+EtOH_005_Cell 2	1.76652e+06	281926	0.159594	671.718	95.052	0.141506	1.12782
21	C3-Max_Rep 3 NINL(1-1062)_No Infection_+EtOH_006_Cell 1	1.83955e+06	184071	0.100063	1009.68	95.052	0.0941409	1.06291
22	C3-Max_Rep 3 NINL(1-1062)_No Infection_+EtOH_006_Cell 2	2.34901e+06	179466	0.0764005	1494.65	95.052	0.0635947	1.20136
23	C3-Max_Rep 3 NINL(1-1062)_No Infection_+EtOH_006_Cell 3	1.43284e+06	189271	0.132095	797.625	95.052	0.119169	1.10847
24	C3-Max_Rep 3 NINL(1-1062)_No Infection_+EtOH_006_Cell 4	1.35773e+06	162338	0.119566	855.268	95.052	0.111137	1.07584
25	C3-Max_Rep 3 NINL(1-1062)_No Infection_+EtOH_007_Cell 1	2.70023e+06	324439	0.120152	1430.62	95.052	0.066441	1.80841
26	C3-Max_Rep 3 NINL(1-1062)_No Infection_+EtOH_007_Cell 2	1.14003e+06	125613	0.110184	858.562	95.052	0.110711	0.995243
27	C3-Max_Rep 3 NINL(1-1062)_No Infection_+EtOH_007_Cell 3	2.31268e+06	234011	0.101186	963.395	95.052	0.0986636	1.02557
28	C3-Max_Rep 3 NINL(1-1062)_No Infection_+EtOH_008_Cell 1	1.53085e+06	238962	0.156097	1035.69	95.052	0.0917762	1.70085
29	C3-Max_Rep 3 NINL(1-1062)_No Infection_+EtOH_008_Cell 2	1.51518e+06	327245	0.215978	850.361	95.052	0.111778	1.9322
30	C3-Max_Rep 3 NINL(1-1062)_No Infection_+EtOH_008_Cell 3	959033	116848	0.12184	760.787	95.052	0.124939	0.975194
31	C3-Max_Rep 3 NINL(1-1062)_No Infection_+EtOH_009_Cell 1	3.06551e+06	169896	0.0554216	1680.89	95.052	0.0565485	0.980072
32	C3-Max_Rep 3 NINL(1-1062)_No Infection_+EtOH_009_Cell 2	2.56703e+06	139765	0.0544463	1150.51	95.052	0.0826174	0.659018
			Average	0.118276			Average	1.19567
NINL(1-1062)_No Infection_+EtOH (REP. 3)

## Sheet: NINL(1-1062)_Ctrl_+Rapalog
Set	Name	Whole Cell Integrated Density	Centrosome Integrated Density	Percent Of Total Flourescence at Centrsome	Whole Cell Area	Centrosome Area	Percent of Total Area at Centrosome	Normalized Peroxisome Flourescence at Centrosome
NINL(1-1062)_No Infection_+EtOH (REP. 1)
1	NINL(1-1062)_No Infection_+Rapalog001_Cell 1	1.41788e+06	599882	0.423085	981.209	95.052	0.0968723	4.36745
2	NINL(1-1062)_No Infection_+Rapalog001_Cell 2	1.13232e+06	500680	0.442172	964.639	95.052	0.0985363	4.4874
3	NINL(1-1062)_No Infection_+Rapalog002_Cell 1	771708	332887	0.431364	587.724	95.052	0.161729	2.66721
4	NINL(1-1062)_No Infection_+Rapalog003_Cell 1	962986	351107	0.364603	865.822	95.052	0.109782	3.32114
5	NINL(1-1062)_No Infection_+Rapalog003_Cell 2	1.68188e+06	381282	0.2267	1186.74	95.052	0.080095	2.83039
6	NINL(1-1062)_No Infection_+Rapalog004_Cell 1	1.80803e+06	429634	0.237625	1557.4	95.052	0.0610323	3.89343
7	NINL(1-1062)_No Infection_+Rapalog004_Cell 2	2.13482e+06	680232	0.318636	1326.87	95.052	0.0716365	4.44796
8	NINL(1-1062)_No Infection_+Rapalog004_Cell 3	1.10961e+06	496992	0.447897	1358.22	95.052	0.0699825	6.40013
9	NINL(1-1062)_No Infection_+Rapalog005_Cell 1	555977	234707	0.422152	529.879	95.052	0.179384	2.35334
10	NINL(1-1062)_No Infection_+Rapalog005_Cell 2	623298	190858	0.306207	867.133	95.052	0.109616	2.79344
11	NINL(1-1062)_No Infection_+Rapalog005_Cell 3	1.14138e+06	534603	0.468385	738.671	95.052	0.12868	3.63993
12	NINL(1-1062)_No Infection_+Rapalog006_Cell 1	855710	194749	0.227587	1629.06	95.052	0.0583477	3.90054
13	NINL(1-1062)_No Infection_+Rapalog007_Cell 1	1.02656e+06	388903	0.378841	1488.43	95.052	0.0638604	5.93233
14	NINL(1-1062)_No Infection_+Rapalog007_Cell 2	1.21361e+06	276606	0.227919	1306.19	95.052	0.0727701	3.13204
15	NINL(1-1062)_No Infection_+Rapalog007_Cell 3	688385	182884	0.265671	793.592	95.052	0.119774	2.21809
16	NINL(1-1062)_No Infection_+Rapalog008_Cell 1	848279	329435	0.388357	1586.01	95.052	0.0599316	6.48
17	NINL(1-1062)_No Infection_+Rapalog009_Cell 1	1.04463e+06	309766	0.296531	1076.33	95.052	0.0883113	3.35779
18	NINL(1-1062)_No Infection_+Rapalog009_Cell 2	1.22965e+06	213912	0.173962	1683.51	95.052	0.0564605	3.08113
19	NINL(1-1062)_No Infection_+Rapalog009_Cell 3	747758	335943	0.449267	1164.56	95.052	0.0816207	5.50433
20	NINL(1-1062)_No Infection_+Rapalog010_Cell 1	1.50247e+06	346791	0.230814	1448.03	95.052	0.0656421	3.51624
21	NINL(1-1062)_No Infection_+Rapalog010_Cell 2	1.4963e+06	340886	0.227819	968.773	95.052	0.0981159	2.32194
22	NINL(1-1062)_No Infection_+Rapalog010_Cell 3	2.11253e+06	411845	0.194954	1939.93	95.052	0.0489976	3.97885
			Average	0.325025			Average	3.8466
NINL(1-1062)_No Infection_+EtOH (REP. 2)
1	Rep. 2 NINL(1-1062)_No Infection_+Rapalog001_Cell 1	911164	347377	0.381246	781.324	95.052	0.121655	3.13383
2	Rep. 2 NINL(1-1062)_No Infection_+Rapalog001_Cell 2	561606	198541	0.353523	1080.04	95.052	0.0880079	4.01695
3	Rep. 2 NINL(1-1062)_No Infection_+Rapalog001_Cell 3	475318	124973	0.262924	1649.06	95.052	0.05764	4.56149
4	Rep. 2 NINL(1-1062)_No Infection_+Rapalog001_Cell 4	609998	193539	0.317278	668.391	95.052	0.14221	2.23105
5	Rep. 2 NINL(1-1062)_No Infection_+Rapalog001_Cell 5	547968	122395	0.223362	925.825	95.052	0.102667	2.17559
6	Rep. 2 NINL(1-1062)_No Infection_+Rapalog001_Cell 6	563017	151628	0.269313	754.637	95.052	0.125957	2.13813
7	Rep. 2 NINL(1-1062)_No Infection_+Rapalog002_Cell 1	1.01014e+06	242251	0.239819	1035.89	95.052	0.0917584	2.6136
8	Rep. 2 NINL(1-1062)_No Infection_+Rapalog002_Cell 2	1.07783e+06	254734	0.236341	801.087	95.052	0.118654	1.99185
9	Rep. 2 NINL(1-1062)_No Infection_+Rapalog002_Cell 3	811050	165742	0.204355	1689.4	95.052	0.0562639	3.63208
10	Rep. 2 NINL(1-1062)_No Infection_+Rapalog002_Cell 4	896945	351994	0.392436	577.641	95.052	0.164552	2.38488
11	Rep. 2 NINL(1-1062)_No Infection_+Rapalog002_Cell 5	683172	202744	0.296769	972.537	95.052	0.0977361	3.03643
12	Rep. 2 NINL(1-1062)_No Infection_+Rapalog003_Cell 1	1.09463e+06	366744	0.33504	778.232	95.052	0.122138	2.74312
13	Rep. 2 NINL(1-1062)_No Infection_+Rapalog003_Cell 2	1.27195e+06	293479	0.230732	1703.89	95.052	0.0557853	4.13607
14	Rep. 2 NINL(1-1062)_No Infection_+Rapalog003_Cell 3	1.29883e+06	322277	0.248128	863.537	95.052	0.110073	2.25422
15	Rep. 2 NINL(1-1062)_No Infection_+Rapalog003_Cell 4	1.13098e+06	227207	0.200893	1312.84	95.052	0.0724016	2.77471
16	Rep. 2 NINL(1-1062)_No Infection_+Rapalog004_Cell 1	1.26776e+06	515436	0.406573	715.816	95.052	0.132788	3.06181
17	Rep. 2 NINL(1-1062)_No Infection_+Rapalog004_Cell 2	1.21457e+06	264350	0.217649	1414.2	95.052	0.0672127	3.23821
18	Rep. 2 NINL(1-1062)_No Infection_+Rapalog004_Cell 3	859900	163846	0.190541	794.836	95.052	0.119587	1.59333
19	Rep. 2 NINL(1-1062)_No Infection_+Rapalog004_Cell 4	1.26242e+06	462182	0.366109	832.715	95.052	0.114147	3.20735
20	Rep. 2 NINL(1-1062)_No Infection_+Rapalog004_Cell 5	874096	215347	0.246366	1696.12	95.052	0.0560408	4.39618
21	Rep. 2 NINL(1-1062)_No Infection_+Rapalog005_Cell 1	915573	378387	0.413279	1502.38	95.052	0.0632677	6.53223
22	Rep. 2 NINL(1-1062)_No Infection_+Rapalog005_Cell 2	1.13423e+06	252229	0.222379	779.072	95.052	0.122007	1.82268
23	Rep. 2 NINL(1-1062)_No Infection_+Rapalog006_Cell 1	619322	197705	0.319228	733.697	95.052	0.129552	2.46409
24	Rep. 2 NINL(1-1062)_No Infection_+Rapalog006_Cell 2	676594	191826	0.283518	802.835	95.052	0.118395	2.39467
25	Rep. 2 NINL(1-1062)_No Infection_+Rapalog006_Cell 3	639201	215907	0.337777	650.745	95.052	0.146066	2.31249
26	Rep. 2 NINL(1-1062)_No Infection_+Rapalog007_Cell 1	660759	175782	0.266031	604.966	95.052	0.15712	1.69317
27	Rep. 2 NINL(1-1062)_No Infection_+Rapalog007_Cell 2	699231	169425	0.242302	686.675	95.052	0.138424	1.75044
28	Rep. 2 NINL(1-1062)_No Infection_+Rapalog007_Cell 3	886115	257509	0.290604	715.849	95.052	0.132782	2.18858
29	Rep. 2 NINL(1-1062)_No Infection_+Rapalog008_Cell 1	1.26129e+06	456828	0.362191	1573.45	95.052	0.0604099	5.99557
30	Rep. 2 NINL(1-1062)_No Infection_+Rapalog008_Cell 2	1.28138e+06	275921	0.215332	1930.84	95.052	0.0492283	4.37415
			Average	0.287823			Average	2.99388
NINL(1-1062)_No Infection_+EtOH (REP. 3)
1	Rep. 3 NINL(1-1062)_No Infection_+Rapalog001_Cell 1	776514	322284	0.41504	1165.8	95.052	0.0815336	5.09042
2	Rep. 3 NINL(1-1062)_No Infection_+Rapalog001_Cell 2	580096	200574	0.345761	1279.61	95.052	0.0742821	4.6547
3	Rep. 3 NINL(1-1062)_No Infection_+Rapalog001_Cell 3	814781	266577	0.327176	942.859	95.052	0.100813	3.24539
4	Rep. 3 NINL(1-1062)_No Infection_+Rapalog001_Cell 4	804484	287510	0.357384	1053.34	95.052	0.0902388	3.96043
5	Rep. 3 NINL(1-1062)_No Infection_+Rapalog001_Cell 5	928349	329274	0.354687	1269.76	95.052	0.0748582	4.73812
6	Rep. 3 NINL(1-1062)_No Infection_+Rapalog002_Cell 1	988896	408010	0.412591	1250.4	95.052	0.0760172	5.42761
7	Rep. 3 NINL(1-1062)_No Infection_+Rapalog002_Cell 2	840730	169016	0.201035	1107.96	95.052	0.0857903	2.34333
8	Rep. 3 NINL(1-1062)_No Infection_+Rapalog002_Cell 3	624330	123606	0.197981	918.76	95.052	0.103457	1.91366
9	Rep. 3 NINL(1-1062)_No Infection_+Rapalog002_Cell 4	1.05145e+06	491368	0.467325	1286.36	95.052	0.073892	6.32444
10	Rep. 3 NINL(1-1062)_No Infection_+Rapalog003_Cell 1	934389	224582	0.240352	854.731	95.052	0.111207	2.1613
11	Rep. 3 NINL(1-1062)_No Infection_+Rapalog003_Cell 2	1.10226e+06	288177	0.261443	997.544	95.052	0.095286	2.74378
12	Rep. 3 NINL(1-1062)_No Infection_+Rapalog004_Cell 1	1.58916e+06	464739	0.292443	1151.32	95.052	0.0825595	3.54221
13	Rep. 3 NINL(1-1062)_No Infection_+Rapalog004_Cell 2	1.482e+06	439098	0.296288	813.053	95.052	0.116908	2.53438
14	Rep. 3 NINL(1-1062)_No Infection_+Rapalog004_Cell 3	1.18852e+06	259482	0.218323	988.267	95.052	0.0961805	2.26994
15	Rep. 3 NINL(1-1062)_No Infection_+Rapalog004_Cell 4	1.43346e+06	356964	0.249023	1074.68	95.052	0.0884466	2.81552
16	Rep. 3 NINL(1-1062)_No Infection_+Rapalog005_Cell 1	1.43346e+06	356964	0.249023	1074.68	95.052	0.0884466	2.81552
17	Rep. 3 NINL(1-1062)_No Infection_+Rapalog005_Cell 2	748254	228901	0.305914	987.73	95.052	0.0962328	3.17889
18	Rep. 3 NINL(1-1062)_No Infection_+Rapalog005_Cell 3	567183	226743	0.399771	947.665	95.052	0.100301	3.9857
19	Rep. 3 NINL(1-1062)_No Infection_+Rapalog005_Cell 4	903355	434607	0.481103	1321.59	95.052	0.0719225	6.68919
20	Rep. 3 NINL(1-1062)_No Infection_+Rapalog005_Cell 5	910361	254711	0.279792	1384.54	95.052	0.0686523	4.07549
21	Rep. 3 NINL(1-1062)_No Infection_+Rapalog006_Cell 1	1.99706e+06	423125	0.211874	2591.15	95.052	0.0366834	5.77575
22	Rep. 3 NINL(1-1062)_No Infection_+Rapalog006_Cell 2	560221	103805	0.185292	874.427	95.052	0.108702	1.70459
23	Rep. 3 NINL(1-1062)_No Infection_+Rapalog007_Cell 1	813076	265324	0.326322	946.959	95.052	0.100376	3.25099
24	Rep. 3 NINL(1-1062)_No Infection_+Rapalog007_Cell 2	787232	207783	0.263941	996.536	95.052	0.0953824	2.76719
25	Rep. 3 NINL(1-1062)_No Infection_+Rapalog007_Cell 3	906450	336808	0.371569	1202.4	95.052	0.0790516	4.70033
26	Rep. 3 NINL(1-1062)_No Infection_+Rapalog007_Cell 4	709679	230727	0.325115	924.574	95.052	0.102806	3.1624
27	Rep. 3 NINL(1-1062)_No Infection_+Rapalog007_Cell 5	547223	192868	0.352448	1163.79	95.052	0.0816749	4.31526
28	Rep. 3 NINL(1-1062)_No Infection_+Rapalog008_Cell 1	1.42821e+06	511699	0.358281	989.007	95.052	0.0961085	3.72788
29	Rep. 3 NINL(1-1062)_No Infection_+Rapalog008_Cell 2	2.05403e+06	524476	0.25534	1359.27	95.052	0.0699289	3.65142
			Average	0.310436			Average	3.71061
NINL(1-1062)_No Infection_+EtOH (REP. 3)

## Sheet: ∆NINL(1-1062)_Ctrl_+EtOH
Set	Name	Whole Cell Integrated Density	Centrosome Integrated Density	Percent Of Total Flourescence at Centrsome	Whole Cell Area	Centrosome Area	Percent of Total Area at Centrosome	Normalized Peroxisome Flourescence at Centrosome
NINL(1-1062)_No Infection_+EtOH (REP. 1)
1	∆NINL(1-1062)_Ctrl_+EtOH_No Infection_+EtOH001_Cell 1	1.61275e+06	111759	0.0692969	1300.52	95.052	0.073088	0.948131
2	∆NINL(1-1062)_Ctrl_+EtOH_No Infection_+EtOH001_Cell 2	952481	118039	0.123928	903.87	95.052	0.105161	1.17846
3	∆NINL(1-1062)_Ctrl_+EtOH_No Infection_+EtOH002_Cell 1	2.70305e+06	196878	0.0728356	954.69	95.052	0.0995632	0.731552
4	∆NINL(1-1062)_Ctrl_+EtOH_No Infection_+EtOH002_Cell 2	2.31431e+06	146259	0.0631975	1164.83	95.052	0.0816018	0.774462
5	∆NINL(1-1062)_Ctrl_+EtOH_No Infection_+EtOH003_Cell 1	1.24537e+06	108708	0.0872894	1146.44	95.052	0.0829105	1.05281
6	∆NINL(1-1062)_Ctrl_+EtOH_No Infection_+EtOH003_Cell 2	1.36295e+06	129247	0.0948291	839.874	95.052	0.113174	0.837905
7	∆NINL(1-1062)_Ctrl_+EtOH_No Infection_+EtOH003_Cell 3	1.20154e+06	158488	0.131904	759.947	95.052	0.125077	1.05458
8	∆NINL(1-1062)_Ctrl_+EtOH_No Infection_+EtOH004_Cell 1	1.81107e+06	154172	0.085128	1064.36	95.052	0.0893041	0.953238
9	∆NINL(1-1062)_Ctrl_+EtOH_No Infection_+EtOH004_Cell 2	3.12599e+06	423534	0.135488	1161.13	95.052	0.0818617	1.65508
10	∆NINL(1-1062)_Ctrl_+EtOH_No Infection_+EtOH004_Cell 3	4.45413e+06	256073	0.0574911	2088.29	95.052	0.0455166	1.26308
11	∆NINL(1-1062)_Ctrl_+EtOH_No Infection_+EtOH004_Cell 4	2.16898e+06	209344	0.0965177	1286.9	95.052	0.0738611	1.30675
12	∆NINL(1-1062)_Ctrl_+EtOH_No Infection_+EtOH005_Cell 1	1.18184e+06	79641.1	0.0673874	1485.34	95.052	0.0639933	1.05304
13	∆NINL(1-1062)_Ctrl_+EtOH_No Infection_+EtOH005_Cell 2	847353	86900.1	0.102555	920.339	95.052	0.103279	0.992984
14	∆NINL(1-1062)_Ctrl_+EtOH_No Infection_+EtOH006_Cell 1	944953	119326	0.126277	736.05	95.052	0.129138	0.977843
15	∆NINL(1-1062)_Ctrl_+EtOH_No Infection_+EtOH006_Cell 2	1.39319e+06	182642	0.131097	1101.2	95.052	0.0863167	1.51879
16	∆NINL(1-1062)_Ctrl_+EtOH_No Infection_+EtOH006_Cell 3	1.13983e+06	148272	0.130083	1160.79	95.052	0.0818854	1.58859
17	∆NINL(1-1062)_Ctrl_+EtOH_No Infection_+EtOH006_Cell 4	2.13338e+06	189446	0.0888008	1328.11	95.052	0.0715694	1.24076
18	∆NINL(1-1062)_Ctrl_+EtOH_No Infection_+EtOH006_Cell 5	1.22359e+06	86261.2	0.0704988	1168.26	95.052	0.0813624	0.866479
19	∆NINL(1-1062)_Ctrl_+EtOH_No Infection_+EtOH007_Cell 1	888732	98759.7	0.111124	983.864	95.052	0.0966109	1.15022
20	∆NINL(1-1062)_Ctrl_+EtOH_No Infection_+EtOH007_Cell 2	1.64069e+06	167260	0.101945	1353.28	95.052	0.070238	1.45142
21	∆NINL(1-1062)_Ctrl_+EtOH_No Infection_+EtOH007_Cell 3	1.05059e+06	154050	0.146632	812.515	95.052	0.116985	1.25343
22	∆NINL(1-1062)_Ctrl_+EtOH_No Infection_+EtOH007_Cell 4	1.10359e+06	196653	0.178193	619.419	95.052	0.153453	1.16122
23	∆NINL(1-1062)_Ctrl_+EtOH_No Infection_+EtOH008_Cell 1	1.10908e+06	164336	0.148173	1097.5	95.052	0.0866074	1.71085
24	∆NINL(1-1062)_Ctrl_+EtOH_No Infection_+EtOH008_Cell 2	760037	127977	0.168383	699.346	95.052	0.135916	1.23888
25	∆NINL(1-1062)_Ctrl_+EtOH_No Infection_+EtOH008_Cell 3	1.59122e+06	100291	0.0630279	1421.45	95.052	0.0668699	0.942545
26	∆NINL(1-1062)_Ctrl_+EtOH_No Infection_+EtOH008_Cell 4	1.27774e+06	97055.8	0.0759591	1368.41	95.052	0.0694617	1.09354
27	∆NINL(1-1062)_Ctrl_+EtOH_No Infection_+EtOH009_Cell 1	1.52283e+06	145059	0.0952558	1168.83	95.052	0.0813226	1.17133
28	∆NINL(1-1062)_Ctrl_+EtOH_No Infection_+EtOH009_Cell 2	1.28991e+06	76568.4	0.0593597	1886.96	95.052	0.0503731	1.1784
29	∆NINL(1-1062)_Ctrl_+EtOH_No Infection_+EtOH010_Cell 1	1.63224e+06	170727	0.104597	1377.75	95.052	0.0689906	1.5161
30	∆NINL(1-1062)_Ctrl_+EtOH_No Infection_+EtOH010_Cell 2	922532	146108	0.158377	734.638	95.052	0.129386	1.22407
31	∆NINL(1-1062)_Ctrl_+EtOH_No Infection_+EtOH010_Cell 3	1.89142e+06	140865	0.0744757	1247.54	95.052	0.0761913	0.977482
32	∆NINL(1-1062)_Ctrl_+EtOH_No Infection_+EtOH010_Cell 4	1.81476e+06	138509	0.0763239	1417.21	95.052	0.0670697	1.13798
			Average	0.103295			Average	1.13686
NINL(1-1062)_No Infection_+EtOH (REP. 2)
1	Rep. 2 ∆NINL(1-1062)_Ctrl_+EtOH_No Infection_+EtOH001_Cell 1	913364	92008.6	0.100736	1093.34	95.052	0.0869376	1.15872
2	Rep. 2 ∆NINL(1-1062)_Ctrl_+EtOH_No Infection_+EtOH001_Cell 2	1.27159e+06	139926	0.11004	1188.19	95.052	0.0799976	1.37554
3	Rep. 2 ∆NINL(1-1062)_Ctrl_+EtOH_No Infection_+EtOH001_Cell 3	2.94448e+06	266459	0.0904946	1673.73	95.052	0.0567905	1.59348
4	Rep. 2 ∆NINL(1-1062)_Ctrl_+EtOH_No Infection_+EtOH001_Cell 4	1.09579e+06	113973	0.10401	771.879	95.052	0.123144	0.844622
5	Rep. 2 ∆NINL(1-1062)_Ctrl_+EtOH_No Infection_+EtOH002_Cell 1	1.49222e+06	133934	0.0897548	1520.47	95.052	0.062515	1.43573
6	Rep. 2 ∆NINL(1-1062)_Ctrl_+EtOH_No Infection_+EtOH003_Cell 1	1.92145e+06	224012	0.116585	1145.3	95.052	0.0829932	1.40475
7	Rep. 2 ∆NINL(1-1062)_Ctrl_+EtOH_No Infection_+EtOH003_Cell 2	1.6379e+06	150409	0.0918302	1411.97	95.052	0.0673188	1.36411
8	Rep. 2 ∆NINL(1-1062)_Ctrl_+EtOH_No Infection_+EtOH004_Cell 1	1.65096e+06	181515	0.109945	1202.84	95.052	0.0790229	1.39131
9	Rep. 2 ∆NINL(1-1062)_Ctrl_+EtOH_No Infection_+EtOH004_Cell 2	1.49455e+06	218805	0.146402	1030.68	95.052	0.0922222	1.58749
10	Rep. 2 ∆NINL(1-1062)_Ctrl_+EtOH_No Infection_+EtOH004_Cell 3	2.2577e+06	181836	0.0805405	1816.11	95.052	0.0523383	1.53885
11	Rep. 2 ∆NINL(1-1062)_Ctrl_+EtOH_No Infection_+EtOH004_Cell 4	3.4015e+06	296629	0.0872053	2273.49	95.052	0.0418089	2.08581
12	Rep. 2 ∆NINL(1-1062)_Ctrl_+EtOH_No Infection_+EtOH005_Cell 1	1.86764e+06	171678	0.0919224	1000.4	95.052	0.0950139	0.967463
13	Rep. 2 ∆NINL(1-1062)_Ctrl_+EtOH_No Infection_+EtOH005_Cell 2	2.53313e+06	184306	0.0727583	1317.72	95.052	0.0721335	1.00866
14	Rep. 2 ∆NINL(1-1062)_Ctrl_+EtOH_No Infection_+EtOH005_Cell 3	2.02064e+06	192009	0.0950239	1373.05	95.052	0.0692271	1.37264
15	Rep. 2 ∆NINL(1-1062)_Ctrl_+EtOH_No Infection_+EtOH005_Cell 4	1.3675e+06	151980	0.111137	871.637	95.052	0.10905	1.01914
16	Rep. 2 ∆NINL(1-1062)_Ctrl_+EtOH_No Infection_+EtOH006_Cell 1	1.4012e+06	100924	0.0720267	1174.94	95.052	0.0808992	0.890327
17	Rep. 2 ∆NINL(1-1062)_Ctrl_+EtOH_No Infection_+EtOH006_Cell 2	1.86372e+06	90767.3	0.0487022	1597.03	95.052	0.0595179	0.818279
18	Rep. 2 ∆NINL(1-1062)_Ctrl_+EtOH_No Infection_+EtOH007_Cell 1	1.14177e+06	84396.1	0.0739172	1817.59	95.052	0.0522957	1.41345
19	Rep. 2 ∆NINL(1-1062)_Ctrl_+EtOH_No Infection_+EtOH007_Cell 2	1.12424e+06	71466.9	0.063569	1990.32	95.052	0.0477572	1.33109
20	Rep. 2 ∆NINL(1-1062)_Ctrl_+EtOH_No Infection_+EtOH008_Cell 1	954632	92701.7	0.0971072	986.957	95.052	0.0963081	1.0083
21	Rep. 2 ∆NINL(1-1062)_Ctrl_+EtOH_No Infection_+EtOH008_Cell 2	515016	120252	0.233492	551.995	95.052	0.172197	1.35596
22	Rep. 2 ∆NINL(1-1062)_Ctrl_+EtOH_No Infection_+EtOH09_Cell 1	1.06398e+06	141123	0.132637	903.702	95.052	0.105181	1.26104
23	Rep. 2 ∆NINL(1-1062)_Ctrl_+EtOH_No Infection_+EtOH09_Cell 2	2.07612e+06	219314	0.105637	1371.13	95.052	0.0693237	1.52382
24	Rep. 2 ∆NINL(1-1062)_Ctrl_+EtOH_No Infection_+EtOH09_Cell 3	1.58448e+06	85630.9	0.0540436	2405.48	95.052	0.0395148	1.36768
25	Rep. 2 ∆NINL(1-1062)_Ctrl_+EtOH_No Infection_+EtOH010_Cell 1	1.0086e+06	87086.3	0.0863433	1269.09	95.052	0.0748979	1.15281
26	Rep. 2 ∆NINL(1-1062)_Ctrl_+EtOH_No Infection_+EtOH010_Cell 2	865292	123731	0.142993	936.17	95.052	0.101533	1.40834
27	Rep. 2 ∆NINL(1-1062)_Ctrl_+EtOH_No Infection_+EtOH010_Cell 3	1.16851e+06	130457	0.111644	954.219	95.052	0.0996124	1.12078
28	Rep. 2 ∆NINL(1-1062)_Ctrl_+EtOH_No Infection_+EtOH010_Cell 4	879740	83311.3	0.0946999	1124.56	95.052	0.0845236	1.1204
			Average	0.0986344			Average	1.29084
NINL(1-1062)_No Infection_+EtOH (REP. 3)
1	Rep. 3 ∆NINL(1-1062)_Ctrl_+EtOH_No Infection_+EtOH001_Cell 1	1.78095e+06	142999	0.0802936	1256.42	95.052	0.0756532	1.06134
2	Rep. 3 ∆NINL(1-1062)_Ctrl_+EtOH_No Infection_+EtOH002_Cell 1	2.32123e+06	161950	0.0697689	1480.27	95.052	0.0642127	1.08653
3	Rep. 3 ∆NINL(1-1062)_Ctrl_+EtOH_No Infection_+EtOH002_Cell 2	2.79817e+06	255543	0.0913251	1338.9	95.052	0.0709927	1.2864
4	Rep. 3 ∆NINL(1-1062)_Ctrl_+EtOH_No Infection_+EtOH002_Cell 3	2.37297e+06	118287	0.0498474	1370.86	95.052	0.0693373	0.718911
5	Rep. 3 ∆NINL(1-1062)_Ctrl_+EtOH_No Infection_+EtOH002_Cell 4	1.71404e+06	296550	0.173013	989.175	95.052	0.0960922	1.80049
6	Rep. 3 ∆NINL(1-1062)_Ctrl_+EtOH_No Infection_+EtOH003_Cell 1	1.34037e+06	189078	0.141064	766.804	95.052	0.123959	1.138
7	Rep. 3 ∆NINL(1-1062)_Ctrl_+EtOH_No Infection_+EtOH003_Cell 2	1.06675e+06	141409	0.132561	728.454	95.052	0.130485	1.01591
8	Rep. 3 ∆NINL(1-1062)_Ctrl_+EtOH_No Infection_+EtOH004_Cell 1	1.9027e+06	261093	0.137222	1129.9	95.052	0.0841239	1.63119
9	Rep. 3 ∆NINL(1-1062)_Ctrl_+EtOH_No Infection_+EtOH004_Cell 2	2.6049e+06	204766	0.0786081	1211.04	95.052	0.0784878	1.00153
10	Rep. 3 ∆NINL(1-1062)_Ctrl_+EtOH_No Infection_+EtOH004_Cell 3	928846	95200.3	0.102493	756.922	95.052	0.125577	0.816177
11	Rep. 3 ∆NINL(1-1062)_Ctrl_+EtOH_No Infection_+EtOH004_Cell 4	1.27642e+06	160000	0.125351	987.629	95.052	0.0962426	1.30245
12	Rep. 3 ∆NINL(1-1062)_Ctrl_+EtOH_No Infection_+EtOH005_Cell 1	1.73388e+06	214690	0.123821	1219.41	95.052	0.0779491	1.58848
13	Rep. 3 ∆NINL(1-1062)_Ctrl_+EtOH_No Infection_+EtOH005_Cell 2	2.39589e+06	186715	0.0779315	1534.01	95.052	0.061963	1.25771
14	Rep. 3 ∆NINL(1-1062)_Ctrl_+EtOH_No Infection_+EtOH005_Cell 3	2.46102e+06	452145	0.183723	1538.99	95.052	0.0617627	2.97465
15	Rep. 3 ∆NINL(1-1062)_Ctrl_+EtOH_No Infection_+EtOH005_Cell 4	2.69588e+06	188055	0.0697566	1518.35	95.052	0.0626022	1.11428
16	Rep. 3 ∆NINL(1-1062)_Ctrl_+EtOH_No Infection_+EtOH006_Cell 1	1.36329e+06	111931	0.0821037	1316.88	95.052	0.0721795	1.13749
17	Rep. 3 ∆NINL(1-1062)_Ctrl_+EtOH_No Infection_+EtOH007_Cell 1	1.19721e+06	126556	0.105709	1122.91	95.052	0.0846476	1.24881
18	Rep. 3 ∆NINL(1-1062)_Ctrl_+EtOH_No Infection_+EtOH007_Cell 2	1.43366e+06	189094	0.131896	1281.66	95.052	0.0741633	1.77846
19	Rep. 3 ∆NINL(1-1062)_Ctrl_+EtOH_No Infection_+EtOH008_Cell 1	1.79897e+06	319324	0.177504	723.647	95.052	0.131351	1.35137
20	Rep. 3 ∆NINL(1-1062)_Ctrl_+EtOH_No Infection_+EtOH008_Cell 2	989346	186772	0.188783	581.405	95.052	0.163487	1.15473
21	Rep. 3 ∆NINL(1-1062)_Ctrl_+EtOH_No Infection_+EtOH008_Cell 3	1.70403e+06	166849	0.0979139	896.543	95.052	0.106021	0.923537
22	Rep. 3 ∆NINL(1-1062)_Ctrl_+EtOH_No Infection_+EtOH008_Cell 4	1.27296e+06	219737	0.172619	802.028	95.052	0.118515	1.45652
23	Rep. 3 ∆NINL(1-1062)_Ctrl_+EtOH_No Infection_+EtOH009_Cell 1	1.43262e+06	167271	0.116759	1100.33	95.052	0.0863852	1.35161
24	Rep. 3 ∆NINL(1-1062)_Ctrl_+EtOH_No Infection_+EtOH009_Cell 2	927798	180923	0.195003	815.305	95.052	0.116585	1.67263
25	Rep. 3 ∆NINL(1-1062)_Ctrl_+EtOH_No Infection_+EtOH009_Cell 3	1.54659e+06	91846.1	0.0593861	1438.12	95.052	0.0660947	0.898501
26	Rep. 3 ∆NINL(1-1062)_Ctrl_+EtOH_No Infection_+EtOH010_Cell 1	2.75943e+06	162199	0.05878	1195.75	95.052	0.0794916	0.73945
27	Rep. 3 ∆NINL(1-1062)_Ctrl_+EtOH_No Infection_+EtOH010_Cell 2	3.07268e+06	171344	0.0557637	1766.63	95.052	0.053804	1.03642
			Average	0.114037			Average	1.31071
NINL(1-1062)_No Infection_+EtOH (REP. 3)

## Sheet: ∆NINL(1-1062)_Ctrl_+Rapalog
Set	Name	Whole Cell Integrated Density	Centrosome Integrated Density	Percent Of Total Flourescence at Centrsome	Whole Cell Area	Centrosome Area	Percent of Total Area at Centrosome	Normalized Peroxisome Flourescence at Centrosome
NINL(1-1062)_No Infection_+EtOH (REP. 1)
1	∆NINL(1-1062) +Rapalog001_Cell 1	1.11206e+06	307907	0.276879	826.497	95.052	0.115006	2.40752			54.862
2	∆NINL(1-1062) +Rapalog001_Cell 2	774209	168137	0.217172	781.828	95.052	0.121577	1.7863			41.5938
3	∆NINL(1-1062) +Rapalog001_Cell 3	729143	157361	0.215816	712.992	95.052	0.133314	1.61885			41.2925
4	∆NINL(1-1062) +Rapalog002_Cell 1	606065	201162	0.331916	501.31	95.052	0.189607	1.75054			67.0924
5	∆NINL(1-1062) +Rapalog002_Cell 2	592538	249283	0.420703	716.622	95.052	0.132639	3.17179			86.823
6	∆NINL(1-1062) +Rapalog002_Cell 3	978442	329244	0.336498	858.999	95.052	0.110654	3.04098			68.1107
7	∆NINL(1-1062) +Rapalog002_Cell 4	977332	194883	0.199403	1022.58	95.052	0.0929528	2.14521			37.6452
8	∆NINL(1-1062) +Rapalog003_Cell 1	930199	354237	0.380819	1018.62	95.052	0.0933147	4.08102			77.9598
9	∆NINL(1-1062) +Rapalog003_Cell 2	1.16376e+06	273602	0.235102	1365.45	95.052	0.0696122	3.37732			45.5783
10	∆NINL(1-1062) +Rapalog004_Cell 1	1.27497e+06	295974	0.232142	1289.52	95.052	0.0737109	3.14936			44.9205
11	∆NINL(1-1062) +Rapalog004_Cell 2	1.11978e+06	269452	0.240628	1499.56	95.052	0.0633866	3.7962			46.8063
12	∆NINL(1-1062) +Rapalog004_Cell 3	522642	132887	0.254261	581.304	95.052	0.163515	1.55497			49.8357
13	∆NINL(1-1062) +Rapalog004_Cell 4	939767	299014	0.318179	1012.27	95.052	0.0939002	3.38848			64.0397
14	∆NINL(1-1062) +Rapalog004_Cell 5	687282	166718	0.242576	798.768	95.052	0.118998	2.03849			47.2392
15	∆NINL(1-1062) +Rapalog004_Cell 6	444747	97720.7	0.219722	635.418	95.052	0.14959	1.46883			42.1605
16	∆NINL(1-1062) +Rapalog004_Cell 7	1.52514e+06	391055	0.256405	1941.08	95.052	0.0489687	5.23611			50.3123
17	∆NINL(1-1062) +Rapalog004_Cell 8	943383	272372	0.288718	898.223	95.052	0.105822	2.72833			57.4929
18	∆NINL(1-1062) +Rapalog005_Cell 1	1.15348e+06	265180	0.229896	882.157	95.052	0.10775	2.13362			44.4213
19	∆NINL(1-1062) +Rapalog005_Cell 2	1.3316e+06	273896	0.20569	1125.97	95.052	0.0844177	2.43657			39.0421
20	∆NINL(1-1062) +Rapalog005_Cell 3	928115	293455	0.316184	1281.32	95.052	0.0741827	4.26224			63.5965
21	∆NINL(1-1062) +Rapalog005_Cell 4	1.6802e+06	606613	0.361037	2097.43	95.052	0.0453182	7.96671			73.5638
22	∆NINL(1-1062) +Rapalog005_Cell 5	941427	269962	0.286758	1026.99	95.052	0.0925542	3.09827			57.0574
23	∆NINL(1-1062) +Rapalog005_Cell 6	1.11448e+06	324199	0.290896	1393.75	95.052	0.0681986	4.26543			57.977
24	∆NINL(1-1062) +Rapalog006_Cell 1	1.33299e+06	296130	0.222154	1041.17	95.052	0.0912934	2.43341			42.701
25	∆NINL(1-1062) +Rapalog006_Cell 2	986331	305808	0.310046	757.191	95.052	0.125532	2.46985			62.2325
26	∆NINL(1-1062) +Rapalog006_Cell 3	1.15234e+06	333019	0.288993	752.385	95.052	0.126334	2.28752			57.5539
27	∆NINL(1-1062) +Rapalog007_Cell 1	808610	316391	0.391278	944.775	95.052	0.100608	3.88913			80.2839
28	∆NINL(1-1062) +Rapalog007_Cell 2	613658	250359	0.407978	765.359	95.052	0.124193	3.28504			83.995
			Average	0.284923			Average	3.04529
NINL(1-1062)_No Infection_+EtOH (REP. 2)
1	Rep. 2 ∆NINL(1-1062) +Rapalog001_Cell 1	1.29237e+06	323231	0.250107	918.659	95.052	0.103468	2.41723			48.9126
2	Rep. 2 ∆NINL(1-1062) +Rapalog001_Cell 2	1.72351e+06	396674	0.230154	1402.86	95.052	0.0677558	3.39682			44.4787
3	Rep. 2 ∆NINL(1-1062) +Rapalog001_Cell 3	860253	258357	0.300327	994.351	95.052	0.095592	3.14175			60.0726
4	Rep. 2 ∆NINL(1-1062) +Rapalog001_Cell 4	711758	246215	0.345925	789.458	95.052	0.120402	2.87309			70.2056
5	Rep. 2 ∆NINL(1-1062) +Rapalog002_Cell 1	1.37421e+06	298651	0.217326	1357.89	95.052	0.0699998	3.10466			41.6279
6	Rep. 2 ∆NINL(1-1062) +Rapalog002_Cell 2	813761	199300	0.244912	1023.76	95.052	0.0928459	2.63784			47.7583
7	Rep. 2 ∆NINL(1-1062) +Rapalog003_Cell 1	635896	201203	0.316408	687.146	95.052	0.138329	2.28736			63.6461
8	Rep. 2 ∆NINL(1-1062) +Rapalog003_Cell 2	657440	126847	0.192942	761.426	95.052	0.124834	1.54558			36.2092
9	Rep. 2 ∆NINL(1-1062) +Rapalog003_Cell 3	724460	169726	0.234279	693.666	95.052	0.137028	1.70971			45.3954
10	Rep. 2 ∆NINL(1-1062) +Rapalog004_Cell 1	1.69808e+06	408735	0.240703	1218.77	95.052	0.07799	3.08634			46.823
11	Rep. 2 ∆NINL(1-1062) +Rapalog004_Cell 2	1.92676e+06	678323	0.352053	998.384	95.052	0.0952059	3.69781			71.5674
12	Rep. 2 ∆NINL(1-1062) +Rapalog004_Cell 3	1.42905e+06	429182	0.300328	1140.32	95.052	0.0833553	3.60298			60.0728
13	Rep. 2 ∆NINL(1-1062) +Rapalog005_Cell 1	1.14462e+06	548802	0.47946	518.384	95.052	0.183362	2.61483			99.88
14	Rep. 2 ∆NINL(1-1062) +Rapalog005_Cell 2	904398	303492	0.335573	634.275	95.052	0.149859	2.23926			67.9052
15	Rep. 2 ∆NINL(1-1062) +Rapalog005_Cell 3	656943	209194	0.318436	645.367	95.052	0.147284	2.16206			64.0969
16	Rep. 2 ∆NINL(1-1062) +Rapalog005_Cell 4	1.07588e+06	298876	0.277797	632.158	95.052	0.150361	1.84753			55.0659
17	Rep. 2 ∆NINL(1-1062) +Rapalog005_Cell 5	1.17597e+06	256452	0.218076	869.284	95.052	0.109345	1.99438			41.7947
18	Rep. 2 ∆NINL(1-1062) +Rapalog006_Cell 1	1.61787e+06	499247	0.308584	1260.11	95.052	0.0754313	4.09092			61.9075
19	Rep. 2 ∆NINL(1-1062) +Rapalog006_Cell 2	1.94527e+06	492080	0.252962	1239.98	95.052	0.076656	3.29997			49.5472
20	Rep. 2 ∆NINL(1-1062) +Rapalog006_Cell 3	1.26494e+06	357342	0.282497	781.996	95.052	0.12155	2.32411			56.1105
21	Rep. 2 ∆NINL(1-1062) +Rapalog006_Cell 4	717566	166691	0.232301	690.271	95.052	0.137702	1.68698			44.9558
22	Rep. 2 ∆NINL(1-1062) +Rapalog007_Cell 1	1.12196e+06	238761	0.212806	1522.41	95.052	0.062435	3.40844			40.6235
23	Rep. 2 ∆NINL(1-1062) +Rapalog007_Cell 2	727171	324368	0.446069	833.589	95.052	0.114027	3.91194			92.4597
24	Rep. 2 ∆NINL(1-1062) +Rapalog008_Cell 1	1.02428e+06	215219	0.210117	1005.44	95.052	0.0945374	2.22258			40.026
25	Rep. 2 ∆NINL(1-1062) +Rapalog008_Cell 2	1.61653e+06	759318	0.46972	840.782	95.052	0.113052	4.1549			97.7155
26	Rep. 2 ∆NINL(1-1062) +Rapalog008_Cell 3	681279	145450	0.213495	775.543	95.052	0.122562	1.74194			40.7767
27	Rep. 2 ∆NINL(1-1062) +Rapalog009_Cell 1	382803	153008	0.399703	1093.74	95.052	0.0869056	4.59928			82.1562
28	Rep. 2 ∆NINL(1-1062) +Rapalog009_Cell 2	341925	129862	0.379798	904.979	95.052	0.105032	3.61602			77.733
29	Rep. 2 ∆NINL(1-1062) +Rapalog009_Cell 3	776969	351513	0.452415	851.907	95.052	0.111576	4.05479			93.8701
30	Rep. 2 ∆NINL(1-1062) +Rapalog009_Cell 4	264537	73046.2	0.276128	970.319	95.052	0.0979595	2.81879			54.6951
			Average	0.290794			Average	2.77836
NINL(1-1062)_No Infection_+EtOH (REP. 3)
1	Rep. 3 ∆NINL(1-1062) +Rapalog001_Cell 1	1.75045e+06	458586	0.261982	1046.45	95.052	0.090833	2.88421			51.5514
2	Rep. 3 ∆NINL(1-1062) +Rapalog001_Cell 2	1.76661e+06	356556	0.201831	1237.16	95.052	0.0768309	2.62695			38.1846
3	Rep. 3 ∆NINL(1-1062) +Rapalog001_Cell 3	1.83595e+06	604873	0.32946	2084.39	95.052	0.0456018	7.22471			66.5466
4	Rep. 3 ∆NINL(1-1062) +Rapalog001_Cell 4	398576	172551	0.43292	236.152	95.052	0.402503	1.07557			89.5377
5	Rep. 3 ∆NINL(1-1062) +Rapalog001_Cell 5	966778	242065	0.250383	1097.84	95.052	0.0865809	2.89189			48.974
6	Rep. 3 ∆NINL(1-1062) +Rapalog001_Cell 6	1.72396e+06	371875	0.21571	1402.49	95.052	0.0677737	3.1828			41.2689
7	Rep. 3 ∆NINL(1-1062) +Rapalog001_Cell 7	1.54553e+06	402278	0.260284	928.07	95.052	0.102419	2.54137			51.1743
8	Rep. 3 ∆NINL(1-1062) +Rapalog002_Cell 1	1.55402e+06	379461	0.24418	1622.61	95.052	0.0585797	4.16833			47.5955
9	Rep. 3 ∆NINL(1-1062) +Rapalog002_Cell 2	1.68052e+06	464783	0.276571	786.13	95.052	0.120911	2.28739			54.7935
10	Rep. 3 ∆NINL(1-1062) +Rapalog003_Cell 1	723801	159812	0.220796	601.975	95.052	0.1579	1.39832			42.399
11	Rep. 3 ∆NINL(1-1062) +Rapalog003_Cell 2	1.29217e+06	299807	0.232019	1186.4	95.052	0.0801177	2.89598			44.8931
12	Rep. 3 ∆NINL(1-1062) +Rapalog003_Cell 3	1.65629e+06	361121	0.21803	1187.31	95.052	0.0800565	2.72345			41.7844
13	Rep. 3 ∆NINL(1-1062) +Rapalog003_Cell 4	2.93744e+06	774183	0.263557	1244.79	95.052	0.0763601	3.4515			51.9015
14	Rep. 3 ∆NINL(1-1062) +Rapalog004_Cell 1	1.07619e+06	283114	0.263071	983.259	95.052	0.0966704	2.72132			51.7934
15	Rep. 3 ∆NINL(1-1062) +Rapalog004_Cell 2	973247	382774	0.393296	837.891	95.052	0.113442	3.46693			80.7324
16	Rep. 3 ∆NINL(1-1062) +Rapalog004_Cell 3	1.011e+06	375429	0.371346	1029.41	95.052	0.0923367	4.02166			75.8547
17	Rep. 3 ∆NINL(1-1062) +Rapalog005_Cell 1	1.44652e+06	323086	0.223354	1481.98	95.052	0.0641385	3.48237			42.9675
18	Rep. 3 ∆NINL(1-1062) +Rapalog005_Cell 2	1.08011e+06	474882	0.439661	1414.26	95.052	0.0672099	6.5416			91.0357
19	Rep. 3 ∆NINL(1-1062) +Rapalog006_Cell 1	1.23216e+06	358857	0.291242	1709.53	95.052	0.0556013	5.23804			58.0538
20	Rep. 3 ∆NINL(1-1062) +Rapalog006_Cell 2	962240	246441	0.256112	847.269	95.052	0.112186	2.28292			50.2471
21	Rep. 3 ∆NINL(1-1062) +Rapalog006_Cell 3	1.24442e+06	357585	0.28735	1168.56	95.052	0.0813413	3.53264			57.1888
22	Rep. 3 ∆NINL(1-1062) +Rapalog006_Cell 4	968315	271180	0.280054	965.714	95.052	0.0984267	2.84531			55.5675
23	Rep. 3 ∆NINL(1-1062) +Rapalog006_Cell 5	1.49679e+06	356003	0.237845	1651.52	95.052	0.0575544	4.13253			46.1878
24	Rep. 3 ∆NINL(1-1062) +Rapalog007_Cell 1	1.89186e+06	400439	0.211664	1313.89	95.052	0.0723438	2.92581			40.3699
25	Rep. 3 ∆NINL(1-1062) +Rapalog007_Cell 2	1.7582e+06	581469	0.330718	944.707	95.052	0.100615	3.28696			66.8263
26	Rep. 3 ∆NINL(1-1062) +Rapalog007_Cell 3	1.83486e+06	623077	0.339578	1058.01	95.052	0.0898403	3.7798			68.7952
27	Rep. 3 ∆NINL(1-1062) +Rapalog007_Cell 4	1.03151e+06	388238	0.376379	1306.67	95.052	0.0727439	5.17403			76.9731
28	Rep. 3 ∆NINL(1-1062) +Rapalog007_Cell 5	566553	139777	0.246715	813.12	95.052	0.116898	2.11051			48.1588
29	Rep. 3 ∆NINL(1-1062) +Rapalog008_Cell 1	1.74729e+06	384594	0.220109	1830.66	95.052	0.0519222	4.23921			42.2464
30	Rep. 3 ∆NINL(1-1062) +Rapalog008_Cell 2	1.4579e+06	401455	0.275366	1212.59	95.052	0.0783877	3.51287			54.5257
			Average	0.281719			Average	3.43646
NINL(1-1062)_No Infection_+EtOH (REP. 3)

## Sheet: NINL(1-1062)_CVB3_+EtOH
Set	Name	Whole Cell Integrated Density	Centrosome Integrated Density	Percent Of Total Flourescence at Centrsome	Whole Cell Area	Centrosome Area	Percent of Total Area at Centrosome	Normalized Peroxisome Flourescence at Centrosome
NINL(1-1062)_No Infection_+EtOH (REP. 1)
1	NINL(1-1062)_Infected_+EtOH_Cell 1	941044	164345	0.174641	742.436	95.052	0.128027	1.36409			32.1425
2	NINL(1-1062)_Infected_+EtOH_Cell 2	620522	40326.7	0.0649883	463.296	95.052	0.205165	0.316762			7.77518
3	NINL(1-1062)_Infected_+EtOH_Cell 3	1.2736e+06	77351	0.0607344	1835.94	95.052	0.0517729	1.17309			6.82987
4	NINL(1-1062)_Infected_+EtOH_0002_Cell 1	3.43903e+06	205055	0.0596259	1351.91	95.052	0.0703096	0.848047			6.58353
5	NINL(1-1062)_Infected_+EtOH_0002_Cell 2	2.36472e+06	173988	0.0735764	1189.53	95.052	0.0799071	0.920774			9.68364
6	NINL(1-1062)_Infected_+EtOH_0002_Cell 3	845756	61793.9	0.0730635	1470.86	95.052	0.0646236	1.1306			9.56967
7	NINL(1-1062)_Infected_+EtOH_0002_Cell 4	725472	69738.1	0.0961278	997.141	95.052	0.0953245	1.00843			14.6951
8	NINL(1-1062)_Infected_+EtOH_0003_Cell 1	1.81755e+06	117790	0.0648068	1659.92	95.052	0.0572631	1.13174			7.73485
9	NINL(1-1062)_Infected_+EtOH_0003_Cell 2	2.41677e+06	282220	0.116776	1743.41	95.052	0.0545208	2.14186			19.2835
10	NINL(1-1062)_Infected_+EtOH_0003_Cell 3	2.19972e+06	105275	0.0478582	1669.93	95.052	0.0569196	0.840803			3.96848
11	NINL(1-1062)_Infected_+EtOH_0003_Cell 4	2.76036e+06	141248	0.0511702	2188.08	95.052	0.0434408	1.17793			4.70448
12	NINL(1-1062)_Infected_+EtOH_0004_Cell 1	2.13449e+06	199299	0.0933706	1380.17	95.052	0.0688696	1.35576			14.0823
13	NINL(1-1062)_Infected_+EtOH_0004_Cell 2	2.10369e+06	119292	0.056706	1282.53	95.052	0.0741127	0.765132			5.93466
14	NINL(1-1062)_Infected_+EtOH_0004_Cell 3	1.5827e+06	44990	0.028426	1485.34	95.052	0.0639933	0.444203			-0.349769
15	NINL(1-1062)_Infected_+EtOH_0004_Cell 4	1.68269e+06	171241	0.101766	1540.87	95.052	0.0616873	1.64971			15.948
16	NINL(1-1062)_Infected_+EtOH_0005_Cell 1	1.73815e+06	109285	0.0628742	2238.57	95.052	0.0424611	1.48075			7.30538
17	NINL(1-1062)_Infected_+EtOH_0005_Cell 2	1.40327e+06	106921	0.0761943	1424.64	95.052	0.06672	1.142			10.2654
18	NINL(1-1062)_Infected_+EtOH_0005_Cell 3	1.30394e+06	86985.6	0.0667099	1749.46	95.052	0.0543323	1.22781			8.15775
19	NINL(1-1062)_Infected_+EtOH_0005_Cell 4	1.01609e+06	76566.4	0.0753538	1399.53	95.052	0.0679169	1.1095			10.0786
20	NINL(1-1062)_Infected_+EtOH_0006_Cell 1	782445	107814	0.137791	609.84	95.052	0.155864	0.88405			23.9537
21	NINL(1-1062)_Infected_+EtOH_0006_Cell 2	1.82606e+06	281041	0.153906	761.964	95.052	0.124746	1.23375			27.5346
22	NINL(1-1062)_Infected_+EtOH_0006_Cell 3	1.06911e+06	138540	0.129584	620.495	95.052	0.153187	0.845921			22.1299
23	NINL(1-1062)_Infected_+EtOH_0006_Cell 4	1.51034e+06	198550	0.13146	832.278	95.052	0.114207	1.15107			22.5468
24	NINL(1-1062)_Infected_+EtOH_0006_Cell 5	729251	103813	0.142355	693.296	95.052	0.137102	1.03832			24.9678
25	NINL(1-1062)_Infected_+EtOH_0007_Cell 1	1.86458e+06	118960	0.0637999	1665.16	95.052	0.0570827	1.11767			7.51108
26	NINL(1-1062)_Infected_+EtOH_0007_Cell 2	2.07777e+06	179966	0.0866152	1513.88	95.052	0.0627871	1.37951			12.5812
27	NINL(1-1062)_Infected_+EtOH_0008_Cell 1	1.97838e+06	127429	0.0644108	1566.35	95.052	0.0606839	1.06141			7.64684
28	NINL(1-1062)_Infected_+EtOH_0008_Cell 2	1.08057e+06	205042	0.189754	1025.88	95.052	0.0926543	2.04798			35.5009
29	NINL(1-1062)_Infected_+EtOH_0008_Cell 3	2.08924e+06	155291	0.0743293	888.678	95.052	0.106959	0.694933			9.85095
			Average	0.0903026			Average	1.12702
NINL(1-1062)_No Infection_+EtOH (REP. 2)
1	Rep 2 NINL(1-1062) Infected + EtOH_002_Cell 1	1.41983e+06	91612.5	0.0645237	1201.46	95.052	0.0791135	0.815583			7.67193
2	Rep 2 NINL(1-1062) Infected + EtOH_002_Cell 2	1.8477e+06	93291.2	0.0504904	1494.32	95.052	0.063609	0.793762			4.55343
3	Rep 2 NINL(1-1062) Infected + EtOH_002_Cell 3	1.45022e+06	120367	0.0829989	1814.9	95.052	0.0523732	1.58476			11.7775
4	Rep 2 NINL(1-1062) Infected + EtOH_003_Cell 1	1.31446e+06	172558	0.131277	1057.04	95.052	0.0899231	1.45988			22.5059
5	Rep 2 NINL(1-1062) Infected + EtOH_003_Cell 2	1.33752e+06	226488	0.169334	1051.76	95.052	0.0903743	1.8737			30.9631
6	Rep 2 NINL(1-1062) Infected + EtOH_003_Cell 3	2.51844e+06	117120	0.046505	2157.7	95.052	0.0440525	1.05567			3.66778
7	Rep 2 NINL(1-1062) Infected + EtOH_004_Cell 1	1.34021e+06	190556	0.142184	596.832	95.052	0.159261	0.892776			24.9298
8	Rep 2 NINL(1-1062) Infected + EtOH_004_Cell 2	1.15566e+06	131342	0.113652	740.554	95.052	0.128353	0.885466			18.5893
9	Rep 2 NINL(1-1062) Infected + EtOH_005_Cell 1	1.37076e+06	199057	0.145217	948.237	95.052	0.100241	1.44868			25.6037
10	Rep 2 NINL(1-1062) Infected + EtOH_006_Cell 1	1.52459e+06	167268	0.109714	1616.83	95.052	0.0587891	1.86622			17.7141
11	Rep 2 NINL(1-1062) Infected + EtOH_007_Cell 1	1.61735e+06	151252	0.0935184	1437.75	95.052	0.0661117	1.41455			14.1152
12	Rep 2 NINL(1-1062) Infected + EtOH_007_Cell 2	2.00154e+06	223500	0.111664	1205.6	95.052	0.0788423	1.4163			18.1476
13	Rep 2 NINL(1-1062) Infected + EtOH_008_Cell 1	1.65704e+06	184735	0.111485	1252.85	95.052	0.0758684	1.46945			18.1078
14	Rep 2 NINL(1-1062) Infected + EtOH_008_Cell 2	1.57996e+06	220463	0.139536	1103.32	95.052	0.086151	1.61967			24.3414
15	Rep 2 NINL(1-1062) Infected + EtOH_008_Cell 3	2.29438e+06	183845	0.0801282	1856.85	95.052	0.05119	1.56531			11.1396
16	Rep 2 NINL(1-1062) Infected + EtOH_008_Cell 4	3.31988e+06	284176	0.0855981	2212.69	95.052	0.0429577	1.99261			12.3551
17	Rep 2 NINL(1-1062) Infected + EtOH_009_Cell 1	1.60146e+06	122987	0.076797	1434.72	95.052	0.0662511	1.15918			10.3993
18	Rep 2 NINL(1-1062) Infected + EtOH_009_Cell 2	2.44927e+06	194161	0.079273	1259.21	95.052	0.0754856	1.05017			10.9496
19	Rep 2 NINL(1-1062) Infected + EtOH_009_Cell 3	1.81669e+06	188724	0.103884	1171.75	95.052	0.0811196	1.28063			16.4187
20	Rep 2 NINL(1-1062) Infected + EtOH_009_Cell 4	1.24923e+06	153280	0.1227	755.578	95.052	0.1258	0.975352			20.5999
21	Rep 2 NINL(1-1062) Infected + EtOH_009_Cell 5	1.80719e+06	81921.4	0.0453307	937.481	95.052	0.101391	0.447089			3.40683
22	Rep 2 NINL(1-1062) Infected + EtOH_010_Cell 1	826992	140412	0.169787	1188.99	95.052	0.0799433	2.12384			31.0637
23	Rep 2 NINL(1-1062) Infected + EtOH_010_Cell 2	1.93787e+06	101720	0.0524904	1649.53	95.052	0.0576236	0.910918			4.99786
24	Rep 2 NINL(1-1062) Infected + EtOH_010_Cell 3	1.97852e+06	99512.7	0.0502965	1534.72	95.052	0.0619345	0.812091			4.51033
25	Rep 2 NINL(1-1062) Infected + EtOH_010_Cell 4	2.09549e+06	383845	0.183177	1747.85	95.052	0.0543824	3.36831			34.0393
			Average	0.102462			Average	1.37128
NINL(1-1062)_No Infection_+EtOH (REP. 3)
1	Rep 3 NINL(1-1062) Infected +EtOH_0001_Cell 1	2.29883e+06	165192	0.0718591	1453.04	95.052	0.0654159	1.0985			9.30202
2	Rep 3 NINL(1-1062) Infected +EtOH_0001_Cell 2	2.75219e+06	552609	0.200789	1310.23	95.052	0.0725462	2.76774			37.9531
3	Rep 3 NINL(1-1062) Infected +EtOH_0001_Cell 3	2.33639e+06	120838	0.0517199	1304.48	95.052	0.0728658	0.709797			4.82664
4	Rep 3 NINL(1-1062) Infected +EtOH_0001_Cell 4	1.80111e+06	287635	0.159698	1119.62	95.052	0.0848967	1.88109			28.8218
5	Rep 3 NINL(1-1062) Infected +EtOH_0002_Cell 1	2.45272e+06	240964	0.0982435	1201.4	95.052	0.079118	1.24173			15.1652
6	Rep 3 NINL(1-1062) Infected +EtOH_0003_Cell 1	1.63354e+06	186233	0.114006	977.478	95.052	0.0972421	1.17239			18.668
7	Rep 3 NINL(1-1062) Infected +EtOH_0003_Cell 2	1.7653e+06	137916	0.0781261	1069.57	95.052	0.0888691	0.879114			10.6947
8	Rep 3 NINL(1-1062) Infected +EtOH_0004_Cell 1	1.5826e+06	144062	0.0910287	1669.13	95.052	0.0569471	1.59848			13.5619
9	Rep 3 NINL(1-1062) Infected +EtOH_0004_Cell 2	678087	111377	0.164252	856.512	95.052	0.110976	1.48007			29.8337
10	Rep 3 NINL(1-1062) Infected +EtOH_0005_Cell 1	1.12947e+06	107207	0.0949174	1214.4	95.052	0.0782706	1.21268			14.4261
11	Rep 3 NINL(1-1062) Infected +EtOH_0005_Cell 2	1.04406e+06	97907	0.0937755	1435.63	95.052	0.0662092	1.41635			14.1723
12	Rep 3 NINL(1-1062) Infected +EtOH_0005_Cell 3	835062	100298	0.120108	1025.27	95.052	0.092709	1.29554			20.024
13	Rep 3 NINL(1-1062) Infected +EtOH_0005_Cell 4	674286	100257	0.148686	820.414	95.052	0.115859	1.28334			26.3746
14	Rep 3 NINL(1-1062) Infected +EtOH_0005_Cell 5	895542	95993.4	0.10719	1084.19	95.052	0.0876707	1.22265			17.1534
15	Rep 3 NINL(1-1062) Infected +EtOH_0005_Cell 6	899489	90997.4	0.101166	1204.08	95.052	0.0789413	1.28153			15.8146
16	Rep 3 NINL(1-1062) Infected +EtOH_0005_Cell 7	1.53638e+06	92556.3	0.0602432	1724.45	95.052	0.0551201	1.09294			6.72072
17	Rep 3 NINL(1-1062) Infected +EtOH_0006_Cell 1	1.50408e+06	142871	0.0949886	1010.99	95.052	0.0940188	1.01031			14.4419
18	Rep 3 NINL(1-1062) Infected +EtOH_0006_Cell 2	922343	81573.9	0.0884421	1221.36	95.052	0.0778247	1.13643			12.9871
19	Rep 3 NINL(1-1062) Infected +EtOH_0007_Cell 1	1.83778e+06	275808	0.150077	988.671	95.052	0.0961412	1.561			26.6837
20	Rep 3 NINL(1-1062) Infected +EtOH_0007_Cell 2	2.68971e+06	168373	0.0625991	1128.66	95.052	0.0842166	0.743311			7.24425
21	Rep 3 NINL(1-1062) Infected +EtOH_0008_Cell 1	702731	77409.3	0.110155	1335.07	95.052	0.0711964	1.5472			17.8122
22	Rep 3 NINL(1-1062) Infected +EtOH_0008_Cell 2	1.81896e+06	248958	0.136869	1789.39	95.052	0.0531198	2.5766			23.7486
23	Rep 3 NINL(1-1062) Infected +EtOH_0008_Cell 3	1.41936e+06	90674.1	0.0638836	1427.13	95.052	0.0666037	0.959161			7.5297
24	Rep 3 NINL(1-1062) Infected +EtOH_0008_Cell 4	2.90704e+06	131924	0.0453808	1477.14	95.052	0.0643486	0.705234			3.41796
25	Rep 3 NINL(1-1062) Infected +EtOH_0008_Cell 5	1.23217e+06	92014	0.0746761	1480.84	95.052	0.064188	1.1634			9.92803
26	Rep 3 NINL(1-1062) Infected +EtOH_0008_Cell 6	1.26444e+06	104743	0.082837	1495.12	95.052	0.0635747	1.30299			11.7416
27	Rep 3 NINL(1-1062) Infected +EtOH_0009_Cell 1	857332	175650	0.20488	715.244	95.052	0.132895	1.54167			38.8622
28	Rep 3 NINL(1-1062) Infected +EtOH_0009_Cell 2	639274	111353	0.174186	738.638	95.052	0.128685	1.35358			32.0414
29	Rep 3 NINL(1-1062) Infected +EtOH_0009_Cell 3	906896	189995	0.209501	904.004	95.052	0.105146	1.99248			39.889
30	Rep 3 NINL(1-1062) Infected +EtOH_0009_Cell 4	998245	101656	0.101835	906.592	95.052	0.104845	0.971285			15.9633
			Average	0.111871			Average	1.32894
NINL(1-1062)_No Infection_+EtOH (REP. 3)

## Sheet: NINL(1-1062)_CVB3_+Rapalog
Set	Name	Whole Cell Integrated Density	Centrosome Integrated Density	Percent Of Total Flourescence at Centrsome	Whole Cell Area	Centrosome Area	Percent of Total Area at Centrosome	Normalized Peroxisome Flourescence at Centrosome
NINL(1-1062)_No Infection_+EtOH (REP. 1)
1	÷	1.14805e+06	123152	0.107271	1237.33	95.052	0.0768205	1.39638
2	NINL(1-1062)_Infection_+Rapalog001_Cell 2	395265	73915.4	0.187002	629.301	95.052	0.151044	1.23807
3	NINL(1-1062)_Infection_+Rapalog001_Cell 3	377507	82293.7	0.217993	606.344	95.052	0.156762	1.39059
4	NINL(1-1062)_Infection_+Rapalog002_Cell 1	1.36282e+06	242476	0.177923	1186.1	95.052	0.0801381	2.2202
5	NINL(1-1062)_Infection_+Rapalog002_Cell 2	921500	179844	0.195165	941.145	95.052	0.100996	1.9324
6	NINL(1-1062)_Infection_+Rapalog002_Cell 3	1.00918e+06	173806	0.172226	1100.8	95.052	0.0863483	1.99454
7	NINL(1-1062)_Infection_+Rapalog002_Cell 4	1.30562e+06	207708	0.159087	1373.48	95.052	0.069205	2.29878
8	NINL(1-1062)_Infection_+Rapalog002_Cell 5	1.3419e+06	184639	0.137595	1503.46	95.052	0.0632222	2.17637
9	NINL(1-1062)_Infection_+Rapalog003_Cell 1	1.99854e+06	353625	0.176942	982.957	95.052	0.0967001	1.8298
10	NINL(1-1062)_Infection_+Rapalog003_Cell 2	689504	115331	0.167267	483.597	95.052	0.196552	0.851006
11	NINL(1-1062)_Infection_+Rapalog003_Cell 3	1.00649e+06	200118	0.198828	1109.4	95.052	0.0856786	2.32062
12	NINL(1-1062)_Infection_+Rapalog003_Cell 4	938182	162736	0.173459	955.799	95.052	0.0994477	1.74423
13	NINL(1-1062)_Infection_+Rapalog004_Cell 1	1355438	232359	0.171427	977.747	95.052	0.0972153	1.76337
14	NINL(1-1062)_Infection_+Rapalog004_Cell 2	705651	132915	0.188359	1068.56	95.052	0.088953	2.11751
15	NINL(1-1062)_Infection_+Rapalog004_Cell 3	600272	118158	0.19684	530.417	95.052	0.179202	1.09842
16	NINL(1-1062)_Infection_+Rapalog004_Cell 4	1.59818e+06	251021	0.157067	1354.02	95.052	0.0701996	2.23743
17	NINL(1-1062)_Infection_+Rapalog006_Cell 1	1.0602e+06	157375	0.148438	773.056	95.052	0.122956	1.20724
18	NINL(1-1062)_Infection_+Rapalog006_Cell 2	986387	246759	0.250165	491.092	95.052	0.193552	1.29249
19	NINL(1-1062)_Infection_+Rapalog006_Cell 3	911034	213010	0.233811	930.624	95.052	0.102138	2.28917
20	NINL(1-1062)_Infection_+Rapalog006_Cell 4	490618	123871	0.252479	703.682	95.052	0.135078	1.86914
21	NINL(1-1062)_Infection_+Rapalog006_Cell 5	949648	224899	0.236824	859.268	95.052	0.11062	2.14088
22	NINL(1-1062)_Infection_+Rapalog006_Cell 6	863131	230765	0.267358	800.281	95.052	0.118773	2.25099
23	NINL(1-1062)_Infection_+Rapalog007_Cell 1	1.09782e+06	181608	0.165426	1047.69	95.052	0.0907251	1.82337
24	NINL(1-1062)_Infection_+Rapalog007_Cell 2	707472	115021	0.162581	804.717	95.052	0.118119	1.37642
25	NINL(1-1062)_Infection_+Rapalog007_Cell 3	632241	131522	0.208025	702.607	95.052	0.135285	1.53768
26	NINL(1-1062)_Infection_+Rapalog007_Cell 4	1.43118e+06	254165	0.177591	851.739	95.052	0.111598	1.59135
27	NINL(1-1062)_Infection_+Rapalog008_Cell 1	2.01845e+06	295820	0.146558	1379.03	95.052	0.0689267	2.12629
28	NINL(1-1062)_Infection_+Rapalog008_Cell 2	1.20384e+06	312489	0.259576	917.146	95.052	0.103639	2.50462
29	NINL(1-1062)_Infection_+Rapalog009_Cell 1	1.03764e+06	124477	0.119963	1019.26	95.052	0.0932562	1.28638
30	NINL(1-1062)_Infection_+Rapalog009_Cell 2	1.36559e+06	330035	0.24168	1009.91	95.052	0.094119	2.56782
			Average	0.188497			Average	1.81579
NINL(1-1062)_No Infection_+EtOH (REP. 2)
1	Set. 2 NINL(1-1062)_Infection_+Rapalog001_Cell 1	929539	214183	0.230419	755.376	95.052	0.125834	1.83113
2	Set. 2 NINL(1-1062)_Infection_+Rapalog001_Cell 2	1.40833e+06	301931	0.21439	1011.19	95.052	0.0940001	2.28074
3	Set. 2 NINL(1-1062)_Infection_+Rapalog001_Cell 3	1.40376e+06	178461	0.127131	1201.87	95.052	0.079087	1.60748
4	Set. 2 NINL(1-1062)_Infection_+Rapalog001_Cell 4	932462	253509	0.271871	964.975	95.052	0.098502	2.76005
5	Set. 2 NINL(1-1062)_Infection_+Rapalog001_Cell 5	961319	155765	0.162032	1008.03	95.052	0.0942947	1.71836
6	Set. 2 NINL(1-1062)_Infection_+Rapalog001_Cell 6	921949	182428	0.197872	1044.1	95.052	0.0910376	2.17352
7	Set. 2 NINL(1-1062)_Infection_+Rapalog002_Cell 1	926336	184359	0.19902	924.205	95.052	0.102847	1.9351
8	Set. 2 NINL(1-1062)_Infection_+Rapalog002_Cell 2	1.26796e+06	147467	0.116303	1593.37	95.052	0.0596548	1.9496
9	Set. 2 NINL(1-1062)_Infection_+Rapalog002_Cell 3	720491	155741	0.21616	629.637	95.052	0.150963	1.43187
10	Set. 2 NINL(1-1062)_Infection_+Rapalog003_Cell 1	989134	236806	0.239407	799.239	95.052	0.118928	2.01304
11	Set. 2 NINL(1-1062)_Infection_+Rapalog003_Cell 2	1.22765e+06	372073	0.303078	702.439	95.052	0.135317	2.23976
12	Set. 2 NINL(1-1062)_Infection_+Rapalog003_Cell 3	1.001e+06	219372	0.219152	874.83	95.052	0.108652	2.01701
13	Set. 2 NINL(1-1062)_Infection_+Rapalog004_Cell 1	1.64526e+06	362262	0.220186	976.436	95.052	0.0973459	2.26189
14	Set. 2 NINL(1-1062)_Infection_+Rapalog004_Cell 2	1.13674e+06	195379	0.171876	838.732	95.052	0.113328	1.51663
15	Set. 2 NINL(1-1062)_Infection_+Rapalog004_Cell 3	1.26791e+06	212330	0.167464	1153.06	95.052	0.0824344	2.03148
16	Set. 2 NINL(1-1062)_Infection_+Rapalog005_Cell 1	1.13492e+06	167793	0.147846	830.329	95.052	0.114475	1.29151
17	Set. 2 NINL(1-1062)_Infection_+Rapalog005_Cell 2	1.70956e+06	376522	0.220245	875.771	95.052	0.108535	2.02925
18	Set. 2 NINL(1-1062)_Infection_+Rapalog005_Cell 3	835988	152535	0.18246	888.711	95.052	0.106955	1.70596
19	Set. 2 NINL(1-1062)_Infection_+Rapalog005_Cell 4	1.0671e+06	163386	0.153112	884.51	95.052	0.107463	1.42479
20	Set. 2 NINL(1-1062)_Infection_+Rapalog005_Cell 5	954123	191854	0.201079	679.247	95.052	0.139937	1.43692
21	Set. 2 NINL(1-1062)_Infection_+Rapalog006_Cell 1	1.08366e+06	182537	0.168446	984.705	95.052	0.0965284	1.74504
22	Set. 2 NINL(1-1062)_Infection_+Rapalog006_Cell 2	1.80733e+06	364128	0.201473	1448.97	95.052	0.0655995	3.07126
23	Set. 2 NINL(1-1062)_Infection_+Rapalog006_Cell 3	720626	149717	0.20776	735.512	95.052	0.129232	1.60765
24	Set. 2 NINL(1-1062)_Infection_+Rapalog006_Cell 4	762234	132845	0.174284	785.223	95.052	0.121051	1.43975
25	Set. 2 NINL(1-1062)_Infection_+Rapalog006_Cell 5	1.05874e+06	235335	0.222279	676.524	95.052	0.140501	1.58205
			Average	0.197414			Average	1.88407
NINL(1-1062)_No Infection_+EtOH (REP. 3)
1	Set. 3 NINL(1-1062)_Infection_+Rapalog001_Cell 1	1.9851e+06	268962	0.13549	1007.06	95.052	0.094386	1.43549
2	Set. 3 NINL(1-1062)_Infection_+Rapalog001_Cell 2	1.01465e+06	266549	0.262702	881.519	95.052	0.107828	2.43631
3	Set. 3 NINL(1-1062)_Infection_+Rapalog001_Cell 3	544103	154445	0.283852	536.164	95.052	0.177282	1.60114
4	Set. 3 NINL(1-1062)_Infection_+Rapalog001_Cell 4	727572	106945	0.146989	946.455	95.052	0.100429	1.4636
5	Set. 3 NINL(1-1062)_Infection_+Rapalog002_Cell 1	725989	224295	0.308951	381.553	95.052	0.249119	1.24017
6	Set. 3 NINL(1-1062)_Infection_+Rapalog002_Cell 2	881425	141213	0.16021	924.44	95.052	0.102821	1.55814
7	Set. 3 NINL(1-1062)_Infection_+Rapalog002_Cell 3	1.16193e+06	163328	0.140566	730.941	95.052	0.130041	1.08094
8	Set. 3 NINL(1-1062)_Infection_+Rapalog003_Cell 1	1.91898e+06	399548	0.208209	1070.75	95.052	0.0887715	2.34544
9	Set. 3 NINL(1-1062)_Infection_+Rapalog003_Cell 2	1.09582e+06	214225	0.195492	938.994	95.052	0.101227	1.93122
10	Set. 3 NINL(1-1062)_Infection_+Rapalog003_Cell 3	1.18046e+06	246901	0.209156	784.349	95.052	0.121186	1.72591
11	Set. 3 NINL(1-1062)_Infection_+Rapalog003_Cell 4	2.09434e+06	506612	0.241896	952.136	95.052	0.0998303	2.42307
12	Set. 3 NINL(1-1062)_Infection_+Rapalog003_Cell 5	811692	208199	0.2565	495.764	95.052	0.191728	1.33783
13	Set. 3 NINL(1-1062)_Infection_+Rapalog006_Cell 1	2.75137e+06	301559	0.109603	1215.92	95.052	0.0781732	1.40206
14	Set. 3 NINL(1-1062)_Infection_+Rapalog006_Cell 2	2.09895e+06	444119	0.211592	942.086	95.052	0.100895	2.09714
15	Set. 3 NINL(1-1062)_Infection_+Rapalog006_Cell 3	1.53004e+06	171306	0.111962	905.584	95.052	0.104962	1.06669
16	Set. 3 NINL(1-1062)_Infection_+Rapalog006_Cell 4	2.29585e+06	372272	0.16215	1132.46	95.052	0.0839342	1.93187
17	Set. 3 NINL(1-1062)_Infection_+Rapalog006_Cell 5	1.25234e+06	356080	0.284331	664.021	95.052	0.143146	1.9863
18	Set. 3 NINL(1-1062)_Infection_+Rapalog007_Cell 1	1.34788e+06	152892	0.113431	1629.2	95.052	0.0583428	1.94421
19	Set. 3 NINL(1-1062)_Infection_+Rapalog007_Cell 2	1.0397e+06	145598	0.140039	1005.61	95.052	0.0945216	1.48155
20	Set. 3 NINL(1-1062)_Infection_+Rapalog007_Cell 3	1.01854e+06	119316	0.117144	1257.86	95.052	0.0755663	1.55021
21	Set. 3 NINL(1-1062)_Infection_+Rapalog007_Cell 4	980561	127619	0.130149	948.674	95.052	0.100195	1.29896
22	Set. 3 NINL(1-1062)_Infection_+Rapalog008_Cell 1	1.49928e+06	500997	0.334158	732.655	95.052	0.129736	2.57567
23	Set. 3 NINL(1-1062)_Infection_+Rapalog008_Cell 2	1.99226e+06	488971	0.245436	915.029	95.052	0.103879	2.36272
24	Set. 3 NINL(1-1062)_Infection_+Rapalog008_Cell 3	1.04361e+06	143222	0.137237	617.234	95.052	0.153997	0.891167
25	Set. 3 NINL(1-1062)_Infection_+Rapalog009_Cell 1	1.02515e+06	186249	0.18168	1035.39	95.052	0.0918031	1.97902
26	Set. 3 NINL(1-1062)_Infection_+Rapalog009_Cell 2	746440	232475	0.311445	543.861	95.052	0.174773	1.782
27	Set. 3 NINL(1-1062)_Infection_+Rapalog009_Cell 3	1.12074e+06	232475	0.20743	1143.18	95.052	0.0831469	2.49474
			Average	0.198067			Average	1.75643
NINL(1-1062)_No Infection_+EtOH (REP. 3)

## Sheet: ∆NINL(1-1062)_CVB3_+EtOH
Set	Name	Whole Cell Integrated Density	Centrosome Integrated Density	Percent Of Total Flourescence at Centrsome	Whole Cell Area	Centrosome Area	Percent of Total Area at Centrosome	Normalized Peroxisome Flourescence at Centrosome
NINL(1-1062)_No Infection_+EtOH (REP. 1)
1	∆NINL(1-1062)+CVB3+EtOH_001_Cell 1	1.76978e+06	162996	0.0920996	1100.46	95.052	0.0863747	1.06628
2	∆NINL(1-1062)+CVB3+EtOH_001_Cell 2	1.27907e+06	142357	0.111298	1099.42	95.052	0.0864566	1.28733
3	∆NINL(1-1062)+CVB3+EtOH_001_Cell 3	911501	111527	0.122355	845.387	95.052	0.112436	1.08822
4	∆NINL(1-1062)+CVB3+EtOH_001_Cell 4	2.18759e+06	242543	0.110872	1923.63	95.052	0.0494128	2.2438
5	∆NINL(1-1062)+CVB3+EtOH_002_Cell 1	1.00624e+06	92701.3	0.0921266	1285.93	95.052	0.0739171	1.24635
6	∆NINL(1-1062)+CVB3+EtOH_002_Cell 2	1.28226e+06	138780	0.108231	1194.54	95.052	0.0795721	1.36016
7	∆NINL(1-1062)+CVB3+EtOH_002_Cell 3	2.46501e+06	257498	0.104461	1183.18	95.052	0.0803362	1.3003
8	∆NINL(1-1062)+CVB3+EtOH_002_Cell 4	997289	107508	0.1078	625.436	95.052	0.151977	0.70932
9	∆NINL(1-1062)+CVB3+EtOH_003_Cell 1	1.79556e+06	224852	0.125227	1083.92	95.052	0.0876924	1.42802
10	∆NINL(1-1062)+CVB3+EtOH_003_Cell 2	1.72261e+06	183068	0.106274	980.671	95.052	0.0969255	1.09645
11	∆NINL(1-1062)+CVB3+EtOH_003_Cell 3	1.19126e+06	135742	0.113949	1072.53	95.052	0.088624	1.28575
12	∆NINL(1-1062)+CVB3+EtOH_004_Cell 1	1.7409e+06	202459	0.116295	1277.93	95.052	0.0743798	1.56353
13	∆NINL(1-1062)+CVB3+EtOH_004_Cell 2	1.44378e+06	124404	0.0861656	1740.11	95.052	0.054624	1.57743
14	∆NINL(1-1062)+CVB3+EtOH_005_Cell 1	974362	91330.7	0.0937338	1201.73	95.052	0.0790958	1.18507
15	∆NINL(1-1062)+CVB3+EtOH_005_Cell 2	2.73978e+06	223314	0.0815082	1579.08	95.052	0.0601944	1.35408
16	∆NINL(1-1062)+CVB3+EtOH_006_Cell 1	1.94484e+06	198865	0.102252	1255.64	95.052	0.0756998	1.35076
17	∆NINL(1-1062)+CVB3+EtOH_006_Cell 2	1.72748e+06	138625	0.0802468	1061.2	95.052	0.08957	0.895912
18	∆NINL(1-1062)+CVB3+EtOH_007_Cell 1	1.60783e+06	139871	0.0869934	1232.35	95.052	0.0771306	1.12787
19	∆NINL(1-1062)+CVB3+EtOH_007_Cell 2	777693	122736	0.157821	699.582	95.052	0.13587	1.16156
20	∆NINL(1-1062)+CVB3+EtOH_008_Cell 1	1.26917e+06	125677	0.0990234	983.831	95.052	0.0966142	1.02494
21	∆NINL(1-1062)+CVB3+EtOH_008_Cell 2	1.95598e+06	135687	0.0693704	940.943	95.052	0.101018	0.686715
22	∆NINL(1-1062)+CVB3+EtOH_008_Cell 3	2.77717e+06	210589	0.0758285	1196.79	95.052	0.0794224	0.95475
23	∆NINL(1-1062)+CVB3+EtOH_008_Cell 4	1.53406e+06	286480	0.186746	737.697	95.052	0.12885	1.44933
24	∆NINL(1-1062)+CVB3+EtOH_009_Cell 1	1.64818e+06	104107	0.0631648	1319.47	95.052	0.072038	0.876826
25	∆NINL(1-1062)+CVB3+EtOH_009_Cell 2	1.23941e+06	201630	0.162682	817.826	95.052	0.116225	1.39971
26	∆NINL(1-1062)+CVB3+EtOH_009_Cell 3	2.24263e+06	388744	0.173343	1146.41	95.052	0.0829129	2.09067
27	∆NINL(1-1062)+CVB3+EtOH_009_Cell 4	1.96867e+06	231904	0.117798	942.724	95.052	0.100827	1.16832
28	∆NINL(1-1062)+CVB3+EtOH_010_Cell 1	1.93934e+06	228134	0.117635	1291.94	95.052	0.0735728	1.59889
29	∆NINL(1-1062)+CVB3+EtOH_010_Cell 2	1.61232e+06	215227	0.133489	1175.31	95.052	0.0808738	1.65058
			Average	0.109475			Average	1.27065
NINL(1-1062)_No Infection_+EtOH (REP. 2)
1	Rep 2 ∆NINL(1-1062)+CVB3+EtOH_001_Cell 1	1.42278e+06	106419	0.0747968	1113.94	95.052	0.0853296	0.876563
2	Rep 2 ∆NINL(1-1062)+CVB3+EtOH_001_Cell 2	1.07352e+06	84455.9	0.0786718	1465.65	95.052	0.0648533	1.21307
3	Rep 2 ∆NINL(1-1062)+CVB3+EtOH_002_Cell 1	1.13308e+06	161598	0.142618	797.995	95.052	0.119114	1.19733
4	Rep 2 ∆NINL(1-1062)+CVB3+EtOH_002_Cell 2	1.24588e+06	153894	0.123523	1022.35	95.052	0.0929741	1.32857
5	Rep 2 ∆NINL(1-1062)+CVB3+EtOH_002_Cell 3	1.53727e+06	147152	0.0957228	1346.83	95.052	0.0705746	1.35634
6	Rep 2 ∆NINL(1-1062)+CVB3+EtOH_002_Cell 4	729677	81037.9	0.11106	1010.35	95.052	0.0940783	1.18051
7	Rep 2 ∆NINL(1-1062)+CVB3+EtOH_003_Cell 1	1.6548e+06	119904	0.0724586	1040.37	95.052	0.0913641	0.793075
8	Rep 2 ∆NINL(1-1062)+CVB3+EtOH_003_Cell 2	1.43322e+06	169459	0.118237	1056.43	95.052	0.0899746	1.31411
9	Rep 2 ∆NINL(1-1062)+CVB3+EtOH_004_Cell 1	2.3359e+06	172484	0.0738405	1586.34	95.052	0.0599189	1.23234
10	Rep 2 ∆NINL(1-1062)+CVB3+EtOH_004_Cell 2	1.70066e+06	146610	0.0862077	1167.11	95.052	0.0814421	1.05852
11	Rep 2 ∆NINL(1-1062)+CVB3+EtOH_004_Cell 3	1.72673e+06	174986	0.10134	972.168	95.052	0.0977732	1.03648
12	Rep 2 ∆NINL(1-1062)+CVB3+EtOH_005_Cell 1	1.95908e+06	149166	0.0761408	1323.67	95.052	0.0718093	1.06032
13	Rep 2 ∆NINL(1-1062)+CVB3+EtOH_005_Cell 2	1.82836e+06	146020	0.0798642	1204.76	95.052	0.0788972	1.01226
14	Rep 2 ∆NINL(1-1062)+CVB3+EtOH_005_Cell 3	678689	127382	0.187688	502.923	95.052	0.188999	0.993063
15	Rep 2 ∆NINL(1-1062)+CVB3+EtOH_005_Cell 4	1.11338e+06	189063	0.16981	568.061	95.052	0.167327	1.01484
16	Rep 2 ∆NINL(1-1062)+CVB3+EtOH_006_Cell 1	986186	99469.6	0.100863	1010.48	95.052	0.0940658	1.07226
17	Rep 2 ∆NINL(1-1062)+CVB3+EtOH_006_Cell 2	1.18914e+06	156765	0.13183	952.001	95.052	0.0998444	1.32035
18	Rep 2 ∆NINL(1-1062)+CVB3+EtOH_006_Cell 3	1.68662e+06	191674	0.113643	934.322	95.052	0.101734	1.11707
19	Rep 2 ∆NINL(1-1062)+CVB3+EtOH_006_Cell 4	1.55174e+06	132266	0.0852369	1006.59	95.052	0.0944301	0.902646
20	Rep 2 ∆NINL(1-1062)+CVB3+EtOH_007_Cell 1	2.57971e+06	183320	0.0710623	1232.92	95.052	0.0770948	0.921751
21	Rep 2 ∆NINL(1-1062)+CVB3+EtOH_008_Cell 1	664332	36930.6	0.0555906	1232.92	95.052	0.0770948	0.721068
22	Rep 2 ∆NINL(1-1062)+CVB3+EtOH_008_Cell 2	1.48032e+06	87171.7	0.058887	1158.74	95.052	0.0820303	0.717869
23	Rep 2 ∆NINL(1-1062)+CVB3+EtOH_008_Cell 3	1.20826e+06	150296	0.12439	787.206	95.052	0.120746	1.03018
24	Rep 2 ∆NINL(1-1062)+CVB3+EtOH_008_Cell 4	1.56021e+06	159323	0.102117	953.581	95.052	0.099679	1.02446
25	Rep 2 ∆NINL(1-1062)+CVB3+EtOH_009_Cell 1	1.9794e+06	130733	0.0660468	1491.86	95.052	0.0637136	1.03662
26	Rep 2 ∆NINL(1-1062)+CVB3+EtOH_009_Cell 2	2.72296e+06	188681	0.0692927	1331.1	95.052	0.0714086	0.970369
27	Rep 2 ∆NINL(1-1062)+CVB3+EtOH_009_Cell 3	2.13875e+06	136245	0.0637028	1466.49	95.052	0.0648162	0.982823
28	Rep 2 ∆NINL(1-1062)+CVB3+EtOH_009_Cell 4	1.18845e+06	186044	0.156543	789.491	95.052	0.120397	1.30023
29	Rep 2 ∆NINL(1-1062)+CVB3+EtOH_009_Cell 5	1.40473e+06	138454	0.0985625	869.183	95.052	0.109358	0.901284
			Average	0.100066			Average	1.06127
NINL(1-1062)_No Infection_+EtOH (REP. 3)
1	Rep 3 ∆NINL(1-1062)+CVB3+EtOH_001_Cell 1	1.16166e+06	162466	0.139857	709.867	95.052	0.133901	1.04448
2	Rep 3 ∆NINL(1-1062)+CVB3+EtOH_001_Cell 2	1.24994e+06	222079	0.177671	711.85	95.052	0.133528	1.33059
3	Rep 3 ∆NINL(1-1062)+CVB3+EtOH_001_Cell 3	1.25953e+06	137992	0.109558	913.617	95.052	0.104039	1.05304
4	Rep 3 ∆NINL(1-1062)+CVB3+EtOH_001_Cell 4	689927	139670	0.202441	517.712	95.052	0.1836	1.10262
5	Rep 3 ∆NINL(1-1062)+CVB3+EtOH_001_Cell 5	730664	116146	0.15896	616.596	95.052	0.154156	1.03116
6	Rep 3 ∆NINL(1-1062)+CVB3+EtOH_001_Cell 6	1.61289e+06	157220	0.097477	1121.7	95.052	0.0847389	1.15032
7	Rep 3 ∆NINL(1-1062)+CVB3+EtOH_002_Cell 1	1.05848e+06	138390	0.130744	836.177	95.052	0.113674	1.15017
8	Rep 3 ∆NINL(1-1062)+CVB3+EtOH_002_Cell 2	1.5583e+06	186083	0.119414	886.157	95.052	0.107263	1.11328
9	Rep 3 ∆NINL(1-1062)+CVB3+EtOH_002_Cell 3	1.62553e+06	171821	0.105702	998.721	95.052	0.0951737	1.11062
10	Rep 3 ∆NINL(1-1062)+CVB3+EtOH_002_Cell 4	589445	81744.4	0.13868	661.131	95.052	0.143772	0.964586
11	Rep 3 ∆NINL(1-1062)+CVB3+EtOH_002_Cell 5	472055	70801.6	0.149986	555.39	95.052	0.171145	0.876368
12	Rep 3 ∆NINL(1-1062)+CVB3+EtOH_002_Cell 6	1.57237e+06	126359	0.0803622	1147.18	95.052	0.082857	0.969891
13	Rep 3 ∆NINL(1-1062)+CVB3+EtOH_002_Cell 7	1.43797e+06	174410	0.121289	938.893	95.052	0.101238	1.19806
14	Rep 3 ∆NINL(1-1062)+CVB3+EtOH_003_Cell 1	1.46377e+06	129304	0.0883368	1223.88	95.052	0.0776644	1.13742
15	Rep 3 ∆NINL(1-1062)+CVB3+EtOH_003_Cell 2	1.33299e+06	135608	0.101732	1031.89	95.052	0.092114	1.10442
16	Rep 3 ∆NINL(1-1062)+CVB3+EtOH_003_Cell 3	2.39703e+06	138003	0.0575726	1884.37	95.052	0.0504422	1.14136
17	Rep 3 ∆NINL(1-1062)+CVB3+EtOH_003_Cell 4	950961	164210	0.172678	546.382	95.052	0.173966	0.992595
18	Rep 3 ∆NINL(1-1062)+CVB3+EtOH_003_Cell 5	1.85871e+06	189867	0.10215	1271.71	95.052	0.0747435	1.36667
19	Rep 3 ∆NINL(1-1062)+CVB3+EtOH_003_Cell 6	1.66127e+06	215942	0.129986	899.769	95.052	0.10564	1.23046
20	Rep 3 ∆NINL(1-1062)+CVB3+EtOH_004_Cell 1	203976	9511.82	0.0466321	933.781	95.052	0.101793	0.458109
21	Rep 3 ∆NINL(1-1062)+CVB3+EtOH_005_Cell 1	230293	13374.4	0.0580755	1030.41	95.052	0.0922466	0.629567
22	Rep 3 ∆NINL(1-1062)+CVB3+EtOH_005_Cell 2	253097	7511.72	0.0296792	995.213	95.052	0.0955092	0.310747
23	Rep 3 ∆NINL(1-1062)+CVB3+EtOH_006_Cell 1	942814	39845.3	0.0422621	1528.19	95.052	0.0621991	0.679465
24	Rep 3 ∆NINL(1-1062)+CVB3+EtOH_006_Cell 2	672356	59560	0.0885841	1348.13	95.052	0.0705066	1.25639
25	Rep 3 ∆NINL(1-1062)+CVB3+EtOH_006_Cell 3	755335	87229.4	0.115484	1556.45	95.052	0.0610695	1.89103
26	Rep 3 ∆NINL(1-1062)+CVB3+EtOH_007_Cell 1	124816	10468.9	0.0838751	1596.98	95.052	0.0595199	1.40919
27	Rep 3 ∆NINL(1-1062)+CVB3+EtOH_007_Cell 2	122439	10268.2	0.0838638	1658.93	95.052	0.0572972	1.46366
			Average	0.108632			Average	1.08023
NINL(1-1062)_No Infection_+EtOH (REP. 3)

## Sheet: ∆NINL(1-1062)_CVB3_+Rapalog
Set	Name	Whole Cell Integrated Density	Centrosome Integrated Density	Percent Of Total Flourescence at Centrsome	Whole Cell Area	Centrosome Area	Percent of Total Area at Centrosome	Normalized Peroxisome Flourescence at Centrosome
NINL(1-1062)_No Infection_+EtOH (REP. 1)
1	∆NINL(1-1062) +CVB3+Rapalog_001_cell 1	1.49959e+06	362108	0.241471	1092.76	95.052	0.0869831	2.77607
2	∆NINL(1-1062) +CVB3+Rapalog_002_cell 1	4.61915e+06	1.00016e+06	0.216524	2384.64	95.052	0.0398601	5.43211
3	∆NINL(1-1062) +CVB3+Rapalog_002_cell 2	1.58966e+06	399256	0.251158	1633.87	95.052	0.058176	4.31721
4	∆NINL(1-1062) +CVB3+Rapalog_003_cell 1	668883	146994	0.21976	711.816	95.052	0.133535	1.64572
5	∆NINL(1-1062) +CVB3+Rapalog_003_cell 2	880756	175177	0.198894	732.756	95.052	0.129718	1.53327
6	∆NINL(1-1062) +CVB3+Rapalog_003_cell 3	1.06747e+06	294649	0.276027	863.772	95.052	0.110043	2.50835
7	∆NINL(1-1062) +CVB3+Rapalog_004_cell 1	952156	415404	0.436277	831.236	95.052	0.11435	3.81527
8	∆NINL(1-1062) +CVB3+Rapalog_004_cell 2	453538	152593	0.33645	581.943	95.052	0.163336	2.05987
9	∆NINL(1-1062) +CVB3+Rapalog_004_cell 3	1.2278e+06	288898	0.235298	957.883	95.052	0.0992313	2.37121
10	∆NINL(1-1062) +CVB3+Rapalog_004_cell 4	1.38056e+06	394891	0.286036	1167.65	95.052	0.0814045	3.51376
11	∆NINL(1-1062) +CVB3+Rapalog_004_cell 5	1.84259e+06	673098	0.365299	1321.49	95.052	0.071928	5.07868
12	∆NINL(1-1062) +CVB3+Rapalog_005_cell 1	782135	125513	0.223434	857.621	95.052	0.110832	2.01597
13	∆NINL(1-1062) +CVB3+Rapalog_005_cell 2	845876	188998	0.400777	752.654	95.052	0.126289	3.17349
14	∆NINL(1-1062) +CVB3+Rapalog_005_cell 3	1.30551e+06	523217	0.400777	874.158	95.052	0.108735	3.6858
15	∆NINL(1-1062) +CVB3+Rapalog_005_cell 4	776349	282127	0.363402	1017.64	95.052	0.093404	3.89065
16	∆NINL(1-1062) +CVB3+Rapalog_005_cell 5	1.46532e+06	298103	0.203439	1429.95	95.052	0.0664722	3.06051
17	∆NINL(1-1062) +CVB3+Rapalog_006_cell 1	839292	198146	0.236087	1192.39	95.052	0.0797157	2.96161
18	∆NINL(1-1062) +CVB3+Rapalog_006_cell 2	713136	140187	0.196578	939.464	95.052	0.101177	1.94292
19	∆NINL(1-1062) +CVB3+Rapalog_006_cell 3	517777	185974	0.359177	732.453	95.052	0.129772	2.76775
20	∆NINL(1-1062) +CVB3+Rapalog_006_cell 4	1.083e+06	213968	0.197569	766.804	95.052	0.123959	1.59383
21	∆NINL(1-1062) +CVB3+Rapalog_006_cell 5	550884	265275	0.481545	506.923	95.052	0.187508	2.56813
22	∆NINL(1-1062) +CVB3+Rapalog_006_cell 6	865906	228426	0.2638	1058.35	95.052	0.0898118	2.93726
23	∆NINL(1-1062) +CVB3+Rapalog_006_cell 7	940187	282348	0.300311	1097.5	95.052	0.0866074	3.46749
24	∆NINL(1-1062) +CVB3+Rapalog_007_cell 1	1.53129e+06	423041	0.276264	735.982	95.052	0.12915	2.1391
25	∆NINL(1-1062) +CVB3+Rapalog_007_cell 2	972202	348694	0.358665	1041.64	95.052	0.0912521	3.93048
26	∆NINL(1-1062) +CVB3+Rapalog_007_cell 3	815274	194431	0.238486	867.368	95.052	0.109587	2.17623
			Average	0.290904			Average	2.97549
NINL(1-1062)_No Infection_+EtOH (REP. 2)
1	Rep. 2 ∆NINL(1-1062) +CVB3+Rapalog_001_cell 1	771380	182182	0.236176	1344.08	95.052	0.0707193	3.33963
2	Rep. 2 ∆NINL(1-1062) +CVB3+Rapalog_001_cell 2	892198	330799	0.370768	1183.48	95.052	0.0803156	4.61639
3	Rep. 2 ∆NINL(1-1062) +CVB3+Rapalog_001_cell 3	1.77577e+06	550864	0.310211	847.37	95.052	0.112173	2.76547
4	Rep. 2 ∆NINL(1-1062) +CVB3+Rapalog_001_cell 4	1.7376e+06	544678	0.313466	856.915	95.052	0.110923	2.82596
5	Rep. 2 ∆NINL(1-1062) +CVB3+Rapalog_001_cell 5	790901	185752	0.234861	683.516	95.052	0.139063	1.68888
6	Rep. 2 ∆NINL(1-1062) +CVB3+Rapalog_002_cell 1	986232	229080	0.232278	1593.37	95.052	0.0596548	3.8937
7	Rep. 2 ∆NINL(1-1062) +CVB3+Rapalog_002_cell 2	1.27073e+06	280332	0.220607	1408.27	95.052	0.0674955	3.26847
8	Rep. 2 ∆NINL(1-1062) +CVB3+Rapalog_002_cell 3	674591	179582	0.266209	757.527	95.052	0.125477	2.12158
9	Rep. 2 ∆NINL(1-1062) +CVB3+Rapalog_002_cell 4	540253	152730	0.282701	646.241	95.052	0.147084	1.92203
10	Rep. 2 ∆NINL(1-1062) +CVB3+Rapalog_003_cell 1	1.1271e+06	253553	0.224959	1241.36	95.052	0.0765709	2.93792
11	Rep. 2 ∆NINL(1-1062) +CVB3+Rapalog_003_cell 2	611286	231972	0.379481	985.545	95.052	0.0964461	3.93465
12	Rep. 2 ∆NINL(1-1062) +CVB3+Rapalog_003_cell 3	337341	64575	0.191423	557.339	95.052	0.170546	1.12241
13	Rep. 2 ∆NINL(1-1062) +CVB3+Rapalog_003_cell 4	1.7358e+06	639426	0.368375	1206.27	95.052	0.0787983	4.67491
14	Rep. 2 ∆NINL(1-1062) +CVB3+Rapalog_004_cell 1	2.76379e+06	728286	0.26351	1944.47	95.052	0.0488832	5.3906
15	Rep. 2 ∆NINL(1-1062) +CVB3+Rapalog_004_cell 2	711290	118105	0.166044	1316.24	95.052	0.0722145	2.29931
16	Rep. 2 ∆NINL(1-1062) +CVB3+Rapalog_004_cell 3	719234	158593	0.220503	1048.53	95.052	0.0906525	2.43239
17	Rep. 2 ∆NINL(1-1062) +CVB3+Rapalog_004_cell 4	1.10218e+06	436063	0.395636	940.372	95.052	0.101079	3.91412
18	Rep. 2 ∆NINL(1-1062) +CVB3+Rapalog_005_cell 1	759330	175250	0.230796	873.049	95.052	0.108874	2.11985
19	Rep. 2 ∆NINL(1-1062) +CVB3+Rapalog_005_cell 2	770706	216517	0.280934	1068.87	95.052	0.0889278	3.15912
20	Rep. 2 ∆NINL(1-1062) +CVB3+Rapalog_005_cell 3	656753	213417	0.324957	1217.36	95.052	0.0780804	4.16183
21	Rep. 2 ∆NINL(1-1062) +CVB3+Rapalog_006_cell 1	524412	142727	0.272165	990.99	95.052	0.0959162	2.83753
22	Rep. 2 ∆NINL(1-1062) +CVB3+Rapalog_006_cell 2	418765	173064	0.413272	781.828	95.052	0.121577	3.39927
23	Rep. 2 ∆NINL(1-1062) +CVB3+Rapalog_006_cell 3	170182	60185.4	0.353653	428.004	95.052	0.222082	1.59244
24	Rep. 2 ∆NINL(1-1062) +CVB3+Rapalog_006_cell 4	326911	117816	0.360392	550.752	95.052	0.172586	2.08819
25	Rep. 2 ∆NINL(1-1062) +CVB3+Rapalog_007_cell 1	1.19516e+06	411868	0.344613	1867.03	95.052	0.0509108	6.76896
26	Rep. 2 ∆NINL(1-1062) +CVB3+Rapalog_008_cell 1	1.06598e+06	314728	0.295246	1556.6	95.052	0.0610639	4.83504
27	Rep. 2 ∆NINL(1-1062) +CVB3+Rapalog_008_cell 2	1.02239e+06	282778	0.276586	1737.49	95.052	0.0547064	5.05583
28	Rep. 2 ∆NINL(1-1062) +CVB3+Rapalog_008_cell 3	1.20145e+06	245932	0.204695	1472.6	95.052	0.0645469	3.17127
29	Rep. 2 ∆NINL(1-1062) +CVB3+Rapalog_008_cell 4	574633	153893	0.267811	746.368	95.052	0.127353	2.1029
30	Rep. 2 ∆NINL(1-1062) +CVB3+Rapalog_008_cell 5	399196	112929	0.28289	626.612	95.052	0.151692	1.8649
			Average	0.29032			Average	3.17103
NINL(1-1062)_No Infection_+EtOH (REP. 3)
1	Rep. 3 ∆NINL(1-1062) +CVB3+Rapalog_002_cell 1	847011	250492	0.295736	1175.92	95.052	0.0808322	3.65865
2	Rep. 3 ∆NINL(1-1062) +CVB3+Rapalog_002_cell 2	579460	109245	0.188529	1234.1	95.052	0.0770214	2.44775
3	Rep. 3 ∆NINL(1-1062) +CVB3+Rapalog_002_cell 3	697590	128042	0.183549	939.599	95.052	0.101162	1.8144
4	Rep. 3 ∆NINL(1-1062) +CVB3+Rapalog_002_cell 4	476766	156920	0.329134	1065.47	95.052	0.0892112	3.68938
5	Rep. 3 ∆NINL(1-1062) +CVB3+Rapalog_002_cell 5	517564	119705	0.231286	957.883	95.052	0.0992313	2.33077
6	Rep. 3 ∆NINL(1-1062) +CVB3+Rapalog_002_cell 6	459081	128163	0.279172	1186.54	95.052	0.0801086	3.48492
7	Rep. 3 ∆NINL(1-1062) +CVB3+Rapalog_003_cell 1	1.61204e+06	347433	0.215523	1742	95.052	0.054565	3.94985
8	Rep. 3 ∆NINL(1-1062) +CVB3+Rapalog_003_cell 2	1.20256e+06	388506	0.323067	1030.11	95.052	0.0922734	3.50119
9	Rep. 3 ∆NINL(1-1062) +CVB3+Rapalog_003_cell 3	1.58577e+06	614268	0.387363	1444.37	95.052	0.0658086	5.88621
10	Rep. 3 ∆NINL(1-1062) +CVB3+Rapalog_003_cell 4	2.05407e+06	517520	0.251948	1342.43	95.052	0.070806	3.55828
11	Rep. 3 ∆NINL(1-1062) +CVB3+Rapalog_005_cell 1	432130	92683.4	0.214481	676.558	95.052	0.140493	1.52662
12	Rep. 3 ∆NINL(1-1062) +CVB3+Rapalog_005_cell 2	279321	109382	0.3916	386.897	95.052	0.245678	1.59396
13	Rep. 3 ∆NINL(1-1062) +CVB3+Rapalog_006_cell 1	2.00353e+06	398640	0.198969	1508.9	95.052	0.0629941	3.15853
14	Rep. 3 ∆NINL(1-1062) +CVB3+Rapalog_006_cell 2	458104	156847	0.342382	1098.91	95.052	0.0864962	3.95834
15	Rep. 3 ∆NINL(1-1062) +CVB3+Rapalog_006_cell 3	569552	220659	0.387425	1144.86	95.052	0.0830249	4.66637
16	Rep. 3 ∆NINL(1-1062) +CVB3+Rapalog_006_cell 4	750291	281067	0.374611	834.026	95.052	0.113968	3.28699
17	Rep. 3 ∆NINL(1-1062) +CVB3+Rapalog_007_cell 1	1.36777e+06	476635	0.348476	1177.23	95.052	0.0807421	4.31591
18	Rep. 3 ∆NINL(1-1062) +CVB3+Rapalog_007_cell 2	874076	210752	0.241114	631.418	95.052	0.150537	1.60169
19	Rep. 3 ∆NINL(1-1062) +CVB3+Rapalog_007_cell 3	784327	229064	0.292051	710.909	95.052	0.133705	2.1843
20	Rep. 3 ∆NINL(1-1062) +CVB3+Rapalog_007_cell 4	957547	222726	0.232601	745.36	95.052	0.127525	1.82396
21	Rep. 3 ∆NINL(1-1062) +CVB3+Rapalog_007_cell 5	906047	223143	0.246282	825.926	95.052	0.115085	2.14
22	Rep. 3 ∆NINL(1-1062) +CVB3+Rapalog_007_cell 6	1.20869e+06	245791	0.203353	1321.42	95.052	0.0719317	2.82703
23	Rep. 3 ∆NINL(1-1062) +CVB3+Rapalog_007_cell 7	966264	282785	0.292658	1123.01	95.052	0.0846401	3.45767
24	Rep. 3 ∆NINL(1-1062) +CVB3+Rapalog_008_cell 1	1.08849e+06	192476	0.176828	1096.6	95.052	0.0866791	2.04003
25	Rep. 3 ∆NINL(1-1062) +CVB3+Rapalog_008_cell 2	696845	213207	0.305961	821.422	95.052	0.115716	2.64406
26	Rep. 3 ∆NINL(1-1062) +CVB3+Rapalog_009_cell 1	900116	185550	0.206141	1243.78	95.052	0.0764219	2.6974
27	Rep. 3 ∆NINL(1-1062) +CVB3+Rapalog_009_cell 2	873473	181863	0.208206	703.212	95.052	0.135168	1.54035
28	Rep. 3 ∆NINL(1-1062) +CVB3+Rapalog_010_cell 1	1.45168e+06	379578	0.261474	1208.79	95.052	0.078634	3.32521
29	Rep. 3 ∆NINL(1-1062) +CVB3+Rapalog_010_cell 2	1.31499e+06	261044	0.198514	1276.18	95.052	0.0744817	2.66527
30	Rep. 3 ∆NINL(1-1062) +CVB3+Rapalog_010_cell 3	814999	209922	0.257573	957.883	95.052	0.0992313	2.59569
			Average	0.268867			Average	2.95499
NINL(1-1062)_No Infection_+EtOH (REP. 3)
