# Supplementary material for: Antiviral function and viral antagonism of the rapidly evolving dynein activating adaptor NINL
Source: eLife. 2022 Oct 12;11:e81606. doi: 10.7554/eLife.81606 (PMC9651953; doi:10.7554/eLife.81606)
Supplement: Supplementary file 1. — Statistics from PAML analyses on individual dynein, dynactin, and activating adaptor genes. [file elife-81606-supp1.xlsx]

## Sheet: Sheet1
Supplementary File 1: PAML results for all genes
				PAML Codon Frequency Model F61				PAML Codon Frequency Model F3x4
Function	Gene	# of primate sequences analyzed	Analyzed gene length (nt)	dN/dS from Model 0	Model 7 lnL	Model 8 lnL	pvalue (M7-M8)	dN/dS from Model 0	Model 7 lnL	Model 8 lnL	pvalue (M7-M8)
Dynein	DYNC1H1	15	13938	0.00879	-27235.8	-27235.8	0.971874	0.00894	-27518.4	-27518.4	0.995918
Dynein	DYNC1I1	20	1935	0.03646	-3482.11	-3482.02	0.905842	0.03827	-3551.24	-3551.22	0.982191
Dynein	DYNC1I2	19	1896	0.01623	-3197.2	-3197.2	1	0.0177	-3272.76	-3272.76	1
Dynein	DYNC1LI1	19	1569	0.1059	-2988.24	-2988.15	0.914235	0.1033	-3029.91	-3029.84	0.931108
Dynein	DYNC1LI2	20	1467	0.0663	-2804.46	-2804.46	1	0.06812	-2850.75	-2850.74	0.996281
Dynein	DYNLL1	19	267	0.02279	-435.246	-435.989	1	0.02357	-457.208	-457.208	1
Dynein	DYNLL2	21	267	0.0001	-345.97	-345.823	0.863535	0.0001	-379.845	-379.845	1
Dynein	DYNLRB1	17	288	0.01117	-445.374	-445.374	1	0.01554	-484.296	-484.296	1
Dynein	DYNLRB2	21	288	0.0488	-674.237	-674.172	0.936963	0.05812	-678.874	-678.828	0.954597
Dynein	DYNLT1	21	339	0.00853	-659.107	-659.108	1	0.00899	-689.403	-689.403	1
Dynein	DYNLT3	20	339	0.01305	-574.266	-574.266	1	0.01347	-599.893	-599.894	1
Dynactin	ACTR1A	20	1128	0.0001	-2115.69	-2115.7	1	0.0001	-2157.45	-2157.45	1
Dynactin	ACTR1B	19	1128	0.01837	-2469.54	-2468.07	0.228992	0.01821	-2518.6	-2517.26	0.260452
Dynactin	ACTR10	18	1251	0.09172	-2403.89	-2403.88	0.985099	0.09431	-2427.37	-2427.2	0.84016
Dynactin	CAPZA1	21	858	0.04384	-1460.58	-1460.32	0.769831	0.04821	-1486.55	-1486.33	0.8
Dynactin	CAPZA2	16	858	0.02894	-1334.55	-1334.55	1	0.03123	-1364.9	-1364.9	1
Dynactin	CAPZB	16	831	0.01609	-1403.67	-1403.67	1	0.01498	-1443.79	-1443.79	1
Dynactin	DCTN1	19	3828	0.05369	-7453.45	-7453.45	1	0.05313	-7642.79	-7642.79	1
Dynactin	DCTN2	21	1203	0.14107	-2246.54	-2246.55	1	0.1332	-2322.64	-2322.64	1
Dynactin	DCTN3	21	558	0.20431	-1276.19	-1276.01	0.835476	0.17904	-1290.81	-1290.81	1
Dynactin	DCTN4	19	1380	0.03472	-2656.59	-2656.59	1	0.03639	-2705.86	-2705.86	1
Dynactin	DCTN5	21	543	0.09961	-1087.15	-1085.63	0.218385	0.09835	-1115.59	-1115.59	1
Dynactin	DCTN6	19	570	0.03797	-1069.09	-1069.09	1	0.03858	-1092.73	-1092.73	1
Activating adaptor	BICD1	19	2922	0.03956	-5281.77	-5281.63	0.872084	0.03902	-5386.22	-5386.13	0.911287
Activating adaptor	BICD2	18	2460	0.01667	-5151.15	-5151.15	1	0.01607	-5351.92	-5351.93	1
Activating adaptor	BICDL1	16	1713	0.11371	-3198.97	-3198.97	1	0.09233	-3321.18	-3321.18	1
Activating adaptor	BICDL2	18	1521	0.17421	-3690.1	-3689.23	0.417143	0.14533	-3847.49	-3846.99	0.610882
Activating adaptor	CRACR2A	20	1119	0.32152	-2670.07	-2668.53	0.214051	0.28379	-2735.6	-2735.09	0.600862
Activating adaptor	HOOK1	19	2178	0.12391	-4136.26	-4136.2	0.941098	0.11387	-4201.4	-4201.4	0.998528
Activating adaptor	HOOK2	18	2151	0.12162	-4984.48	-4983.22	0.28185	0.10851	-5098.1	-5097.18	0.400278
Activating adaptor	HOOK3	19	2154	0.0459	-3759.82	-3759.77	0.94824	0.04236	-3840.51	-3840.51	0.990557
Activating adaptor	NIN	18	6264	0.34881	-13934.4	-13932.7	0.179064	0.28727	-14164.6	-14164.4	0.880634
Activating adaptor	NINL	19	3990	0.51944	-12341.4	-12335.5	0.00276309	0.4549	-12512.7	-12507.9	0.00833627
Activating adaptor	RAB11FIP3	14	2220	0.12142	-5065.99	-5065.49	0.606509	0.11764	-5154.65	-5154.35	0.73854
Activating adaptor	RAB45	18	2211	0.25277	-5156.28	-5155.81	0.625765	0.24451	-5200.55	-5199.87	0.504821
Activating adaptor	SPDL1	17	1815	0.35996	-3815.37	-3813.14	0.108197	0.32084	-3899.31	-3898.53	0.458428
