# Supplementary material for: Antiviral function and viral antagonism of the rapidly evolving dynein activating adaptor NINL
Source: eLife. 2022 Oct 12;11:e81606. doi: 10.7554/eLife.81606 (PMC9651953; doi:10.7554/eLife.81606)
Supplement: Supplementary file 2. — NINL codon positions and probability scores from PAML, FEL, and MEME analyses. [file elife-81606-supp2.xlsx]

## Sheet: Sheet1
Supplementary File 2: PAML/MEME/FEL results for positively selected codons within NINL
Codon	Human residue	PAML posterior probability (BEB, Codon model F61, >0.9 cutoff)	FEL p-value (<0.1 cutoff)	MEME p-value (<0.1 cutoff)
72	A	0.903
273	S			0.04
397	A			0.01
618	T			0.02
630	Q	0.904	0.0355	0.05
661	M			0.01
703	G	0.954	0.0983
762	E			0.08
780	E			0.04
795	R	0.926
822	L	0.905
840	Q	0.931
843	T	0.907		0.09
854	C			0.08
863	P	0.951	0.0302	0.04
866	G			0.09
867	R		0.0715	0.09
879	R	0.934
897	P			0.05
918	I		0.0967
925	P		0.0646	0.09
952	Q			0.07
968	C	0.905
1062	L	0.901	0.0567	0.08
1094	T	0.945
1115	D		0.0943
1168	A	0.962	0.0538	0.07
1169	Q		0.0817	0.09
1197	Q			0.09
1276	R	0.962	0.0628	0.08
