# Supplementary material for: Antiviral function and viral antagonism of the rapidly evolving dynein activating adaptor NINL
Source: eLife. 2022 Oct 12;11:e81606. doi: 10.7554/eLife.81606 (PMC9651953; doi:10.7554/eLife.81606)
Supplement: Supplementary file 3. — Statistics from PAML analyses on NINL full length, N-terminal domain only, and C-terminal domain only. [file elife-81606-supp3.xlsx]

## Sheet: Sheet1
Supplementary File 3: Regional PAML results for NINL
Codon model F61
NINL region	dN/dS	p-value (M7 vs M8)	% codons in positively selected rate class (PAML p1)	dN/dS for codons in positively selected rate class
Full length	0.51944	0.00276309	6.903	2.54801
N-term (1-702)	0.30799	0.701135	N/A	N/A
C-term (703-1382)	0.73857	0.000377959	10.772	2.7694
Codon model F3x4
NINL region	dN/dS	p-value (M7 vs M8)	% codons in positively selected rate class (PAML p1)	dN/dS for codons in positively selected rate class
Full length	0.4549	0.00833627	12.563	1.81855
N-term (1-702)	0.2633	1	N/A	N/A
C-term (703-1382)	0.64896	0.00190793	17.026	2.05712
