# Supplementary material for: Antiviral function and viral antagonism of the rapidly evolving dynein activating adaptor NINL
Source: eLife. 2022 Oct 12;11:e81606. doi: 10.7554/eLife.81606 (PMC9651953; doi:10.7554/eLife.81606)
Supplement: Supplementary file 4. — Results from DESeq comparison from RNAseq of indicated cell lines and under different induction conditions. [file elife-81606-supp4.xlsx]

## Sheet: NINL-KO-induced-vs-WT-induced
Ensembl Gene ID	Gene symbol	BaseMean	log2(FC)	StdErr	Wald-Stats	P-value	P-adj
ENSG00000000003	TSPAN6	3337.47	0.989128	0.0686845	14.401	5.09689e-47	3.48613e-46
ENSG00000000005	TNMD	3.65332	5.15836	1.66747	3.09353	0.00197793	0.00333754
ENSG00000000419	DPM1	1574.94	-0.159871	0.0696652	-2.29484	0.0217421	0.0328905
ENSG00000000457	SCYL3	349.424	0.307752	0.129394	2.3784	0.0173877	0.0266443
ENSG00000000460	C1orf112	1169.35	0.644214	0.0892089	7.22141	5.14523e-13	1.47325e-12
ENSG00000000938	FGR	0
ENSG00000000971	CFH	1385.58	-7.99327	0.256359	-31.18	1.99118e-213	7.08088e-212
ENSG00000001036	FUCA2	3396.4	0.0610412	0.0512417	1.19124	0.233559	0.296293
ENSG00000001084	GCLC	6469.27	-2.87112	0.0854444	-33.6023	1.5545e-247	6.57318e-246
ENSG00000001167	NFYA	1918.96	1.30268	0.0677335	19.2324	1.98227e-82	2.27563e-81
ENSG00000001460	STPG1	388.098	-0.17595	0.125454	-1.4025	0.160766	0.211832
ENSG00000001461	NIPAL3	922.744	-0.0186999	0.0870682	-0.214773	0.829944	0.863821
ENSG00000001497	LAS1L	4606.54	-0.398312	0.0671146	-5.93481	2.9419e-09	7.12745e-09
ENSG00000001561	ENPP4	494.119	1.82476	0.117238	15.5646	1.26726e-54	9.8099e-54
ENSG00000001617	SEMA3F	271.977	0.245658	0.194517	1.26292	0.20662	0.265707
ENSG00000001626	CFTR	2.0779	-2.99991	1.82038	-1.64796	0.0993618	0.136052
ENSG00000001629	ANKIB1	1943.33	-1.0911	0.11913	-9.15889	5.24348e-20	1.92089e-19
ENSG00000001630	CYP51A1	6395.11	-0.213277	0.0540505	-3.94589	7.95045e-05	0.000150182
ENSG00000001631	KRIT1	1273.81	0.171702	0.0888182	1.93318	0.0532136	0.0762842
ENSG00000002016	RAD52	318.968	-0.237202	0.152502	-1.5554	0.119851	0.16198
ENSG00000002079	MYH16	8.13349	-5.25174	1.42906	-3.67496	0.000237887	0.000434636
ENSG00000002330	BAD	1019.36	-0.599287	0.105652	-5.67227	1.40921e-08	3.305e-08
ENSG00000002549	LAP3	4468.21	-0.46962	0.0542537	-8.65599	4.88655e-18	1.67731e-17
ENSG00000002586	CD99	7786.12	0.282114	0.0686064	4.11207	3.92131e-05	7.55254e-05
ENSG00000002587	HS3ST1	66.557	-5.6244	0.63896	-8.80244	1.33877e-18	4.67662e-18
ENSG00000002726	AOC1	0.510343	0.943723	3.93986	0.239532	0.810693
ENSG00000002745	WNT16	1.51913	3.89355	2.18845	1.77913	0.0752179	0.10522
ENSG00000002746	HECW1	387.513	-7.02309	0.576684	-12.1784	4.051e-34	2.14976e-33
ENSG00000002822	MAD1L1	856.479	0.599449	0.119158	5.03069	4.88705e-07	1.05511e-06
ENSG00000002834	LASP1	23772.4	-4.12922	0.0439658	-93.9189	0	0
ENSG00000002919	SNX11	981.297	-0.646279	0.0920732	-7.01919	2.23164e-12	6.21357e-12
ENSG00000002933	TMEM176A	0.390384	-2.21593	4.03552	-0.549107	0.582932
ENSG00000003056	M6PR	7949.8	-1.6012	0.0513013	-31.2116	7.40993e-214	2.6452e-212
ENSG00000003096	KLHL13	728.903	4.24513	0.14261	29.7674	1.03368e-194	3.25775e-193
ENSG00000003137	CYP26B1	453.252	-1.46348	0.140139	-10.4431	1.5764e-25	6.77535e-25
ENSG00000003147	ICA1	100.603	-0.711825	0.352805	-2.01761	0.0436315	0.0634494
ENSG00000003249	DBNDD1	1603.42	-1.04549	0.0807838	-12.9419	2.61198e-38	1.51567e-37
ENSG00000003393	ALS2	1556.85	0.0385348	0.10274	0.375073	0.707606	0.759178
ENSG00000003400	CASP10	466.364	0.395873	0.13631	2.90422	0.00368171	0.0060465
ENSG00000003402	CFLAR	2738.07	-3.12805	0.0705293	-44.3511	0	0
ENSG00000003436	TFPI	1393.2	-3.68797	0.0932292	-39.5581	0	0
ENSG00000003509	NDUFAF7	773.525	-0.39192	0.0924643	-4.2386	2.24915e-05	4.40272e-05
ENSG00000003756	RBM5	2709.28	2.04478	0.102271	19.9937	6.25355e-89	7.72867e-88
ENSG00000003987	MTMR7	57.0994	7.37061	1.05972	6.95523	3.51976e-12	9.71413e-12
ENSG00000003989	SLC7A2	1186.3	3.11222	0.105916	29.3839	8.81425e-190	2.69998e-188
ENSG00000004059	ARF5	3379.89	0.275139	0.0743979	3.69821	0.000217128	0.000397804
ENSG00000004139	SARM1	964.896	1.21941	0.097914	12.4539	1.33211e-35	7.27934e-35
ENSG00000004142	POLDIP2	7532.01	-0.514327	0.0566629	-9.07696	1.1165e-19	4.05191e-19
ENSG00000004399	PLXND1	1792.8	-2.74776	0.11005	-24.9683	1.35149e-137	2.75084e-136
ENSG00000004455	AK2	10137.3	1.25816	0.051838	24.271	3.97197e-130	7.48544e-129
ENSG00000004468	CD38	596.515	-9.35677	0.524704	-17.8325	3.95576e-71	3.94153e-70
ENSG00000004478	FKBP4	11211.3	-0.0837233	0.0514393	-1.62761	0.103607	0.141374
ENSG00000004487	KDM1A	4635.87	0.520127	0.0468683	11.0976	1.28815e-28	6.04141e-28
ENSG00000004534	RBM6	2394.97	1.50026	0.0605643	24.7714	1.82381e-135	3.594e-134
ENSG00000004660	CAMKK1	668.051	-0.1122	0.0967961	-1.15914	0.246399	0.310579
ENSG00000004700	RECQL	2908.63	-0.844805	0.0895708	-9.4317	4.03477e-21	1.53259e-20
ENSG00000004766	VPS50	1007.81	0.194041	0.0943712	2.05615	0.039768	0.0582142
ENSG00000004776	HSPB6	6.80766	-0.803487	0.916524	-0.876668	0.380667	0.45248
ENSG00000004777	ARHGAP33	205.451	0.197389	0.218952	0.901521	0.367311	0.437975
ENSG00000004779	NDUFAB1	2268.95	-0.0898831	0.0806734	-1.11416	0.26521	0.331232
ENSG00000004799	PDK4	1053.13	-5.22784	0.14186	-36.8522	2.69476e-297	1.4211e-295
ENSG00000004809	SLC22A16	0.606707	2.56367	3.00973	0.851792	0.39433	0.465658
ENSG00000004838	ZMYND10	18.7054	0.318257	0.594726	0.535133	0.592558	0.656382
ENSG00000004846	ABCB5	5.4174	0.864798	1.03353	0.836744	0.402736	0.473884
ENSG00000004848	ARX	35.2487	-6.99229	1.16633	-5.9951	2.03366e-09	4.96329e-09
ENSG00000004864	SLC25A13	3086.97	-0.155699	0.055658	-2.79742	0.00515128	0.00834044
ENSG00000004866	ST7	1074.66	-0.026035	0.0809263	-0.321713	0.74767	0.792859
ENSG00000004897	CDC27	6216.96	-0.218407	0.0867814	-2.51674	0.0118445	0.018506
ENSG00000004939	SLC4A1	2.60729	0.0832068	1.38452	0.0600979	0.952078	0.962133
ENSG00000004948	CALCR	3.00149	0.749619	1.41641	0.529238	0.596641	0.660156
ENSG00000004961	HCCS	1829.11	-0.395188	0.0649383	-6.08559	1.16062e-09	2.86994e-09
ENSG00000004975	DVL2	2647.14	0.385079	0.0573243	6.71755	1.84799e-11	4.94654e-11
ENSG00000005001	PRSS22	1.66752	-1.7079	2.08982	-0.817249	0.413786	0.485133
ENSG00000005007	UPF1	3933.39	0.719938	0.0519233	13.8654	1.02651e-43	6.60033e-43
ENSG00000005020	SKAP2	2109.42	-0.0730707	0.0870189	-0.839711	0.401071	0.472347
ENSG00000005022	SLC25A5	27698.7	0.233726	0.0629583	3.71239	0.000205313	0.00037679
ENSG00000005059	MCUB	701.264	0.375951	0.148688	2.52845	0.0114568	0.0179319
ENSG00000005073	HOXA11	571.479	5.8881	0.23242	25.3338	1.3549e-141	2.87439e-140
ENSG00000005075	POLR2J	2142.16	-0.223867	0.101408	-2.20758	0.0272733	0.0407202
ENSG00000005100	DHX33	3159.14	-0.0135765	0.086044	-0.157785	0.874626	0.901767
ENSG00000005102	MEOX1	6.34447	5.96008	1.47603	4.03791	5.3929e-05	0.000103066
ENSG00000005108	THSD7A	492.519	-4.92984	0.196853	-25.0432	2.06912e-138	4.26295e-137
ENSG00000005156	LIG3	3287.91	0.54604	0.0727667	7.50398	6.19105e-14	1.83468e-13
ENSG00000005175	RPAP3	2741.71	0.291996	0.0737791	3.95771	7.56725e-05	0.000143133
ENSG00000005187	ACSM3	243.432	-3.03935	0.241739	-12.5729	2.97788e-36	1.65504e-35
ENSG00000005189	REXO5	237.65	0.546358	0.159472	3.42603	0.000612465	0.00108113
ENSG00000005194	CIAPIN1	2643.21	-0.102062	0.0678945	-1.50324	0.132777	0.17778
ENSG00000005206	SPPL2B	438.108	0.382017	0.123076	3.1039	0.00190988	0.00322829
ENSG00000005238	FAM214B	269.909	-2.6849	0.171156	-15.6869	1.85961e-55	1.45654e-54
ENSG00000005243	COPZ2	79.7622	-9.9108	1.20373	-8.23341	1.81959e-16	5.92267e-16
ENSG00000005249	PRKAR2B	848.29	1.45474	0.0889895	16.3473	4.54552e-60	3.82669e-59
ENSG00000005302	MSL3	1159.65	-0.29602	0.0788378	-3.75479	0.000173484	0.000320149
ENSG00000005339	CREBBP	3892.45	0.664484	0.0883781	7.51865	5.53461e-14	1.64382e-13
ENSG00000005379	TSPOAP1	0.915407	2.92243	2.69462	1.08455	0.278123	0.345245
ENSG00000005381	MPO	0
ENSG00000005421	PON1	4.06659	-5.56623	1.79809	-3.09564	0.00196387	0.00331563
ENSG00000005436	GCFC2	808.996	0.722375	0.0899863	8.02761	9.93922e-16	3.14153e-15
ENSG00000005448	WDR54	1471.12	-0.832912	0.0770101	-10.8156	2.90328e-27	1.31e-26
ENSG00000005469	CROT	549.881	-0.583812	0.107835	-5.41395	6.16489e-08	1.40209e-07
ENSG00000005471	ABCB4	12.0838	2.37235	0.748792	3.16823	0.00153368	0.00261166
ENSG00000005483	KMT2E	2113.72	-0.238199	0.10122	-2.35328	0.0186088	0.0284192
ENSG00000005486	RHBDD2	1824.43	-0.358816	0.103443	-3.46873	0.000522925	0.000928817
ENSG00000005513	SOX8	62.8385	2.69143	0.338303	7.95568	1.78144e-15	5.57841e-15
ENSG00000005700	IBTK	3645.54	-1.98092	0.0908687	-21.7998	2.33221e-105	3.46898e-104
ENSG00000005801	ZNF195	838.757	0.399407	0.0890964	4.48286	7.36493e-06	1.48491e-05
ENSG00000005810	MYCBP2	3587.08	1.68828	0.272158	6.20329	5.52938e-10	1.38612e-09
ENSG00000005812	FBXL3	2435.11	1.78992	0.0608146	29.4324	2.11694e-190	6.51688e-189
ENSG00000005844	ITGAL	20.3249	0.257388	0.662757	0.388359	0.697751	0.751383
ENSG00000005882	PDK2	842.834	1.13641	0.118805	9.56535	1.11818e-21	4.31532e-21
ENSG00000005884	ITGA3	17482.5	-7.09893	0.0894466	-79.3651	0	0
ENSG00000005889	ZFX	1580.24	0.483359	0.0948199	5.09765	3.4389e-07	7.48199e-07
ENSG00000005893	LAMP2	8396.76	0.111598	0.0608555	1.83382	0.0666803	0.094071
ENSG00000005961	ITGA2B	60.2692	1.5435	0.312847	4.93373	8.06733e-07	1.7223e-06
ENSG00000005981	ASB4	38.1723	-8.06955	1.23907	-6.51257	7.38741e-11	1.92791e-10
ENSG00000006007	GDE1	3851.05	-0.78644	0.0570496	-13.7852	3.12871e-43	1.99925e-42
ENSG00000006015	REX1BD	291.71	-0.550182	0.154151	-3.56911	0.00035819	0.00064598
ENSG00000006016	CRLF1	30.9329	3.2439	0.511286	6.34459	2.23019e-10	5.69138e-10
ENSG00000006025	OSBPL7	190.869	-0.788872	0.314061	-2.51184	0.0120103	0.0187556
ENSG00000006042	TMEM98	1542.99	0.333308	0.0721258	4.6212	3.81527e-06	7.82746e-06
ENSG00000006047	YBX2	19.912	1.89976	0.767249	2.47607	0.0132839	0.0206506
ENSG00000006059	KRT33A	0
ENSG00000006062	MAP3K14	2770.02	-4.92771	0.0896715	-54.9529	0	0
ENSG00000006071	ABCC8	36.0876	-0.265347	0.371318	-0.71461	0.47485	0.544854
ENSG00000006116	CACNG3	0
ENSG00000006118	TMEM132A	2507.55	-1.4436	0.079261	-18.2133	4.04823e-74	4.1795e-73
ENSG00000006125	AP2B1	18624.8	-1.00654	0.041847	-24.0529	7.77889e-128	1.43968e-126
ENSG00000006128	TAC1	3.15321	4.94908	1.79547	2.75642	0.00584375	0.00941727
ENSG00000006194	ZNF263	1409.57	0.0603522	0.0722371	0.835473	0.403451	0.474605
ENSG00000006210	CX3CL1	9.33255	-1.90492	0.809527	-2.35313	0.018616	0.0284279
ENSG00000006282	SPATA20	1953.48	-2.96405	0.0745775	-39.7446	0	0
ENSG00000006283	CACNA1G	295.854	-2.53195	0.212756	-11.9007	1.17379e-32	6.01243e-32
ENSG00000006327	TNFRSF12A	3157.53	-5.70376	0.124726	-45.7305	0	0
ENSG00000006377	DLX6	111.581	7.669	0.859157	8.92619	4.40925e-19	1.56768e-18
ENSG00000006432	MAP3K9	997.465	-0.803349	0.0940962	-8.53752	1.37131e-17	4.63505e-17
ENSG00000006451	RALA	1669.75	0.466651	0.0820722	5.68586	1.30157e-08	3.05953e-08
ENSG00000006453	BAIAP2L1	2502.71	-1.09806	0.0647391	-16.9612	1.58959e-64	1.45001e-63
ENSG00000006459	KDM7A	773.409	2.82511	0.118101	23.9211	1.84701e-126	3.3548e-125
ENSG00000006468	ETV1	207.383	-2.4992	0.225029	-11.1061	1.17139e-28	5.49939e-28
ENSG00000006530	AGK	2491.54	1.03508	0.0683193	15.1506	7.51066e-52	5.57013e-51
ENSG00000006534	ALDH3B1	4018.49	-9.96417	0.290892	-34.2539	3.81767e-257	1.67535e-255
ENSG00000006555	TTC22	0
ENSG00000006576	PHTF2	1471.35	0.103262	0.10187	1.01366	0.310745	0.379798
ENSG00000006606	CCL26	42.4313	-6.03774	0.732704	-8.24035	1.71706e-16	5.5958e-16
ENSG00000006607	FARP2	1797.97	0.604192	0.0915553	6.5992	4.13385e-11	1.08893e-10
ENSG00000006611	USH1C	66.2452	1.27956	0.276505	4.62763	3.69869e-06	7.5992e-06
ENSG00000006625	GGCT	1998.33	-0.198558	0.0754428	-2.6319	0.00849086	0.0134749
ENSG00000006634	DBF4	1734.57	0.260241	0.0807063	3.22455	0.00126172	0.00216204
ENSG00000006638	TBXA2R	50.7448	1.31491	0.401006	3.27902	0.00104167	0.00179857
ENSG00000006652	IFRD1	1814.98	0.088532	0.0704127	1.25733	0.208634	0.268075
ENSG00000006659	LGALS14	0
ENSG00000006695	COX10	973.27	-0.791067	0.0914579	-8.64953	5.17131e-18	1.77342e-17
ENSG00000006704	GTF2IRD1	849.171	0.203619	0.0885066	2.30061	0.0214136	0.032412
ENSG00000006712	PAF1	3780	0.0297752	0.0632792	0.470536	0.637972	0.69829
ENSG00000006715	VPS41	2336.19	-0.289294	0.0707845	-4.08696	4.37054e-05	8.39424e-05
ENSG00000006740	ARHGAP44	485.946	0.739476	0.136434	5.42001	5.9597e-08	1.35626e-07
ENSG00000006744	ELAC2	5881.02	0.0984914	0.0576008	1.7099	0.0872848	0.120925
ENSG00000006747	SCIN	50.3623	1.89786	0.427189	4.44268	8.88442e-06	1.78409e-05
ENSG00000006756	ARSD	485.399	-10.0197	0.842651	-11.8906	1.3238e-32	6.77521e-32
ENSG00000006757	PNPLA4	418.622	0.557102	0.129179	4.31263	1.61322e-05	3.18815e-05
ENSG00000006788	MYH13	0
ENSG00000006831	ADIPOR2	5347.24	-0.679914	0.047911	-14.1912	1.03869e-45	6.92074e-45
ENSG00000006837	CDKL3	42.1361	0.219645	0.403596	0.544219	0.586291	0.650877
ENSG00000007001	UPP2	0.147548	0.661057	4.08047	0.162005	0.871302
ENSG00000007038	PRSS21	2.04497	-3.44384	1.97788	-1.74118	0.0816528	0.113537
ENSG00000007047	MARK4	906.427	1.53735	0.127098	12.0958	1.11162e-33	5.82416e-33
ENSG00000007062	PROM1	2.31256	-0.235525	1.47666	-0.159499	0.873276	0.90094
ENSG00000007080	CCDC124	2501.45	0.713072	0.0877947	8.12204	4.58418e-16	1.4692e-15
ENSG00000007129	CEACAM21	0.295096	1.53494	4.03976	0.379957	0.703977
ENSG00000007168	PAFAH1B1	7225.07	-1.45437	0.0610118	-23.8375	1.36469e-125	2.46187e-124
ENSG00000007171	NOS2	69.5932	3.69285	0.371421	9.94249	2.71934e-23	1.09642e-22
ENSG00000007174	DNAH9	1.06573	-2.39767	2.61042	-0.9185	0.358357	0.42898
ENSG00000007202	KIAA0100	10514.6	-0.534063	0.0638829	-8.36003	6.2702e-17	2.07549e-16
ENSG00000007216	SLC13A2	1.64194	-2.86445	1.98464	-1.44331	0.148933	0.197459
ENSG00000007237	GAS7	149.863	1.27229	0.23387	5.44013	5.32412e-08	1.214e-07
ENSG00000007255	TRAPPC6A	365.046	-1.57784	0.152958	-10.3155	5.9979e-25	2.53504e-24
ENSG00000007264	MATK	314.662	6.76723	0.748372	9.04259	1.52996e-19	5.51578e-19
ENSG00000007306	CEACAM7	0.71052	-3.10599	3.43104	-0.905261	0.365327	0.436113
ENSG00000007312	CD79B	1.71196	-0.456849	2.04131	-0.223802	0.822911	0.858041
ENSG00000007314	SCN4A	35.3992	3.43246	0.651117	5.27165	1.35204e-07	3.00826e-07
ENSG00000007341	ST7L	495.217	1.45041	0.122206	11.8686	1.72272e-32	8.79022e-32
ENSG00000007350	TKTL1	14.619	7.16236	1.30999	5.4675	4.56432e-08	1.04589e-07
ENSG00000007372	PAX6	763.037	4.63522	0.144554	32.0657	1.32749e-225	5.06e-224
ENSG00000007376	RPUSD1	1419.8	0.581916	0.0913281	6.3717	1.8694e-10	4.79238e-10
ENSG00000007384	RHBDF1	347.31	-1.70119	0.140851	-12.0779	1.3818e-33	7.2234e-33
ENSG00000007392	LUC7L	1197.25	0.348548	0.0952057	3.661	0.000251234	0.000458164
ENSG00000007402	CACNA2D2	259.47	3.65177	0.225074	16.2247	3.37099e-59	2.8086e-58
ENSG00000007516	BAIAP3	32.5648	0.722311	0.501831	1.43935	0.150051	0.198857
ENSG00000007520	TSR3	1429.2	-0.32314	0.101623	-3.17978	0.00147386	0.00251441
ENSG00000007541	PIGQ	1110.13	-0.25946	0.0934319	-2.77699	0.0054864	0.00886063
ENSG00000007545	CRAMP1	1284.85	0.4841	0.111308	4.34921	1.36626e-05	2.71221e-05
ENSG00000007866	TEAD3	306.807	0.452174	0.131891	3.42839	0.00060717	0.00107219
ENSG00000007908	SELE	0.526635	2.33907	3.83232	0.610354	0.541627
ENSG00000007923	DNAJC11	2812.32	0.250205	0.0620106	4.03487	5.46325e-05	0.000104368
ENSG00000007933	FMO3	2.01497	-1.80481	1.92725	-0.936472	0.34903	0.419764
ENSG00000007944	MYLIP	247.05	0.654635	0.144677	4.52479	6.04545e-06	1.22553e-05
ENSG00000007952	NOX1	9.5552	-6.85001	1.38315	-4.95248	7.32739e-07	1.56739e-06
ENSG00000007968	E2F2	744.324	0.369081	0.0910294	4.05452	5.02365e-05	9.61778e-05
ENSG00000008018	PSMB1	6004.28	0.162735	0.0649896	2.50401	0.0122793	0.0191531
ENSG00000008056	SYN1	28.4125	3.33225	0.655145	5.08629	3.65138e-07	7.93498e-07
ENSG00000008083	JARID2	1583.34	1.68539	0.0790503	21.3205	7.32077e-101	1.03658e-99
ENSG00000008086	CDKL5	1060.22	-2.31403	0.177084	-13.0674	5.05492e-39	2.97887e-38
ENSG00000008118	CAMK1G	2.27156	-1.6531	1.44414	-1.1447	0.252335	0.317179
ENSG00000008128	CDK11A	554.109	-0.40403	0.117837	-3.42872	0.000606445	0.00107102
ENSG00000008130	NADK	1632.49	0.15455	0.0823032	1.87781	0.0604076	0.0857626
ENSG00000008196	TFAP2B	0
ENSG00000008197	TFAP2D	0
ENSG00000008226	DLEC1	1.57803	2.43303	1.98494	1.22574	0.220295	0.281604
ENSG00000008256	CYTH3	1738.97	-0.681109	0.0750838	-9.07131	1.17593e-19	4.26177e-19
ENSG00000008277	ADAM22	338.273	2.4621	0.508155	4.84518	1.26497e-06	2.66927e-06
ENSG00000008282	SYPL1	3907.82	-1.27546	0.0537232	-23.7413	1.35123e-124	2.42112e-123
ENSG00000008283	CYB561	955.33	-1.708	0.0917873	-18.6082	2.75734e-77	2.98104e-76
ENSG00000008294	SPAG9	6421.52	-0.501802	0.0541062	-9.27439	1.78636e-20	6.65735e-20
ENSG00000008300	CELSR3	428.75	-0.715233	0.134806	-5.30565	1.1227e-07	2.51335e-07
ENSG00000008311	AASS	782.827	5.86794	0.211322	27.7678	1.06371e-169	2.84929e-168
ENSG00000008323	PLEKHG6	1.40088	-2.59743	2.13221	-1.21819	0.223153	0.284642
ENSG00000008324	SS18L2	469.295	0.908559	0.127846	7.10666	1.18884e-12	3.35541e-12
ENSG00000008382	MPND	399.587	1.20753	0.145415	8.30399	1.00668e-16	3.31037e-16
ENSG00000008394	MGST1	10383	-3.76917	0.0743968	-50.663	0	0
ENSG00000008405	CRY1	1220.16	1.07597	0.089026	12.086	1.25265e-33	6.5575e-33
ENSG00000008438	PGLYRP1	0.155688	0.661057	4.08047	0.162005	0.871302
ENSG00000008441	NFIX	638.768	0.877803	0.110274	7.96021	1.71742e-15	5.37976e-15
ENSG00000008513	ST3GAL1	584.057	-1.78323	0.175945	-10.1351	3.85848e-24	1.59273e-23
ENSG00000008516	MMP25	11.958	0.942319	0.650981	1.44754	0.147746	0.196083
ENSG00000008517	IL32	114.752	-2.88119	0.268343	-10.7369	6.82723e-27	3.04942e-26
ENSG00000008710	PKD1	1098.41	-0.0405233	0.135018	-0.300133	0.764076	0.807351
ENSG00000008735	MAPK8IP2	906.637	1.69203	0.0934501	18.1063	2.84274e-73	2.90423e-72
ENSG00000008838	MED24	4754.1	0.897045	0.0599787	14.9561	1.42162e-50	1.02964e-49
ENSG00000008853	RHOBTB2	1117.03	-1.85635	0.0897597	-20.6813	5.09953e-95	6.77128e-94
ENSG00000008869	HEATR5B	1260.47	0.480143	0.0921952	5.20789	1.91001e-07	4.21336e-07
ENSG00000008952	SEC62	4641.55	-0.458305	0.0620159	-7.39012	1.467e-13	4.28781e-13
ENSG00000008988	RPS20	16541.3	-1.05505	0.0673931	-15.6552	3.06122e-55	2.38762e-54
ENSG00000009307	CSDE1	24309.2	1.14796	0.0484413	23.6981	3.77609e-124	6.75294e-123
ENSG00000009335	UBE3C	7436.82	0.213951	0.0549678	3.8923	9.92984e-05	0.000186472
ENSG00000009413	REV3L	1324.53	0.481757	0.0979421	4.9188	8.70769e-07	1.85347e-06
ENSG00000009694	TENM1	724.381	10.9351	1.02434	10.6753	1.3289e-26	5.87203e-26
ENSG00000009709	PAX7	48.7485	-0.875082	0.436543	-2.00457	0.0450088	0.0652938
ENSG00000009724	MASP2	0.503708	-1.13021	3.2956	-0.342944	0.731641
ENSG00000009765	IYD	5.82867	0.277658	0.916471	0.302965	0.761917	0.805528
ENSG00000009780	FAM76A	442.906	1.07604	0.113561	9.47547	2.65556e-21	1.01243e-20
ENSG00000009790	TRAF3IP3	0.463994	2.18041	3.98265	0.547479	0.58405
ENSG00000009830	POMT2	1574.96	-0.479046	0.0847908	-5.64974	1.60687e-08	3.7605e-08
ENSG00000009844	VTA1	2840.25	0.440042	0.0555868	7.9163	2.44679e-15	7.62589e-15
ENSG00000009950	MLXIPL	107.806	1.71505	0.24304	7.05666	1.70547e-12	4.7801e-12
ENSG00000009954	BAZ1B	8423.89	0.170244	0.0581338	2.92849	0.00340609	0.00561322
ENSG00000010017	RANBP9	1863.61	1.30741	0.0670601	19.4961	1.18584e-84	1.40209e-83
ENSG00000010030	ETV7	4.82307	-2.02697	1.06909	-1.89598	0.0579627	0.0825758
ENSG00000010072	SPRTN	1450.54	1.46429	0.0913542	16.0287	8.05434e-58	6.57198e-57
ENSG00000010165	EEF1AKNMT	3395.15	-0.306644	0.0760145	-4.03402	5.48308e-05	0.000104725
ENSG00000010219	DYRK4	564.736	-0.126858	0.11286	-1.12402	0.261003	0.326592
ENSG00000010244	ZNF207	8495.74	0.0524348	0.0467831	1.12081	0.26237	0.328127
ENSG00000010256	UQCRC1	7203.04	0.580043	0.065389	8.87065	7.27184e-19	2.56435e-18
ENSG00000010270	STARD3NL	1820.81	-0.464341	0.0629991	-7.37061	1.69853e-13	4.95361e-13
ENSG00000010278	CD9	2876.83	-2.24885	0.0826723	-27.202	6.15641e-163	1.54018e-161
ENSG00000010282	HHATL	0.147426	0.661057	4.08047	0.162005	0.871302
ENSG00000010292	NCAPD2	8813.48	-0.137725	0.0557187	-2.47179	0.0134437	0.0208956
ENSG00000010295	IFFO1	353.321	4.1724	0.194298	21.4743	2.70986e-102	3.90552e-101
ENSG00000010310	GIPR	19.903	0.978934	0.585089	1.67314	0.0943002	0.129772
ENSG00000010318	PHF7	101.765	1.13352	0.232827	4.86852	1.12435e-06	2.37984e-06
ENSG00000010319	SEMA3G	95.7149	3.78294	0.353048	10.7151	8.64902e-27	3.84924e-26
ENSG00000010322	NISCH	1974.17	1.9254	0.0657324	29.2915	1.33153e-188	4.05864e-187
ENSG00000010327	STAB1	4.88693	-2.0662	1.8095	-1.14186	0.25351	0.318354
ENSG00000010361	FUZ	649.957	1.29456	0.105844	12.2309	2.12565e-34	1.13386e-33
ENSG00000010379	SLC6A13	10.8681	2.09907	0.855033	2.45495	0.0140903	0.0218548
ENSG00000010404	IDS	7093.16	-2.22699	0.0628662	-35.4243	7.21769e-275	3.39195e-273
ENSG00000010438	PRSS3	47.222	-9.15077	1.23832	-7.38964	1.47227e-13	4.30254e-13
ENSG00000010539	ZNF200	556.441	0.961562	0.112692	8.53269	1.42987e-17	4.83032e-17
ENSG00000010610	CD4	0.870985	-0.9789	2.21659	-0.441624	0.658761	0.717354
ENSG00000010626	LRRC23	370.385	-2.83153	0.152696	-18.5435	9.20016e-77	9.85474e-76
ENSG00000010671	BTK	6.65162	3.45097	1.15567	2.98612	0.00282546	0.00469594
ENSG00000010704	HFE	851.26	-5.77241	0.199633	-28.9152	7.69623e-184	2.25339e-182
ENSG00000010803	SCMH1	1061.35	1.64362	0.14402	11.4125	3.62244e-30	1.75938e-29
ENSG00000010810	FYN	1840.8	5.10391	0.12539	40.7044	0	0
ENSG00000010818	HIVEP2	663.837	0.957234	0.131595	7.27412	3.48692e-13	1.00493e-12
ENSG00000010932	FMO1	0.303188	1.56868	4.03675	0.388599	0.697573
ENSG00000011007	ELOA	2196.04	0.302292	0.0576473	5.24381	1.57292e-07	3.488e-07
ENSG00000011009	LYPLA2	1633.66	-0.321199	0.087254	-3.68119	0.000232146	0.000424398
ENSG00000011021	CLCN6	462.168	-0.343612	0.120257	-2.85731	0.00427253	0.00696994
ENSG00000011028	MRC2	1890.06	-1.94018	0.103765	-18.6979	5.14524e-78	5.6183e-77
ENSG00000011052	NME1-NME2	287.819	1.0076	0.174069	5.78852	7.10113e-09	1.68954e-08
ENSG00000011083	SLC6A7	0
ENSG00000011105	TSPAN9	907.2	-0.0633916	0.111534	-0.56836	0.56979	0.635638
ENSG00000011114	BTBD7	434.405	0.48613	0.149705	3.24725	0.00116526	0.00200415
ENSG00000011132	APBA3	285.573	0.771777	0.157789	4.8912	1.00223e-06	2.12621e-06
ENSG00000011143	MKS1	795.469	1.16562	0.089114	13.0801	4.27997e-39	2.5254e-38
ENSG00000011198	ABHD5	839.447	0.315574	0.0938917	3.36104	0.000776503	0.00135676
ENSG00000011201	ANOS1	2.80119	-1.46708	1.57471	-0.931653	0.351516	0.422151
ENSG00000011243	AKAP8L	1808.33	0.76682	0.0648135	11.8312	2.69325e-32	1.3671e-31
ENSG00000011258	MBTD1	611.838	0.845799	0.136557	6.19373	5.87575e-10	1.47136e-09
ENSG00000011260	UTP18	3033.63	-0.360361	0.05825	-6.18646	6.15312e-10	1.53957e-09
ENSG00000011275	RNF216	2934.96	0.0523864	0.0560474	0.934681	0.349953	0.420682
ENSG00000011295	TTC19	1649.29	0.145617	0.0739008	1.97044	0.0487881	0.0702874
ENSG00000011304	PTBP1	15781.2	0.798082	0.062724	12.7237	4.3665e-37	2.4712e-36
ENSG00000011332	DPF1	215.38	1.36172	0.183907	7.4044	1.31748e-13	3.85748e-13
ENSG00000011347	SYT7	179.332	1.86843	0.263918	7.07959	1.44583e-12	4.0659e-12
ENSG00000011376	LARS2	3437.21	1.70782	0.0577837	29.5554	5.60273e-192	1.73628e-190
ENSG00000011405	PIK3C2A	3236.1	0.298379	0.138686	2.15147	0.0314395	0.0466404
ENSG00000011422	PLAUR	845.438	-3.08802	0.118203	-26.1247	1.91161e-150	4.31168e-149
ENSG00000011426	ANLN	6245.31	-0.540448	0.0782921	-6.90297	5.09255e-12	1.39614e-11
ENSG00000011451	WIZ	2502.74	0.921001	0.0714302	12.8937	4.88283e-38	2.81403e-37
ENSG00000011454	RABGAP1	1911.9	-0.146002	0.0671619	-2.17388	0.0297144	0.0442043
ENSG00000011465	DCN	0.511568	0.354682	3.91041	0.0907019	0.927729
ENSG00000011478	QPCTL	458.2	-0.102498	0.141864	-0.722509	0.469982	0.540906
ENSG00000011485	PPP5C	4706.82	0.467621	0.0464033	10.0773	6.96081e-24	2.8524e-23
ENSG00000011523	CEP68	968.412	-0.137277	0.0887014	-1.54763	0.121711	0.164278
ENSG00000011566	MAP4K3	1463.4	-0.676736	0.0658273	-10.2805	8.63058e-25	3.63369e-24
ENSG00000011590	ZBTB32	0.31313	-0.271321	4.08047	-0.0664926	0.946986
ENSG00000011600	TYROBP	0
ENSG00000011638	TMEM159	384.669	-1.52833	0.140994	-10.8397	2.23192e-27	1.01002e-26
ENSG00000011677	GABRA3	176.757	4.38705	0.273939	16.0147	1.0089e-57	8.2141e-57
ENSG00000012048	BRCA1	3193.94	0.0646164	0.0986444	0.655044	0.512439	0.581629
ENSG00000012061	ERCC1	2305.56	-1.57837	0.0989235	-15.9555	2.60871e-57	2.10729e-56
ENSG00000012124	CD22	32.8451	-2.91645	0.543895	-5.36215	8.22353e-08	1.85732e-07
ENSG00000012171	SEMA3B	142.942	-3.41862	0.252311	-13.5492	8.00812e-42	4.98173e-41
ENSG00000012174	MBTPS2	2520.74	-0.981231	0.076958	-12.7502	3.10914e-37	1.76498e-36
ENSG00000012211	PRICKLE3	567.921	-0.703713	0.104998	-6.70218	2.05338e-11	5.48208e-11
ENSG00000012223	LTF	0
ENSG00000012232	EXTL3	2658.59	0.314562	0.083816	3.75301	0.000174726	0.000322345
ENSG00000012504	NR1H4	16.6544	-6.87334	1.32246	-5.1974	2.02098e-07	4.45076e-07
ENSG00000012660	ELOVL5	5834.7	-0.577356	0.0497936	-11.595	4.36966e-31	2.16362e-30
ENSG00000012779	ALOX5	0
ENSG00000012817	KDM5D	403.9	-12.2515	1.18886	-10.3053	6.66633e-25	2.8118e-24
ENSG00000012822	CALCOCO1	753.83	-0.506291	0.110884	-4.56594	4.97265e-06	1.01303e-05
ENSG00000012963	UBR7	2544.67	0.574957	0.065128	8.82811	1.06461e-18	3.7317e-18
ENSG00000012983	MAP4K5	1958.69	0.170782	0.0736019	2.32035	0.0203218	0.0308499
ENSG00000013016	EHD3	1004.53	-1.38599	0.0788995	-17.5665	4.44718e-69	4.33349e-68
ENSG00000013275	PSMC4	9072.26	-1.73294	0.0553123	-31.3301	1.81709e-215	6.56239e-214
ENSG00000013288	MAN2B2	1159.51	-0.705975	0.0760575	-9.28212	1.66147e-20	6.19813e-20
ENSG00000013293	SLC7A14	12.1046	-0.499691	1.40086	-0.356702	0.721315	0.770457
ENSG00000013297	CLDN11	3.67559	-0.171591	1.19651	-0.14341	0.885967	0.910834
ENSG00000013306	SLC25A39	6240.52	-0.17011	0.0702889	-2.42015	0.015514	0.0239251
ENSG00000013364	MVP	4913.2	-7.47812	0.125708	-59.488	0	0
ENSG00000013374	NUB1	4076.47	1.22513	0.0742081	16.5094	3.14203e-61	2.71282e-60
ENSG00000013375	PGM3	1779.48	0.468265	0.0760776	6.1551	7.50296e-10	1.86925e-09
ENSG00000013392	RWDD2A	175.409	0.448239	0.174874	2.56321	0.0103708	0.0163064
ENSG00000013441	CLK1	868.469	0.445713	0.0961679	4.63474	3.57393e-06	7.35019e-06
ENSG00000013503	POLR3B	1207.98	1.67812	0.0784206	21.399	1.36518e-101	1.94937e-100
ENSG00000013523	ANGEL1	1386.85	0.764633	0.0758926	10.0752	7.1114e-24	2.91346e-23
ENSG00000013561	RNF14	2225.83	-0.338914	0.057225	-5.92247	3.17136e-09	7.67335e-09
ENSG00000013563	DNASE1L1	1060.92	-0.449836	0.077209	-5.82622	5.66982e-09	1.35386e-08
ENSG00000013573	DDX11	2603.38	0.747054	0.0599171	12.4681	1.11419e-35	6.11012e-35
ENSG00000013583	HEBP1	1056.08	-0.760365	0.0990504	-7.67655	1.63434e-14	4.96535e-14
ENSG00000013588	GPRC5A	20438.9	-7.45117	0.0710788	-104.83	0	0
ENSG00000013619	MAMLD1	345.125	-0.300629	0.122853	-2.44706	0.0144026	0.0223074
ENSG00000013725	CD6	1.60764	-4.19717	2.66889	-1.57263	0.115805	0.156854
ENSG00000013810	TACC3	5116.45	0.45565	0.0624701	7.29389	3.01142e-13	8.70053e-13
ENSG00000014123	UFL1	1020.06	0.771519	0.0904005	8.53445	1.40821e-17	4.75802e-17
ENSG00000014138	POLA2	2485.44	1.20853	0.0705723	17.1247	9.7079e-66	9.03297e-65
ENSG00000014164	ZC3H3	911.712	-0.899308	0.1077	-8.35009	6.82088e-17	2.25576e-16
ENSG00000014216	CAPN1	6030.92	-1.29088	0.048667	-26.5248	5.0206e-155	1.16935e-153
ENSG00000014257	ACP3	12.6048	3.09065	0.919268	3.36208	0.000773579	0.00135178
ENSG00000014641	MDH1	7744.67	-0.692993	0.0655578	-10.5707	4.07321e-26	1.77532e-25
ENSG00000014824	SLC30A9	2677.01	0.496046	0.0769926	6.44278	1.17308e-10	3.03117e-10
ENSG00000014914	MTMR11	207.935	-3.25678	0.210847	-15.4462	8.00739e-54	6.10687e-53
ENSG00000014919	COX15	2929.71	-0.740977	0.0554113	-13.3723	8.77669e-41	5.35223e-40
ENSG00000015133	CCDC88C	588.245	-0.266393	0.109297	-2.43733	0.0147963	0.0228753
ENSG00000015153	YAF2	593.941	-0.857418	0.122381	-7.00614	2.44985e-12	6.81603e-12
ENSG00000015171	ZMYND11	2444.08	-1.6578	0.07399	-22.4057	3.46192e-111	5.4739e-110
ENSG00000015285	WAS	12.4734	-0.307188	0.694224	-0.442491	0.658134	0.716873
ENSG00000015413	DPEP1	22.8675	0.096949	0.468418	0.206971	0.836032	0.86906
ENSG00000015475	BID	1281.11	-0.89687	0.123065	-7.2878	3.15056e-13	9.09719e-13
ENSG00000015479	MATR3	16030.7	0.734829	0.0521124	14.1009	3.75191e-45	2.4715e-44
ENSG00000015520	NPC1L1	8.82787	2.66013	0.899902	2.95602	0.00311637	0.00515406
ENSG00000015532	XYLT2	1410.66	-1.37038	0.0835784	-16.3963	2.03139e-60	1.7258e-59
ENSG00000015568	RGPD5	46.9267	2.8432	0.526909	5.39599	6.81463e-08	1.54627e-07
ENSG00000015592	STMN4	0.311376	1.60236	4.03378	0.397234	0.691195
ENSG00000015676	NUDCD3	3448.41	0.340927	0.0687226	4.96091	7.01631e-07	1.50258e-06
ENSG00000016082	ISL1	243.654	8.04282	0.66069	12.1734	4.31005e-34	2.28527e-33
ENSG00000016391	CHDH	759.213	1.23013	0.0943368	13.0397	7.27097e-39	4.26853e-38
ENSG00000016402	IL20RA	1.68688	-4.3441	2.12082	-2.04831	0.0405295	0.0592495
ENSG00000016490	CLCA1	0
ENSG00000016602	CLCA4	0
ENSG00000016864	GLT8D1	1216.11	0.660293	0.0951603	6.93874	3.95609e-12	1.08941e-11
ENSG00000017260	ATP2C1	2883.55	-0.730986	0.0711831	-10.2691	9.71083e-25	4.08202e-24
ENSG00000017427	IGF1	9.02719	0.943635	0.852005	1.10755	0.268058	0.334294
ENSG00000017483	SLC38A5	2.92344	0.228463	1.53664	0.148677	0.881809	0.907625
ENSG00000017797	RALBP1	2922.98	-0.216371	0.0593581	-3.64518	0.0002672	0.000486088
ENSG00000018189	RUFY3	638.578	1.91452	0.106007	18.0603	6.54774e-73	6.63822e-72
ENSG00000018236	CNTN1	5939.33	-4.03819	0.0987988	-40.8728	0	0
ENSG00000018280	SLC11A1	19.391	-1.32149	0.614436	-2.15074	0.0314965	0.0467212
ENSG00000018408	WWTR1	4399.41	-3.87946	0.0672067	-57.7243	0	0
ENSG00000018510	AGPS	4012.11	0.0852333	0.0701894	1.21433	0.224621	0.286396
ENSG00000018607	ZNF806	0.147426	0.661057	4.08047	0.162005	0.871302
ENSG00000018610	CXorf56	2149.63	1.27239	0.0658055	19.3357	2.6905e-83	3.12149e-82
ENSG00000018625	ATP1A2	3.3523	-1.81376	1.27409	-1.42358	0.154569	0.204349
ENSG00000018699	TTC27	1447.56	-0.341575	0.066868	-5.1082	3.25239e-07	7.08449e-07
ENSG00000018869	ZNF582	81.9774	0.624473	0.268962	2.32179	0.0202442	0.0307422
ENSG00000019102	VSIG2	0.147426	0.661057	4.08047	0.162005	0.871302
ENSG00000019144	PHLDB1	704.005	0.817237	0.126557	6.45747	1.06471e-10	2.75612e-10
ENSG00000019169	MARCO	0.608829	-2.8609	3.59519	-0.795759	0.426172	0.497456
ENSG00000019186	CYP24A1	9122.16	-13.1446	0.591582	-22.2193	2.23356e-109	3.46379e-108
ENSG00000019485	PRDM11	467.505	-0.88769	0.154168	-5.75794	8.51461e-09	2.0186e-08
ENSG00000019505	SYT13	660.899	-3.3818	0.119765	-28.237	2.05591e-175	5.76494e-174
ENSG00000019549	SNAI2	447.788	5.08457	0.207071	24.5547	3.8524e-133	7.42597e-132
ENSG00000019582	CD74	1.12007	1.93443	2.60075	0.743798	0.456999	0.528256
ENSG00000019991	HGF	4.74021	2.02493	1.27274	1.591	0.111608	0.151491
ENSG00000019995	ZRANB1	1514.36	0.326795	0.0660574	4.94714	7.53129e-07	1.60971e-06
ENSG00000020129	NCDN	1759.73	0.81689	0.0740699	11.0286	2.78053e-28	1.29102e-27
ENSG00000020181	ADGRA2	342.005	1.71667	0.145884	11.7674	5.74654e-32	2.89794e-31
ENSG00000020219	CCT8L1P	0.16613	-1.2625	4.08047	-0.309399	0.757018
ENSG00000020256	ZFP64	1407.19	0.796888	0.0745251	10.6929	1.09914e-26	4.87537e-26
ENSG00000020426	MNAT1	1101.88	0.439777	0.0764561	5.75202	8.81822e-09	2.08845e-08
ENSG00000020577	SAMD4A	478.223	-1.20739	0.163057	-7.40473	1.31417e-13	3.84838e-13
ENSG00000020633	RUNX3	222.778	-7.55534	0.543889	-13.8913	7.15059e-44	4.6105e-43
ENSG00000020922	MRE11	1871.58	1.05933	0.0749195	14.1395	2.16675e-45	1.43341e-44
ENSG00000021300	PLEKHB1	157.627	2.90546	0.235051	12.361	4.24936e-35	2.30107e-34
ENSG00000021355	SERPINB1	1465.21	-2.76666	0.103767	-26.6622	1.2912e-156	3.0417e-155
ENSG00000021461	CYP3A43	0.329539	-0.315089	4.08047	-0.0772187	0.93845
ENSG00000021488	SLC7A9	2.77724	-1.48737	1.55046	-0.959312	0.337401	0.407627
ENSG00000021574	SPAST	1573.98	-0.197462	0.100084	-1.97297	0.048499	0.0698981
ENSG00000021645	NRXN3	467.62	5.39603	0.239627	22.5184	2.73886e-112	4.37912e-111
ENSG00000021762	OSBPL5	308.855	-1.08142	0.144403	-7.48894	6.94332e-14	2.05368e-13
ENSG00000021776	AQR	3271.71	-1.14289	0.0695456	-16.4337	1.09784e-60	9.36114e-60
ENSG00000021826	CPS1	1442.86	0.33029	0.0693903	4.75988	1.93705e-06	4.05108e-06
ENSG00000021852	C8B	0
ENSG00000022267	FHL1	7321.83	2.99619	0.073863	40.5641	0	0
ENSG00000022277	RTF2	3267.35	-0.206021	0.0559809	-3.6802	0.000233053	0.000426014
ENSG00000022355	GABRA1	0
ENSG00000022556	NLRP2	1705.93	-14.3298	1.18087	-12.135	6.89202e-34	3.6325e-33
ENSG00000022567	SLC45A4	706.249	-1.88883	0.1424	-13.2642	3.73144e-40	2.24601e-39
ENSG00000022840	RNF10	5831.24	-0.169722	0.0881939	-1.92442	0.0543025	0.0777131
ENSG00000022976	ZNF839	425.271	0.37479	0.125749	2.98047	0.0028781	0.00477702
ENSG00000023041	ZDHHC6	1792.39	0.0700944	0.0621708	1.12745	0.259553	0.324931
ENSG00000023171	GRAMD1B	2487.58	-4.06168	0.106942	-37.9803	0	0
ENSG00000023191	RNH1	4877.5	-1.48884	0.0794448	-18.7406	2.31106e-78	2.53099e-77
ENSG00000023228	NDUFS1	4821.79	-0.10135	0.0471447	-2.14975	0.0315747	0.0468336
ENSG00000023287	RB1CC1	2761.04	0.123665	0.0681338	1.81503	0.069519	0.0977637
ENSG00000023318	ERP44	2128.31	0.0176426	0.0681974	0.2587	0.795867	0.835009
ENSG00000023330	ALAS1	3072.94	-0.65665	0.0681386	-9.63698	5.58081e-22	2.17366e-21
ENSG00000023445	BIRC3	1383.38	-7.03391	0.185773	-37.863	0	0
ENSG00000023516	AKAP11	2347.36	0.128755	0.110362	1.16666	0.243346	0.307149
ENSG00000023572	GLRX2	870.611	-1.39925	0.110807	-12.6278	1.4838e-36	8.29132e-36
ENSG00000023608	SNAPC1	750.373	-0.63193	0.0954634	-6.6196	3.60161e-11	9.51156e-11
ENSG00000023697	DERA	1072.92	-1.85343	0.0778128	-23.8191	2.11839e-125	3.81783e-124
ENSG00000023734	STRAP	9782.29	-0.441818	0.0418299	-10.5623	4.45808e-26	1.93988e-25
ENSG00000023839	ABCC2	9088.01	-8.90128	0.148058	-60.1202	0	0
ENSG00000023892	DEF6	109.077	6.63122	0.626025	10.5926	3.22587e-26	1.41098e-25
ENSG00000023902	PLEKHO1	537.74	2.1763	0.124874	17.428	5.05502e-68	4.84943e-67
ENSG00000023909	GCLM	5488.76	-2.5445	0.081348	-31.2792	8.95311e-215	3.21463e-213
ENSG00000024048	UBR2	1299.65	0.416081	0.106828	3.89485	9.82578e-05	0.000184611
ENSG00000024422	EHD2	4243.57	-5.68967	0.0998305	-56.9933	0	0
ENSG00000024526	DEPDC1	3442.74	1.79442	0.102948	17.4303	4.8573e-68	4.66216e-67
ENSG00000024862	CCDC28A	505.58	0.635305	0.106309	5.97602	2.28652e-09	5.56724e-09
ENSG00000025039	RRAGD	760.51	0.327597	0.112391	2.91481	0.00355907	0.00585286
ENSG00000025156	HSF2	1481.4	2.34343	0.0821515	28.5258	5.61366e-179	1.59581e-177
ENSG00000025293	PHF20	1872.25	-0.0604542	0.0595465	-1.01524	0.30999	0.378985
ENSG00000025423	HSD17B6	88.7852	2.54621	0.292964	8.69122	3.58575e-18	1.23548e-17
ENSG00000025434	NR1H3	266.055	-1.435	0.179898	-7.97674	1.5025e-15	4.71448e-15
ENSG00000025708	TYMP	213.294	-5.98717	0.36806	-16.2668	1.69743e-59	1.4187e-58
ENSG00000025770	NCAPH2	2569.26	1.45577	0.0749119	19.4331	4.05384e-84	4.76275e-83
ENSG00000025772	TOMM34	2170.48	0.360542	0.0779083	4.62778	3.69614e-06	7.5948e-06
ENSG00000025796	SEC63	4116.09	1.01348	0.0814689	12.4401	1.58341e-35	8.6424e-35
ENSG00000025800	KPNA6	3717.06	0.170167	0.0687229	2.47613	0.0132815	0.0206486
ENSG00000026025	VIM	29340.9	-1.20476	0.0689034	-17.4847	1.87337e-68	1.81311e-67
ENSG00000026036	RTEL1-TNFRSF6B	69.5536	0.772974	0.322914	2.39375	0.0166773	0.0256254
ENSG00000026103	FAS	665.231	-1.85693	0.100074	-18.5556	7.34775e-77	7.8933e-76
ENSG00000026297	RNASET2	460.833	0.371201	0.108755	3.41318	0.000642095	0.00113107
ENSG00000026508	CD44	9708.91	-9.60758	0.196767	-48.8271	0	0
ENSG00000026559	KCNG1	238.452	-0.0579682	0.174938	-0.331364	0.74037	0.7866
ENSG00000026652	AGPAT4	583.31	2.45774	0.13336	18.4294	7.63637e-76	8.0542e-75
ENSG00000026751	SLAMF7	22.1834	-5.18545	0.962222	-5.38904	7.08339e-08	1.60568e-07
ENSG00000026950	BTN3A1	415.9	-1.1172	0.120109	-9.30152	1.38451e-20	5.17429e-20
ENSG00000027001	MIPEP	896.139	-0.0376777	0.102082	-0.369092	0.712059	0.762457
ENSG00000027075	PRKCH	431.768	-1.17977	0.146565	-8.04948	8.31468e-16	2.63523e-15
ENSG00000027644	INSRR	0.442278	2.11779	3.99605	0.52997	0.596133
ENSG00000027697	IFNGR1	1588.75	0.576576	0.0794532	7.2568	3.96343e-13	1.14014e-12
ENSG00000027847	B4GALT7	756.737	0.0901325	0.0882155	1.02173	0.306909	0.375776
ENSG00000027869	SH2D2A	89.0526	1.50471	0.325276	4.62594	3.72912e-06	7.66088e-06
ENSG00000028116	VRK2	796.197	-0.502909	0.0859891	-5.84852	4.95971e-09	1.18842e-08
ENSG00000028137	TNFRSF1B	21.8854	-0.536451	0.613239	-0.874783	0.381692	0.453462
ENSG00000028203	VEZT	3402.95	-0.924092	0.0643992	-14.3494	1.07427e-46	7.30998e-46
ENSG00000028277	POU2F2	27.2836	1.27769	0.677118	1.88696	0.0591664	0.0841298
ENSG00000028310	BRD9	884.582	0.838062	0.0904873	9.26165	2.01295e-20	7.47927e-20
ENSG00000028528	SNX1	3079.24	-0.692351	0.103487	-6.6902	2.22865e-11	5.94062e-11
ENSG00000028839	TBPL1	845.43	0.150584	0.0873774	1.72338	0.0848203	0.117677
ENSG00000029153	ARNTL2	1409.28	-1.19834	0.0870244	-13.7702	3.85142e-43	2.45768e-42
ENSG00000029363	BCLAF1	11097.3	1.36875	0.0615332	22.2441	1.28748e-109	2.00331e-108
ENSG00000029364	SLC39A9	3362.83	-0.990829	0.0535324	-18.509	1.74829e-76	1.86086e-75
ENSG00000029534	ANK1	380.284	-1.86411	0.14131	-13.1916	9.8083e-40	5.86382e-39
ENSG00000029559	IBSP	0
ENSG00000029639	TFB1M	454.946	0.755122	0.179122	4.21569	2.49019e-05	4.85714e-05
ENSG00000029725	RABEP1	4383.31	0.214263	0.076018	2.81858	0.00482359	0.00782832
ENSG00000029993	HMGB3	7963.51	1.11299	0.051795	21.4883	2.00135e-102	2.89563e-101
ENSG00000030066	NUP160	4425.21	0.519963	0.0711694	7.306	2.75215e-13	7.96386e-13
ENSG00000030110	BAK1	1652.15	1.11779	0.0738727	15.1313	1.00648e-51	7.43468e-51
ENSG00000030304	MUSK	0.16613	-1.2625	4.08047	-0.309399	0.757018
ENSG00000030419	IKZF2	68.7657	1.44539	0.378206	3.82171	0.000132532	0.000246834
ENSG00000030582	GRN	8281.45	-1.52211	0.0760024	-20.0272	3.19407e-89	3.9713e-88
ENSG00000031003	FAM13B	1418.73	0.662543	0.109271	6.06329	1.33361e-09	3.28414e-09
ENSG00000031081	ARHGAP31	136.986	0.654336	0.265313	2.46628	0.0136526	0.0212096
ENSG00000031691	CENPQ	488.357	0.199301	0.107094	1.86099	0.0627463	0.0888248
ENSG00000031698	SARS1	6103.7	0.777761	0.0490259	15.8643	1.11989e-56	8.96442e-56
ENSG00000031823	RANBP3	2537.69	0.743814	0.0853898	8.7108	3.01744e-18	1.04171e-17
ENSG00000032219	ARID4A	686.999	0.534437	0.105944	5.04452	4.5465e-07	9.83529e-07
ENSG00000032389	EIPR1	1322.33	-1.34976	0.0870326	-15.5087	3.03174e-54	2.3352e-53
ENSG00000032444	PNPLA6	1843.8	-1.45474	0.0803963	-18.0947	3.51139e-73	3.57946e-72
ENSG00000032742	IFT88	427.982	-1.20854	0.138025	-8.75595	2.02386e-18	7.038e-18
ENSG00000033011	ALG1	1683.34	-0.797492	0.0764926	-10.4257	1.89178e-25	8.09895e-25
ENSG00000033030	ZCCHC8	1482.01	0.354091	0.068025	5.20531	1.93674e-07	4.2693e-07
ENSG00000033050	ABCF2	5270.89	0.621182	0.0917932	6.76718	1.31314e-11	3.53528e-11
ENSG00000033100	CHPF2	1966	-0.0284421	0.0713597	-0.398574	0.690207	0.745032
ENSG00000033122	LRRC7	13.8912	0.872951	0.620111	1.40773	0.15921	0.209947
ENSG00000033170	FUT8	1151.78	-0.174544	0.0982677	-1.77621	0.0756977	0.10583
ENSG00000033178	UBA6	2721.84	0.812445	0.111198	7.30628	2.74631e-13	7.94943e-13
ENSG00000033327	GAB2	328.247	-1.26888	0.134619	-9.4257	4.27255e-21	1.62125e-20
ENSG00000033627	ATP6V0A1	2915.69	-0.15706	0.0778892	-2.01645	0.0437527	0.0636207
ENSG00000033800	PIAS1	2075.51	0.239946	0.10777	2.22647	0.025983	0.0388844
ENSG00000033867	SLC4A7	1997.22	-1.24405	0.095549	-13.02	9.41325e-39	5.5053e-38
ENSG00000034053	APBA2	278.733	-0.654677	0.194429	-3.36719	0.000759393	0.00132812
ENSG00000034152	MAP2K3	2311.98	-1.19602	0.0619282	-19.313	4.17909e-83	4.84247e-82
ENSG00000034239	EFCAB1	1.36455	-1.82464	2.5622	-0.712137	0.47638	0.546305
ENSG00000034510	TMSB10	36551	-3.02393	0.0747977	-40.4281	0	0
ENSG00000034533	ASTE1	250.386	0.315973	0.157954	2.00041	0.0454557	0.0658759
ENSG00000034677	RNF19A	1084.47	-1.41958	0.129325	-10.9769	4.93642e-28	2.27212e-27
ENSG00000034693	PEX3	715.222	1.43528	0.0981675	14.6207	2.07215e-48	1.44879e-47
ENSG00000034713	GABARAPL2	2133.48	0.200189	0.0646198	3.09796	0.00194861	0.00329106
ENSG00000034971	MYOC	0
ENSG00000035115	SH3YL1	177.254	-0.752665	0.248554	-3.02818	0.00246033	0.00411563
ENSG00000035141	FAM136A	4489	-0.170191	0.0473056	-3.59769	0.000321055	0.000581156
ENSG00000035403	VCL	10153.7	-0.689447	0.0573051	-12.0312	2.43659e-33	1.26696e-32
ENSG00000035499	DEPDC1B	1111.24	0.16214	0.0736503	2.20149	0.0277014	0.0413361
ENSG00000035664	DAPK2	103.471	-2.12999	0.331178	-6.43157	1.26291e-10	3.26102e-10
ENSG00000035681	NSMAF	1457.46	-1.6192	0.078285	-20.6834	4.88428e-95	6.49012e-94
ENSG00000035687	ADSS2	3343.72	0.0734137	0.0565762	1.29761	0.194422	0.251309
ENSG00000035720	STAP1	1.26273	3.62004	2.41131	1.50127	0.133285	0.178421
ENSG00000035862	TIMP2	8539.7	-3.70623	0.056276	-65.8581	0	0
ENSG00000035928	RFC1	2944.64	0.67345	0.0770158	8.74431	2.2439e-18	7.78136e-18
ENSG00000036054	TBC1D23	1157.7	0.0625299	0.0912518	0.685246	0.493189	0.563111
ENSG00000036257	CUL3	3926.22	-0.120545	0.0515373	-2.33899	0.0193362	0.0294477
ENSG00000036448	MYOM2	79.7846	-0.125031	0.287432	-0.434994	0.663567	0.721393
ENSG00000036473	OTC	0.147426	0.661057	4.08047	0.162005	0.871302
ENSG00000036530	CYP46A1	11.2539	1.69441	0.795485	2.13003	0.0331689	0.0490571
ENSG00000036549	AC118549.1	2329.45	1.27782	0.0651818	19.604	1.4304e-85	1.70645e-84
ENSG00000036565	SLC18A1	2.4515	2.46812	1.6164	1.52692	0.12678	0.170513
ENSG00000036672	USP2	213.997	3.14974	0.321555	9.79533	1.17915e-22	4.67405e-22
ENSG00000036828	CASR	39.8409	0.352717	0.344241	1.02462	0.305542	0.374301
ENSG00000037042	TUBG2	293.716	-0.8228	0.142484	-5.77467	7.71044e-09	1.8317e-08
ENSG00000037241	RPL26L1	1919.61	0.418097	0.0787609	5.30843	1.10573e-07	2.47626e-07
ENSG00000037280	FLT4	1132.27	3.41135	0.12637	26.995	1.68991e-160	4.13851e-159
ENSG00000037474	NSUN2	5552.27	0.174121	0.0452971	3.84398	0.000121055	0.000226049
ENSG00000037637	FBXO42	752.082	0.25837	0.0953171	2.71063	0.00671549	0.0107558
ENSG00000037749	MFAP3	1032.85	0.332787	0.111552	2.98323	0.00285222	0.00473703
ENSG00000037757	MRI1	1195.26	1.39922	0.0817121	17.1238	9.85921e-66	9.16917e-65
ENSG00000037897	METTL1	900.002	-0.424045	0.0896015	-4.73256	2.21703e-06	4.61945e-06
ENSG00000037965	HOXC8	160.047	-0.0755769	0.181711	-0.415918	0.67747	0.733634
ENSG00000038002	AGA	637.196	-0.321868	0.112476	-2.86166	0.00421433	0.00688407
ENSG00000038210	PI4K2B	896.378	0.814106	0.108024	7.53635	4.83292e-14	1.44049e-13
ENSG00000038219	BOD1L1	2198.51	-0.140208	0.0750178	-1.86899	0.0616235	0.087342
ENSG00000038274	MAT2B	2645.68	-0.163836	0.0533151	-3.07297	0.00211937	0.00356648
ENSG00000038295	TLL1	25.5685	1.59819	0.499366	3.20044	0.00137219	0.00234636
ENSG00000038358	EDC4	3841.95	1.00524	0.0685318	14.6682	1.03042e-48	7.23438e-48
ENSG00000038382	TRIO	3709.49	-1.11744	0.093278	-11.9796	4.54263e-33	2.34888e-32
ENSG00000038427	VCAN	2399.38	1.71229	0.117747	14.5421	6.55291e-48	4.54565e-47
ENSG00000038532	CLEC16A	1310.98	0.147229	0.0897571	1.64031	0.100941	0.138031
ENSG00000038945	MSR1	0.384415	0.183622	4.08047	0.0450001	0.964107
ENSG00000039068	CDH1	645.397	-2.09195	0.124144	-16.8511	1.03062e-63	9.22887e-63
ENSG00000039123	MTREX	4415.78	0.578328	0.075161	7.69453	1.42016e-14	4.32525e-14
ENSG00000039139	DNAH5	40.9441	-2.86678	0.515568	-5.56044	2.691e-08	6.22779e-08
ENSG00000039319	ZFYVE16	1983.07	-0.0784499	0.0856689	-0.915734	0.359807	0.430381
ENSG00000039523	RIPOR1	1431.2	-0.882967	0.0749383	-11.7826	4.8e-32	2.42587e-31
ENSG00000039537	C6	0.181566	-1.2625	4.08047	-0.309399	0.757018
ENSG00000039560	RAI14	4180.09	-0.90354	0.063787	-14.1649	1.50988e-45	1.00351e-44
ENSG00000039600	SOX30	2.68965	1.78229	1.534	1.16186	0.245293	0.309291
ENSG00000039650	PNKP	650.501	-0.124483	0.131015	-0.950142	0.34204	0.41264
ENSG00000039987	BEST2	0.934426	1.99841	2.70397	0.739065	0.459868	0.531009
ENSG00000040199	PHLPP2	1143.8	0.186634	0.0929565	2.00775	0.0446696	0.0648524
ENSG00000040275	SPDL1	3036.6	0.764686	0.0926777	8.25102	1.57044e-16	5.12698e-16
ENSG00000040341	STAU2	1667.66	-0.544884	0.101808	-5.3521	8.69374e-08	1.95971e-07
ENSG00000040487	SLC66A1	516.868	-0.740261	0.109704	-6.74783	1.50075e-11	4.03104e-11
ENSG00000040531	CTNS	996.036	-0.511885	0.0931512	-5.49521	3.90246e-08	8.96775e-08
ENSG00000040608	RTN4R	219.497	-0.271287	0.195062	-1.39077	0.164295	0.216099
ENSG00000040633	PHF23	2523.52	-0.346363	0.0620205	-5.58465	2.34167e-08	5.43507e-08
ENSG00000040731	CDH10	24.513	0.186812	0.466218	0.400696	0.688644	0.743753
ENSG00000040933	INPP4A	1547.79	0.533413	0.095844	5.56543	2.61508e-08	6.05509e-08
ENSG00000041353	RAB27B	2151.42	-6.20597	0.144383	-42.9826	0	0
ENSG00000041357	PSMA4	11167.6	0.312742	0.0554247	5.64266	1.67445e-08	3.91421e-08
ENSG00000041515	MYO16	3.43438	-4.48928	1.74704	-2.56965	0.0101801	0.0160241
ENSG00000041802	LSG1	1478.74	-1.22387	0.0800872	-15.2817	1.01253e-52	7.59728e-52
ENSG00000041880	PARP3	316.69	-0.40222	0.182795	-2.20039	0.0277792	0.0414456
ENSG00000041982	TNC	201.675	1.62858	0.230445	7.0671	1.58208e-12	4.4403e-12
ENSG00000041988	THAP3	379.736	-0.0375496	0.137864	-0.272366	0.78534	0.826011
ENSG00000042062	RIPOR3	7.96412	0.627234	0.848704	0.739048	0.459878	0.531009
ENSG00000042088	TDP1	995.964	0.861944	0.0978616	8.80778	1.27646e-18	4.46486e-18
ENSG00000042286	AIFM2	1499.22	-4.72018	0.10606	-44.5048	0	0
ENSG00000042304	C2orf83	1.45988	0.738123	2.08185	0.354552	0.722925	0.77191
ENSG00000042317	SPATA7	189.808	-0.216253	0.186056	-1.1623	0.245112	0.309111
ENSG00000042429	MED17	1195.83	0.407233	0.0739355	5.50795	3.63036e-08	8.35279e-08
ENSG00000042445	RETSAT	1888.55	-1.12523	0.0776395	-14.493	1.34181e-47	9.26982e-47
ENSG00000042493	CAPG	714.047	-4.37454	0.148498	-29.4585	9.79663e-191	3.02085e-189
ENSG00000042753	AP2S1	3915.01	-0.777474	0.0793182	-9.80196	1.10422e-22	4.38263e-22
ENSG00000042781	USH2A	5.19214	5.48586	1.9664	2.7898	0.00527411	0.00852742
ENSG00000042813	ZPBP	0
ENSG00000042832	TG	4.91889	-2.90955	1.41312	-2.05896	0.0394984	0.057856
ENSG00000042980	ADAM28	8.82211	-3.07972	1.249	-2.46575	0.0136727	0.0212391
ENSG00000043039	BARX2	469.511	8.28713	0.492832	16.8153	1.88526e-63	1.67686e-62
ENSG00000043093	DCUN1D1	1358.64	-0.64696	0.10927	-5.92072	3.20526e-09	7.75336e-09
ENSG00000043143	JADE2	1881.68	-3.87397	0.107024	-36.1972	6.73448e-287	3.3696e-285
ENSG00000043355	ZIC2	1459.16	3.00326	0.0856812	35.0516	3.69166e-269	1.68374e-267
ENSG00000043462	LCP2	0.155688	0.661057	4.08047	0.162005	0.871302
ENSG00000043514	TRIT1	578.788	-0.0131034	0.110588	-0.118489	0.905681	0.926304
ENSG00000043591	ADRB1	37.1318	-2.35877	0.471377	-5.004	5.61518e-07	1.20908e-06
ENSG00000044012	GUCA2B	2.00156	-4.5964	1.99024	-2.30947	0.0209175	0.031705
ENSG00000044090	CUL7	1127.98	0.525228	0.0722317	7.27143	3.557e-13	1.02481e-12
ENSG00000044115	CTNNA1	12122.2	-0.7609	0.0525387	-14.4826	1.5598e-47	1.07638e-46
ENSG00000044446	PHKA2	948.739	0.878069	0.0897904	9.77909	1.38453e-22	5.4788e-22
ENSG00000044459	CNTLN	837.511	0.478316	0.0945327	5.0598	4.19704e-07	9.09841e-07
ENSG00000044524	EPHA3	619.644	12.5676	1.18191	10.6333	2.08554e-26	9.18041e-26
ENSG00000044574	HSPA5	25801.2	-0.744545	0.042725	-17.4264	5.19888e-68	4.98486e-67
ENSG00000046604	DSG2	7728.74	0.439199	0.0592045	7.41833	1.18608e-13	3.48097e-13
ENSG00000046647	GEMIN8	291.296	0.138438	0.153932	0.899345	0.368469	0.439242
ENSG00000046651	OFD1	931.391	1.40592	0.0829022	16.9588	1.65636e-64	1.50902e-63
ENSG00000046653	GPM6B	437.232	9.67751	0.840775	11.5102	1.17164e-30	5.7522e-30
ENSG00000046774	MAGEC2	10.3966	3.28965	0.96966	3.39258	0.000692382	0.00121642
ENSG00000046889	PREX2	90.2866	8.20609	1.06023	7.73994	9.94605e-15	3.04567e-14
ENSG00000047056	WDR37	569.927	0.166776	0.126339	1.32007	0.186812	0.242435
ENSG00000047188	YTHDC2	2300.32	0.620949	0.0677366	9.16712	4.8583e-20	1.78301e-19
ENSG00000047230	CTPS2	1183.71	-0.00868164	0.0811273	-0.107013	0.914779	0.933537
ENSG00000047249	ATP6V1H	1517.82	-0.842858	0.0910163	-9.26052	2.03444e-20	7.55608e-20
ENSG00000047315	POLR2B	7469.2	0.625803	0.0535953	11.6764	1.68178e-31	8.41707e-31
ENSG00000047346	FAM214A	451.269	-1.17997	0.159459	-7.39981	1.36376e-13	3.99109e-13
ENSG00000047365	ARAP2	195.059	1.72633	0.234241	7.36987	1.708e-13	4.98046e-13
ENSG00000047410	TPR	7386.22	0.581624	0.0530405	10.9656	5.58998e-28	2.56785e-27
ENSG00000047457	CP	124.962	-7.93614	0.981887	-8.08254	6.34303e-16	2.02035e-15
ENSG00000047578	KIAA0556	730.799	-0.813508	0.122957	-6.61621	3.68527e-11	9.7242e-11
ENSG00000047579	DTNBP1	585.569	1.13114	0.108649	10.4109	2.21056e-25	9.44628e-25
ENSG00000047597	XK	150.546	-0.0377058	0.185726	-0.203018	0.839121	0.871613
ENSG00000047617	ANO2	1.05013	3.36295	3.00986	1.11731	0.263862	0.329781
ENSG00000047621	C12orf4	1083.39	0.51426	0.0798106	6.4435	1.16749e-10	3.01713e-10
ENSG00000047634	SCML1	2197.67	3.21786	0.0783284	41.0817	0	0
ENSG00000047644	WWC3	1378.21	-9.4829	0.38004	-24.9523	2.01369e-137	4.0808e-136
ENSG00000047648	ARHGAP6	0.16613	-1.2625	4.08047	-0.309399	0.757018
ENSG00000047662	FAM184B	27.7401	8.08644	1.25085	6.46475	1.01465e-10	2.62875e-10
ENSG00000047849	MAP4	11996.3	0.0551964	0.0434764	1.26957	0.204237	0.262843
ENSG00000047932	GOPC	2657.18	0.855424	0.0641459	13.3356	1.4369e-40	8.72529e-40
ENSG00000047936	ROS1	4.46306	-2.02416	1.15696	-1.74954	0.0801972	0.111622
ENSG00000048028	USP28	2258.04	1.21313	0.0825348	14.6984	6.60024e-49	4.64972e-48
ENSG00000048052	HDAC9	59.6366	0.725794	0.341991	2.12226	0.0338159	0.0499622
ENSG00000048140	TSPAN17	2217.24	-1.1189	0.0656527	-17.0427	3.95964e-65	3.64779e-64
ENSG00000048162	NOP16	1987.64	-0.675099	0.0720398	-9.3712	7.17137e-21	2.70408e-20
ENSG00000048342	CC2D2A	841.61	-0.377715	0.116463	-3.24321	0.00118191	0.00203165
ENSG00000048392	RRM2B	1819.35	-1.42505	0.0999965	-14.251	4.42165e-46	2.97712e-45
ENSG00000048405	ZNF800	526.571	0.0789858	0.116478	0.678117	0.497698	0.567422
ENSG00000048462	TNFRSF17	0.147548	0.661057	4.08047	0.162005	0.871302
ENSG00000048471	SNX29	523.499	0.484033	0.111327	4.34786	1.37471e-05	2.72868e-05
ENSG00000048540	LMO3	1.19611	3.551	2.87029	1.23716	0.216028	0.276656
ENSG00000048544	MRPS10	1769.46	-0.0127303	0.0651982	-0.195255	0.845193	0.876645
ENSG00000048545	GUCA1A	0
ENSG00000048649	RSF1	1903.91	0.357915	0.0897294	3.98882	6.6402e-05	0.000126125
ENSG00000048707	VPS13D	1196.32	-0.504061	0.118447	-4.25557	2.08513e-05	4.08898e-05
ENSG00000048740	CELF2	702.452	8.20306	0.426109	19.2511	1.38241e-82	1.5929e-81
ENSG00000048828	FAM120A	8285.63	-0.512241	0.0748259	-6.84577	7.60646e-12	2.06885e-11
ENSG00000048991	R3HDM1	2345.45	0.069218	0.0802028	0.863038	0.388117	0.459566
ENSG00000049089	COL9A2	19.9301	3.77556	0.731053	5.16456	2.4101e-07	5.28702e-07
ENSG00000049130	KITLG	1243.97	-0.494429	0.0922924	-5.35719	8.45241e-08	1.90739e-07
ENSG00000049167	ERCC8	526.54	-0.282269	0.114529	-2.46462	0.013716	0.021301
ENSG00000049192	ADAMTS6	39.1181	3.02113	0.484842	6.23118	4.62939e-10	1.16428e-09
ENSG00000049239	H6PD	796.428	-1.28824	0.0996735	-12.9246	3.27047e-38	1.89304e-37
ENSG00000049245	VAMP3	2663.41	-0.476917	0.0554318	-8.60367	7.72042e-18	2.63155e-17
ENSG00000049246	PER3	208.988	0.147592	0.20173	0.731634	0.464392	0.535668
ENSG00000049247	UTS2	0.900787	3.14151	2.62014	1.19899	0.230533	0.293089
ENSG00000049249	TNFRSF9	71.9933	-3.32138	0.401131	-8.28005	1.23124e-16	4.03665e-16
ENSG00000049283	EPN3	2.77799	-4.97217	1.89732	-2.62063	0.00877666	0.0138987
ENSG00000049323	LTBP1	1606.92	0.19104	0.0824459	2.31716	0.0204949	0.0311026
ENSG00000049449	RCN1	9496.49	-1.00832	0.0440289	-22.9013	4.509e-116	7.50677e-115
ENSG00000049540	ELN	12.9626	-7.28033	1.43554	-5.0715	3.947e-07	8.56437e-07
ENSG00000049541	RFC2	2899.24	0.61868	0.0640775	9.65518	4.67317e-22	1.82474e-21
ENSG00000049618	ARID1B	2443.47	0.735925	0.129788	5.6702	1.42631e-08	3.34469e-08
ENSG00000049656	CLPTM1L	5093.37	-0.678956	0.0707527	-9.59619	8.29543e-22	3.21545e-21
ENSG00000049759	NEDD4L	1515.87	-1.19546	0.0753596	-15.8634	1.13494e-56	9.08101e-56
ENSG00000049768	FOXP3	21.1648	1.77027	0.511348	3.46196	0.00053625	0.000951574
ENSG00000049769	PPP1R3F	186.523	-0.323055	0.231379	-1.39621	0.162651	0.214058
ENSG00000049860	HEXB	3908.49	-1.70356	0.0601796	-28.308	2.75327e-176	7.76732e-175
ENSG00000049883	PTCD2	724.028	-0.969132	0.120681	-8.03053	9.70515e-16	3.06963e-15
ENSG00000050030	NEXMIF	9.62689	2.17271	0.81243	2.67434	0.00748774	0.0119432
ENSG00000050130	JKAMP	2276.27	-1.65713	0.0687586	-24.1007	2.4568e-128	4.56513e-127
ENSG00000050165	DKK3	465.451	-3.91102	0.156336	-25.0168	4.01569e-138	8.2096e-137
ENSG00000050327	ARHGEF5	62.9162	-9.56943	1.21103	-7.90189	2.74706e-15	8.54595e-15
ENSG00000050344	NFE2L3	886.683	0.369407	0.0962037	3.83984	0.000123112	0.000229705
ENSG00000050393	MCUR1	1630.7	0.67211	0.091671	7.33176	2.27147e-13	6.59347e-13
ENSG00000050405	LIMA1	1733.92	2.65804	0.0728606	36.4812	2.20678e-291	1.13161e-289
ENSG00000050426	LETMD1	786.183	0.372241	0.101331	3.67353	0.000239221	0.000436944
ENSG00000050438	SLC4A8	177.264	-0.630731	0.27084	-2.32879	0.01987	0.0302185
ENSG00000050555	LAMC3	214.374	0.869303	0.238123	3.65065	0.000261582	0.000476054
ENSG00000050628	PTGER3	3.77979	5.20196	1.72478	3.01602	0.0025612	0.00427704
ENSG00000050730	TNIP3	11.7855	-2.57192	0.819273	-3.13928	0.00169366	0.00287433
ENSG00000050748	MAPK9	2143.48	0.304155	0.0651888	4.66576	3.07472e-06	6.346e-06
ENSG00000050767	COL23A1	3.9046	5.25738	1.62966	3.22606	0.00125507	0.00215084
ENSG00000050820	BCAR1	1796.65	-0.819064	0.0896963	-9.13152	6.75473e-20	2.46633e-19
ENSG00000051009	FAM160A2	900.786	-0.297872	0.110352	-2.69928	0.0069489	0.0111114
ENSG00000051108	HERPUD1	1925.55	-0.928788	0.111498	-8.33007	8.07955e-17	2.66443e-16
ENSG00000051128	HOMER3	435.984	-2.78514	0.174004	-16.0061	1.158e-57	9.41565e-57
ENSG00000051180	RAD51	745.239	-0.0965874	0.0966999	-0.998837	0.317874	0.387515
ENSG00000051341	POLQ	1262.43	-0.282163	0.0832827	-3.38801	0.000704025	0.00123606
ENSG00000051382	PIK3CB	1174.73	-1.36082	0.114879	-11.8457	2.26548e-32	1.15375e-31
ENSG00000051523	CYBA	2024.4	-2.23628	0.120898	-18.4972	2.17321e-76	2.31049e-75
ENSG00000051596	THOC3	2219.7	1.02325	0.0611353	16.7374	6.9988e-63	6.17191e-62
ENSG00000051620	HEBP2	1678	1.3979	0.0816979	17.1106	1.23735e-65	1.15018e-64
ENSG00000051825	MPHOSPH9	1776.84	0.456546	0.0982566	4.64647	3.37666e-06	6.95373e-06
ENSG00000052126	PLEKHA5	863.316	0.546022	0.0921853	5.92309	3.15941e-09	7.64544e-09
ENSG00000052344	PRSS8	3.33232	2.82196	1.49751	1.88444	0.0595057	0.0845727
ENSG00000052723	SIKE1	1545.38	1.68965	0.0865198	19.529	6.22079e-85	7.38813e-84
ENSG00000052749	RRP12	3345.49	-0.378693	0.0532109	-7.11685	1.10425e-12	3.12045e-12
ENSG00000052795	FNIP2	809.288	1.19402	0.0985365	12.1175	8.52815e-34	4.48592e-33
ENSG00000052802	MSMO1	3271.49	-0.904169	0.0578123	-15.6397	3.90329e-55	3.03929e-54
ENSG00000052841	TTC17	2087.12	-0.82993	0.0716478	-11.5835	4.99797e-31	2.47143e-30
ENSG00000052850	ALX4	556.124	2.50728	0.136784	18.3302	4.75067e-75	4.96267e-74
ENSG00000053108	FSTL4	146.579	0.675571	0.204333	3.30623	0.000945619	0.0016396
ENSG00000053254	FOXN3	1286.07	1.08517	0.103072	10.5283	6.40056e-26	2.77796e-25
ENSG00000053328	METTL24	8.1311	6.31524	1.41237	4.47136	7.77223e-06	1.56481e-05
ENSG00000053371	AKR7A2	1387.85	0.10511	0.101506	1.0355	0.300435	0.369043
ENSG00000053372	MRTO4	3281.16	-0.451821	0.0606328	-7.45175	9.21092e-14	2.71401e-13
ENSG00000053438	NNAT	0
ENSG00000053501	USE1	300.766	0.166986	0.136476	1.22355	0.221121	0.282555
ENSG00000053524	MCF2L2	43.9226	1.54519	0.47147	3.27739	0.0010477	0.00180799
ENSG00000053702	NRIP2	0.147426	0.661057	4.08047	0.162005	0.871302
ENSG00000053747	LAMA3	1846.32	-2.12142	0.0867061	-24.4668	3.33803e-132	6.40122e-131
ENSG00000053770	AP5M1	1633.43	0.26138	0.109322	2.39092	0.0168063	0.0258087
ENSG00000053900	ANAPC4	745.609	0.668198	0.0959334	6.96523	3.27867e-12	9.06627e-12
ENSG00000053918	KCNQ1	28.6847	1.92909	0.517607	3.72694	0.000193819	0.00035626
ENSG00000054116	TRAPPC3	1787.39	-0.227447	0.0695547	-3.27004	0.00107532	0.00185409
ENSG00000054118	THRAP3	7058.27	0.473625	0.0505938	9.36133	7.87383e-21	2.96354e-20
ENSG00000054148	PHPT1	2854.95	-1.21977	0.0839151	-14.5358	7.1913e-48	4.98291e-47
ENSG00000054179	ENTPD2	9.07646	-1.10519	0.737851	-1.49785	0.134173	0.179545
ENSG00000054219	LY75	9.07259	-1.44863	0.797344	-1.81683	0.0692438	0.0974137
ENSG00000054267	ARID4B	2137.19	0.457886	0.0734732	6.23202	4.6046e-10	1.1582e-09
ENSG00000054277	OPN3	936.976	-3.92053	0.109282	-35.8752	7.44108e-282	3.62543e-280
ENSG00000054282	SDCCAG8	292.64	-2.81617	0.17925	-15.7108	1.27478e-55	1.00143e-54
ENSG00000054356	PTPRN	6.94028	-6.39412	1.49363	-4.28092	1.86121e-05	3.66225e-05
ENSG00000054392	HHAT	207.402	-1.75784	0.169952	-10.3432	4.4929e-25	1.90545e-24
ENSG00000054523	KIF1B	2511.08	0.321197	0.103559	3.10159	0.00192484	0.0032521
ENSG00000054598	FOXC1	3054.38	4.36115	0.0781589	55.7985	0	0
ENSG00000054611	TBC1D22A	895.332	0.258862	0.0856952	3.02073	0.00252166	0.00421215
ENSG00000054654	SYNE2	1555.49	0.132622	0.0886262	1.49642	0.134545	0.180004
ENSG00000054690	PLEKHH1	373.375	1.75291	0.179632	9.75835	1.69901e-22	6.71035e-22
ENSG00000054793	ATP9A	2408.19	-0.539968	0.0968671	-5.57432	2.48504e-08	5.75975e-08
ENSG00000054796	SPO11	0
ENSG00000054803	CBLN4	0
ENSG00000054938	CHRDL2	9.29797	-2.73506	0.859985	-3.18036	0.00147092	0.00250985
ENSG00000054965	FAM168A	2347.13	0.251722	0.0858825	2.93101	0.00337867	0.00556951
ENSG00000054967	RELT	526.855	0.500303	0.110706	4.51919	6.20772e-06	1.25733e-05
ENSG00000054983	GALC	842.863	-3.29489	0.126802	-25.9846	7.40248e-149	1.64369e-147
ENSG00000055044	NOP58	5541.03	0.10908	0.0473986	2.30132	0.0213734	0.0323538
ENSG00000055070	SZRD1	6114.48	-0.459483	0.0647187	-7.09969	1.25036e-12	3.5242e-12
ENSG00000055118	KCNH2	83.9728	0.984247	0.262243	3.75318	0.000174602	0.000322149
ENSG00000055130	CUL1	5607.27	0.846135	0.0484492	17.4644	2.67543e-68	2.58263e-67
ENSG00000055147	FAM114A2	920.306	0.0829382	0.107176	0.77385	0.43902	0.510114
ENSG00000055163	CYFIP2	3819.83	0.274027	0.0587493	4.66435	3.09593e-06	6.38907e-06
ENSG00000055208	TAB2	2837.61	0.702123	0.0546701	12.8429	9.42576e-38	5.40366e-37
ENSG00000055211	GINM1	1132.13	-0.524842	0.0737752	-7.11407	1.12668e-12	3.18285e-12
ENSG00000055332	EIF2AK2	8286.51	-0.814809	0.0948164	-8.59354	8.43274e-18	2.87171e-17
ENSG00000055483	USP36	2885.57	-0.440646	0.0587265	-7.50336	6.22025e-14	1.84245e-13
ENSG00000055609	KMT2C	2482.96	1.27792	0.0904816	14.1236	2.71899e-45	1.79554e-44
ENSG00000055732	MCOLN3	292.266	0.772468	0.158559	4.8718	1.10585e-06	2.34177e-06
ENSG00000055813	CCDC85A	16.6788	-2.08764	0.569847	-3.66351	0.000248778	0.000453819
ENSG00000055917	PUM2	4286.79	-0.666195	0.0875433	-7.60989	2.74333e-14	8.25222e-14
ENSG00000055950	MRPL43	1779.06	-0.323723	0.0809469	-3.9992	6.35571e-05	0.000120932
ENSG00000055955	ITIH4	15.717	3.53791	0.81571	4.33722	1.44298e-05	2.85992e-05
ENSG00000055957	ITIH1	0.155688	0.661057	4.08047	0.162005	0.871302
ENSG00000056050	HPF1	932.432	0.589551	0.0875509	6.73381	1.65277e-11	4.43101e-11
ENSG00000056097	ZFR	6777.43	0.352559	0.0617102	5.71315	1.10905e-08	2.61261e-08
ENSG00000056277	ZNF280C	696.663	1.20573	0.115848	10.4079	2.28194e-25	9.74907e-25
ENSG00000056291	NPFFR2	4.22139	3.6531	1.50699	2.4241	0.0153464	0.0236844
ENSG00000056487	PHF21B	106.047	3.09458	0.286879	10.7871	3.96195e-27	1.78077e-26
ENSG00000056558	TRAF1	97.4753	-1.4839	0.234635	-6.32429	2.54397e-10	6.47433e-10
ENSG00000056586	RC3H2	2887.12	0.353703	0.112944	3.13166	0.00173821	0.00294806
ENSG00000056736	IL17RB	104.264	1.94463	0.246006	7.90478	2.68413e-15	8.35576e-15
ENSG00000056972	TRAF3IP2	432.485	-0.838168	0.151874	-5.51883	3.4127e-08	7.86077e-08
ENSG00000056998	GYG2	694.965	0.587223	0.0902699	6.50518	7.7598e-11	2.02337e-10
ENSG00000057019	DCBLD2	22629.5	-4.43193	0.0645643	-68.6438	0	0
ENSG00000057149	SERPINB3	0.726354	-3.13436	2.83884	-1.1041	0.269549	0.335927
ENSG00000057252	SOAT1	2930.99	-0.789379	0.0879238	-8.97798	2.75777e-19	9.85607e-19
ENSG00000057294	PKP2	761.619	1.02798	0.0964219	10.6613	1.54432e-26	6.81904e-26
ENSG00000057468	MSH4	11.5406	6.82122	1.34272	5.08015	3.77143e-07	8.19299e-07
ENSG00000057593	F7	4.12971	-5.64409	1.64952	-3.42166	0.000622397	0.00109783
ENSG00000057608	GDI2	10501	-0.753828	0.0513541	-14.679	8.78582e-49	6.1777e-48
ENSG00000057657	PRDM1	117.545	-3.77339	0.310008	-12.1719	4.38652e-34	2.32515e-33
ENSG00000057663	ATG5	1272.64	-0.124223	0.0803463	-1.54609	0.122082	0.164678
ENSG00000057704	TMCC3	170.403	2.75767	0.208801	13.2072	7.97753e-40	4.77391e-39
ENSG00000057757	PITHD1	1133.37	0.513884	0.0820371	6.26404	3.75122e-10	9.47529e-10
ENSG00000057935	MTA3	1561.28	-0.431228	0.0671335	-6.42343	1.33234e-10	3.43741e-10
ENSG00000058056	USP13	1395.35	0.138518	0.0975778	1.41956	0.155736	0.205789
ENSG00000058063	ATP11B	1553.56	0.616501	0.0839989	7.33939	2.14574e-13	6.23338e-13
ENSG00000058085	LAMC2	1210.77	-5.60138	0.149331	-37.5098	6.3697e-308	3.47767e-306
ENSG00000058091	CDK14	365.158	6.85323	0.37819	18.1211	2.17148e-73	2.22089e-72
ENSG00000058262	SEC61A1	10780.4	-0.343573	0.0426726	-8.05137	8.1875e-16	2.5967e-15
ENSG00000058272	PPP1R12A	2455	0.295936	0.11799	2.50815	0.0121365	0.0189426
ENSG00000058335	RASGRF1	14.0936	-3.80118	0.753338	-5.04578	4.5167e-07	9.77197e-07
ENSG00000058404	CAMK2B	51.6088	3.12708	0.409258	7.64086	2.15771e-14	6.51806e-14
ENSG00000058453	CROCC	230.818	0.805445	0.162336	4.9616	6.99162e-07	1.49747e-06
ENSG00000058600	POLR3E	2172.96	1.00455	0.0908461	11.0577	2.01104e-28	9.38435e-28
ENSG00000058668	ATP2B4	1599.25	-0.132748	0.0662547	-2.00359	0.0451136	0.065415
ENSG00000058673	ZC3H11A	4099.63	0.416473	0.0479236	8.69035	3.61329e-18	1.24441e-17
ENSG00000058729	RIOK2	1280.64	0.824281	0.196153	4.20224	2.64284e-05	5.14731e-05
ENSG00000058799	YIPF1	652.594	-0.265699	0.118918	-2.2343	0.0254634	0.0381592
ENSG00000058804	NDC1	4398.46	0.491281	0.0479059	10.2551	1.12233e-24	4.71141e-24
ENSG00000058866	DGKG	545.163	-10.1515	0.733569	-13.8385	1.49351e-43	9.57649e-43
ENSG00000059122	FLYWCH1	1140.61	-0.463898	0.135407	-3.42596	0.000612635	0.00108133
ENSG00000059145	UNKL	1116.3	-1.12052	0.0796135	-14.0745	5.45007e-45	3.57743e-44
ENSG00000059377	TBXAS1	132.612	-2.10307	0.254001	-8.27975	1.23433e-16	4.04553e-16
ENSG00000059378	PARP12	685.969	-10.3672	0.803826	-12.8973	4.66254e-38	2.68875e-37
ENSG00000059573	ALDH18A1	5178.47	0.806584	0.0546771	14.7518	2.99681e-49	2.12489e-48
ENSG00000059588	TARBP1	2042.73	0.816025	0.0720159	11.3312	9.19664e-30	4.42158e-29
ENSG00000059691	GATB	928.531	0.280139	0.0848494	3.3016	0.000961338	0.00166545
ENSG00000059728	MXD1	184.565	-0.284398	0.203496	-1.39756	0.162244	0.213569
ENSG00000059758	CDK17	896.237	-0.131848	0.0901657	-1.46228	0.143663	0.19117
ENSG00000059769	DNAJC25	389.671	0.082419	0.142514	0.578322	0.563047	0.629287
ENSG00000059804	SLC2A3	854.044	-2.19924	0.186784	-11.7742	5.30021e-32	2.67576e-31
ENSG00000059915	PSD	10.3457	0.876994	0.950829	0.922347	0.356348	0.426901
ENSG00000060069	CTDP1	785.237	-0.4657	0.0880662	-5.28807	1.23614e-07	2.75865e-07
ENSG00000060138	YBX3	7284.68	0.260236	0.0639869	4.06702	4.76179e-05	9.12963e-05
ENSG00000060140	STYK1	26.6916	0.588963	0.620468	0.949224	0.342507	0.412988
ENSG00000060237	WNK1	10424.3	-0.370433	0.093364	-3.96762	7.2593e-05	0.000137505
ENSG00000060303	RPS17P5	0.147426	0.661057	4.08047	0.162005	0.871302
ENSG00000060339	CCAR1	5286.83	0.359315	0.100019	3.59247	0.000327552	0.000592396
ENSG00000060491	OGFR	1931.51	0.124139	0.0800792	1.5502	0.121094	0.163517
ENSG00000060558	GNA15	2.95222	-0.380074	1.28347	-0.29613	0.767131	0.810118
ENSG00000060566	CREB3L3	5.13966	-2.74747	1.22998	-2.23376	0.0254989	0.0382031
ENSG00000060642	PIGV	391.516	-2.15311	0.125577	-17.1457	6.76216e-66	6.31418e-65
ENSG00000060656	PTPRU	2265.63	1.81298	0.0744663	24.3463	6.35139e-131	1.208e-129
ENSG00000060688	SNRNP40	3184.65	1.41754	0.0833478	17.0076	7.21785e-65	6.62963e-64
ENSG00000060709	RIMBP2	3.47324	3.87465	1.73766	2.22981	0.0257602	0.0385759
ENSG00000060718	COL11A1	192.693	-8.54434	0.831442	-10.2765	8.99002e-25	3.78331e-24
ENSG00000060749	QSER1	4057.83	0.287882	0.0979677	2.93854	0.00329762	0.00544122
ENSG00000060762	MPC1	803.911	3.44724	0.112138	30.741	1.61174e-207	5.54051e-206
ENSG00000060971	ACAA1	1628.84	-0.191969	0.0961917	-1.99569	0.0459677	0.0665547
ENSG00000060982	BCAT1	2520.48	0.860527	0.0737824	11.663	1.96901e-31	9.84399e-31
ENSG00000061273	HDAC7	1707.99	-1.79143	0.105914	-16.9139	3.55291e-64	3.20938e-63
ENSG00000061337	LZTS1	60.7836	4.73262	0.495445	9.55226	1.26895e-21	4.88905e-21
ENSG00000061455	PRDM6	323.619	7.0351	0.370191	19.004	1.58054e-80	1.77171e-79
ENSG00000061492	WNT8A	0.913091	3.15684	2.61359	1.20785	0.227103	0.289203
ENSG00000061656	SPAG4	33.1947	-0.743723	0.450518	-1.65082	0.0987758	0.135329
ENSG00000061676	NCKAP1	8464.25	-0.634725	0.0589392	-10.7691	4.81488e-27	2.15682e-26
ENSG00000061794	MRPS35	3734.18	-1.05277	0.0541898	-19.4275	4.51868e-84	5.30216e-83
ENSG00000061918	GUCY1B1	452.717	4.34916	0.174295	24.9529	1.98707e-137	4.03126e-136
ENSG00000061936	SFSWAP	2106.46	1.03354	0.0600129	17.2219	1.81967e-66	1.7103e-65
ENSG00000061938	TNK2	467.164	-0.973579	0.118113	-8.24278	1.68255e-16	5.48529e-16
ENSG00000061987	MON2	1903.16	-0.445823	0.117265	-3.80183	0.000143631	0.000266623
ENSG00000062038	CDH3	29.3184	2.06893	0.456194	4.53521	5.75469e-06	1.16773e-05
ENSG00000062096	ARSF	0
ENSG00000062194	GPBP1	3217.91	0.671049	0.0572419	11.723	9.71137e-32	4.87881e-31
ENSG00000062282	DGAT2	293.382	0.768758	0.141691	5.42559	5.77634e-08	1.31534e-07
ENSG00000062370	ZNF112	123.81	-0.198182	0.239656	-0.826944	0.408269	0.479482
ENSG00000062485	CS	10968.1	-0.0659413	0.0445113	-1.48145	0.138487	0.184785
ENSG00000062524	LTK	34.5145	5.46984	0.809909	6.75364	1.44178e-11	3.87655e-11
ENSG00000062582	MRPS24	2466.36	-0.437915	0.100548	-4.35527	1.32902e-05	2.6397e-05
ENSG00000062598	ELMO2	1653.29	-0.229878	0.0831034	-2.76617	0.00567181	0.00915132
ENSG00000062650	WAPL	2853.01	1.22337	0.0670891	18.2349	2.7261e-74	2.82234e-73
ENSG00000062716	VMP1	4806.78	-1.88847	0.0558066	-33.8395	5.177e-251	2.22455e-249
ENSG00000062725	APPBP2	1823.49	0.20264	0.0954853	2.12222	0.0338196	0.0499636
ENSG00000062822	POLD1	3083.04	0.607564	0.0664515	9.14297	6.07626e-20	2.21991e-19
ENSG00000063015	SEZ6	0.445644	2.12738	3.99555	0.532438	0.594423
ENSG00000063046	EIF4B	23472.3	0.0559419	0.0459209	1.21822	0.22314	0.284642
ENSG00000063127	SLC6A16	27.1069	-1.37007	0.525703	-2.60616	0.0091564	0.0144779
ENSG00000063169	BICRA	500.027	0.0864978	0.142656	0.606336	0.544292	0.611233
ENSG00000063176	SPHK2	655.994	-0.556403	0.10148	-5.48291	4.18395e-08	9.60626e-08
ENSG00000063177	RPL18	22950.4	-0.1187	0.082994	-1.43022	0.152653	0.201974
ENSG00000063180	CA11	304.868	0.393577	0.152621	2.5788	0.00991454	0.0156207
ENSG00000063241	ISOC2	1198.94	-0.392116	0.115553	-3.39339	0.000690336	0.00121294
ENSG00000063244	U2AF2	15536.5	-0.339735	0.0507292	-6.69704	2.12689e-11	5.67343e-11
ENSG00000063245	EPN1	4929.19	-0.731263	0.104991	-6.96503	3.28344e-12	9.07811e-12
ENSG00000063322	MED29	3600.57	-0.909375	0.0567857	-16.0142	1.01751e-57	8.2806e-57
ENSG00000063438	AHRR	38.5096	0.527554	0.387844	1.36022	0.173759	0.227451
ENSG00000063515	GSC2	0
ENSG00000063587	ZNF275	1375.72	2.12404	0.0788139	26.9501	5.69197e-160	1.38662e-158
ENSG00000063601	MTMR1	3136.78	1.72525	0.0736856	23.4137	3.09685e-121	5.38771e-120
ENSG00000063660	GPC1	6373.67	-3.56686	0.0849026	-42.0112	0	0
ENSG00000063761	ADCK1	355.932	0.297519	0.132386	2.24736	0.0246171	0.0369386
ENSG00000063854	HAGH	1418.87	-0.5634	0.0798163	-7.05871	1.68055e-12	4.71097e-12
ENSG00000063978	RNF4	2403.49	-0.875045	0.0598741	-14.6148	2.26148e-48	1.58057e-47
ENSG00000064012	CASP8	1307.41	-1.87063	0.103977	-17.9909	2.29759e-72	2.31794e-71
ENSG00000064042	LIMCH1	2232.67	-2.58781	0.0908067	-28.498	1.24064e-178	3.5214e-177
ENSG00000064102	INTS13	2001.27	0.0583415	0.0634236	0.91987	0.357641	0.428204
ENSG00000064115	TM7SF3	4363.48	-1.47125	0.0654744	-22.4706	8.05601e-112	1.28474e-110
ENSG00000064195	DLX3	20.7131	2.55229	0.678794	3.76004	0.000169888	0.000313825
ENSG00000064199	SPA17	520.327	-0.1061	0.112679	-0.941615	0.34639	0.416966
ENSG00000064201	TSPAN32	0
ENSG00000064205	CCN5	266.155	-11.6477	1.18948	-9.79224	1.21575e-22	4.8181e-22
ENSG00000064218	DMRT3	1.9948	3.20539	1.89969	1.68732	0.0915416	0.126238
ENSG00000064225	ST3GAL6	187.843	2.8491	0.276441	10.3064	6.59492e-25	2.78231e-24
ENSG00000064270	ATP2C2	6.77667	-2.42536	1.32709	-1.82758	0.0676132	0.0952641
ENSG00000064300	NGFR	24.3908	1.07792	0.456558	2.36097	0.0182273	0.0278573
ENSG00000064309	CDON	736.428	1.83727	0.121304	15.146	8.05177e-52	5.96667e-51
ENSG00000064313	TAF2	2037.6	0.14666	0.0670309	2.18795	0.0286731	0.042714
ENSG00000064393	HIPK2	4195.53	-0.28226	0.118861	-2.37471	0.0175625	0.0269076
ENSG00000064419	TNPO3	5313.16	-0.221083	0.0568302	-3.89024	0.000100146	0.000188025
ENSG00000064489	BORCS8-MEF2B	78.7258	-0.384221	0.356625	-1.07738	0.28131	0.348666
ENSG00000064490	RFXANK	1000.48	0.842802	0.0834924	10.0944	5.851e-24	2.40239e-23
ENSG00000064545	TMEM161A	1476.45	1.63059	0.102357	15.9304	3.89796e-57	3.13917e-56
ENSG00000064547	LPAR2	45.5253	0.456831	0.373173	1.22418	0.220884	0.282271
ENSG00000064601	CTSA	3893.83	-1.95036	0.078489	-24.8488	2.66379e-136	5.32845e-135
ENSG00000064607	SUGP2	3696.07	1.34093	0.0688602	19.4732	1.85182e-84	2.18672e-83
ENSG00000064651	SLC12A2	3275.45	-1.33193	0.117882	-11.2988	1.32972e-29	6.37358e-29
ENSG00000064652	SNX24	495.845	-1.58576	0.137017	-11.5734	5.61992e-31	2.7738e-30
ENSG00000064655	EYA2	462.826	1.79965	0.121227	14.8453	7.46397e-50	5.34956e-49
ENSG00000064666	CNN2	1848.98	-1.65555	0.0813631	-20.3477	4.86934e-92	6.28578e-91
ENSG00000064687	ABCA7	356.003	-0.188804	0.14488	-1.30317	0.192515	0.249122
ENSG00000064692	SNCAIP	30.2758	5.33684	0.914573	5.83534	5.36824e-09	1.28366e-08
ENSG00000064703	DDX20	1348.07	1.17061	0.071881	16.2853	1.25417e-59	1.04917e-58
ENSG00000064726	BTBD1	4698.84	0.200754	0.0490552	4.0924	4.26923e-05	8.20221e-05
ENSG00000064763	FAR2	486.004	7.19257	0.358041	20.0887	9.27364e-90	1.16237e-88
ENSG00000064787	BCAS1	137.782	-4.89613	0.329955	-14.8388	8.22648e-50	5.88924e-49
ENSG00000064835	POU1F1	0.49199	-2.57329	3.87618	-0.663873	0.506772
ENSG00000064886	CHI3L2	0.571338	-2.68111	3.70365	-0.723911	0.46912
ENSG00000064932	SBNO2	1123.6	-0.77006	0.464543	-1.65767	0.0973839	0.133639
ENSG00000064933	PMS1	758.087	0.183907	0.0928927	1.97978	0.047728	0.068895
ENSG00000064961	HMG20B	1402.16	0.834801	0.0861541	9.68962	3.33767e-22	1.30905e-21
ENSG00000064989	CALCRL	45.5661	2.0209	0.441512	4.57723	4.71171e-06	9.61349e-06
ENSG00000064995	TAF11	1190.17	1.42815	0.089823	15.8996	6.3784e-57	5.13008e-56
ENSG00000064999	ANKS1A	1705.67	1.58837	0.0811183	19.5809	2.25126e-85	2.68229e-84
ENSG00000065000	AP3D1	7063.35	0.778021	0.0554068	14.042	8.62853e-45	5.64581e-44
ENSG00000065029	ZNF76	487.494	0.888752	0.109668	8.10399	5.31846e-16	1.69896e-15
ENSG00000065054	SLC9A3R2	1066.38	-1.03036	0.0918518	-11.2177	3.33982e-29	1.58642e-28
ENSG00000065057	NTHL1	1165.81	-0.012036	0.0874052	-0.137704	0.890475	0.914443
ENSG00000065060	UHRF1BP1	1655.56	-0.263608	0.0813005	-3.24238	0.00118534	0.00203717
ENSG00000065135	GNAI3	3522.86	0.0627775	0.053872	1.16531	0.243894	0.307735
ENSG00000065150	IPO5	14488.2	1.14027	0.0502123	22.709	3.64679e-114	5.94863e-113
ENSG00000065154	OAT	4758.89	1.21854	0.0511701	23.8135	2.41813e-125	4.35381e-124
ENSG00000065183	WDR3	4678.86	1.21578	0.0722307	16.8319	1.42484e-63	1.2716e-62
ENSG00000065243	PKN2	3029.34	0.962259	0.0915049	10.5159	7.29609e-26	3.16294e-25
ENSG00000065268	WDR18	1359.86	0.548341	0.100735	5.44341	5.22707e-08	1.19216e-07
ENSG00000065308	TRAM2	1852.55	-1.62598	0.0787785	-20.6398	1.20474e-94	1.59059e-93
ENSG00000065320	NTN1	718.574	5.39162	0.19464	27.7006	6.87589e-169	1.826e-167
ENSG00000065325	GLP2R	443.427	-12.3853	1.18673	-10.4365	1.68988e-25	7.25466e-25
ENSG00000065328	MCM10	3250.19	0.791731	0.0666221	11.8839	1.4347e-32	7.33671e-32
ENSG00000065357	DGKA	394.01	-1.01913	0.126506	-8.05599	7.8838e-16	2.50166e-15
ENSG00000065361	ERBB3	164.349	0.0905556	0.277556	0.326261	0.744227	0.789749
ENSG00000065371	ROPN1	0
ENSG00000065413	ANKRD44	187.612	0.680589	0.170193	3.99893	6.36293e-05	0.000121044
ENSG00000065427	KARS1	8049.8	-0.469	0.0598428	-7.83721	4.60672e-15	1.42358e-14
ENSG00000065457	ADAT1	953.114	-0.857146	0.0914859	-9.36915	7.31156e-21	2.75471e-20
ENSG00000065485	PDIA5	541.512	-1.05926	0.107878	-9.81899	9.32778e-23	3.71251e-22
ENSG00000065491	TBC1D22B	690.021	0.57152	0.0952595	5.99961	1.97786e-09	4.83347e-09
ENSG00000065518	NDUFB4	2446.79	-0.93729	0.0658781	-14.2276	6.17262e-46	4.13654e-45
ENSG00000065526	SPEN	6467.79	1.48493	0.0700243	21.206	8.40939e-100	1.17814e-98
ENSG00000065534	MYLK	1609.75	-3.93986	0.28418	-13.864	1.04743e-43	6.73247e-43
ENSG00000065548	ZC3H15	4936.97	0.401897	0.0477123	8.42334	3.6589e-17	1.22115e-16
ENSG00000065559	MAP2K4	2357.18	-0.467936	0.0588611	-7.94983	1.8676e-15	5.84232e-15
ENSG00000065600	PACC1	726.244	0.169859	0.0925784	1.83476	0.0665414	0.0938893
ENSG00000065609	SNAP91	51.8259	0.42634	0.49623	0.859158	0.390253	0.461742
ENSG00000065613	SLK	4583.48	0.309389	0.064347	4.80814	1.52345e-06	3.20124e-06
ENSG00000065615	CYB5R4	1307.77	-0.518098	0.094463	-5.48466	4.14256e-08	9.51358e-08
ENSG00000065618	COL17A1	29.32	-3.63914	0.728311	-4.99669	5.83227e-07	1.25451e-06
ENSG00000065621	GSTO2	140.74	2.3365	0.219489	10.6452	1.8354e-26	8.0851e-26
ENSG00000065665	SEC61A2	794.13	0.356064	0.103105	3.4534	0.000553558	0.0009806
ENSG00000065675	PRKCQ	331.149	-0.728961	0.127642	-5.71098	1.12325e-08	2.64505e-08
ENSG00000065717	TLE2	117.805	1.27732	0.256664	4.97663	6.47018e-07	1.38851e-06
ENSG00000065802	ASB1	1382.96	-1.01184	0.0804858	-12.5717	3.02273e-36	1.67947e-35
ENSG00000065809	FAM107B	5114.8	-3.00651	0.083833	-35.8631	1.14741e-281	5.56118e-280
ENSG00000065833	ME1	3533.36	-2.57521	0.0581418	-44.2918	0	0
ENSG00000065882	TBC1D1	1152.92	-0.665197	0.11486	-5.79136	6.98167e-09	1.66197e-08
ENSG00000065883	CDK13	2023.54	0.505586	0.0718141	7.04021	1.91954e-12	5.36471e-12
ENSG00000065911	MTHFD2	9183.96	-0.853807	0.0573251	-14.8941	3.59949e-50	2.59183e-49
ENSG00000065923	SLC9A7	1429.32	-1.34593	0.173141	-7.77359	7.62912e-15	2.3412e-14
ENSG00000065970	FOXJ2	1111.9	-0.22681	0.0860794	-2.6349	0.0084163	0.0133657
ENSG00000065978	YBX1	34631	0.497234	0.064477	7.71181	1.24044e-14	3.7866e-14
ENSG00000065989	PDE4A	317.271	0.652077	0.155781	4.18587	2.84077e-05	5.52643e-05
ENSG00000066027	PPP2R5A	1386.92	-0.189771	0.0694741	-2.73153	0.00630408	0.0101301
ENSG00000066032	CTNNA2	5.71852	-5.97756	1.66372	-3.59288	0.000327044	0.000591534
ENSG00000066044	ELAVL1	4977.57	0.502728	0.0453506	11.0854	1.4776e-28	6.91945e-28
ENSG00000066056	TIE1	3.55812	-0.0286532	1.46287	-0.019587	0.984373	0.98858
ENSG00000066084	DIP2B	2654.64	-0.737324	0.0809026	-9.11372	7.96066e-20	2.89866e-19
ENSG00000066117	SMARCD1	4112.8	0.827306	0.0624932	13.2383	5.2703e-40	3.16099e-39
ENSG00000066135	KDM4A	2858.03	0.950563	0.0570192	16.6709	2.13259e-62	1.8682e-61
ENSG00000066136	NFYC	1890.62	0.224905	0.103238	2.17851	0.0293682	0.0437108
ENSG00000066185	ZMYND12	3.04165	-2.52896	1.54105	-1.64106	0.100784	0.137867
ENSG00000066230	SLC9A3	705.857	0.58453	0.0931702	6.27378	3.52378e-10	8.91413e-10
ENSG00000066248	NGEF	337.169	-0.71055	0.135748	-5.23432	1.6559e-07	3.66676e-07
ENSG00000066279	ASPM	3504.02	0.26662	0.0940551	2.83473	0.00458649	0.00745983
ENSG00000066294	CD84	1.83322	3.04775	1.89859	1.60528	0.108433	0.147418
ENSG00000066322	ELOVL1	3479.08	-1.43174	0.0639084	-22.403	3.67845e-111	5.81132e-110
ENSG00000066336	SPI1	1.46913	3.84164	2.20041	1.74587	0.0808336	0.112474
ENSG00000066379	ZNRD1	169.302	2.28371	0.230217	9.91981	3.41422e-23	1.37361e-22
ENSG00000066382	MPPED2	139.599	8.1814	0.751216	10.8909	1.27414e-27	5.8027e-27
ENSG00000066405	CLDN18	0
ENSG00000066422	ZBTB11	1483.52	-0.170801	0.0761863	-2.24189	0.0249686	0.0374328
ENSG00000066427	ATXN3	559.083	-0.634725	0.128873	-4.92522	8.4267e-07	1.79592e-06
ENSG00000066455	GOLGA5	1456.26	-0.517728	0.0732374	-7.06917	1.5586e-12	4.3777e-12
ENSG00000066468	FGFR2	595.743	5.61266	0.218405	25.6984	1.2174e-145	2.65867e-144
ENSG00000066557	LRRC40	1821.61	1.85957	0.0742063	25.0595	1.37545e-138	2.84009e-137
ENSG00000066583	ISOC1	1491.19	1.16435	0.072008	16.1697	8.24917e-59	6.83003e-58
ENSG00000066629	EML1	1845.16	-0.547022	0.093677	-5.83945	5.23749e-09	1.2532e-08
ENSG00000066651	TRMT11	551.306	-0.224109	0.109941	-2.03844	0.0415058	0.0605527
ENSG00000066654	THUMPD1	2165.12	0.0826726	0.0628257	1.3159	0.188206	0.244057
ENSG00000066697	MSANTD3	1472.85	-1.35975	0.0689617	-19.7174	1.52776e-86	1.84634e-85
ENSG00000066735	KIF26A	534.062	2.16007	0.116036	18.6155	2.40562e-77	2.6023e-76
ENSG00000066739	ATG2B	1501.08	0.146402	0.126725	1.15528	0.247977	0.312314
ENSG00000066777	ARFGEF1	2067.17	-0.840436	0.0775312	-10.84	2.22528e-27	1.00726e-26
ENSG00000066813	ACSM2B	0.60072	-1.66964	3.15413	-0.529348	0.596564
ENSG00000066827	ZFAT	410.15	-0.636107	0.136839	-4.64857	3.34245e-06	6.88557e-06
ENSG00000066855	MTFR1	1654.88	-0.678852	0.0798544	-8.50112	1.87774e-17	6.32032e-17
ENSG00000066923	STAG3	42.211	1.34718	0.439448	3.06561	0.00217223	0.00365114
ENSG00000066926	FECH	1673.37	-0.611711	0.0825026	-7.41445	1.22133e-13	3.58161e-13
ENSG00000066933	MYO9A	1779.31	0.0843315	0.103175	0.817363	0.413721	0.485088
ENSG00000067048	DDX3Y	1188.33	-13.808	1.18404	-11.6617	1.99911e-31	9.99176e-31
ENSG00000067057	PFKP	11589.8	-3.84628	0.0717682	-53.593	0	0
ENSG00000067064	IDI1	5328.38	-0.682817	0.0532556	-12.8215	1.24269e-37	7.10878e-37
ENSG00000067066	SP100	1314.93	-5.56177	0.132121	-42.0962	0	0
ENSG00000067082	KLF6	1789.64	-1.70373	0.0719814	-23.6691	7.50688e-124	1.33733e-122
ENSG00000067113	PLPP1	711.822	-1.84667	0.105204	-17.5533	5.6157e-69	5.46639e-68
ENSG00000067141	NEO1	4527.93	-0.401871	0.0556791	-7.21764	5.28968e-13	1.51345e-12
ENSG00000067167	TRAM1	13446.8	-2.26009	0.0467774	-48.3157	0	0
ENSG00000067177	PHKA1	2721.95	-0.285795	0.058883	-4.85361	1.21236e-06	2.56117e-06
ENSG00000067182	TNFRSF1A	8759.29	-3.43101	0.0527646	-65.0249	0	0
ENSG00000067191	CACNB1	186.783	-1.10883	0.171334	-6.47174	9.68837e-11	2.51356e-10
ENSG00000067208	EVI5	848.452	0.792531	0.135457	5.8508	4.892e-09	1.1725e-08
ENSG00000067221	STOML1	283.487	-0.37177	0.141373	-2.62972	0.00854558	0.0135583
ENSG00000067225	PKM	158547	-2.02233	0.0508481	-39.7719	0	0
ENSG00000067248	DHX29	2622.68	-0.130382	0.071667	-1.81927	0.0688698	0.0969389
ENSG00000067334	DNTTIP2	3647.8	0.751038	0.0622279	12.0692	1.53714e-33	8.01513e-33
ENSG00000067365	METTL22	411.183	-0.59857	0.141267	-4.23715	2.26378e-05	4.42902e-05
ENSG00000067369	TP53BP1	2890.78	0.139078	0.0730903	1.90283	0.0570632	0.0813817
ENSG00000067445	TRO	574.557	5.73639	0.23306	24.6134	9.08554e-134	1.76417e-132
ENSG00000067533	RRP15	1806.21	0.109063	0.0753874	1.44671	0.147979	0.196322
ENSG00000067560	RHOA	18289.8	0.125944	0.0407726	3.08893	0.0020088	0.00338655
ENSG00000067596	DHX8	3654.01	-0.352096	0.0598496	-5.88302	4.0284e-09	9.69395e-09
ENSG00000067601	PMS2P4	86.3809	0.0857629	0.28754	0.298264	0.765502	0.808548
ENSG00000067606	PRKCZ	498.863	0.252912	0.111686	2.2645	0.0235434	0.0354364
ENSG00000067646	ZFY	168.505	-10.9897	1.1905	-9.23116	2.67712e-20	9.90144e-20
ENSG00000067704	IARS2	8263.02	-0.24497	0.0509688	-4.80628	1.53762e-06	3.22992e-06
ENSG00000067715	SYT1	937.862	-1.93111	0.0930443	-20.7547	1.11143e-95	1.48642e-94
ENSG00000067798	NAV3	262.969	-2.63369	0.236975	-11.1138	1.0746e-28	5.0488e-28
ENSG00000067829	IDH3G	2900.62	1.15087	0.0683732	16.8322	1.41804e-63	1.26614e-62
ENSG00000067836	ROGDI	389.601	0.579706	0.146459	3.95815	7.55317e-05	0.000142881
ENSG00000067840	PDZD4	198.998	1.35556	0.175978	7.70297	1.32938e-14	4.05276e-14
ENSG00000067842	ATP2B3	11.7222	3.99513	0.971531	4.1122	3.91902e-05	7.54968e-05
ENSG00000067900	ROCK1	3615.25	0.629029	0.0876344	7.17788	7.0802e-13	2.01827e-12
ENSG00000067955	CBFB	2270.21	0.582492	0.0789316	7.37971	1.58638e-13	4.63164e-13
ENSG00000067992	PDK3	1365.83	0.330415	0.112598	2.93447	0.00334113	0.00550958
ENSG00000068001	HYAL2	1501.04	0.506455	0.0721143	7.02295	2.17238e-12	6.0504e-12
ENSG00000068024	HDAC4	695.87	-0.764318	0.107643	-7.10046	1.24341e-12	3.50621e-12
ENSG00000068028	RASSF1	577.567	1.2285	0.10942	11.2274	2.99209e-29	1.42343e-28
ENSG00000068078	FGFR3	1113.44	4.43506	0.161899	27.3941	3.22746e-165	8.21828e-164
ENSG00000068079	IFI35	2615.96	-5.66616	0.111115	-50.9937	0	0
ENSG00000068097	HEATR6	1470.93	-0.31611	0.0936705	-3.37471	0.000738946	0.00129394
ENSG00000068120	COASY	4471.73	-0.942799	0.0586988	-16.0616	4.73798e-58	3.87792e-57
ENSG00000068137	PLEKHH3	739.775	0.0730911	0.0896865	0.814962	0.415094	0.486359
ENSG00000068305	MEF2A	1844.79	0.640113	0.0989697	6.46777	9.94621e-11	2.57865e-10
ENSG00000068308	OTUD5	2845.36	-0.178062	0.0578383	-3.07861	0.00207966	0.00350093
ENSG00000068323	TFE3	3039.78	-1.40898	0.0583278	-24.1562	6.4334e-129	1.19903e-127
ENSG00000068354	TBC1D25	608.787	-0.252238	0.10888	-2.31666	0.0205221	0.0311414
ENSG00000068366	ACSL4	3445.42	-0.115317	0.0605722	-1.9038	0.0569365	0.0812135
ENSG00000068383	INPP5A	891.058	-0.0235572	0.0824721	-0.285638	0.775155	0.817244
ENSG00000068394	GPKOW	1107.71	-0.338976	0.0778521	-4.35411	1.33611e-05	2.6532e-05
ENSG00000068400	GRIPAP1	1677.91	0.0770508	0.0697103	1.1053	0.26903	0.335415
ENSG00000068438	FTSJ1	1812.29	-0.0551947	0.0769681	-0.717112	0.473305	0.543768
ENSG00000068489	PRR11	2857.97	-0.614011	0.0805348	-7.62417	2.45604e-14	7.3988e-14
ENSG00000068615	REEP1	313.971	3.09169	0.172037	17.9711	3.28437e-72	3.31166e-71
ENSG00000068650	ATP11A	1514.13	0.131679	0.115162	1.14342	0.252864	0.317672
ENSG00000068654	POLR1A	5865.69	0.261367	0.0996491	2.62288	0.00871911	0.0138123
ENSG00000068697	LAPTM4A	6112.59	-1.08773	0.0572045	-19.0148	1.2868e-80	1.44506e-79
ENSG00000068724	TTC7A	1509.03	-2.25339	0.0816696	-27.5915	1.40798e-167	3.68117e-166
ENSG00000068745	IP6K2	1741.27	0.577482	0.0688689	8.38524	5.06203e-17	1.68157e-16
ENSG00000068781	STON1-GTF2A1L	26.4217	8.01598	1.25546	6.3849	1.7151e-10	4.40779e-10
ENSG00000068784	SRBD1	1089.09	0.168752	0.0758247	2.22555	0.026044	0.0389695
ENSG00000068796	KIF2A	3383.19	0.343092	0.0762171	4.5015	6.74744e-06	1.36307e-05
ENSG00000068831	RASGRP2	18.6617	2.83279	0.602753	4.69975	2.60482e-06	5.39959e-06
ENSG00000068878	PSME4	4168.64	-0.262665	0.084806	-3.09725	0.00195326	0.00329801
ENSG00000068885	IFT80	733.099	-0.594235	0.122082	-4.8675	1.13016e-06	2.39106e-06
ENSG00000068903	SIRT2	1509.27	0.0370469	0.0764308	0.484712	0.627881	0.689004
ENSG00000068912	ERLEC1	2607.08	-1.47309	0.05589	-26.357	4.26408e-153	9.7721e-152
ENSG00000068971	PPP2R5B	363.81	0.283653	0.124841	2.27211	0.02308	0.0347812
ENSG00000068976	PYGM	6.31348	1.70977	1.00945	1.69375	0.0903119	0.1247
ENSG00000068985	PAGE1	2.78485	-5.0694	1.84563	-2.74671	0.00601966	0.00968561
ENSG00000069011	PITX1	979.85	1.12543	0.105981	10.6192	2.42721e-26	1.06516e-25
ENSG00000069018	TRPC7	0.147426	0.661057	4.08047	0.162005	0.871302
ENSG00000069020	MAST4	378.586	-0.631041	0.136585	-4.62013	3.83492e-06	7.86399e-06
ENSG00000069122	ADGRF5	0
ENSG00000069188	SDK2	507.06	1.70977	0.158813	10.7659	4.98622e-27	2.23195e-26
ENSG00000069206	ADAM7	0
ENSG00000069248	NUP133	4626.46	1.55158	0.0694673	22.3355	1.67197e-110	2.62357e-109
ENSG00000069275	NUCKS1	25408.5	0.92754	0.0471649	19.6659	4.22619e-86	5.0876e-85
ENSG00000069329	VPS35	7052.45	-0.421284	0.0494847	-8.51342	1.68883e-17	5.69272e-17
ENSG00000069345	DNAJA2	3864.31	-0.0292258	0.0541487	-0.539732	0.589382	0.653722
ENSG00000069399	BCL3	605.82	-4.67507	0.178337	-26.2148	1.80389e-151	4.09359e-150
ENSG00000069424	KCNAB2	1165.73	-3.59587	0.120176	-29.9217	1.02885e-196	3.29285e-195
ENSG00000069431	ABCC9	191.975	0.475281	0.163801	2.90157	0.00371293	0.00609562
ENSG00000069482	GAL	377.548	3.40593	0.17017	20.0149	4.08826e-89	5.07627e-88
ENSG00000069493	CLEC2D	61.47	-0.0102871	0.328503	-0.0313149	0.975018	0.980884
ENSG00000069509	FUNDC1	1072.39	0.543101	0.0756656	7.17765	7.09191e-13	2.0213e-12
ENSG00000069535	MAOB	18.6386	0.916266	0.508139	1.80318	0.07136	0.100173
ENSG00000069667	RORA	84.3271	-0.0440447	0.311881	-0.141223	0.887694	0.912216
ENSG00000069696	DRD4	0
ENSG00000069702	TGFBR3	1266.17	0.693433	0.103327	6.71107	1.932e-11	5.16694e-11
ENSG00000069764	PLA2G10	0.573219	-2.78513	3.69517	-0.753722	0.451016
ENSG00000069812	HES2	28.7886	-1.64488	0.525548	-3.12983	0.00174909	0.00296596
ENSG00000069849	ATP1B3	4742.27	-0.660216	0.068105	-9.69408	3.19494e-22	1.2536e-21
ENSG00000069869	NEDD4	3522.32	-0.4551	0.101962	-4.46343	8.06561e-06	1.62195e-05
ENSG00000069943	PIGB	429.533	-1.62834	0.119479	-13.6287	2.70171e-42	1.69891e-41
ENSG00000069956	MAPK6	3863.14	-1.05596	0.0710767	-14.8566	6.30292e-50	4.5279e-49
ENSG00000069966	GNB5	1439.47	-1.87686	0.0753191	-24.9188	4.65775e-137	9.41851e-136
ENSG00000069974	RAB27A	356.551	-0.512088	0.142915	-3.58318	0.000339442	0.000613183
ENSG00000069998	HDHD5	2134.39	0.825614	0.0706445	11.6869	1.48747e-31	7.4526e-31
ENSG00000070010	UFD1	2772.06	0.183053	0.0756475	2.41982	0.0155284	0.0239433
ENSG00000070018	LRP6	2866.39	-1.18927	0.108841	-10.9267	8.59297e-28	3.93272e-27
ENSG00000070019	GUCY2C	0.147426	0.661057	4.08047	0.162005	0.871302
ENSG00000070031	SCT	0
ENSG00000070047	PHRF1	1.15171	-1.58272	3.13233	-0.505284	0.613359	0.675835
ENSG00000070061	ELP1	4139.78	0.45126	0.0664323	6.79278	1.09997e-11	2.97302e-11
ENSG00000070081	NUCB2	1820.03	0.731445	0.0628203	11.6434	2.47813e-31	1.23395e-30
ENSG00000070087	PFN2	5659.91	-0.729161	0.055011	-13.2548	4.23098e-40	2.54256e-39
ENSG00000070159	PTPN3	1585.77	-1.56962	0.0679529	-23.0986	4.78527e-118	8.08272e-117
ENSG00000070182	SPTB	435.109	2.08148	0.130305	15.974	1.94078e-57	1.56911e-56
ENSG00000070190	DAPP1	4.06652	-0.141446	1.25578	-0.112636	0.910319	0.930059
ENSG00000070193	FGF10	0
ENSG00000070214	SLC44A1	2932.76	-0.47354	0.0971418	-4.87474	1.08954e-06	2.30776e-06
ENSG00000070269	TMEM260	551.544	-0.243555	0.125414	-1.94201	0.0521358	0.0748258
ENSG00000070366	SMG6	2221.3	-0.427882	0.0893852	-4.78695	1.69338e-06	3.55029e-06
ENSG00000070367	EXOC5	3350.3	0.0722425	0.1019	0.708952	0.478354	0.548231
ENSG00000070371	CLTCL1	647.367	0.624402	0.118403	5.27354	1.33814e-07	2.97877e-07
ENSG00000070388	FGF22	5.12872	1.54505	1.03005	1.49997	0.133622	0.17886
ENSG00000070404	FSTL3	2950.19	-5.19105	0.115422	-44.9744	0	0
ENSG00000070413	DGCR2	3637.73	1.30229	0.0851968	15.2856	9.53292e-53	7.15566e-52
ENSG00000070423	RNF126	1003.27	0.746955	0.105914	7.05244	1.75803e-12	4.9252e-12
ENSG00000070444	MNT	1186.83	-0.420401	0.0936638	-4.4884	7.17594e-06	1.44775e-05
ENSG00000070476	ZXDC	479.884	0.611646	0.112495	5.43711	5.41529e-08	1.23403e-07
ENSG00000070495	JMJD6	1589.42	-0.481618	0.0633979	-7.59675	3.03653e-14	9.1135e-14
ENSG00000070501	POLB	714.66	0.385612	0.0931215	4.14095	3.45865e-05	6.68996e-05
ENSG00000070526	ST6GALNAC1	4.51047	-2.99463	1.29655	-2.30969	0.0209056	0.0316895
ENSG00000070540	WIPI1	286.197	-1.73701	0.146869	-11.8269	2.83311e-32	1.4373e-31
ENSG00000070601	FRMPD1	45.4114	1.31212	0.405173	3.23842	0.00120195	0.002064
ENSG00000070610	GBA2	1519.03	0.956116	0.0789859	12.1049	9.94845e-34	5.22265e-33
ENSG00000070614	NDST1	4323.66	-0.846881	0.07016	-12.0707	1.50833e-33	7.86712e-33
ENSG00000070669	ASNS	4576.12	-0.399666	0.0784453	-5.09483	3.4905e-07	7.59069e-07
ENSG00000070718	AP3M2	1035.23	0.62853	0.0866595	7.25287	4.08031e-13	1.1734e-12
ENSG00000070729	CNGB1	4.85312	-5.87022	1.60131	-3.6659	0.000246473	0.000449747
ENSG00000070731	ST6GALNAC2	12.06	-0.155494	0.722542	-0.215205	0.829608	0.863568
ENSG00000070748	CHAT	0
ENSG00000070756	PABPC1	31681.2	-1.21675	0.0742406	-16.3893	2.28236e-60	1.93547e-59
ENSG00000070759	TESK2	187.931	4.87863	0.30186	16.1619	9.36547e-59	7.74393e-58
ENSG00000070761	CFAP20	1616.76	0.0844765	0.0696671	1.21257	0.225292	0.287193
ENSG00000070770	CSNK2A2	3529.76	0.055692	0.0576274	0.966414	0.333837	0.404057
ENSG00000070778	PTPN21	592.218	-0.871191	0.110372	-7.89325	2.94417e-15	9.14843e-15
ENSG00000070785	EIF2B3	1361.77	0.849614	0.0795106	10.6855	1.18943e-26	5.26952e-26
ENSG00000070808	CAMK2A	3.76374	-2.10885	1.32733	-1.5888	0.112106	0.152132
ENSG00000070814	TCOF1	10188.9	0.765586	0.0457796	16.7233	8.86742e-63	7.79753e-62
ENSG00000070831	CDC42	7631.97	-0.291991	0.0577696	-5.05441	4.31712e-07	9.3489e-07
ENSG00000070882	OSBPL3	1308.69	0.0775103	0.126424	0.613098	0.539812	0.607047
ENSG00000070886	EPHA8	42.2915	6.83525	1.0749	6.35899	2.0309e-10	5.19492e-10
ENSG00000070915	SLC12A3	1.48604	2.66445	2.04769	1.3012	0.193191	0.24991
ENSG00000070950	RAD18	1324.66	0.172764	0.0745947	2.31604	0.0205562	0.0311854
ENSG00000070961	ATP2B1	6059.49	-1.04142	0.0769673	-13.5306	1.03156e-41	6.40004e-41
ENSG00000070985	TRPM5	0.311376	1.60236	4.03378	0.397234	0.691195
ENSG00000071051	NCK2	916.881	0.38384	0.110528	3.47277	0.000515117	0.000915211
ENSG00000071054	MAP4K4	6331.98	-0.377242	0.0685069	-5.50663	3.65763e-08	8.41345e-08
ENSG00000071073	MGAT4A	593.31	0.930578	0.158707	5.86348	4.53263e-09	1.08791e-08
ENSG00000071082	RPL31	16509.5	0.159193	0.0583437	2.72854	0.00636161	0.0102172
ENSG00000071127	WDR1	10853.5	-1.2035	0.0482234	-24.9568	1.80267e-137	3.66517e-136
ENSG00000071189	SNX13	1406.22	-0.0774873	0.115889	-0.668635	0.503728	0.573276
ENSG00000071203	MS4A12	0
ENSG00000071205	ARHGAP10	605.448	0.34621	0.105332	3.28684	0.0010132	0.00175154
ENSG00000071242	RPS6KA2	366.277	5.53195	0.653411	8.46628	2.53365e-17	8.49261e-17
ENSG00000071243	ING3	743.02	2.70531	0.128442	21.0626	1.75393e-98	2.41172e-97
ENSG00000071246	VASH1	1083.49	1.98084	0.0952489	20.7965	4.65801e-96	6.26116e-95
ENSG00000071282	LMCD1	980.286	-3.79097	0.10978	-34.5324	2.62135e-261	1.17536e-259
ENSG00000071462	BUD23	3820.47	-0.284544	0.0625184	-4.55136	5.33014e-06	1.08324e-05
ENSG00000071537	SEL1L	3651.47	-1.19313	0.0888612	-13.4269	4.20613e-41	2.57514e-40
ENSG00000071539	TRIP13	3128.5	-0.12953	0.0687226	-1.88482	0.0594545	0.0845064
ENSG00000071553	ATP6AP1	7702.41	0.434844	0.0530254	8.20067	2.39056e-16	7.74855e-16
ENSG00000071564	TCF3	2810.12	0.737836	0.0991568	7.44111	9.98464e-14	2.93732e-13
ENSG00000071575	TRIB2	166.209	4.6882	0.323277	14.5021	1.17469e-47	8.12436e-47
ENSG00000071626	DAZAP1	4822.83	0.453672	0.0552523	8.21092	2.19507e-16	7.12612e-16
ENSG00000071655	MBD3	3271.62	0.697112	0.074504	9.3567	8.22641e-21	3.09374e-20
ENSG00000071677	PRLH	0
ENSG00000071794	HLTF	2763.16	0.0580455	0.0808946	0.717546	0.473038	0.54358
ENSG00000071859	FAM50A	3917.24	0.486416	0.064044	7.59503	3.07729e-14	9.23435e-14
ENSG00000071889	FAM3A	1746.48	0.849518	0.097341	8.72724	2.60968e-18	9.03292e-18
ENSG00000071894	CPSF1	2752.14	-0.277592	0.0959994	-2.8916	0.00383286	0.00628528
ENSG00000071909	MYO3B	1.16935	0.0351947	2.01986	0.0174243	0.986098	0.989831
ENSG00000071967	CYBRD1	1365.08	-3.55835	0.102061	-34.865	2.52204e-266	1.13909e-264
ENSG00000071991	CDH19	15.2893	-7.5219	1.3642	-5.51378	3.51216e-08	8.08585e-08
ENSG00000071994	PDCD2	2305.29	0.901535	0.0623095	14.4687	1.91123e-47	1.31401e-46
ENSG00000072041	SLC6A15	2095.75	4.13192	0.127882	32.3103	5.01159e-229	1.95032e-227
ENSG00000072042	RDH11	4572.09	-0.927197	0.0472063	-19.6414	6.84805e-86	8.19602e-85
ENSG00000072062	PRKACA	2775.79	0.740635	0.0826906	8.9567	3.34528e-19	1.19259e-18
ENSG00000072071	ADGRL1	1720.73	3.33875	0.0818306	40.8007	0	0
ENSG00000072080	SPP2	8.66891	0.112422	0.79968	0.140584	0.888199	0.912482
ENSG00000072110	ACTN1	12375.3	-2.41695	0.0454788	-53.1445	0	0
ENSG00000072121	ZFYVE26	1339.07	0.0815291	0.0919391	0.886773	0.375201	0.446752
ENSG00000072133	RPS6KA6	583.075	0.621397	0.176263	3.5254	0.000422849	0.000756928
ENSG00000072134	EPN2	1533.42	-0.969162	0.085517	-11.333	9.0088e-30	4.33351e-29
ENSG00000072135	PTPN18	1004.4	-0.683203	0.0866285	-7.88659	3.10556e-15	9.64022e-15
ENSG00000072163	LIMS2	31.1313	-0.550806	0.484467	-1.13693	0.255567	0.320719
ENSG00000072182	ASIC4	1.2318	2.37727	2.18517	1.08791	0.276633	0.34358
ENSG00000072195	SPEG	161.117	3.08342	0.357838	8.61679	6.88548e-18	2.34998e-17
ENSG00000072201	LNX1	3.37115	-0.0140617	1.46598	-0.009592	0.992347	0.994509
ENSG00000072210	ALDH3A2	6379.43	-1.82362	0.058252	-31.3058	3.89358e-215	1.40071e-213
ENSG00000072274	TFRC	12240.2	-1.83949	0.0652542	-28.1896	7.85214e-175	2.19517e-173
ENSG00000072310	SREBF1	4833.78	-2.94276	0.0963651	-30.5376	8.26183e-205	2.80374e-203
ENSG00000072315	TRPC5	0
ENSG00000072364	AFF4	4054.8	-0.404889	0.114313	-3.54192	0.000397223	0.000713602
ENSG00000072401	UBE2D1	964.256	-0.128739	0.102907	-1.25102	0.210928	0.270759
ENSG00000072415	MPP5	2099.13	-0.294098	0.0740301	-3.97268	7.10692e-05	0.000134701
ENSG00000072422	RHOBTB1	675.926	-0.495467	0.107886	-4.5925	4.37966e-06	8.94879e-06
ENSG00000072501	SMC1A	19507.7	1.42197	0.0915549	15.5313	2.13055e-54	1.64447e-53
ENSG00000072506	HSD17B10	3481.96	-0.369205	0.0794326	-4.64803	3.35117e-06	6.90277e-06
ENSG00000072518	MARK2	2308.67	0.176686	0.0702398	2.51548	0.0118872	0.018568
ENSG00000072571	HMMR	2191.9	-0.0250028	0.0949351	-0.263367	0.792267	0.832212
ENSG00000072609	CHFR	879.382	-0.280755	0.126729	-2.2154	0.0267329	0.0399615
ENSG00000072657	TRHDE	29.7441	4.2405	0.896845	4.72825	2.26468e-06	4.71767e-06
ENSG00000072682	P4HA2	1513.52	-0.808758	0.0669941	-12.0721	1.48345e-33	7.74174e-33
ENSG00000072694	FCGR2B	0.823941	1.28091	2.8643	0.447198	0.654732	0.713627
ENSG00000072736	NFATC3	2357.99	0.616594	0.0881866	6.99193	2.71135e-12	7.52667e-12
ENSG00000072756	TRNT1	963.465	-1.09583	0.0933787	-11.7353	8.40245e-32	4.22238e-31
ENSG00000072778	ACADVL	3597.4	-2.32097	0.0757207	-30.6517	2.50961e-206	8.59517e-205
ENSG00000072786	STK10	1393.4	-0.0473765	0.103208	-0.459039	0.646206	0.70591
ENSG00000072803	FBXW11	2996.72	0.0289967	0.0543998	0.533029	0.594013	0.657563
ENSG00000072818	ACAP1	20.7909	-1.96062	0.92001	-2.13108	0.0330822	0.0489327
ENSG00000072832	CRMP1	79.9805	-1.35083	0.257644	-5.243	1.57985e-07	3.50253e-07
ENSG00000072840	EVC	828.212	0.170408	0.109623	1.5545	0.120065	0.162257
ENSG00000072849	DERL2	1828.48	-1.59024	0.0645408	-24.6394	4.78309e-134	9.29723e-133
ENSG00000072858	SIDT1	119.504	-2.92174	0.320886	-9.10522	8.60883e-20	3.1316e-19
ENSG00000072864	NDE1	682.304	0.189366	0.186669	1.01444	0.310371	0.37939
ENSG00000072952	MRVI1	2.54933	4.06119	1.79341	2.26451	0.023543	0.0354364
ENSG00000072954	TMEM38A	135.553	1.55699	0.224996	6.92005	4.51469e-12	1.23974e-11
ENSG00000072958	AP1M1	2660.17	0.278186	0.0599531	4.64006	3.48313e-06	7.16823e-06
ENSG00000073008	PVR	4886.94	-1.60591	0.0687536	-23.3575	1.15663e-120	1.99912e-119
ENSG00000073050	XRCC1	1945.58	0.277002	0.0599095	4.62368	3.76993e-06	7.73787e-06
ENSG00000073060	SCARB1	5967.95	-1.27017	0.0729696	-17.4068	7.32084e-68	7.0086e-67
ENSG00000073067	CYP2W1	1.86188	0.076516	1.9719	0.0388032	0.969047	0.976146
ENSG00000073111	MCM2	8168.26	0.585353	0.0494676	11.8331	2.6338e-32	1.33765e-31
ENSG00000073146	MOV10L1	2.174	-0.088693	1.57098	-0.056457	0.954978	0.964329
ENSG00000073150	PANX2	229.31	-0.295912	0.183378	-1.61367	0.106599	0.145169
ENSG00000073169	SELENOO	521.316	0.443622	0.128049	3.46447	0.000531284	0.000943288
ENSG00000073282	TP63	71.8471	-7.15954	0.874656	-8.18555	2.71072e-16	8.76641e-16
ENSG00000073331	ALPK1	356.665	-0.770365	0.186151	-4.13838	3.4977e-05	6.76401e-05
ENSG00000073350	LLGL2	1013.04	-1.63213	0.109708	-14.8771	4.64168e-50	3.33708e-49
ENSG00000073417	PDE8A	2743.97	-1.47344	0.0671815	-21.9322	1.28027e-106	1.93847e-105
ENSG00000073464	CLCN4	302.349	-6.92982	0.400096	-17.3204	3.29989e-67	3.1333e-66
ENSG00000073536	NLE1	1860.46	0.308298	0.0873378	3.52995	0.000415643	0.00074489
ENSG00000073578	SDHA	6256.83	-0.034604	0.064189	-0.539095	0.589822	0.654093
ENSG00000073584	SMARCE1	6148.2	0.108317	0.046373	2.33577	0.0195031	0.0296873
ENSG00000073598	FNDC8	0.64192	-0.261207	3.0792	-0.0848294	0.932397	0.946832
ENSG00000073605	GSDMB	40.3957	-0.0400958	0.349734	-0.114647	0.908725	0.928738
ENSG00000073614	KDM5A	2740.98	0.0206871	0.0928658	0.222764	0.82372	0.858787
ENSG00000073670	ADAM11	347.538	1.08899	0.126254	8.62533	6.39066e-18	2.1835e-17
ENSG00000073711	PPP2R3A	268.95	0.465287	0.179309	2.59489	0.00946212	0.0149409
ENSG00000073712	FERMT2	2712.88	0.712812	0.06109	11.6682	1.85278e-31	9.2704e-31
ENSG00000073734	ABCB11	28.9744	-0.258536	0.533426	-0.484672	0.627909	0.689004
ENSG00000073737	DHRS9	16.4996	-4.01466	0.87119	-4.60826	4.06061e-06	8.3127e-06
ENSG00000073754	CD5L	0
ENSG00000073756	PTGS2	1768.61	-6.4175	0.296322	-21.6572	5.20089e-104	7.62591e-103
ENSG00000073792	IGF2BP2	1757.49	2.14033	0.0999823	21.4071	1.14687e-101	1.64143e-100
ENSG00000073803	MAP3K13	787.02	0.402464	0.0914336	4.40171	1.07402e-05	2.14747e-05
ENSG00000073849	ST6GAL1	427.55	0.619886	0.125411	4.94284	7.69915e-07	1.64502e-06
ENSG00000073861	TBX21	3.79149	-0.160988	1.52259	-0.105733	0.915795	0.934265
ENSG00000073905	VDAC1P1	0.313933	-0.317634	4.08047	-0.0778426	0.937953
ENSG00000073910	FRY	120.326	3.9847	0.478713	8.32378	8.52011e-17	2.80772e-16
ENSG00000073921	PICALM	4744.47	-0.410721	0.0647636	-6.34186	2.27013e-10	5.7893e-10
ENSG00000073969	NSF	3456.48	0.0258237	0.0600004	0.430392	0.66691	0.724137
ENSG00000074047	GLI2	1034.09	-0.833414	0.12373	-6.73574	1.63098e-11	4.37386e-11
ENSG00000074054	CLASP1	2330.65	-0.12965	0.105978	-1.22337	0.221191	0.282625
ENSG00000074071	MRPS34	3723.6	0.377994	0.0748287	5.05145	4.38459e-07	9.49168e-07
ENSG00000074181	NOTCH3	1094.93	0.207352	0.124776	1.66179	0.0965549	0.132619
ENSG00000074201	CLNS1A	4136.76	0.451277	0.0505029	8.93567	4.04711e-19	1.43976e-18
ENSG00000074211	PPP2R2C	1353.46	-4.28823	0.121718	-35.231	6.71537e-272	3.07796e-270
ENSG00000074219	TEAD2	940.915	-0.175408	0.111655	-1.57098	0.116187	0.157338
ENSG00000074266	EED	1206.05	0.117185	0.0734281	1.59592	0.110506	0.150054
ENSG00000074276	CDHR2	1.60533	3.01665	2.58259	1.16807	0.242777	0.306555
ENSG00000074317	SNCB	65.4883	2.11532	0.340185	6.21814	5.03094e-10	1.26338e-09
ENSG00000074319	TSG101	2137.02	-0.828432	0.0742108	-11.1632	6.17075e-29	2.91322e-28
ENSG00000074356	NCBP3	2809.25	0.227446	0.0860867	2.64206	0.0082403	0.0130963
ENSG00000074370	ATP2A3	339.192	-1.56687	0.136637	-11.4674	1.92443e-30	9.4033e-30
ENSG00000074410	CA12	19398.3	-6.547	0.0720681	-90.8446	0	0
ENSG00000074416	MGLL	2303.72	-5.50409	0.104361	-52.7412	0	0
ENSG00000074527	NTN4	3471.85	-5.73014	0.0892273	-64.2197	0	0
ENSG00000074582	BCS1L	1338.01	0.558286	0.0716149	7.79566	6.40702e-15	1.97008e-14
ENSG00000074590	NUAK1	1151.87	-1.29793	0.0862762	-15.0439	3.787e-51	2.77201e-50
ENSG00000074603	DPP8	1687.95	-0.399668	0.0971188	-4.11525	3.8676e-05	7.45451e-05
ENSG00000074621	SLC24A1	505.352	0.929641	0.139277	6.67478	2.47599e-11	6.58573e-11
ENSG00000074657	ZNF532	1414.77	-1.97521	0.153028	-12.9075	4.08432e-38	2.35823e-37
ENSG00000074660	SCARF1	0.664518	-3.0151	3.97991	-0.757579	0.448703	0.520059
ENSG00000074695	LMAN1	4154.85	-1.17514	0.0634088	-18.5328	1.12249e-76	1.1989e-75
ENSG00000074696	HACD3	12925.6	-0.233416	0.0428278	-5.45011	5.03376e-08	1.14991e-07
ENSG00000074706	IPCEF1	8.51834	6.38025	1.41721	4.50199	6.73195e-06	1.36024e-05
ENSG00000074755	ZZEF1	2499.04	-0.3187	0.108461	-2.93837	0.00329946	0.00544378
ENSG00000074771	NOX3	0.147426	0.661057	4.08047	0.162005	0.871302
ENSG00000074800	ENO1	87513.7	-1.33939	0.0648127	-20.6655	7.08508e-95	9.38761e-94
ENSG00000074803	SLC12A1	0
ENSG00000074842	MYDGF	2130.2	-0.0937295	0.082782	-1.13224	0.257532	0.322836
ENSG00000074855	ANO8	211.557	0.384505	0.18177	2.11534	0.0344012	0.0507744
ENSG00000074935	TUBE1	456.396	1.28872	0.13211	9.75489	1.75796e-22	6.93875e-22
ENSG00000074964	ARHGEF10L	347.661	-1.97199	0.13621	-14.4775	1.68078e-47	1.159e-46
ENSG00000074966	TXK	9.9072	-0.316568	0.774683	-0.408641	0.682803	0.738758
ENSG00000075035	WSCD2	0.155688	0.661057	4.08047	0.162005	0.871302
ENSG00000075043	KCNQ2	133.318	6.10639	0.491196	12.4317	1.75883e-35	9.58575e-35
ENSG00000075073	TACR2	3.84068	-3.59935	1.60511	-2.24243	0.0249336	0.0373888
ENSG00000075089	ACTR6	1238.19	0.4909	0.081826	5.99931	1.98153e-09	4.84117e-09
ENSG00000075131	TIPIN	1483	0.618468	0.0826788	7.48037	7.41163e-14	2.1894e-13
ENSG00000075142	SRI	2099.56	0.198071	0.0817417	2.42313	0.0153875	0.0237435
ENSG00000075151	EIF4G3	4395.63	0.727182	0.0723417	10.052	8.99908e-24	3.67708e-23
ENSG00000075188	NUP37	1635	-0.528969	0.0656233	-8.06069	7.58641e-16	2.40894e-15
ENSG00000075213	SEMA3A	1084.37	-3.31563	0.10538	-31.4637	2.72801e-217	1.00476e-215
ENSG00000075218	GTSE1	2438.91	1.10789	0.0570908	19.4057	6.91075e-84	8.09875e-83
ENSG00000075223	SEMA3C	3744.17	-3.11848	0.117404	-26.5618	1.8755e-155	4.39027e-154
ENSG00000075234	TTC38	1286.91	1.81859	0.108423	16.7731	3.84062e-63	3.39978e-62
ENSG00000075239	ACAT1	3782.68	0.599409	0.0766558	7.81948	5.30406e-15	1.63445e-14
ENSG00000075240	GRAMD4	709.853	0.777828	0.123717	6.28714	3.23373e-10	8.19491e-10
ENSG00000075275	CELSR1	3135.3	-1.77928	0.0677301	-26.2701	4.21046e-152	9.57827e-151
ENSG00000075290	WNT8B	7.69477	2.5507	1.05535	2.41693	0.0156522	0.0241242
ENSG00000075292	ZNF638	4841.44	0.28017	0.0654609	4.27996	1.86927e-05	3.67654e-05
ENSG00000075303	SLC25A40	664.927	-0.670946	0.146322	-4.58542	4.53077e-06	9.25041e-06
ENSG00000075336	TIMM21	1055.47	-0.201104	0.0871499	-2.30756	0.0210234	0.0318474
ENSG00000075340	ADD2	2994.21	-0.662126	0.0751961	-8.80533	1.30472e-18	4.56112e-18
ENSG00000075388	FGF4	0.332259	-2.025	4.05068	-0.499915	0.617135
ENSG00000075391	RASAL2	1241.86	-0.244629	0.120753	-2.02586	0.0427788	0.0622874
ENSG00000075399	VPS9D1	93.4624	-1.89155	0.380222	-4.97485	6.52979e-07	1.40098e-06
ENSG00000075407	ZNF37A	942.229	0.0139038	0.114281	0.121663	0.903166	0.924175
ENSG00000075413	MARK3	2911.1	0.228815	0.0599671	3.81567	0.000135815	0.000252638
ENSG00000075415	SLC25A3	15932.6	-1.09292	0.0631552	-17.3054	4.2854e-67	4.06489e-66
ENSG00000075420	FNDC3B	3099.61	-2.56917	0.111893	-22.9609	1.14686e-116	1.91967e-115
ENSG00000075426	FOSL2	2904.05	-4.07013	0.110724	-36.7592	8.27416e-296	4.35108e-294
ENSG00000075429	CACNG5	22.6375	1.44441	0.529897	2.72582	0.00641412	0.0102962
ENSG00000075461	CACNG4	276.035	-4.51747	0.2258	-20.0065	4.83551e-89	5.9961e-88
ENSG00000075539	FRYL	1264.2	-0.370706	0.155786	-2.37958	0.0173323	0.0265659
ENSG00000075568	TMEM131	2788.31	0.24538	0.0721	3.40333	0.000665701	0.00117054
ENSG00000075618	FSCN1	4052.07	-1.68444	0.0746178	-22.5742	7.7667e-113	1.25259e-111
ENSG00000075624	ACTB	140634	-1.25137	0.0572709	-21.8501	7.76307e-106	1.16121e-104
ENSG00000075643	MOCOS	899.957	0.343023	0.15405	2.2267	0.0259672	0.038867
ENSG00000075651	PLD1	626.729	-1.72356	0.166777	-10.3345	4.91924e-25	2.08294e-24
ENSG00000075673	ATP12A	11.7571	6.84716	1.36656	5.01052	5.4282e-07	1.16922e-06
ENSG00000075702	WDR62	2470.62	-0.631127	0.0631018	-10.0017	1.49763e-23	6.08593e-23
ENSG00000075711	DLG1	1125.12	-0.654463	0.103004	-6.35375	2.10135e-10	5.36921e-10
ENSG00000075785	RAB7A	6925.8	-0.831264	0.0659682	-12.601	2.08523e-36	1.16171e-35
ENSG00000075790	BCAP29	889.836	-0.495237	0.126903	-3.9025	9.52046e-05	0.000179056
ENSG00000075826	SEC31B	66.3516	2.41647	0.336126	7.18918	6.51824e-13	1.86008e-12
ENSG00000075856	SART3	3838.65	0.148995	0.0612709	2.43174	0.0150266	0.0232139
ENSG00000075884	ARHGAP15	1.91743	2.04704	1.80174	1.13615	0.255895	0.321023
ENSG00000075886	TUBA3D	0.181566	-1.2625	4.08047	-0.309399	0.757018
ENSG00000075891	PAX2	58.9688	3.54238	0.402813	8.7941	1.44196e-18	5.0314e-18
ENSG00000075914	EXOSC7	1330.28	0.295345	0.0750563	3.93498	8.32044e-05	0.000156948
ENSG00000075945	KIFAP3	1160.75	0.959432	0.0784035	12.2371	1.96937e-34	1.0508e-33
ENSG00000075975	MKRN2	1959.6	1.19908	0.0659014	18.1951	5.6434e-74	5.81668e-73
ENSG00000076003	MCM6	7891.63	0.726053	0.0415765	17.4631	2.73868e-68	2.64094e-67
ENSG00000076043	REXO2	1842.55	-0.320009	0.0706479	-4.52963	5.90878e-06	1.19848e-05
ENSG00000076053	RBM7	1056.68	0.0889268	0.113681	0.78225	0.434067	0.50502
ENSG00000076067	RBMS2	2183.19	-2.07715	0.149327	-13.91	5.50799e-44	3.56502e-43
ENSG00000076108	BAZ2A	6442.35	0.486318	0.0996384	4.88083	1.05643e-06	2.2389e-06
ENSG00000076201	PTPN23	2334.08	-0.134486	0.0680647	-1.97585	0.0481717	0.0694803
ENSG00000076242	MLH1	1575.84	-2.70898	0.0912355	-29.6921	9.69805e-194	3.03583e-192
ENSG00000076248	UNG	4281.67	0.27622	0.0593431	4.65463	3.2456e-06	6.69201e-06
ENSG00000076258	FMO4	48.7711	1.00099	0.348144	2.87521	0.00403758	0.00660524
ENSG00000076321	KLHL20	739.749	-0.216215	0.103958	-2.07983	0.0375413	0.0551591
ENSG00000076344	RGS11	29.9495	-5.82996	0.849364	-6.86392	6.69978e-12	1.82706e-11
ENSG00000076351	SLC46A1	1970.5	-0.242222	0.089986	-2.69178	0.00710723	0.0113558
ENSG00000076356	PLXNA2	334.863	0.107019	0.175813	0.608709	0.542717	0.609613
ENSG00000076382	SPAG5	5461.09	-0.00897278	0.0528675	-0.169722	0.865229	0.894179
ENSG00000076513	ANKRD13A	1101.4	1.16583	0.0844847	13.7993	2.5726e-43	1.64617e-42
ENSG00000076554	TPD52	3337.05	-0.894656	0.0953218	-9.38564	6.25344e-21	2.36036e-20
ENSG00000076555	ACACB	580.34	-0.388319	0.116536	-3.33219	0.000861664	0.00149879
ENSG00000076604	TRAF4	2171.87	-0.772692	0.0750666	-10.2934	7.54501e-25	3.17952e-24
ENSG00000076641	PAG1	673.967	4.49855	0.151993	29.5971	1.62666e-192	5.04944e-191
ENSG00000076650	GPATCH1	740.879	-0.919825	0.0923863	-9.95629	2.36726e-23	9.55502e-23
ENSG00000076662	ICAM3	157.545	-0.947257	0.269557	-3.51412	0.000441209	0.000788805
ENSG00000076685	NT5C2	5585.17	-2.40342	0.0543578	-44.2148	0	0
ENSG00000076706	MCAM	671.883	0.733444	0.140594	5.21675	1.82093e-07	4.02021e-07
ENSG00000076716	GPC4	1327.31	9.48872	0.462305	20.5248	1.29339e-93	1.6896e-92
ENSG00000076770	MBNL3	1412.01	11.1239	0.726608	15.3094	6.62026e-53	4.98547e-52
ENSG00000076826	CAMSAP3	489.822	2.15028	0.127884	16.8143	1.91727e-63	1.70452e-62
ENSG00000076864	RAP1GAP	1307.08	-3.87021	0.098867	-39.1456	0	0
ENSG00000076924	XAB2	1581.93	0.0394418	0.0783956	0.503113	0.614885	0.677154
ENSG00000076928	ARHGEF1	2517.19	-1.77098	0.0658954	-26.8756	4.2391e-159	1.01931e-157
ENSG00000076944	STXBP2	1126.89	0.568634	0.0889628	6.39182	1.63928e-10	4.21877e-10
ENSG00000076984	MAP2K7	1263.42	1.03147	0.0810075	12.733	3.87845e-37	2.19834e-36
ENSG00000077009	NMRK2	2.09304	4.35773	2.00141	2.17733	0.0294558	0.0438308
ENSG00000077044	DGKD	3631.17	-2.02583	0.0770927	-26.2779	3.43165e-152	7.81615e-151
ENSG00000077063	CTTNBP2	191.425	3.52938	0.218653	16.1414	1.30497e-58	1.07663e-57
ENSG00000077080	ACTL6B	6.6319	5.09489	1.51157	3.37059	0.000750076	0.00131256
ENSG00000077092	RARB	579.499	-0.0615175	0.0991385	-0.62052	0.534915	0.602224
ENSG00000077097	TOP2B	9222.75	0.831826	0.0565498	14.7096	5.59141e-49	3.94802e-48
ENSG00000077147	TM9SF3	8768.7	-0.66729	0.0874767	-7.62821	2.38044e-14	7.17805e-14
ENSG00000077150	NFKB2	2077.92	-2.63654	0.0832658	-31.6641	4.84643e-220	1.81015e-218
ENSG00000077152	UBE2T	1944.63	-0.428404	0.0762717	-5.61682	1.94508e-08	4.53485e-08
ENSG00000077157	PPP1R12B	568.814	0.391045	0.240703	1.6246	0.104249	0.142219
ENSG00000077232	DNAJC10	6058.1	-0.540838	0.102739	-5.26417	1.4082e-07	3.1306e-07
ENSG00000077235	GTF3C1	8862.18	0.609943	0.0621111	9.82019	9.21652e-23	3.66902e-22
ENSG00000077238	IL4R	682.689	-0.814781	0.115974	-7.02552	2.13269e-12	5.94254e-12
ENSG00000077254	USP33	3447.38	1.67395	0.0850317	19.6861	2.83527e-86	3.41538e-85
ENSG00000077264	PAK3	102.056	3.95404	0.483623	8.17588	2.93719e-16	9.48228e-16
ENSG00000077274	CAPN6	3.59273	5.13786	1.67013	3.07632	0.0020957	0.00352729
ENSG00000077279	DCX	0.155688	0.661057	4.08047	0.162005	0.871302
ENSG00000077312	SNRPA	3712.22	0.0487079	0.0607106	0.802296	0.422382	0.493621
ENSG00000077327	SPAG6	0.884936	3.11802	3.14535	0.991313	0.321533	0.391106
ENSG00000077348	EXOSC5	1566.68	-0.895723	0.0879131	-10.1887	2.22661e-24	9.25909e-24
ENSG00000077380	DYNC1I2	4340.36	-0.326721	0.0476985	-6.84972	7.39959e-12	2.01346e-11
ENSG00000077420	APBB1IP	75.3022	-7.9708	1.05988	-7.52046	5.45825e-14	1.62166e-13
ENSG00000077454	LRCH4	737.905	0.443055	0.0943143	4.69764	2.63188e-06	5.45325e-06
ENSG00000077458	FAM76B	459.511	1.06801	0.164191	6.50467	7.78646e-11	2.02977e-10
ENSG00000077463	SIRT6	525.597	-0.209901	0.125376	-1.67417	0.0940976	0.129541
ENSG00000077498	TYR	0
ENSG00000077514	POLD3	1872.92	0.90595	0.0716831	12.6383	1.29898e-36	7.27387e-36
ENSG00000077522	ACTN2	32.2549	5.86699	1.01913	5.75683	8.57066e-09	2.03163e-08
ENSG00000077549	CAPZB	5209.2	-1.08012	0.0693032	-15.5854	9.15278e-55	7.09111e-54
ENSG00000077585	GPR137B	510.932	-0.746989	0.123033	-6.07146	1.26751e-09	3.12591e-09
ENSG00000077616	NAALAD2	54.6297	9.06439	1.21693	7.44858	9.4353e-14	2.7788e-13
ENSG00000077684	JADE1	2021.5	-0.0545559	0.0702916	-0.776137	0.437668	0.508839
ENSG00000077713	SLC25A43	971.889	-3.11706	0.101108	-30.8289	1.07317e-208	3.70283e-207
ENSG00000077721	UBE2A	4350.15	-0.399712	0.0578082	-6.91444	4.69704e-12	1.28924e-11
ENSG00000077782	FGFR1	3830.37	-0.713785	0.0641247	-11.1312	8.84483e-29	4.16506e-28
ENSG00000077800	FKBP6	0.34604	0.122513	4.08047	0.0300242	0.976048
ENSG00000077935	SMC1B	3.92948	0.58084	1.25339	0.463415	0.643067	0.703038
ENSG00000077942	FBLN1	2072.85	-0.0360752	0.0912317	-0.395424	0.69253	0.747018
ENSG00000077943	ITGA8	179.833	9.85294	1.19001	8.27975	1.23439e-16	4.04553e-16
ENSG00000077984	CST7	0.391338	-2.22892	4.03202	-0.552805	0.580397
ENSG00000078018	MAP2	68.5759	-0.658902	0.347768	-1.89466	0.0581375	0.0828121
ENSG00000078043	PIAS2	671.921	0.334354	0.147863	2.26125	0.023744	0.0357208
ENSG00000078053	AMPH	365.19	6.99597	0.381843	18.3216	5.5668e-75	5.80216e-74
ENSG00000078061	ARAF	2250.19	-0.413665	0.0795101	-5.20268	1.96439e-07	4.32923e-07
ENSG00000078070	MCCC1	513.889	-0.209279	0.104637	-2.00005	0.045495	0.0659166
ENSG00000078081	LAMP3	150.673	-0.991929	0.226389	-4.38153	1.17849e-05	2.34927e-05
ENSG00000078098	FAP	0.634017	-1.60042	3.11083	-0.514468	0.606925	0.670044
ENSG00000078114	NEBL	651.318	-0.528974	0.131016	-4.03748	5.40278e-05	0.000103245
ENSG00000078124	ACER3	1593.86	-1.25738	0.10377	-12.117	8.585e-34	4.51454e-33
ENSG00000078140	UBE2K	3424.61	-0.54241	0.0704648	-7.6976	1.38642e-14	4.22318e-14
ENSG00000078142	PIK3C3	963.323	0.103106	0.101496	1.01586	0.309695	0.378738
ENSG00000078177	N4BP2	750.565	0.689547	0.120254	5.73408	9.8041e-09	2.31573e-08
ENSG00000078237	TIGAR	1524.36	-0.956223	0.100036	-9.55883	1.19094e-21	4.59233e-21
ENSG00000078246	TULP3	1314.77	-0.217162	0.0728048	-2.9828	0.00285623	0.00474284
ENSG00000078269	SYNJ2	2799.95	-2.81991	0.0672617	-41.9244	0	0
ENSG00000078295	ADCY2	10.4229	1.72281	0.732478	2.35203	0.0186712	0.0285028
ENSG00000078304	PPP2R5C	3911.38	-0.0414544	0.0526405	-0.7875	0.430989	0.502037
ENSG00000078319	PMS2P1	364.724	-0.79487	0.126818	-6.2678	3.66193e-10	9.25604e-10
ENSG00000078328	RBFOX1	4.41188	2.78606	1.4488	1.92301	0.0544787	0.0779363
ENSG00000078369	GNB1	9945.89	-0.779737	0.0476461	-16.3652	3.38947e-60	2.85994e-59
ENSG00000078399	HOXA9	1086.89	8.74188	1.07388	8.14044	3.93857e-16	1.26556e-15
ENSG00000078401	EDN1	1631.5	-9.16156	0.338695	-27.0496	3.8626e-161	9.53478e-160
ENSG00000078403	MLLT10	1490.93	-0.127459	0.0717101	-1.77742	0.0754985	0.105573
ENSG00000078487	ZCWPW1	57.3875	-0.708069	0.336644	-2.10332	0.0354381	0.0522384
ENSG00000078549	ADCYAP1R1	105.676	9.13088	1.19734	7.626	2.42148e-14	7.29706e-14
ENSG00000078579	FGF20	0.596506	2.54811	3.01936	0.843922	0.398713
ENSG00000078589	P2RY10	0.303225	1.5688	4.03675	0.38863	0.69755
ENSG00000078596	ITM2A	4.70602	0.368659	0.96895	0.380473	0.703594	0.756097
ENSG00000078618	NRDC	6739.97	-0.128949	0.047241	-2.7296	0.00634116	0.010187
ENSG00000078668	VDAC3	6539.98	-0.251191	0.056433	-4.45113	8.54195e-06	1.71625e-05
ENSG00000078674	PCM1	4583.16	-0.477331	0.0969935	-4.92127	8.59852e-07	1.83179e-06
ENSG00000078687	TNRC6C	477.134	1.39515	0.143325	9.73417	2.15571e-22	8.49064e-22
ENSG00000078699	CBFA2T2	744.278	0.144201	0.103754	1.38983	0.16458	0.216398
ENSG00000078725	BRINP1	5.34932	-6.00861	1.58301	-3.79568	0.000147236	0.000273069
ENSG00000078747	ITCH	2593.63	-0.0981929	0.0747247	-1.31406	0.188826	0.244775
ENSG00000078795	PKD2L2	13.862	0.820434	0.642716	1.27651	0.201775	0.260053
ENSG00000078804	TP53INP2	374.836	0.501354	0.147884	3.39018	0.000698479	0.00122667
ENSG00000078808	SDF4	3630.29	-1.03961	0.0530102	-19.6115	1.23258e-85	1.4714e-84
ENSG00000078814	MYH7B	15.1387	-0.143782	0.553705	-0.259672	0.795116	0.834355
ENSG00000078898	BPIFB2	0
ENSG00000078900	TP73	170.201	5.66743	0.408486	13.8742	9.07608e-44	5.84186e-43
ENSG00000078902	TOLLIP	1621.42	-1.1024	0.0815209	-13.5229	1.14563e-41	7.09825e-41
ENSG00000078967	UBE2D4	515.907	-0.313992	0.11093	-2.83055	0.0046468	0.00755328
ENSG00000079101	CLUL1	7.31679	3.439	1.27395	2.69946	0.00694513	0.0111063
ENSG00000079102	RUNX1T1	164.748	10.6553	1.19236	8.93633	4.02293e-19	1.4317e-18
ENSG00000079112	CDH17	311.536	-9.27506	0.849777	-10.9147	9.80573e-28	4.48113e-27
ENSG00000079134	THOC1	941.472	0.724081	0.0801592	9.03304	1.66972e-19	6.00794e-19
ENSG00000079150	FKBP7	402.724	0.736006	0.116444	6.32068	2.60415e-10	6.62656e-10
ENSG00000079156	OSBPL6	830.014	1.73754	0.131971	13.166	1.37666e-39	8.19859e-39
ENSG00000079215	SLC1A3	703.501	11.0365	1.12833	9.78121	1.35576e-22	5.36722e-22
ENSG00000079246	XRCC5	19507.9	0.220497	0.0392173	5.62246	1.88256e-08	4.3924e-08
ENSG00000079257	LXN	646.685	-2.56623	0.103347	-24.8312	4.12595e-136	8.21781e-135
ENSG00000079263	SP140	4.03998	-4.7465	1.61587	-2.93742	0.00330955	0.00545994
ENSG00000079277	MKNK1	817.52	0.698983	0.109087	6.40758	1.47852e-10	3.80769e-10
ENSG00000079308	TNS1	134.795	0.517012	0.266117	1.94279	0.052041	0.0747186
ENSG00000079313	REXO1	1057.78	0.351255	0.0769337	4.56568	4.97879e-06	1.01417e-05
ENSG00000079332	SAR1A	3590.99	0.0504906	0.0525997	0.959902	0.337104	0.407374
ENSG00000079335	CDC14A	314.314	1.12711	0.164987	6.83155	8.40003e-12	2.28101e-11
ENSG00000079337	RAPGEF3	43.8173	-1.02192	0.343454	-2.97541	0.00292595	0.00485167
ENSG00000079385	CEACAM1	109.952	-6.29216	0.583988	-10.7745	4.54438e-27	2.03811e-26
ENSG00000079387	SENP1	1583.49	0.296642	0.0903265	3.28411	0.00102305	0.00176774
ENSG00000079393	DUSP13	3.02849	-2.34802	1.45551	-1.6132	0.106701	0.145276
ENSG00000079432	CIC	3997.04	-1.38994	0.0553548	-25.1097	3.89896e-139	8.06871e-138
ENSG00000079435	LIPE	183.87	0.878621	0.180541	4.86661	1.13528e-06	2.40134e-06
ENSG00000079459	FDFT1	692.482	-0.0842067	0.138561	-0.607722	0.543372	0.610311
ENSG00000079462	PAFAH1B3	2144.59	-1.46504	0.0979817	-14.9522	1.50768e-50	1.09154e-49
ENSG00000079482	OPHN1	625.629	0.86207	0.222868	3.86807	0.0001097	0.000205424
ENSG00000079557	AFM	0.542332	-2.71259	3.75771	-0.721874	0.470372
ENSG00000079616	KIF22	3847.53	0.166716	0.0551787	3.02139	0.00251619	0.00420344
ENSG00000079689	SCGN	1.01431	-3.59	2.55917	-1.4028	0.160677	0.211731
ENSG00000079691	CARMIL1	1011.91	-0.653943	0.0854867	-7.64965	2.01534e-14	6.09295e-14
ENSG00000079739	PGM1	3489.87	0.839723	0.0568935	14.7596	2.67053e-49	1.89644e-48
ENSG00000079785	DDX1	8001.92	0.10523	0.0454851	2.3135	0.0206951	0.0313859
ENSG00000079805	DNM2	5093.25	0.533969	0.0538883	9.90881	3.81162e-23	1.53117e-22
ENSG00000079819	EPB41L2	4340.06	0.872024	0.0629528	13.852	1.23656e-43	7.9399e-43
ENSG00000079841	RIMS1	8.48622	4.51135	1.19621	3.77136	0.000162359	0.000300276
ENSG00000079931	MOXD1	736.852	3.97304	0.134725	29.4899	3.87827e-191	1.19788e-189
ENSG00000079950	STX7	1190.35	0.210976	0.0938419	2.2482	0.0245633	0.0368638
ENSG00000079974	RABL2B	928.329	0.644245	0.109243	5.89737	3.69337e-09	8.90042e-09
ENSG00000079999	KEAP1	2817.69	-0.539389	0.085743	-6.29077	3.15896e-10	8.00763e-10
ENSG00000080007	DDX43	0
ENSG00000080031	PTPRH	170.014	-7.13067	0.524935	-13.5839	4.98875e-42	3.11595e-41
ENSG00000080166	DCT	8.43066	2.86176	0.938099	3.05059	0.00228389	0.0038298
ENSG00000080189	SLC35C2	1875.93	-0.788275	0.0703733	-11.2013	4.01649e-29	1.90442e-28
ENSG00000080200	CRYBG3	1121.58	-0.313456	0.0998043	-3.14071	0.0016854	0.00286058
ENSG00000080224	EPHA6	135.243	5.10192	0.401721	12.7002	5.90034e-37	3.33115e-36
ENSG00000080293	SCTR	0.364259	-0.759253	4.08047	-0.18607	0.85239
ENSG00000080298	RFX3	234.584	-0.0226949	0.186229	-0.121866	0.903005	0.924149
ENSG00000080345	RIF1	4325.75	0.281499	0.0989944	2.84359	0.0044609	0.00726255
ENSG00000080371	RAB21	2534.04	-0.699789	0.0681569	-10.2673	9.89019e-25	4.15648e-24
ENSG00000080493	SLC4A4	257.689	-0.428755	0.144537	-2.9664	0.00301312	0.00499086
ENSG00000080503	SMARCA2	2165.11	-0.0653798	0.0953737	-0.685512	0.493021	0.563022
ENSG00000080511	RDH8	0
ENSG00000080546	SESN1	929.012	1.35109	0.0818282	16.5113	3.04349e-61	2.62896e-60
ENSG00000080561	MID2	675.407	1.73661	0.0986632	17.6014	2.40481e-69	2.3495e-68
ENSG00000080572	PIH1D3	0.801223	1.14418	2.8778	0.397588	0.690934	0.745599
ENSG00000080573	COL5A3	6.66056	-2.9541	0.999531	-2.95548	0.00312179	0.00516256
ENSG00000080603	SRCAP	7023.87	1.48244	0.129802	11.4207	3.29443e-30	1.60342e-29
ENSG00000080608	PUM3	2521.27	-0.449931	0.057328	-7.84837	4.21469e-15	1.30417e-14
ENSG00000080618	CPB2	0.529526	-2.68312	3.78561	-0.708768	0.478468
ENSG00000080644	CHRNA3	72.6742	0.998866	0.28223	3.5392	0.000401346	0.00072066
ENSG00000080709	KCNN2	30.9728	1.05993	0.396106	2.67587	0.0074535	0.0118917
ENSG00000080802	CNOT4	1153.77	0.554534	0.0908099	6.10653	1.01819e-09	2.52176e-09
ENSG00000080815	PSEN1	2862.31	-1.08391	0.0639015	-16.9622	1.56401e-64	1.42737e-63
ENSG00000080819	CPOX	1686.22	0.540845	0.0867537	6.23425	4.53948e-10	1.14213e-09
ENSG00000080822	CLDND1	1611.9	0.505105	0.0748618	6.74717	1.50761e-11	4.04886e-11
ENSG00000080823	MOK	355.237	-1.07159	0.140198	-7.64338	2.11594e-14	6.39397e-14
ENSG00000080824	HSP90AA1	100164	-0.150236	0.0380153	-3.95198	7.75074e-05	0.000146544
ENSG00000080839	RBL1	1439.89	-0.580489	0.111158	-5.22219	1.76822e-07	3.90646e-07
ENSG00000080845	DLGAP4	1852.99	-1.8462	0.0743134	-24.8434	3.04629e-136	6.08701e-135
ENSG00000080854	IGSF9B	260.258	1.03428	0.194011	5.33102	9.76628e-08	2.19295e-07
ENSG00000080910	CFHR2	8.23396	0.29847	0.757483	0.394028	0.693561	0.747869
ENSG00000080947	CROCCP3	17.5075	-0.329653	0.653116	-0.504739	0.613742	0.676136
ENSG00000080986	NDC80	889.364	1.28329	0.0989371	12.9708	1.79143e-38	1.04442e-37
ENSG00000081014	AP4E1	1129.05	-0.812456	0.130236	-6.23833	4.4226e-10	1.11318e-09
ENSG00000081019	RSBN1	581.406	1.15595	0.10643	10.8612	1.76389e-27	8.00369e-27
ENSG00000081026	MAGI3	1055.46	1.05647	0.0908046	11.6346	2.75029e-31	1.36873e-30
ENSG00000081041	CXCL2	171.819	-6.22416	0.399159	-15.5932	8.10116e-55	6.28161e-54
ENSG00000081051	AFP	8.10606	-4.61305	1.29901	-3.5512	0.000383475	0.000690373
ENSG00000081052	COL4A4	203.812	-3.02376	0.248573	-12.1645	4.80654e-34	2.54489e-33
ENSG00000081059	TCF7	519.128	1.39585	0.115634	12.0713	1.498e-33	7.81544e-33
ENSG00000081087	OSTM1	1349.93	-1.39623	0.103548	-13.4839	1.9454e-41	1.19895e-40
ENSG00000081138	CDH7	59.4391	2.34278	0.330533	7.08789	1.36175e-12	3.8335e-12
ENSG00000081148	IMPG2	6.85601	3.03067	1.18084	2.56653	0.0102721	0.0161607
ENSG00000081154	PCNP	5240.51	0.0138947	0.0583445	0.238149	0.811765	0.848803
ENSG00000081177	EXD2	1519.11	-0.131034	0.0686203	-1.90955	0.056191	0.0802303
ENSG00000081181	ARG2	589.17	4.84939	0.170299	28.4757	2.34347e-178	6.6415e-177
ENSG00000081189	MEF2C	580.089	10.3351	0.839481	12.3113	7.87196e-35	4.24295e-34
ENSG00000081237	PTPRC	2.65702	1.05975	2.33259	0.454324	0.649596	0.70907
ENSG00000081248	CACNA1S	0.958294	-0.246844	2.34154	-0.105419	0.916043	0.934468
ENSG00000081277	PKP1	0.181566	-1.2625	4.08047	-0.309399	0.757018
ENSG00000081307	UBA5	957.238	0.354459	0.0891668	3.97523	7.03101e-05	0.000133289
ENSG00000081320	STK17B	711.433	0.966617	0.105582	9.1551	5.43097e-20	1.98846e-19
ENSG00000081377	CDC14B	1663.59	1.31705	0.117853	11.1754	5.38311e-29	2.54525e-28
ENSG00000081386	ZNF510	462.379	-0.0190132	0.118717	-0.160156	0.872758	0.900507
ENSG00000081479	LRP2	244.027	7.17986	0.566322	12.6781	7.82538e-37	4.4059e-36
ENSG00000081665	ZNF506	49.8118	1.59851	0.410501	3.89405	9.85842e-05	0.000185187
ENSG00000081692	JMJD4	1552.73	0.929587	0.0918385	10.122	4.41396e-24	1.81919e-23
ENSG00000081721	DUSP12	818.316	-0.494962	0.0843141	-5.87046	4.34601e-09	1.04407e-08
ENSG00000081760	AACS	1512.19	-0.865333	0.0664127	-13.0296	8.30032e-39	4.86514e-38
ENSG00000081791	DELE1	1311.77	-0.391721	0.0901978	-4.34291	1.40606e-05	2.78824e-05
ENSG00000081800	SLC13A1	3.79664	0.633648	1.1707	0.541254	0.588333	0.652792
ENSG00000081803	CADPS2	358.143	4.93547	0.223264	22.106	2.77032e-108	4.23953e-107
ENSG00000081818	PCDHB4	1.951	-1.16044	2.0639	-0.562254	0.573943	0.639426
ENSG00000081842	PCDHA6	3.65876	-5.46561	1.67912	-3.25504	0.00113377	0.00195162
ENSG00000081853	PCDHGA2	46.0985	-7.30506	1.08942	-6.70543	2.00812e-11	5.36356e-11
ENSG00000081870	HSPB11	757.948	0.498388	0.101833	4.89418	9.8716e-07	2.09472e-06
ENSG00000081913	PHLPP1	863.164	1.11295	0.111084	10.019	1.25773e-23	5.12224e-23
ENSG00000081923	ATP8B1	994.577	-6.34051	0.211842	-29.9304	7.9255e-197	2.54095e-195
ENSG00000081985	IL12RB2	60.6076	6.98692	0.892045	7.83248	4.78347e-15	1.47722e-14
ENSG00000082014	SMARCD3	411.873	0.879837	0.128183	6.86392	6.69951e-12	1.82706e-11
ENSG00000082068	WDR70	1006.05	0.396492	0.111281	3.56298	0.000366675	0.000660897
ENSG00000082074	FYB1	615.901	-12.0743	1.188	-10.1636	2.88279e-24	1.19529e-23
ENSG00000082126	MPP4	2.53	-0.117755	1.38329	-0.085127	0.93216	0.946695
ENSG00000082146	STRADB	1543.1	0.380497	0.0805123	4.72595	2.2904e-06	4.77018e-06
ENSG00000082153	BZW1	12952.1	-0.430412	0.0586929	-7.33329	2.24578e-13	6.51992e-13
ENSG00000082175	PGR	0.612138	-1.39734	3.76021	-0.371612	0.710182	0.761237
ENSG00000082196	C1QTNF3	8.28661	3.21781	1.01043	3.18458	0.00144963	0.00247443
ENSG00000082212	ME2	2430.43	-0.419594	0.0585567	-7.1656	7.74473e-13	2.20229e-12
ENSG00000082213	C5orf22	1282.68	0.68502	0.0728103	9.40828	5.0432e-21	1.90938e-20
ENSG00000082258	CCNT2	1059.07	0.883779	0.102306	8.6386	5.6904e-18	1.94819e-17
ENSG00000082269	FAM135A	1034.02	0.230333	0.114623	2.00949	0.0444854	0.0645951
ENSG00000082293	COL19A1	10.2304	2.29328	0.930211	2.46533	0.0136887	0.0212621
ENSG00000082397	EPB41L3	2066.68	7.7916	0.392465	19.853	1.03854e-87	1.26832e-86
ENSG00000082438	COBLL1	473.237	0.69362	0.115133	6.02449	1.6964e-09	4.15933e-09
ENSG00000082458	DLG3	1236.08	2.42915	0.0912863	26.6102	5.16851e-156	1.21447e-154
ENSG00000082482	KCNK2	4.94736	5.58908	1.56427	3.57297	0.000352958	0.000636854
ENSG00000082512	TRAF5	365.968	-0.995021	0.141223	-7.04575	1.84465e-12	5.16164e-12
ENSG00000082515	MRPL22	1252.23	-0.0556837	0.0931765	-0.597616	0.550097	0.616968
ENSG00000082516	GEMIN5	2986.63	0.513407	0.0580336	8.84671	9.01338e-19	3.16705e-18
ENSG00000082556	OPRK1	0.847791	-2.27952	2.84838	-0.800288	0.423544	0.494833
ENSG00000082641	NFE2L1	10023.6	-1.064	0.0768006	-13.8541	1.20202e-43	7.72077e-43
ENSG00000082684	SEMA5B	10.0996	0.0619518	0.705395	0.0878256	0.930015	0.945189
ENSG00000082701	GSK3B	2895.87	-1.20061	0.0711959	-16.8635	8.34395e-64	7.48255e-63
ENSG00000082781	ITGB5	12049	-4.78066	0.0704807	-67.8294	0	0
ENSG00000082805	ERC1	2915.71	0.0933771	0.0860491	1.08516	0.27785	0.34493
ENSG00000082898	XPO1	16649.9	-0.0978793	0.0590335	-1.65803	0.0973116	0.13355
ENSG00000082996	RNF13	1491.65	-1.56656	0.0992329	-15.7867	3.84038e-56	3.05045e-55
ENSG00000083067	TRPM3	18.2724	0.88868	0.549802	1.61636	0.106016	0.144417
ENSG00000083093	PALB2	781.19	-0.587672	0.136114	-4.31748	1.57818e-05	3.12289e-05
ENSG00000083097	DOP1A	626.593	1.78494	0.185893	9.60199	7.84143e-22	3.04075e-21
ENSG00000083099	LYRM2	2324.69	0.418101	0.0697066	5.99802	1.99744e-09	4.87811e-09
ENSG00000083123	BCKDHB	484.59	0.839735	0.131578	6.38202	1.74771e-10	4.49096e-10
ENSG00000083168	KAT6A	3246	0.644334	0.119239	5.40373	6.52691e-08	1.48279e-07
ENSG00000083223	TUT7	1020.64	-0.118632	0.0918834	-1.29111	0.196665	0.253856
ENSG00000083290	ULK2	787.203	-1.51993	0.122686	-12.3888	3.00432e-35	1.63163e-34
ENSG00000083307	GRHL2	1.40184	-0.0162307	2.59235	-0.00626101	0.995004	0.996346
ENSG00000083312	TNPO1	13864.3	-0.810632	0.0694741	-11.6681	1.8548e-31	9.27801e-31
ENSG00000083444	PLOD1	4218.26	-1.10137	0.0534942	-20.5886	3.4702e-94	4.54925e-93
ENSG00000083454	P2RX5	167.888	-5.13276	0.920098	-5.57849	2.42617e-08	5.62822e-08
ENSG00000083457	ITGAE	745.385	-0.748979	0.0935864	-8.00307	1.21351e-15	3.82191e-15
ENSG00000083520	DIS3	4974.06	2.06266	0.04986	41.3689	0	0
ENSG00000083535	PIBF1	770.131	1.67126	0.101251	16.506	3.31998e-61	2.86512e-60
ENSG00000083544	TDRD3	528.925	0.990569	0.106725	9.28149	1.67125e-20	6.23334e-20
ENSG00000083635	NUFIP1	837.266	0.866012	0.0947132	9.14352	6.04536e-20	2.20906e-19
ENSG00000083642	PDS5B	1562.35	0.788402	0.0684419	11.5193	1.05469e-30	5.18903e-30
ENSG00000083720	OXCT1	924.849	3.33924	0.200866	16.6242	4.65688e-62	4.0623e-61
ENSG00000083750	RRAGB	387.146	0.0718008	0.120973	0.593528	0.552828	0.619433
ENSG00000083782	EPYC	0
ENSG00000083799	CYLD	1103.53	0.460691	0.0900591	5.11543	3.13026e-07	6.82327e-07
ENSG00000083807	SLC27A5	402.343	-1.24391	0.120948	-10.2846	8.26528e-25	3.48226e-24
ENSG00000083812	ZNF324	450.089	0.422145	0.114623	3.68289	0.000230608	0.000421782
ENSG00000083814	ZNF671	29.3693	-8.47104	1.25756	-6.73611	1.62688e-11	4.36351e-11
ENSG00000083817	ZNF416	170.886	-0.782664	0.179681	-4.35586	1.32547e-05	2.63322e-05
ENSG00000083828	ZNF586	243.266	-0.698697	0.165931	-4.21078	2.54491e-05	4.96283e-05
ENSG00000083838	ZNF446	460.044	-0.536048	0.132736	-4.03844	5.38082e-05	0.000102857
ENSG00000083844	ZNF264	544.22	-0.155088	0.158907	-0.975965	0.329082	0.398951
ENSG00000083845	RPS5	22933	-1.04416	0.0833953	-12.5206	5.75883e-36	3.17685e-35
ENSG00000083857	FAT1	7006.13	-2.35647	0.0825346	-28.5512	2.71142e-179	7.72336e-178
ENSG00000083896	YTHDC1	2895.61	0.493615	0.0685442	7.20142	5.95895e-13	1.70231e-12
ENSG00000083937	CHMP2B	3780.79	-0.44081	0.0505575	-8.71898	2.80719e-18	9.70749e-18
ENSG00000084070	SMAP2	1182.43	1.42019	0.0831899	17.0716	2.41306e-65	2.23076e-64
ENSG00000084072	PPIE	1495.91	0.376933	0.0713751	5.28101	1.28471e-07	2.86326e-07
ENSG00000084073	ZMPSTE24	3861.39	0.0388684	0.0585737	0.663581	0.506959	0.576317
ENSG00000084090	STARD7	9602.68	0.613556	0.0414506	14.8021	1.42003e-49	1.01268e-48
ENSG00000084092	NOA1	1097.86	0.213707	0.0755752	2.82774	0.00468777	0.00761581
ENSG00000084093	REST	1514.71	0.0361541	0.104248	0.34681	0.728734	0.777174
ENSG00000084110	HAL	5.06586	3.6242	1.38061	2.62508	0.00866284	0.0137267
ENSG00000084112	SSH1	2447.52	-1.1476	0.142277	-8.06596	7.26655e-16	2.30895e-15
ENSG00000084207	GSTP1	13201.9	-1.48434	0.0712001	-20.8475	1.60559e-96	2.16602e-95
ENSG00000084234	APLP2	17595.8	0.698034	0.0443571	15.7367	8.47804e-56	6.69408e-55
ENSG00000084444	FAM234B	769.623	1.44864	0.111993	12.9351	2.85409e-38	1.65512e-37
ENSG00000084453	SLCO1A2	87.4505	3.52168	0.362295	9.72048	2.46623e-22	9.70339e-22
ENSG00000084463	WBP11	6381.78	0.458806	0.0586036	7.82897	4.91891e-15	1.51854e-14
ENSG00000084623	EIF3I	12365.6	0.745915	0.0712275	10.4723	1.15809e-25	4.99131e-25
ENSG00000084628	NKAIN1	105.61	1.66389	0.236792	7.02679	2.11334e-12	5.89214e-12
ENSG00000084636	COL16A1	105.712	-4.22247	0.909931	-4.64043	3.47684e-06	7.15607e-06
ENSG00000084652	TXLNA	4380.63	0.507661	0.0497161	10.2112	1.7666e-24	7.35939e-24
ENSG00000084674	APOB	0
ENSG00000084676	NCOA1	1831.6	0.190557	0.0808523	2.35685	0.0184309	0.028159
ENSG00000084693	AGBL5	2802.48	0.855248	0.0543151	15.7461	7.30895e-56	5.77836e-55
ENSG00000084710	EFR3B	1112.15	-1.8259	0.100981	-18.0816	4.45282e-73	4.52918e-72
ENSG00000084731	KIF3C	2759.26	-2.33594	0.0784418	-29.7792	7.25859e-195	2.29152e-193
ENSG00000084733	RAB10	12523.6	-2.21872	0.0554682	-39.9998	0	0
ENSG00000084734	GCKR	1.44584	-4.12883	2.22304	-1.85729	0.0632693	0.0894901
ENSG00000084754	HADHA	9369.29	-0.521067	0.0641145	-8.12713	4.39572e-16	1.40978e-15
ENSG00000084764	MAPRE3	493.44	-0.732301	0.108297	-6.762	1.36103e-11	3.66264e-11
ENSG00000084774	CAD	6349.04	-0.533237	0.0815965	-6.53505	6.35904e-11	1.66281e-10
ENSG00000085063	CD59	7484.37	-1.61558	0.0685039	-23.5837	5.66144e-123	9.98987e-122
ENSG00000085117	CD82	266.05	0.732854	0.175279	4.18108	2.90133e-05	5.64129e-05
ENSG00000085185	BCORL1	1907.15	1.70995	0.107633	15.8868	7.82595e-57	6.28616e-56
ENSG00000085224	ATRX	3341.34	-0.326653	0.0946668	-3.45055	0.000559444	0.000990743
ENSG00000085231	AK6	0
ENSG00000085265	FCN1	3.02558	-0.306227	1.18376	-0.25869	0.795875	0.835009
ENSG00000085274	MYNN	648.239	-0.299037	0.0992964	-3.01156	0.00259908	0.00433718
ENSG00000085276	MECOM	607.701	6.3682	0.256379	24.839	3.39859e-136	6.78366e-135
ENSG00000085365	SCAMP1	2160.32	-0.36715	0.0834997	-4.39702	1.09747e-05	2.19292e-05
ENSG00000085377	PREP	2634.62	0.392404	0.0590343	6.64704	2.99045e-11	7.92571e-11
ENSG00000085382	HACE1	434.369	1.30704	0.159655	8.18664	2.68619e-16	8.6901e-16
ENSG00000085415	SEH1L	1925.88	-0.118733	0.0700612	-1.69471	0.090131	0.124468
ENSG00000085433	WDR47	549.113	0.342637	0.100158	3.42096	0.000624003	0.00110056
ENSG00000085449	WDFY1	2116.81	-0.709798	0.070086	-10.1275	4.1706e-24	1.72042e-23
ENSG00000085465	OVGP1	45.0565	0.447586	0.370613	1.20769	0.227166	0.289264
ENSG00000085491	SLC25A24	2227.46	-0.0869221	0.0734345	-1.18367	0.236544	0.299623
ENSG00000085511	MAP3K4	1451.09	1.46899	0.111578	13.1656	1.38467e-39	8.24363e-39
ENSG00000085514	PILRA	7.97024	-1.00201	0.783479	-1.27892	0.200926	0.259031
ENSG00000085552	IGSF9	35.6506	2.98131	0.47636	6.25851	3.88665e-10	9.81071e-10
ENSG00000085563	ABCB1	241.57	6.00982	0.389063	15.4469	7.91532e-54	6.03913e-53
ENSG00000085644	ZNF213	541.314	-0.1229	0.110465	-1.11256	0.265896	0.331931
ENSG00000085662	AKR1B1	32595.8	-2.5833	0.0588404	-43.9035	0	0
ENSG00000085719	CPNE3	4909.19	-0.170306	0.0532169	-3.20023	0.00137318	0.00234762
ENSG00000085721	RRN3	1682.95	-0.547396	0.165636	-3.30482	0.000950376	0.00164738
ENSG00000085733	CTTN	8834.69	-1.23857	0.0416527	-29.7356	2.66173e-194	8.35789e-193
ENSG00000085741	WNT11	92.3685	4.07278	0.379929	10.7199	8.21245e-27	3.65933e-26
ENSG00000085760	MTIF2	2545.21	-0.367316	0.0610552	-6.01612	1.78647e-09	4.3744e-09
ENSG00000085788	DDHD2	1548.57	0.105514	0.100417	1.05076	0.29337	0.361489
ENSG00000085831	TTC39A	160.183	-0.101005	0.206812	-0.488388	0.625275	0.686601
ENSG00000085832	EPS15	1804.28	0.579838	0.0762743	7.60202	2.91552e-14	8.76024e-14
ENSG00000085840	ORC1	1673.43	0.382062	0.0650033	5.87758	4.16312e-09	1.00142e-08
ENSG00000085871	MGST2	928.253	-1.08125	0.0948243	-11.4027	4.05488e-30	1.96632e-29
ENSG00000085872	CHERP	3146.59	1.2504	0.061618	20.2928	1.48936e-91	1.91329e-90
ENSG00000085978	ATG16L1	1692.29	-1.14833	0.0777228	-14.7747	2.13445e-49	1.51692e-48
ENSG00000085982	USP40	1644.05	-1.47964	0.0882221	-16.7717	3.92885e-63	3.47623e-62
ENSG00000085998	POMGNT1	2430.24	-0.303567	0.0707111	-4.29306	1.76227e-05	3.47197e-05
ENSG00000085999	RAD54L	1484.97	2.24121	0.0815966	27.4669	4.36226e-166	1.12781e-164
ENSG00000086015	MAST2	2393.02	-0.450456	0.076427	-5.89394	3.77087e-09	9.08485e-09
ENSG00000086061	DNAJA1	19479.8	-0.0321568	0.0388485	-0.827747	0.407814	0.479039
ENSG00000086062	B4GALT1	6483.48	-2.6734	0.049237	-54.2966	0	0
ENSG00000086065	CHMP5	3094.07	-0.649239	0.0594686	-10.9173	9.52387e-28	4.3534e-27
ENSG00000086102	NFX1	2434.52	0.264088	0.0542098	4.87159	1.10705e-06	2.34404e-06
ENSG00000086159	AQP6	10.8062	1.59351	0.690365	2.30822	0.0209871	0.0317949
ENSG00000086189	DIMT1	1224.28	0.0784879	0.0826215	0.94997	0.342127	0.412711
ENSG00000086200	IPO11	2263.32	0.150244	0.058619	2.56306	0.0103755	0.0163096
ENSG00000086205	FOLH1	9.01419	1.97577	0.909586	2.17217	0.0298432	0.0443822
ENSG00000086232	EIF2AK1	7674.17	-0.151898	0.0457841	-3.31771	0.000907597	0.00157571
ENSG00000086288	NME8	0.16613	-1.2625	4.08047	-0.309399	0.757018
ENSG00000086289	EPDR1	3339.23	-5.39138	0.136644	-39.4557	0	0
ENSG00000086300	SNX10	360.76	0.644476	0.125372	5.14051	2.73996e-07	5.99151e-07
ENSG00000086475	SEPHS1	3400.93	0.0296837	0.0582082	0.509958	0.610081	0.672862
ENSG00000086504	MRPL28	3510.83	0.245718	0.0760984	3.22895	0.00124247	0.00213003
ENSG00000086506	HBQ1	27.3333	0.561424	0.441241	1.27237	0.20324	0.261733
ENSG00000086544	ITPKC	612.079	-1.12841	0.102943	-10.9614	5.85642e-28	2.68825e-27
ENSG00000086548	CEACAM6	3171.08	-15.2237	1.17934	-12.9087	4.0207e-38	2.32295e-37
ENSG00000086570	FAT2	0.59123	2.53602	3.66166	0.69259	0.488567
ENSG00000086589	RBM22	3008.37	0.307161	0.0534605	5.74557	9.16104e-09	2.1677e-08
ENSG00000086598	TMED2	11896.2	-0.147945	0.0387566	-3.81729	0.000134924	0.000251112
ENSG00000086619	ERO1B	575.921	0.981534	0.101845	9.63752	5.55155e-22	2.16272e-21
ENSG00000086666	ZFAND6	3026.91	-1.35677	0.0644441	-21.0535	2.12488e-98	2.911e-97
ENSG00000086696	HSD17B2	5.54979	-2.98389	1.15583	-2.5816	0.00983437	0.015501
ENSG00000086712	TXLNG	3357.24	1.76055	0.0770403	22.8523	1.38539e-115	2.28392e-114
ENSG00000086717	PPEF1	33.7334	-2.86486	0.492651	-5.81521	6.0559e-09	1.4453e-08
ENSG00000086730	LAT2	39.2812	-1.45683	0.389371	-3.7415	0.000182927	0.00033684
ENSG00000086758	HUWE1	13634.7	-0.059535	0.0693584	-0.858368	0.390689	0.462199
ENSG00000086827	ZW10	1630.13	1.20247	0.0692235	17.3708	1.37387e-67	1.3092e-66
ENSG00000086848	ALG9	904.461	-0.0333965	0.0894196	-0.373481	0.708791	0.760097
ENSG00000086967	MYBPC2	2.40624	3.49465	1.7835	1.95944	0.0500616	0.0720125
ENSG00000086991	NOX4	5.5698	3.41002	1.10368	3.08968	0.00200372	0.0033783
ENSG00000087008	ACOX3	305.442	-0.0281442	0.127547	-0.220658	0.825359	0.8604
ENSG00000087053	MTMR2	2067.14	0.0648385	0.0715319	0.906427	0.36471	0.435461
ENSG00000087074	PPP1R15A	1934.54	-1.86899	0.0893369	-20.9206	3.47473e-97	4.71502e-96
ENSG00000087076	HSD17B14	254.771	-3.49549	0.202937	-17.2245	1.74037e-66	1.63743e-65
ENSG00000087077	TRIP6	2276.29	-0.108165	0.0756108	-1.43054	0.152561	0.201867
ENSG00000087085	ACHE	19.6698	0.246375	0.491787	0.500979	0.616386	0.678525
ENSG00000087086	FTL	229816	-6.28129	0.0651439	-96.4218	0	0
ENSG00000087087	SRRT	6498.66	0.958186	0.060808	15.7576	6.09263e-56	4.8291e-55
ENSG00000087088	BAX	5686.51	-1.17316	0.0955171	-12.2822	1.12892e-34	6.06193e-34
ENSG00000087095	NLK	796.543	-0.42838	0.085329	-5.02033	5.15824e-07	1.11236e-06
ENSG00000087111	PIGS	3933.34	0.130712	0.0622595	2.09947	0.0357751	0.0526849
ENSG00000087116	ADAMTS2	72.6059	6.70267	0.875447	7.65628	1.914e-14	5.7979e-14
ENSG00000087128	TMPRSS11E	0
ENSG00000087152	ATXN7L3	2934.45	-0.445581	0.0658309	-6.76857	1.30062e-11	3.50311e-11
ENSG00000087157	PGS1	802.082	-0.00840942	0.0947972	-0.0887096	0.929313	0.944578
ENSG00000087191	PSMC5	6989.55	-0.659079	0.0615968	-10.6999	1.01886e-26	4.52464e-26
ENSG00000087206	UIMC1	1514.24	0.447496	0.0747686	5.98508	2.16288e-09	5.27243e-09
ENSG00000087237	CETP	0.155688	0.661057	4.08047	0.162005	0.871302
ENSG00000087245	MMP2	166.851	-0.73936	0.172814	-4.27835	1.88281e-05	3.70239e-05
ENSG00000087250	MT3	0.375833	-2.17672	4.03654	-0.539254	0.589712
ENSG00000087253	LPCAT2	719.272	0.168236	0.132342	1.27122	0.20365	0.262197
ENSG00000087258	GNAO1	47.6037	3.91429	0.479818	8.15786	3.4101e-16	1.09841e-15
ENSG00000087263	OGFOD1	3131.31	-0.116031	0.0533625	-2.1744	0.0296754	0.0441539
ENSG00000087266	SH3BP2	530.189	1.91363	0.155947	12.271	1.29607e-34	6.9454e-34
ENSG00000087269	NOP14	4170.02	1.10385	0.0490155	22.5203	2.62339e-112	4.1981e-111
ENSG00000087274	ADD1	5204.41	0.375878	0.0575845	6.52742	6.69134e-11	1.74847e-10
ENSG00000087299	L2HGDH	1263.6	-0.125029	0.0912879	-1.36961	0.170808	0.223888
ENSG00000087301	TXNDC16	728.536	2.8404	0.111195	25.5443	6.35325e-144	1.37134e-142
ENSG00000087302	RTRAF	5387.93	-0.0143284	0.0588964	-0.243281	0.807788	0.845311
ENSG00000087303	NID2	898.809	1.33817	0.0908135	14.7354	3.82207e-49	2.70695e-48
ENSG00000087338	GMCL1	1483.59	0.608352	0.0679375	8.95458	3.41017e-19	1.21526e-18
ENSG00000087365	SF3B2	14255.4	0.343349	0.0569121	6.03297	1.60969e-09	3.95091e-09
ENSG00000087448	KLHL42	1422.29	-0.183775	0.108283	-1.69718	0.0896629	0.123868
ENSG00000087460	GNAS	27683.4	0.603759	0.0558139	10.8174	2.84873e-27	1.2857e-26
ENSG00000087470	DNM1L	4687.38	0.436719	0.07996	5.46173	4.7153e-08	1.07955e-07
ENSG00000087494	PTHLH	160.194	-3.35099	0.232742	-14.3979	5.33513e-47	3.64639e-46
ENSG00000087495	PHACTR3	80.9462	9.63147	1.2043	7.99755	1.2692e-15	3.99257e-15
ENSG00000087502	ERGIC2	2080.27	-0.54851	0.0574544	-9.54688	1.33664e-21	5.14239e-21
ENSG00000087510	TFAP2C	735.524	-2.42027	0.117528	-20.5931	3.16136e-94	4.15024e-93
ENSG00000087586	AURKA	4058.46	-0.352605	0.0587442	-6.00239	1.94435e-09	4.75346e-09
ENSG00000087589	CASS4	6.50665	1.83079	0.984414	1.85977	0.0629175	0.0890332
ENSG00000087842	PIR	1396.25	-2.21739	0.0733739	-30.2205	1.27598e-200	4.19966e-199
ENSG00000087884	AAMDC	404.942	1.12983	0.137462	8.21921	2.0484e-16	6.65345e-16
ENSG00000087903	RFX2	222.917	-0.0736779	0.194822	-0.378181	0.705296	0.757356
ENSG00000087995	METTL2A	1490.66	-0.326131	0.085563	-3.81158	0.000138079	0.000256675
ENSG00000088002	SULT2B1	114.758	-3.35391	0.264564	-12.6771	7.91616e-37	4.45431e-36
ENSG00000088035	ALG6	1063.75	1.63093	0.0834477	19.5444	4.60642e-85	5.47433e-84
ENSG00000088038	CNOT3	3334.66	0.654024	0.0506753	12.9062	4.15475e-38	2.39815e-37
ENSG00000088053	GP6	3.14205	3.02018	2.0064	1.50527	0.132254	0.177156
ENSG00000088179	PTPN4	819.464	-0.217977	0.177976	-1.22476	0.220667	0.282033
ENSG00000088205	DDX18	6338.31	0.277654	0.0518674	5.35314	8.64421e-08	1.94949e-07
ENSG00000088247	KHSRP	14772.4	1.55764	0.0372989	41.7611	0	0
ENSG00000088256	GNA11	2850.19	0.119818	0.0587289	2.04019	0.0413315	0.0603125
ENSG00000088280	ASAP3	265.583	0.0158411	0.169282	0.0935779	0.925445	0.941471
ENSG00000088298	EDEM2	1451.53	-1.94675	0.0838191	-23.2256	2.50899e-119	4.29257e-118
ENSG00000088305	DNMT3B	910.425	1.49723	0.0952798	15.714	1.21226e-55	9.5393e-55
ENSG00000088320	REM1	0.752801	2.88219	2.81662	1.02328	0.306175	0.375025
ENSG00000088325	TPX2	8416.95	-0.0614156	0.0451039	-1.36165	0.173309	0.226894
ENSG00000088340	FER1L4	20.4778	-1.36252	0.546329	-2.49396	0.0126327	0.0196861
ENSG00000088356	PDRG1	1030.33	0.303589	0.0907222	3.34636	0.000818806	0.00142718
ENSG00000088367	EPB41L1	4919.13	-2.26416	0.0746895	-30.3143	7.4307e-202	2.46314e-200
ENSG00000088386	SLC15A1	4.50376	0.662221	1.01574	0.651957	0.514429	0.583558
ENSG00000088387	DOCK9	1341.64	-0.624303	0.123658	-5.04864	4.44957e-07	9.62898e-07
ENSG00000088448	ANKRD10	649.403	0.274481	0.386157	0.710802	0.477207	0.547084
ENSG00000088451	TGDS	752.949	1.73617	0.0992062	17.5006	1.41644e-68	1.37159e-67
ENSG00000088538	DOCK3	400.955	2.99146	0.146004	20.4889	2.70491e-93	3.51866e-92
ENSG00000088543	C3orf18	152.97	0.207966	0.195978	1.06117	0.288614	0.356433
ENSG00000088682	COQ9	1897.51	-0.447219	0.0600544	-7.4469	9.55567e-14	2.81246e-13
ENSG00000088726	TMEM40	2.65562	-4.30025	1.8146	-2.36981	0.0177971	0.0272454
ENSG00000088727	KIF9	187.764	-0.600037	0.163972	-3.65939	0.000252812	0.000460862
ENSG00000088756	ARHGAP28	134.924	4.4003	0.332041	13.2523	4.37619e-40	2.62897e-39
ENSG00000088766	CRLS1	1399.26	-0.640655	0.0734606	-8.72106	2.75608e-18	9.53252e-18
ENSG00000088782	DEFB127	0
ENSG00000088808	PPP1R13B	591.459	1.10291	0.126057	8.74932	2.14641e-18	7.45301e-18
ENSG00000088812	ATRN	3071.34	-1.45457	0.0726463	-20.0227	3.49373e-89	4.34097e-88
ENSG00000088826	SMOX	2613.41	-3.83967	0.0865649	-44.356	0	0
ENSG00000088827	SIGLEC1	0.755953	-1.87918	2.9191	-0.643752	0.519736	0.588356
ENSG00000088832	FKBP1A	11976.1	-0.679955	0.0684152	-9.93866	2.82609e-23	1.13872e-22
ENSG00000088833	NSFL1C	3947.6	-1.00662	0.068022	-14.7985	1.49829e-49	1.06726e-48
ENSG00000088836	SLC4A11	298.537	-0.90875	0.179993	-5.0488	4.44601e-07	9.62239e-07
ENSG00000088854	C20orf194	386.026	-0.00910334	0.136178	-0.0668489	0.946702	0.957639
ENSG00000088876	ZNF343	687.754	-0.214659	0.0975923	-2.19955	0.0278391	0.0415249
ENSG00000088881	EBF4	103.178	1.63214	0.2814	5.8001	6.62773e-09	1.57954e-08
ENSG00000088882	CPXM1	0
ENSG00000088888	MAVS	4991.24	-0.792566	0.0772888	-10.2546	1.12836e-24	4.73566e-24
ENSG00000088899	LZTS3	450.757	0.000687499	0.109201	0.0062957	0.994977	0.996346
ENSG00000088926	F11	0
ENSG00000088930	XRN2	7509.21	-0.604011	0.0470448	-12.8391	9.90488e-38	5.67657e-37
ENSG00000088970	KIZ	397.148	1.28607	0.125889	10.2159	1.68252e-24	7.0154e-24
ENSG00000088986	DYNLL1	9077.22	-0.0583861	0.0637445	-0.91594	0.359699	0.43028
ENSG00000088992	TESC	1027.45	-3.34821	0.107635	-31.1072	1.92738e-212	6.8019e-211
ENSG00000089006	SNX5	6174.27	-0.752089	0.0507399	-14.8224	1.04933e-49	7.5005e-49
ENSG00000089009	RPL6	47163.7	0.130166	0.0529806	2.45685	0.0140159	0.0217449
ENSG00000089012	SIRPG	0
ENSG00000089022	MAPKAPK5	1432.59	-0.333922	0.0711442	-4.69359	2.6845e-06	5.55792e-06
ENSG00000089041	P2RX7	6.53342	0.292696	0.967378	0.302566	0.76222	0.805803
ENSG00000089048	ESF1	1697.99	-0.306363	0.0708035	-4.32695	1.51187e-05	2.99519e-05
ENSG00000089050	RBBP9	1314.74	-0.862819	0.0949362	-9.0884	1.00503e-19	3.65024e-19
ENSG00000089053	ANAPC5	5136.71	-0.0105527	0.0525211	-0.200922	0.840759	0.872827
ENSG00000089057	SLC23A2	2939.12	-0.131527	0.087772	-1.49851	0.134001	0.179341
ENSG00000089060	SLC8B1	407.124	-0.282018	0.131786	-2.13997	0.0323574	0.047937
ENSG00000089063	TMEM230	4347.7	-0.592759	0.0607216	-9.76191	1.64035e-22	6.48145e-22
ENSG00000089091	DZANK1	127.703	-1.06878	0.274431	-3.89453	9.83907e-05	0.000184842
ENSG00000089094	KDM2B	2124.33	1.10151	0.0673836	16.3469	4.57704e-60	3.85148e-59
ENSG00000089101	CFAP61	10.8014	-1.56979	0.742685	-2.11367	0.0345435	0.0509722
ENSG00000089116	LHX5	0.147548	0.661057	4.08047	0.162005	0.871302
ENSG00000089123	TASP1	344.336	-0.542658	0.157323	-3.44933	0.000561974	0.000994749
ENSG00000089127	OAS1	4625.79	-8.43446	0.16355	-51.5713	0	0
ENSG00000089154	GCN1	10401.8	-0.0380513	0.0665975	-0.571363	0.567753	0.633747
ENSG00000089157	RPLP0	72604.6	-0.332318	0.0763004	-4.35539	1.32828e-05	2.63851e-05
ENSG00000089159	PXN	5484.03	-1.7933	0.0499019	-35.9366	8.2061e-283	4.01926e-281
ENSG00000089163	SIRT4	26.066	-0.107213	0.498057	-0.215261	0.829564	0.863568
ENSG00000089169	RPH3A	12.6218	-4.24386	0.899509	-4.71797	2.38207e-06	4.95389e-06
ENSG00000089177	KIF16B	1245.49	-1.41862	0.0893251	-15.8816	8.50265e-57	6.82086e-56
ENSG00000089195	TRMT6	1784.22	-0.00546188	0.0693688	-0.0787368	0.937242	0.950089
ENSG00000089199	CHGB	193.822	-3.48686	0.20588	-16.9364	2.42405e-64	2.19929e-63
ENSG00000089220	PEBP1	11265.3	0.259054	0.056819	4.55928	5.13293e-06	1.04419e-05
ENSG00000089225	TBX5	0.147548	0.661057	4.08047	0.162005	0.871302
ENSG00000089234	BRAP	1141.01	-0.182254	0.0910629	-2.00141	0.0453485	0.0657352
ENSG00000089248	ERP29	6782.63	-0.741076	0.0508352	-14.578	3.87637e-48	2.70008e-47
ENSG00000089250	NOS1	21.9942	-6.70225	1.28513	-5.21524	1.8358e-07	4.05158e-07
ENSG00000089280	FUS	20144.9	0.699295	0.0527434	13.2584	4.03205e-40	2.42459e-39
ENSG00000089289	IGBP1	1740.57	-0.634111	0.0722197	-8.78031	1.6303e-18	5.68218e-18
ENSG00000089327	FXYD5	2823.61	-2.47564	0.0913183	-27.11	7.50376e-162	1.86719e-160
ENSG00000089335	ZNF302	996.018	-0.0109451	0.0834578	-0.131146	0.89566	0.9186
ENSG00000089351	GRAMD1A	3287.1	-1.6915	0.056502	-29.937	6.49033e-197	2.08443e-195
ENSG00000089356	FXYD3	0.830057	-1.75749	2.87916	-0.610418	0.541585	0.608525
ENSG00000089472	HEPH	0.430658	1.6651	4.0192	0.414287	0.678664
ENSG00000089486	CDIP1	608.494	2.27763	0.156033	14.5971	2.93132e-48	2.04564e-47
ENSG00000089505	CMTM1	37.481	-0.588771	0.422968	-1.392	0.163923	0.215671
ENSG00000089558	KCNH4	15.6974	0.499426	0.547694	0.91187	0.361837	0.432532
ENSG00000089597	GANAB	22188.3	0.0948823	0.0405651	2.33901	0.0193348	0.0294477
ENSG00000089639	GMIP	201.254	-0.0177907	0.202902	-0.0876811	0.93013	0.945202
ENSG00000089682	RBM41	842.821	1.15669	0.104184	11.1024	1.22079e-28	5.72985e-28
ENSG00000089685	BIRC5	6631.18	0.146292	0.0628099	2.32912	0.0198527	0.0301946
ENSG00000089692	LAG3	4.58105	-1.833	1.30946	-1.39981	0.161569	0.212755
ENSG00000089693	MLF2	8422.47	-0.717982	0.0678843	-10.5765	3.82812e-26	1.67046e-25
ENSG00000089723	OTUB2	212.726	0.517236	0.190649	2.71303	0.00666713	0.0106802
ENSG00000089737	DDX24	849.181	1.9193	0.57051	3.36419	0.000767694	0.00134213
ENSG00000089775	ZBTB25	331.149	-0.839537	0.165211	-5.0816	3.74275e-07	8.13259e-07
ENSG00000089818	NECAP1	1375.25	0.605939	0.0861026	7.03741	1.95848e-12	5.47024e-12
ENSG00000089820	ARHGAP4	22.4851	0.614327	0.625702	0.98182	0.326188	0.395832
ENSG00000089847	ANKRD24	20.2265	0.953891	0.504304	1.8915	0.0585574	0.0833462
ENSG00000089876	DHX32	1533.98	-0.901667	0.0765611	-11.7771	5.123e-32	2.587e-31
ENSG00000089902	RCOR1	2041.18	-0.238507	0.0955181	-2.49698	0.0125257	0.0195227
ENSG00000089916	GPATCH2L	1093.92	-0.0806302	0.135752	-0.593954	0.552543	0.619226
ENSG00000090006	LTBP4	821.471	0.667866	0.107452	6.2155	5.11612e-10	1.28443e-09
ENSG00000090013	BLVRB	4399.71	-3.93425	0.071093	-55.3394	0	0
ENSG00000090020	SLC9A1	799.107	-0.158104	0.0848007	-1.86442	0.062263	0.0881608
ENSG00000090054	SPTLC1	3088.7	-0.371646	0.0538929	-6.896	5.34866e-12	1.46463e-11
ENSG00000090060	PAPOLA	10641.6	-0.0292559	0.0518767	-0.56395	0.572788	0.638407
ENSG00000090061	CCNK	2773.62	-0.075596	0.0598577	-1.26293	0.206615	0.265707
ENSG00000090097	PCBP4	382.219	-0.747924	0.118986	-6.28582	3.26133e-10	8.26148e-10
ENSG00000090104	RGS1	0
ENSG00000090238	YPEL3	131.408	0.0672949	0.196047	0.343258	0.731404	0.779395
ENSG00000090263	MRPS33	1921.08	-0.411601	0.082771	-4.97277	6.60045e-07	1.41565e-06
ENSG00000090266	NDUFB2	2377.85	-0.679303	0.0977518	-6.94926	3.67199e-12	1.01313e-11
ENSG00000090273	NUDC	5448.91	-0.372744	0.0755616	-4.93298	8.09853e-07	1.72876e-06
ENSG00000090316	MAEA	2142.79	0.289065	0.0654143	4.41899	9.91641e-06	1.98574e-05
ENSG00000090339	ICAM1	25.5195	-0.487763	0.489216	-0.997029	0.318751	0.388419
ENSG00000090372	STRN4	4116.05	0.0763521	0.0636424	1.1997	0.230254	0.292794
ENSG00000090376	IRAK3	10.2774	-0.7749	0.740883	-1.04591	0.295601	0.363827
ENSG00000090382	LYZ	14.5927	-0.270756	0.597299	-0.4533	0.650333	0.70975
ENSG00000090402	SI	0
ENSG00000090432	MUL1	1421.17	-0.958565	0.0841419	-11.3922	4.57081e-30	2.21477e-29
ENSG00000090447	TFAP4	848.833	0.602076	0.108357	5.55643	2.75344e-08	6.36832e-08
ENSG00000090470	PDCD7	907.854	-0.62417	0.0875145	-7.13219	9.8787e-13	2.79711e-12
ENSG00000090487	SPG21	3597.24	-1.71315	0.0606768	-28.2341	2.23073e-175	6.24571e-174
ENSG00000090512	FETUB	3.2737	-5.29453	1.76254	-3.00392	0.00266524	0.00444279
ENSG00000090520	DNAJB11	2251.82	-0.188433	0.0583058	-3.23181	0.00123008	0.00211015
ENSG00000090530	P3H2	818.081	-4.79919	0.139222	-34.4715	2.14626e-260	9.57717e-259
ENSG00000090534	THPO	3.01939	3.80706	1.68799	2.25537	0.0241098	0.0362301
ENSG00000090539	CHRD	34.5082	3.92368	0.581171	6.75134	1.46484e-11	3.938e-11
ENSG00000090554	FLT3LG	45.1878	-1.14349	0.368896	-3.09977	0.00193671	0.00327156
ENSG00000090565	RAB11FIP3	1119.22	0.239258	0.0796698	3.00312	0.00267224	0.00445406
ENSG00000090581	GNPTG	513.369	-0.598651	0.122242	-4.89727	9.71764e-07	2.06276e-06
ENSG00000090612	ZNF268	872.248	0.0478062	0.139869	0.341793	0.732506	0.780435
ENSG00000090615	GOLGA3	2609.12	0.227697	0.112639	2.02147	0.0432307	0.0629109
ENSG00000090621	PABPC4	6175.27	0.592952	0.0749144	7.91507	2.4712e-15	7.70067e-15
ENSG00000090659	CD209	1.25232	1.27204	2.56566	0.495793	0.62004	0.681941
ENSG00000090661	CERS4	251.464	1.49314	0.155397	9.60853	7.35904e-22	2.85667e-21
ENSG00000090674	MCOLN1	476.19	-0.170766	0.109677	-1.55699	0.119473	0.161516
ENSG00000090686	USP48	1767.49	0.527722	0.0710198	7.43063	1.0808e-13	3.175e-13
ENSG00000090776	EFNB1	794.146	1.40794	0.0893908	15.7504	6.82449e-56	5.39995e-55
ENSG00000090857	PDPR	2281.86	-0.521291	0.0916985	-5.68484	1.30938e-08	3.07671e-08
ENSG00000090861	AARS1	13560.3	-1.33899	0.0544913	-24.5726	2.478e-133	4.78659e-132
ENSG00000090863	GLG1	5969.54	-0.598217	0.0628033	-9.52524	1.64653e-21	6.31891e-21
ENSG00000090889	KIF4A	3631.45	0.425983	0.0660285	6.45151	1.10742e-10	2.86429e-10
ENSG00000090905	TNRC6A	3184.66	0.118948	0.105575	1.12667	0.259883	0.325301
ENSG00000090924	PLEKHG2	1455.38	-0.639969	0.175216	-3.65247	0.000259732	0.000472888
ENSG00000090932	DLL3	224.956	-1.02181	0.170788	-5.98291	2.19187e-09	5.34029e-09
ENSG00000090971	NAT14	857.846	0.131078	0.0906912	1.44532	0.148369	0.196797
ENSG00000090975	PITPNM2	594.531	-1.85306	0.127994	-14.4777	1.67595e-47	1.1561e-46
ENSG00000090989	EXOC1	1171.87	0.194369	0.124111	1.56609	0.117327	0.158743
ENSG00000091009	RBM27	2229.48	0.147652	0.0752913	1.96107	0.0498704	0.0717743
ENSG00000091010	POU4F3	2.82928	1.11298	1.33393	0.834362	0.404077	0.475191
ENSG00000091039	OSBPL8	2865.41	0.453931	0.0907828	5.00019	5.72742e-07	1.23267e-06
ENSG00000091073	DTX2	1232.09	-2.33778	0.10706	-21.8362	1.0516e-105	1.57046e-104
ENSG00000091106	NLRC4	0
ENSG00000091127	PUS7	1614.67	0.0448502	0.0704445	0.636674	0.524337	0.592566
ENSG00000091128	LAMB4	11.5716	-0.254435	0.895007	-0.284283	0.776194	0.818106
ENSG00000091129	NRCAM	6352.1	-3.74242	0.121419	-30.8223	1.31812e-208	4.53956e-207
ENSG00000091136	LAMB1	8235.88	-2.9813	0.071814	-41.5142	0	0
ENSG00000091137	SLC26A4	15.062	1.96312	0.691926	2.83719	0.0045513	0.00740584
ENSG00000091138	SLC26A3	0
ENSG00000091140	DLD	4957.27	-0.0557339	0.0744187	-0.748923	0.453904	0.525104
ENSG00000091157	WDR7	790.423	-0.0754122	0.145721	-0.517509	0.604801	0.668066
ENSG00000091164	TXNL1	2174.5	-0.755571	0.0721299	-10.4751	1.12364e-25	4.84621e-25
ENSG00000091181	IL5RA	0
ENSG00000091262	ABCC6	9.96856	-3.22206	0.897542	-3.58987	0.000330847	0.00059818
ENSG00000091317	CMTM6	4668.09	0.210597	0.0466385	4.51552	6.31602e-06	1.27828e-05
ENSG00000091409	ITGA6	3230.41	-2.8521	0.098353	-28.9986	6.85755e-185	2.03025e-183
ENSG00000091428	RAPGEF4	85.2321	2.95727	0.425056	6.95735	3.46737e-12	9.57381e-12
ENSG00000091436	MAP3K20	3297.27	-1.02435	0.0684299	-14.9694	1.16344e-50	8.43629e-50
ENSG00000091482	SMPX	0.941452	3.18571	2.59948	1.22552	0.22038	0.281686
ENSG00000091483	FH	2543.65	-1.17986	0.0687438	-17.1631	5.01659e-66	4.6937e-65
ENSG00000091490	SEL1L3	1979.34	-2.81185	0.0676477	-41.5661	0	0
ENSG00000091513	TF	83.0329	-1.39931	0.446986	-3.13054	0.00174486	0.00295906
ENSG00000091527	CDV3	6146.35	-0.150684	0.0527828	-2.85479	0.00430658	0.00702179
ENSG00000091536	MYO15A	4.8196	0.708449	1.01759	0.696202	0.486302	0.556138
ENSG00000091542	ALKBH5	5051.29	-0.0732358	0.0573707	-1.27654	0.201766	0.260053
ENSG00000091583	APOH	174.071	-11.036	1.1912	-9.26462	1.95782e-20	7.27878e-20
ENSG00000091592	NLRP1	5.44204	0.237763	1.01043	0.235309	0.813969	0.850624
ENSG00000091622	PITPNM3	123.64	0.176403	0.229183	0.769705	0.441475	0.512706
ENSG00000091640	SPAG7	1579.46	-0.825315	0.0659044	-12.5229	5.5941e-36	3.08782e-35
ENSG00000091651	ORC6	1606.64	0.612573	0.0680721	8.99888	2.28036e-19	8.1703e-19
ENSG00000091656	ZFHX4	885.51	1.56829	0.170479	9.19934	3.60164e-20	1.32732e-19
ENSG00000091664	SLC17A6	0
ENSG00000091704	CPA1	0
ENSG00000091732	ZC3HC1	1261.67	0.0191007	0.0806213	0.236919	0.81272	0.849657
ENSG00000091831	ESR1	0.147426	0.661057	4.08047	0.162005	0.871302
ENSG00000091844	RGS17	391.714	-0.820272	0.118283	-6.93483	4.06711e-12	1.11898e-11
ENSG00000091879	ANGPT2	4.66221	1.85442	1.10963	1.6712	0.0946822	0.130249
ENSG00000091947	TMEM101	1292.41	-1.26468	0.0924825	-13.6748	1.43616e-42	9.09567e-42
ENSG00000091972	CD200	5.21206	0.225692	0.931525	0.242282	0.808562	0.846025
ENSG00000091986	CCDC80	867.207	-3.08252	0.120481	-25.5852	2.22776e-144	4.82542e-143
ENSG00000092009	CMA1	0
ENSG00000092010	PSME1	3749.78	-2.1422	0.0701998	-30.5158	1.60987e-204	5.4236e-203
ENSG00000092020	PPP2R3C	685.032	0.0990146	0.0943879	1.04902	0.29417	0.362378
ENSG00000092036	HAUS4	1125.22	-0.542679	0.0788949	-6.8785	6.04865e-12	1.65241e-11
ENSG00000092051	JPH4	0.147548	0.661057	4.08047	0.162005	0.871302
ENSG00000092054	MYH7	0.295096	1.53494	4.03976	0.379957	0.703977
ENSG00000092067	CEBPE	0.16613	-1.2625	4.08047	-0.309399	0.757018
ENSG00000092068	SLC7A8	492.799	5.99166	0.264062	22.6904	5.5781e-114	9.07505e-113
ENSG00000092094	OSGEP	1277.7	0.969187	0.0916564	10.5741	3.92749e-26	1.71261e-25
ENSG00000092096	SLC22A17	180.513	-0.469145	0.223217	-2.10175	0.0355752	0.0524197
ENSG00000092098	RNF31	1397.17	-0.208104	0.072476	-2.87135	0.00408726	0.00668415
ENSG00000092108	SCFD1	2199.39	0.352423	0.0638266	5.52157	3.3598e-08	7.73988e-08
ENSG00000092140	G2E3	1469.97	0.339636	0.118765	2.85972	0.00424013	0.00692439
ENSG00000092148	HECTD1	5796.42	-0.2022	0.049255	-4.10518	4.04009e-05	7.77645e-05
ENSG00000092199	HNRNPC	38140.4	0.388855	0.0359751	10.809	3.12091e-27	1.40683e-26
ENSG00000092200	RPGRIP1	22.0762	-3.8449	0.739802	-5.1972	2.02315e-07	4.455e-07
ENSG00000092201	SUPT16H	14565.3	0.792486	0.0486458	16.2909	1.14447e-59	9.57839e-59
ENSG00000092203	TOX4	2718.74	0.152229	0.0550409	2.76574	0.00567932	0.00916263
ENSG00000092208	GEMIN2	764.228	0.923449	0.107033	8.62771	6.2593e-18	2.14059e-17
ENSG00000092295	TGM1	13.1776	-0.1032	0.684253	-0.150822	0.880116	0.906385
ENSG00000092330	TINF2	1294.05	-0.305718	0.0896575	-3.40984	0.00065	0.00114434
ENSG00000092345	DAZL	0
ENSG00000092377	TBL1Y	0
ENSG00000092421	SEMA6A	1546.9	12.1152	1.02294	11.8436	2.32319e-32	1.18249e-31
ENSG00000092439	TRPM7	2553.67	-0.590787	0.0843574	-7.00338	2.49858e-12	6.94849e-12
ENSG00000092445	TYRO3	1165.76	0.953908	0.0991328	9.62253	6.42314e-22	2.49597e-21
ENSG00000092470	WDR76	1336.72	0.215997	0.0861188	2.50813	0.0121372	0.0189426
ENSG00000092529	CAPN3	13.2192	2.25452	0.667857	3.37575	0.000736146	0.00128952
ENSG00000092531	SNAP23	1727.07	0.810341	0.0790271	10.254	1.13599e-24	4.76658e-24
ENSG00000092607	TBX15	14.8939	5.29752	1.16615	4.54275	5.5525e-06	1.12769e-05
ENSG00000092621	PHGDH	10577.1	2.24468	0.058637	38.2809	0	0
ENSG00000092758	COL9A3	41.5188	6.55364	0.872317	7.51291	5.78272e-14	1.71614e-13
ENSG00000092820	EZR	13085.5	-1.3198	0.0439728	-30.0141	6.42911e-198	2.07554e-196
ENSG00000092841	MYL6	21115.5	-1.30572	0.0775013	-16.8477	1.09116e-63	9.76153e-63
ENSG00000092847	AGO1	1925.27	0.690108	0.0629084	10.97	5.3243e-28	2.44762e-27
ENSG00000092850	TEKT2	3.00585	4.87994	1.8087	2.69804	0.00697488	0.0111501
ENSG00000092853	CLSPN	2729.98	1.10787	0.0905048	12.241	1.87775e-34	1.00249e-33
ENSG00000092871	RFFL	1675.19	-2.05072	0.0762936	-26.8793	3.83462e-159	9.24441e-158
ENSG00000092929	UNC13D	102.7	-2.79952	0.375853	-7.44845	9.44404e-14	2.78093e-13
ENSG00000092931	MFSD11	624.61	-0.572625	0.100106	-5.72019	1.06405e-08	2.50819e-08
ENSG00000092964	DPYSL2	4473.75	-2.96394	0.0559323	-52.9915	0	0
ENSG00000092969	TGFB2	1675.14	-8.00684	0.221668	-36.1209	1.06652e-285	5.27941e-284
ENSG00000092978	GPATCH2	650.362	-0.683787	0.108499	-6.30227	2.93325e-10	7.44665e-10
ENSG00000093000	NUP50	4604.34	1.49877	0.0802225	18.6827	6.85056e-78	7.46285e-77
ENSG00000093009	CDC45	2592.71	1.50657	0.064715	23.28	7.06714e-120	1.21357e-118
ENSG00000093010	COMT	2957.89	-0.130287	0.0750042	-1.73706	0.0823771	0.114501
ENSG00000093072	ADA2	4.85835	-1.86986	1.38322	-1.35181	0.176435	0.23032
ENSG00000093134	VNN3	0.20982	-1.2625	4.08047	-0.309399	0.757018
ENSG00000093144	ECHDC1	2233.47	0.2672	0.0682275	3.9163	8.99175e-05	0.000169335
ENSG00000093167	LRRFIP2	1870.23	0.029803	0.0746758	0.399098	0.689821	0.744787
ENSG00000093183	SEC22C	2118.92	0.321266	0.0727966	4.4132	1.01852e-05	2.03803e-05
ENSG00000093217	XYLB	699.324	0.902881	0.139633	6.46608	1.00579e-10	2.60688e-10
ENSG00000094631	HDAC6	1401.11	0.469984	0.136022	3.45521	0.000549864	0.000974241
ENSG00000094661	OR1I1	5.66351	0.192408	1.10049	0.174839	0.861206	0.890567
[truncated: 33,101 more rows]

## Sheet: NIN-KO-induced-vs-WT-induced
Ensembl Gene ID	Gene symbol	BaseMean	log2(FC)	StdErr	Wald-Stats	P-value	P-adj
ENSG00000000003	TSPAN6	2021.88	0.0249497	0.0683614	0.364967	0.715136	0.844026
ENSG00000000005	TNMD	0
ENSG00000000419	DPM1	1417.05	-0.0450677	0.0809006	-0.557075	0.577476	0.748393
ENSG00000000457	SCYL3	286.245	0.0834476	0.144313	0.578238	0.563103	0.736265
ENSG00000000460	C1orf112	812.522	0.0421206	0.0892589	0.471893	0.637003	0.792379
ENSG00000000938	FGR	0
ENSG00000000971	CFH	2887.39	0.554295	0.0854709	6.48519	8.86222e-11	1.15582e-09
ENSG00000001036	FUCA2	2659.74	-0.241917	0.067189	-3.60055	0.000317547	0.00162994
ENSG00000001084	GCLC	9451.97	-0.23188	0.0611202	-3.79383	0.000148338	0.000821611
ENSG00000001167	NFYA	1001.13	0.115812	0.0806643	1.43573	0.151078	0.299314
ENSG00000001460	STPG1	361.025	-0.0167952	0.158922	-0.105682	0.915835	0.959241
ENSG00000001461	NIPAL3	789.147	0.0459431	0.0903799	0.508333	0.61122	0.774333
ENSG00000001497	LAS1L	4424.31	-0.111113	0.0586087	-1.89584	0.057981	0.14383
ENSG00000001561	ENPP4	303.396	1.13267	0.136022	8.3271	8.28496e-17	1.79005e-15
ENSG00000001617	SEMA3F	137.688	-2.40821	0.230474	-10.4489	1.48186e-25	5.41771e-24
ENSG00000001626	CFTR	5.49257	0.994875	1.11372	0.893291	0.371701	0.567016
ENSG00000001629	ANKIB1	2554.96	-0.00484882	0.11509	-0.0421305	0.966395	0.983256
ENSG00000001630	CYP51A1	6150.91	0.0159426	0.0474982	0.335646	0.737138	0.859181
ENSG00000001631	KRIT1	861.479	-0.531334	0.119902	-4.43142	9.36152e-06	6.48207e-05
ENSG00000002016	RAD52	336.227	0.177464	0.176647	1.00462	0.315078	0.508027
ENSG00000002079	MYH16	16.2016	-0.189406	0.60988	-0.310563	0.756133	0.870752
ENSG00000002330	BAD	1288.89	0.34967	0.0976596	3.5805	0.000342937	0.00175116
ENSG00000002549	LAP3	4296.17	-0.146229	0.0551561	-2.65119	0.00802083	0.0279094
ENSG00000002586	CD99	5823.42	-0.187056	0.0667131	-2.80389	0.00504906	0.0187856
ENSG00000002587	HS3ST1	116.074	0.689642	0.385053	1.79103	0.0732878	0.172917
ENSG00000002726	AOC1	0.435417	0.576714	3.9793	0.144929	0.884767
ENSG00000002745	WNT16	0
ENSG00000002746	HECW1	410.174	-0.0639796	0.150934	-0.423891	0.671645	0.81606
ENSG00000002822	MAD1L1	640.758	-0.0608138	0.119148	-0.510407	0.609767	0.773298
ENSG00000002834	LASP1	42264	0.169795	0.0402904	4.21429	2.5057e-05	0.00016206
ENSG00000002919	SNX11	1016.93	-0.097652	0.107663	-0.907013	0.3644	0.559639
ENSG00000002933	TMEM176A	1.53837	1.30186	2.09663	0.62093	0.534646
ENSG00000003056	M6PR	10031.4	-0.284924	0.0605416	-4.70625	2.52315e-06	1.89946e-05
ENSG00000003096	KLHL13	130.601	1.56629	0.205514	7.62131	2.51106e-14	4.46116e-13
ENSG00000003137	CYP26B1	457.771	-1.19745	0.144958	-8.26065	1.44877e-16	3.07966e-15
ENSG00000003147	ICA1	153.493	0.894182	0.276795	3.23049	0.00123579	0.00548722
ENSG00000003249	DBNDD1	2049.48	0.0932594	0.0724364	1.28747	0.197932	0.365249
ENSG00000003393	ALS2	1156.5	-0.381929	0.104113	-3.66839	0.000244081	0.0012893
ENSG00000003400	CASP10	322.366	-0.676129	0.165254	-4.09147	4.28656e-05	0.000265706
ENSG00000003402	CFLAR	2770.56	-0.549211	0.0627691	-8.74971	2.13901e-18	5.20547e-17
ENSG00000003436	TFPI	1949.36	-0.374985	0.0705026	-5.31874	1.04486e-07	9.50062e-07
ENSG00000003509	NDUFAF7	686.93	-0.389416	0.108128	-3.60144	0.000316456	0.00162593
ENSG00000003756	RBM5	1018.94	-0.0829369	0.112062	-0.740098	0.459241	0.648422
ENSG00000003987	MTMR7	0.331916	-1.8204	4.03662	-0.450971	0.652011
ENSG00000003989	SLC7A2	316.237	0.971691	0.149369	6.5053	7.7536e-11	1.01627e-09
ENSG00000004059	ARF5	3049.19	0.31677	0.0735211	4.30856	1.64321e-05	0.000109414
ENSG00000004139	SARM1	591.565	0.22625	0.116496	1.94213	0.0521217	0.132115
ENSG00000004142	POLDIP2	7974.17	0.0627821	0.0607118	1.0341	0.30109	0.491515
ENSG00000004399	PLXND1	2331.5	-0.637247	0.105726	-6.02736	1.66663e-09	1.90607e-08
ENSG00000004455	AK2	4754.91	-0.118134	0.0538021	-2.19571	0.0281125	0.0795001
ENSG00000004468	CD38	519.489	-1.58148	0.134821	-11.7302	8.92488e-32	4.31069e-30
ENSG00000004478	FKBP4	10091.8	-0.0808642	0.0489515	-1.65193	0.0985495	0.216842
ENSG00000004487	KDM1A	3297.85	-0.0712631	0.054455	-1.30866	0.19065	0.35542
ENSG00000004534	RBM6	1071.87	-0.01412	0.0777556	-0.181594	0.855901	0.927295
ENSG00000004660	CAMKK1	480.572	-0.879251	0.114348	-7.68925	1.48005e-14	2.67458e-13
ENSG00000004700	RECQL	3018.48	-0.208857	0.0840987	-2.48347	0.0130109	0.0422478
ENSG00000004766	VPS50	807.806	-0.283402	0.103876	-2.72826	0.00636689	0.0229115
ENSG00000004776	HSPB6	6.66608	-0.766371	0.866198	-0.884753	0.37629	0.571289
ENSG00000004777	ARHGAP33	168.475	0.102452	0.214973	0.476578	0.633662	0.789965
ENSG00000004779	NDUFAB1	2140.48	0.0845266	0.090115	0.937985	0.348252	0.543024
ENSG00000004799	PDK4	1509.62	-0.547328	0.0836171	-6.54565	5.92381e-11	7.8228e-10
ENSG00000004809	SLC22A16	0
ENSG00000004838	ZMYND10	17.7305	0.528955	0.669786	0.789737	0.429681	0.620688
ENSG00000004846	ABCB5	6.52952	0.987619	0.992439	0.995142	0.319667	0.5133
ENSG00000004848	ARX	67.4704	-0.0714168	0.418569	-0.170622	0.864521	0.932795
ENSG00000004864	SLC25A13	2816.51	0.0442122	0.0670104	0.65978	0.509395	0.692672
ENSG00000004866	ST7	912.131	-0.248735	0.0898913	-2.76706	0.00565639	0.0207182
ENSG00000004897	CDC27	5434.68	-0.127041	0.0947479	-1.34083	0.179975	0.340138
ENSG00000004939	SLC4A1	2.57534	0.910649	1.53106	0.594783	0.551989	0.727601
ENSG00000004948	CALCR	0.898602	-2.42634	2.67094	-0.908422	0.363655
ENSG00000004961	HCCS	2017.6	0.10453	0.0789967	1.32322	0.185761	0.348395
ENSG00000004975	DVL2	2370.98	0.380129	0.0610613	6.22537	4.80419e-10	5.85925e-09
ENSG00000005001	PRSS22	1.4201	-3.92562	2.58122	-1.52084	0.128301
ENSG00000005007	UPF1	2686.39	0.011163	0.0574787	0.194211	0.846011	0.921424
ENSG00000005020	SKAP2	2036.62	0.0218292	0.0685669	0.318363	0.750209	0.866838
ENSG00000005022	SLC25A5	22530	0.0426755	0.0614324	0.694674	0.48726	0.674092
ENSG00000005059	MCUB	652.381	0.562484	0.136702	4.11469	3.87704e-05	0.000241554
ENSG00000005073	HOXA11	9.46091	-2.04168	0.774036	-2.6377	0.00834696	0.0288403
ENSG00000005075	POLR2J	2060.64	0.0411692	0.097547	0.422045	0.672992	0.816817
ENSG00000005100	DHX33	2818.85	-0.0496853	0.0845598	-0.587576	0.556817	0.731645
ENSG00000005102	MEOX1	0
ENSG00000005108	THSD7A	2564.8	2.473	0.0953263	25.9424	2.21394e-148	1.29507e-145
ENSG00000005156	LIG3	2268.53	-0.0950812	0.0804862	-1.18134	0.237469	0.416238
ENSG00000005175	RPAP3	2183.5	0.0905401	0.0818195	1.10658	0.268474	0.455699
ENSG00000005187	ACSM3	476.623	0.749322	0.135956	5.5115	3.55798e-08	3.46881e-07
ENSG00000005189	REXO5	185.951	0.246856	0.191806	1.28701	0.198091	0.365283
ENSG00000005194	CIAPIN1	2310.81	-0.0346719	0.0665538	-0.520961	0.602394	0.76806
ENSG00000005206	SPPL2B	523.73	0.639624	0.130779	4.89089	1.00382e-06	8.03161e-06
ENSG00000005238	FAM214B	404.812	-0.180538	0.129265	-1.39665	0.162519	0.316345
ENSG00000005243	COPZ2	108.196	-0.948453	0.214849	-4.41451	1.01241e-05	6.9734e-05
ENSG00000005249	PRKAR2B	406.087	0.026438	0.11755	0.224909	0.82205	0.908368
ENSG00000005302	MSL3	1018.88	-0.357186	0.0821679	-4.34703	1.37993e-05	9.29805e-05
ENSG00000005339	CREBBP	2870.46	0.16303	0.0918423	1.77511	0.0758792	0.17752
ENSG00000005379	TSPOAP1	0.157045	1.01599	4.08047	0.248987	0.803371
ENSG00000005381	MPO	0
ENSG00000005421	PON1	5.55441	-1.00135	1.24637	-0.803413	0.421736	0.613864
ENSG00000005436	GCFC2	437.54	-0.0860741	0.123856	-0.694955	0.487084	0.674056
ENSG00000005448	WDR54	1636.97	-0.0301586	0.0779536	-0.386879	0.698846	0.833918
ENSG00000005469	CROT	574.364	0.0140248	0.111378	0.125921	0.899795	0.951092
ENSG00000005471	ABCB4	4.54479	0.673199	1.01497	0.66327	0.507157	0.69064
ENSG00000005483	KMT2E	2060.55	0.0885847	0.106354	0.832925	0.404887	0.597544
ENSG00000005486	RHBDD2	1626.48	-0.403271	0.0990071	-4.07315	4.63806e-05	0.000285033
ENSG00000005513	SOX8	12.4555	-0.967028	0.623206	-1.5517	0.120734	0.253204
ENSG00000005700	IBTK	4424.49	-0.446663	0.079985	-5.58434	2.34588e-08	2.33612e-07
ENSG00000005801	ZNF195	651.06	0.0425352	0.0937841	0.453543	0.650158	0.80104
ENSG00000005810	MYCBP2	1580.95	0.278521	0.264719	1.05214	0.292735	0.482296
ENSG00000005812	FBXL3	926.046	-0.144427	0.0840254	-1.71885	0.0856417	0.194734
ENSG00000005844	ITGAL	29.5556	1.12559	0.541189	2.07985	0.037539	0.101004
ENSG00000005882	PDK2	527.832	0.291921	0.153165	1.90593	0.0566595	0.141371
ENSG00000005884	ITGA3	31934.6	-0.225785	0.0517569	-4.3624	1.28642e-05	8.70512e-05
ENSG00000005889	ZFX	1281.9	0.263681	0.108065	2.44002	0.0146866	0.0466719
ENSG00000005893	LAMP2	6091.65	-0.295974	0.0569078	-5.20093	1.98292e-07	1.73797e-06
ENSG00000005961	ITGA2B	28.9159	-0.0363452	0.433665	-0.0838094	0.933208	0.967449
ENSG00000005981	ASB4	65.309	0.103998	0.289173	0.359641	0.719116	0.846138
ENSG00000006007	GDE1	4224.45	-0.0307753	0.0531858	-0.578637	0.562834	0.736265
ENSG00000006015	REX1BD	430.612	0.795773	0.119603	6.65343	2.86338e-11	3.89529e-10
ENSG00000006016	CRLF1	3.45643	-0.509356	1.2792	-0.398184	0.690495	0.828078
ENSG00000006025	OSBPL7	251.774	0.262832	0.158465	1.65862	0.0971929	0.214365
ENSG00000006042	TMEM98	961.137	-0.741447	0.0877002	-8.45434	2.80661e-17	6.33252e-16
ENSG00000006047	YBX2	12.7161	1.2012	0.825558	1.45501	0.145665	0.290889
ENSG00000006059	KRT33A	0
ENSG00000006062	MAP3K14	3101.51	-1.65076	0.0653017	-25.2789	5.4452e-141	2.6061e-138
ENSG00000006071	ABCC8	52.8952	0.645489	0.314044	2.05541	0.0398393	0.106359
ENSG00000006116	CACNG3	0
ENSG00000006118	TMEM132A	3112.84	-0.45809	0.0729538	-6.27917	3.40381e-10	4.21976e-09
ENSG00000006125	AP2B1	22752.5	0.083133	0.0441492	1.883	0.0597004	0.147352
ENSG00000006128	TAC1	0
ENSG00000006194	ZNF263	1147.43	-0.400643	0.0804566	-4.97962	6.37099e-07	5.21635e-06
ENSG00000006210	CX3CL1	11.0947	0.10726	0.666681	0.160887	0.872182	0.936438
ENSG00000006282	SPATA20	3216.33	-0.0215114	0.0576264	-0.37329	0.708933	0.840512
ENSG00000006283	CACNA1G	391.79	-1.19842	0.165164	-7.25596	3.98823e-13	6.51397e-12
ENSG00000006327	TNFRSF12A	6038.77	0.218249	0.0823873	2.64906	0.00807167	0.0280431
ENSG00000006377	DLX6	0.453363	-2.2864	3.80833	-0.600368	0.548261
ENSG00000006432	MAP3K9	1207.28	0.178683	0.0984619	1.81474	0.0695643	0.166142
ENSG00000006451	RALA	1218.97	0.205081	0.0862622	2.37742	0.0174344	0.0537287
ENSG00000006453	BAIAP2L1	2895.51	-0.277342	0.0643201	-4.31191	1.61852e-05	0.00010786
ENSG00000006459	KDM7A	150.228	-0.30902	0.192664	-1.60393	0.10873	0.233389
ENSG00000006468	ETV1	532.921	1.02098	0.111632	9.14591	5.91325e-20	1.59104e-18
ENSG00000006530	AGK	1473.19	0.0452966	0.075136	0.602862	0.546601	0.723275
ENSG00000006534	ALDH3B1	6956.18	-0.227421	0.0639185	-3.55799	0.000373709	0.00188634
ENSG00000006555	TTC22	0.157045	1.01599	4.08047	0.248987	0.803371
ENSG00000006576	PHTF2	1164.63	-0.109	0.0999394	-1.09066	0.275421	0.463703
ENSG00000006606	CCL26	54.2383	-0.472681	0.306605	-1.54166	0.123156	0.256885
ENSG00000006607	FARP2	1055.88	-0.541884	0.12405	-4.36827	1.25234e-05	8.49622e-05
ENSG00000006611	USH1C	34.5538	-0.037455	0.38337	-0.0976993	0.922171	0.962387
ENSG00000006625	GGCT	1761.9	-0.184015	0.0725571	-2.53614	0.0112082	0.037221
ENSG00000006634	DBF4	1257.82	-0.108944	0.0920669	-1.18331	0.236686	0.415542
ENSG00000006638	TBXA2R	21.9038	-0.368418	0.569546	-0.646862	0.517721	0.700189
ENSG00000006652	IFRD1	1202.36	-0.656481	0.0802979	-8.17557	2.9448e-16	6.07976e-15
ENSG00000006659	LGALS14	0
ENSG00000006695	COX10	1055.42	0.0265268	0.097374	0.272422	0.785298	0.888685
ENSG00000006704	GTF2IRD1	781.493	0.330151	0.0907434	3.63829	0.000274451	0.00142998
ENSG00000006712	PAF1	3550.31	0.212328	0.06238	3.40378	0.000664601	0.00313991
ENSG00000006715	VPS41	2367.1	0.195244	0.0672493	2.90328	0.00369276	0.0143477
ENSG00000006740	ARHGAP44	279.531	-0.517882	0.153034	-3.38409	0.000714144	0.00335092
ENSG00000006744	ELAC2	5264.71	0.0025383	0.0661237	0.0383871	0.969379	0.98478
ENSG00000006747	SCIN	21.5068	-0.61967	0.591979	-1.04678	0.295203	0.484661
ENSG00000006756	ARSD	1033.34	0.550584	0.102503	5.37139	7.81335e-08	7.27189e-07
ENSG00000006757	PNPLA4	285.129	-0.432993	0.15418	-2.80836	0.00497947	0.0185617
ENSG00000006788	MYH13	0
ENSG00000006831	ADIPOR2	5263.95	-0.264443	0.0505879	-5.22741	1.71904e-07	1.52531e-06
ENSG00000006837	CDKL3	33.6021	0.346885	0.390817	0.88759	0.374761	0.569802
ENSG00000007001	UPP2	0
ENSG00000007038	PRSS21	1.7311	-4.19442	2.14645	-1.95412	0.0506871
ENSG00000007047	MARK4	446.569	0.133603	0.148548	0.899388	0.368446	0.563483
ENSG00000007062	PROM1	3.26656	0.145959	1.31293	0.11117	0.911481	0.956986
ENSG00000007080	CCDC124	1929.93	0.214023	0.0728203	2.93906	0.00329212	0.0129795
ENSG00000007129	CEACAM21	0.155593	1.01599	4.08047	0.248987	0.803371
ENSG00000007168	PAFAH1B1	7206.2	0.0569728	0.0594545	0.958257	0.337933	0.532772
ENSG00000007171	NOS2	9.93184	0.427823	0.714299	0.598941	0.549212	0.725819
ENSG00000007174	DNAH9	1.17432	-1.07553	2.23014	-0.482268	0.629615
ENSG00000007202	KIAA0100	11831.3	0.185563	0.0610012	3.04195	0.00235049	0.00970705
ENSG00000007216	SLC13A2	4.07304	0.790477	1.0712	0.737933	0.460555	0.649523
ENSG00000007237	GAS7	65.4435	0.23969	0.306121	0.78299	0.433633	0.62432
ENSG00000007255	TRAPPC6A	546.617	0.182379	0.129127	1.41239	0.157834	0.309476
ENSG00000007264	MATK	3.19702	-1.34207	1.4778	-0.908157	0.363795	0.559037
ENSG00000007306	CEACAM7	1.68749	1.89461	1.9775	0.958084	0.338021
ENSG00000007312	CD79B	2.15386	-0.0148097	1.61088	-0.00919351	0.992665
ENSG00000007314	SCN4A	6.06124	-1.85105	1.09036	-1.69765	0.0895739	0.201414
ENSG00000007341	ST7L	252.017	0.406975	0.151461	2.68699	0.00720983	0.025509
ENSG00000007350	TKTL1	0
ENSG00000007372	PAX6	50.151	-0.285071	0.309943	-0.919754	0.357701	0.552846
ENSG00000007376	RPUSD1	1074.22	-0.0162779	0.0861854	-0.188871	0.850194	0.923773
ENSG00000007384	RHBDF1	686.528	0.71868	0.0982743	7.313	2.61247e-13	4.33417e-12
ENSG00000007392	LUC7L	919.052	-0.0199454	0.0977741	-0.203995	0.838357	0.917031
ENSG00000007402	CACNA2D2	56.9141	1.58675	0.343232	4.62296	3.78307e-06	2.77005e-05
ENSG00000007516	BAIAP3	23.9932	0.560645	0.593906	0.943996	0.345171	0.53998
ENSG00000007520	TSR3	1574.91	0.149871	0.082445	1.81783	0.0690903	0.165135
ENSG00000007541	PIGQ	1250.83	0.141526	0.0922977	1.53336	0.125187	0.260188
ENSG00000007545	CRAMP1	883.738	0.101898	0.11258	0.90512	0.365402	0.560533
ENSG00000007866	TEAD3	221.939	-0.146105	0.151354	-0.96532	0.334384	0.529332
ENSG00000007908	SELE	0
ENSG00000007923	DNAJC11	2429.18	0.0422858	0.0649845	0.650705	0.515237	0.698211
ENSG00000007933	FMO3	2.282	-0.594984	1.766	-0.33691	0.736185
ENSG00000007944	MYLIP	178.607	0.160354	0.170295	0.941627	0.346384	0.541394
ENSG00000007952	NOX1	8.31238	-4.46194	1.23414	-3.61543	0.000299854	0.0015497
ENSG00000007968	E2F2	600.496	0.0905101	0.096862	0.934423	0.350086	0.545076
ENSG00000008018	PSMB1	4737.02	-0.111261	0.0629269	-1.7681	0.0770442	0.17974
ENSG00000008056	SYN1	6.77915	0.302862	0.976339	0.310201	0.756408	0.870978
ENSG00000008083	JARID2	621.173	-0.15979	0.107685	-1.48387	0.137844	0.279367
ENSG00000008086	CDKL5	1444.77	-0.47902	0.136037	-3.52124	0.000429527	0.00213198
ENSG00000008118	CAMK1G	2.67018	0.693906	1.44214	0.481165	0.630399	0.788101
ENSG00000008128	CDK11A	627.531	-0.098759	0.100756	-0.980178	0.326998	0.521467
ENSG00000008130	NADK	1661.52	0.256128	0.0885758	2.89162	0.0038326	0.0148399
ENSG00000008196	TFAP2B	0
ENSG00000008197	TFAP2D	0
ENSG00000008226	DLEC1	1.01737	2.26581	2.30723	0.982046	0.326077
ENSG00000008256	CYTH3	1924.7	0.0181615	0.0735368	0.246971	0.804931	0.900614
ENSG00000008277	ADAM22	204.103	1.9741	0.333705	5.9157	3.30468e-09	3.68342e-08
ENSG00000008282	SYPL1	4991.79	0.0911438	0.049037	1.85868	0.063073	0.153802
ENSG00000008283	CYB561	1275.26	0.051281	0.0787095	0.651523	0.514709	0.697616
ENSG00000008294	SPAG9	6083.8	-0.290059	0.0668999	-4.33572	1.45283e-05	9.75596e-05
ENSG00000008300	CELSR3	423.773	-0.0459534	0.120327	-0.381905	0.702532	0.836408
ENSG00000008311	AASS	25.8225	0.555855	0.482556	1.1519	0.249363	0.430996
ENSG00000008323	PLEKHG6	3.12024	0.628536	1.25265	0.501764	0.615834	0.777947
ENSG00000008324	SS18L2	269.885	-0.130468	0.160105	-0.81489	0.415135	0.607547
ENSG00000008382	MPND	232.349	0.138345	0.174392	0.793301	0.427602	0.619107
ENSG00000008394	MGST1	15751.3	-0.209179	0.0666743	-3.13733	0.00170494	0.00732131
ENSG00000008405	CRY1	649.114	-0.210693	0.115524	-1.82381	0.0681811	0.163557
ENSG00000008438	PGLYRP1	0
ENSG00000008441	NFIX	555.302	0.781317	0.118394	6.59931	4.13085e-11	5.52904e-10
ENSG00000008513	ST3GAL1	1279.36	1.35536	0.139287	9.7307	2.23049e-22	6.82721e-21
ENSG00000008516	MMP25	5.33212	-1.46741	0.985483	-1.48902	0.136481	0.277246
ENSG00000008517	IL32	215.542	0.499468	0.178271	2.80174	0.00508286	0.0188935
ENSG00000008710	PKD1	1189.33	0.255307	0.118302	2.15809	0.0309209	0.086147
ENSG00000008735	MAPK8IP2	307.696	-0.859566	0.138868	-6.18981	6.02351e-10	7.29006e-09
ENSG00000008838	MED24	2862.53	-0.0899266	0.056731	-1.58514	0.112935	0.2403
ENSG00000008853	RHOBTB2	1427.4	-0.270389	0.072613	-3.7237	0.000196327	0.00105937
ENSG00000008869	HEATR5B	869.82	-0.13354	0.102982	-1.29672	0.194727	0.360933
ENSG00000008952	SEC62	4863.05	0.0822661	0.0621423	1.32383	0.185559	0.348109
ENSG00000008988	RPS20	19065.7	-0.0419782	0.0682209	-0.615328	0.538338	0.716665
ENSG00000009307	CSDE1	12923.4	0.0292836	0.0524487	0.558329	0.57662	0.747712
ENSG00000009335	UBE3C	6138.1	0.0799166	0.0541508	1.47582	0.139993	0.28231
ENSG00000009413	REV3L	914.021	0.166134	0.118491	1.40208	0.160893	0.313915
ENSG00000009694	TENM1	0.464581	-0.756229	3.35011	-0.225733	0.821409
ENSG00000009709	PAX7	128.509	1.75547	0.266103	6.59697	4.19655e-11	5.60747e-10
ENSG00000009724	MASP2	0.620396	-0.0161473	2.73464	-0.00590473	0.995289
ENSG00000009765	IYD	4.08972	-0.0264649	1.16163	-0.0227826	0.981824	0.991315
ENSG00000009780	FAM76A	223.677	-0.204107	0.160194	-1.27413	0.202619	0.370866
ENSG00000009790	TRAF3IP3	0
ENSG00000009830	POMT2	1503.93	-0.0527359	0.0745813	-0.707092	0.479509	0.666964
ENSG00000009844	VTA1	2008.57	-0.124239	0.0641774	-1.93586	0.0528846	0.133556
ENSG00000009950	MLXIPL	47.3515	-0.0870874	0.332796	-0.261684	0.793565	0.893595
ENSG00000009954	BAZ1B	6777.38	-0.0647417	0.0608266	-1.06437	0.287163	0.477266
ENSG00000010017	RANBP9	966.58	0.0328566	0.0828311	0.39667	0.691611	0.828778
ENSG00000010030	ETV7	4.546	-1.78663	1.1737	-1.52223	0.127952	0.264417
ENSG00000010072	SPRTN	682.972	-0.0384852	0.119017	-0.323358	0.746424	0.864298
ENSG00000010165	EEF1AKNMT	3273.09	-0.183827	0.0768963	-2.39058	0.0168216	0.0521864
ENSG00000010219	DYRK4	480.225	-0.297967	0.125041	-2.38295	0.0171745	0.0531121
ENSG00000010244	ZNF207	7009.33	-0.0459049	0.0531364	-0.863906	0.38764	0.582308
ENSG00000010256	UQCRC1	5532.4	0.155945	0.0643548	2.4232	0.0153843	0.0484892
ENSG00000010270	STARD3NL	1896.37	0.0493247	0.0697264	0.707404	0.479315	0.66687
ENSG00000010278	CD9	4469.53	0.22633	0.0556932	4.06386	4.82668e-05	0.000295361
ENSG00000010282	HHATL	0
ENSG00000010292	NCAPD2	8254.67	-0.0227442	0.0605101	-0.375875	0.70701	0.839462
ENSG00000010295	IFFO1	21.6681	-1.23947	0.501172	-2.47315	0.0133927	0.0433007
ENSG00000010310	GIPR	14.273	0.533613	0.665502	0.80182	0.422657	0.614682
ENSG00000010318	PHF7	57.5028	-0.0716955	0.311226	-0.230365	0.817808	0.906673
ENSG00000010319	SEMA3G	14.3873	0.525262	0.637894	0.823431	0.410263	0.602874
ENSG00000010322	NISCH	807.392	0.339598	0.0865411	3.92412	8.70471e-05	0.00050638
ENSG00000010327	STAB1	3.22816	-2.93809	2.05134	-1.43228	0.152064	0.300814
ENSG00000010361	FUZ	489.378	0.702967	0.115508	6.08585	1.15873e-09	1.34963e-08
ENSG00000010379	SLC6A13	3.42237	-0.149524	1.26323	-0.118366	0.905778	0.954094
ENSG00000010404	IDS	11487.2	0.249982	0.0601516	4.15586	3.24065e-05	0.000204711
ENSG00000010438	PRSS3	117.038	0.780842	0.251726	3.10196	0.00192246	0.00813231
ENSG00000010539	ZNF200	333.531	0.0808459	0.145994	0.553763	0.579741	0.749851
ENSG00000010610	CD4	2.05931	2.36143	1.69101	1.39646	0.162575
ENSG00000010626	LRRC23	581.893	0.0296927	0.111908	0.265331	0.790754	0.89228
ENSG00000010671	BTK	1.80046	1.60881	1.93379	0.831946	0.405439
ENSG00000010704	HFE	1486.78	0.553157	0.111057	4.98085	6.33058e-07	5.18865e-06
ENSG00000010803	SCMH1	522.743	0.392297	0.158468	2.47556	0.0133027	0.0430273
ENSG00000010810	FYN	117.154	0.448126	0.236224	1.89704	0.0578232	0.143482
ENSG00000010818	HIVEP2	366.777	-0.264145	0.1601	-1.64988	0.0989681	0.217642
ENSG00000010932	FMO1	0
ENSG00000011007	ELOA	1804.46	0.125262	0.0639575	1.95852	0.0501692	0.128112
ENSG00000011009	LYPLA2	1639.57	-0.0316677	0.0876405	-0.361337	0.717848	0.845432
ENSG00000011021	CLCN6	505.862	-0.113275	0.112002	-1.01137	0.31184	0.504424
ENSG00000011028	MRC2	3355.86	0.444069	0.0543359	8.17266	3.01667e-16	6.22e-15
ENSG00000011052	NME1-NME2	127.422	-0.948533	0.227944	-4.16126	3.16498e-05	0.000200512
ENSG00000011083	SLC6A7	0
ENSG00000011105	TSPAN9	827.959	-0.0599206	0.111979	-0.535105	0.592577	0.76066
ENSG00000011114	BTBD7	375.388	0.297344	0.198809	1.49563	0.134751	0.274576
ENSG00000011132	APBA3	255.108	0.192699	0.150738	1.27837	0.201119	0.368843
ENSG00000011143	MKS1	498.809	0.36768	0.120984	3.03908	0.00237302	0.00978578
ENSG00000011198	ABHD5	632.984	-0.110374	0.101033	-1.09245	0.274634	0.462772
ENSG00000011201	ANOS1	8.70302	2.14826	0.926966	2.31752	0.0204755	0.0611862
ENSG00000011243	AKAP8L	1254.94	0.120331	0.0755081	1.59362	0.111021	0.237339
ENSG00000011258	MBTD1	373.817	-0.0452752	0.153856	-0.29427	0.768551	0.87871
ENSG00000011260	UTP18	2898.12	-0.12333	0.0636539	-1.9375	0.0526841	0.133176
ENSG00000011275	RNF216	2648.2	-0.0295833	0.0631175	-0.468703	0.639282	0.793826
ENSG00000011295	TTC19	1527.43	0.335751	0.08251	4.06922	4.71712e-05	0.000289183
ENSG00000011304	PTBP1	11990.4	0.222876	0.0689336	3.23319	0.00122416	0.00544629
ENSG00000011332	DPF1	123.132	0.423178	0.229055	1.84749	0.0646758	0.157031
ENSG00000011347	SYT7	74.4881	0.208952	0.32819	0.63668	0.524333	0.705213
ENSG00000011376	LARS2	1366.86	-0.0759232	0.071078	-1.06817	0.285445	0.475384
ENSG00000011405	PIK3C2A	2246.56	-0.480983	0.133528	-3.60213	0.000315624	0.00162271
ENSG00000011422	PLAUR	1418.84	0.121113	0.0833011	1.45392	0.145969	0.291348
ENSG00000011426	ANLN	6795.52	0.196608	0.0699278	2.81158	0.00492981	0.0184244
ENSG00000011451	WIZ	1624.39	0.0464106	0.0751312	0.617728	0.536755	0.715039
ENSG00000011454	RABGAP1	1536.36	-0.430119	0.0702159	-6.12567	9.0302e-10	1.06914e-08
ENSG00000011465	DCN	0.185477	-0.907567	4.08047	-0.222417	0.823989
ENSG00000011478	QPCTL	408.325	-0.231104	0.132075	-1.7498	0.0801534	0.185101
ENSG00000011485	PPP5C	3864.38	0.222415	0.0523035	4.2524	2.11492e-05	0.000138602
ENSG00000011523	CEP68	785.083	-0.366127	0.0948184	-3.86135	0.000112764	0.000641911
ENSG00000011566	MAP4K3	1539.74	-0.08112	0.0734206	-1.10487	0.269217	0.456715
ENSG00000011590	ZBTB32	0.303739	0.0415075	4.08047	0.0101722	0.991884
ENSG00000011600	TYROBP	0
ENSG00000011638	TMEM159	449.678	-0.364911	0.125091	-2.91716	0.0035323	0.0138058
ENSG00000011677	GABRA3	66.5336	3.06541	0.338004	9.06916	1.19941e-19	3.17845e-18
ENSG00000012048	BRCA1	3089.45	0.286107	0.0996389	2.87144	0.00408603	0.0156721
ENSG00000012061	ERCC1	3302.74	0.120217	0.0677999	1.77312	0.0762087	0.178194
ENSG00000012124	CD22	160.553	1.01473	0.212667	4.77147	1.82884e-06	1.41246e-05
ENSG00000012171	SEMA3B	799.428	2.24976	0.119239	18.8676	2.10471e-79	4.20782e-77
ENSG00000012174	MBTPS2	3189.03	0.181527	0.0687973	2.63858	0.00832539	0.0287916
ENSG00000012211	PRICKLE3	607.66	-0.0291558	0.102869	-0.283427	0.776849	0.882765
ENSG00000012223	LTF	0
ENSG00000012232	EXTL3	2204.9	-0.14327	0.0860446	-1.66507	0.0958987	0.212222
ENSG00000012504	NR1H4	50.5098	1.53844	0.369101	4.16807	3.07194e-05	0.000194853
ENSG00000012660	ELOVL5	5476.6	-0.303594	0.0528542	-5.744	9.24669e-09	9.73614e-08
ENSG00000012779	ALOX5	0
ENSG00000012817	KDM5D	643.432	-0.414788	0.134251	-3.08963	0.00200405	0.00841584
ENSG00000012822	CALCOCO1	649.34	-0.206896	0.135095	-1.53149	0.125649	0.260784
ENSG00000012963	UBR7	1873.72	0.147959	0.0737931	2.00506	0.0449568	0.117557
ENSG00000012983	MAP4K5	1634.39	0.225962	0.0811643	2.78401	0.00536916	0.0197901
ENSG00000013016	EHD3	1133.49	-0.383922	0.075221	-5.10392	3.32681e-07	2.83254e-06
ENSG00000013275	PSMC4	12135.2	0.00898802	0.0482654	0.186221	0.852271	0.924928
ENSG00000013288	MAN2B2	1346.28	-0.0666924	0.0754166	-0.88432	0.376524	0.571534
ENSG00000013293	SLC7A14	15.4614	-3.24531	1.23071	-2.63695	0.00836551	0.0288924
ENSG00000013297	CLDN11	2.2642	-1.88115	1.72258	-1.09205	0.274809
ENSG00000013306	SLC25A39	5572.72	-0.178631	0.0674241	-2.64936	0.00806445	0.0280331
ENSG00000013364	MVP	9800.68	0.173188	0.0574739	3.01333	0.00258397	0.0105428
ENSG00000013374	NUB1	2393.76	0.0518718	0.069769	0.743479	0.457192	0.646627
ENSG00000013375	PGM3	1233.56	0.0540076	0.0894575	0.603723	0.546028	0.722759
ENSG00000013392	RWDD2A	131.8	0.0586731	0.202061	0.290373	0.771531	0.880175
ENSG00000013441	CLK1	527.3	-0.556638	0.111873	-4.97564	6.50332e-07	5.31918e-06
ENSG00000013503	POLR3B	447.111	-0.340559	0.111143	-3.06415	0.00218291	0.00907765
ENSG00000013523	ANGEL1	1015.78	0.206958	0.096215	2.151	0.0314762	0.0874645
ENSG00000013561	RNF14	2228.65	0.019666	0.0657405	0.299145	0.764829	0.876421
ENSG00000013563	DNASE1L1	1195.67	0.178299	0.0897928	1.98567	0.0470704	0.12187
ENSG00000013573	DDX11	1893.35	0.0608477	0.0794861	0.765513	0.443966	0.634252
ENSG00000013583	HEBP1	1039.41	-0.362081	0.0960056	-3.77146	0.000162296	0.000891988
ENSG00000013588	GPRC5A	23260.1	-0.703619	0.0525208	-13.397	6.2999e-41	4.36406e-39
ENSG00000013619	MAMLD1	417.261	0.468485	0.116826	4.01011	6.06892e-05	0.000364181
ENSG00000013725	CD6	4.49267	1.12692	1.24729	0.903489	0.366266	0.561305
ENSG00000013810	TACC3	3864.67	0.0654704	0.0615488	1.06371	0.287458	0.477395
ENSG00000014123	UFL1	681.1	0.0945107	0.111243	0.849585	0.395556	0.589712
ENSG00000014138	POLA2	1632.25	0.500465	0.088312	5.66702	1.45305e-08	1.48157e-07
ENSG00000014164	ZC3H3	1128.61	0.0424945	0.0928651	0.457594	0.647244	0.798816
ENSG00000014216	CAPN1	8523.56	0.196011	0.045933	4.26731	1.97842e-05	0.000130088
ENSG00000014257	ACP3	1.81601	0.402701	1.78385	0.225749	0.821397
ENSG00000014641	MDH1	7536.26	-0.30826	0.0654288	-4.71138	2.46044e-06	1.85756e-05
ENSG00000014824	SLC30A9	1970.47	0.305774	0.0813434	3.75905	0.000170557	0.000933396
ENSG00000014914	MTMR11	438.256	0.679653	0.128786	5.27739	1.31038e-07	1.18128e-06
ENSG00000014919	COX15	3219.4	-0.016206	0.0662726	-0.244535	0.806816	0.901488
ENSG00000015133	CCDC88C	470.867	-0.341954	0.116097	-2.94542	0.0032252	0.012757
ENSG00000015153	YAF2	582.532	-0.342305	0.116666	-2.93406	0.00334558	0.0131569
ENSG00000015171	ZMYND11	3417.48	0.0553742	0.0681021	0.813105	0.416158	0.608649
ENSG00000015285	WAS	12.9052	0.255527	0.647413	0.39469	0.693072	0.8299
ENSG00000015413	DPEP1	20.0043	-0.913356	0.570663	-1.60052	0.109484	0.234531
ENSG00000015475	BID	1505.89	0.0290487	0.0948442	0.306278	0.759393	0.872754
ENSG00000015479	MATR3	10204.2	-0.0802738	0.0758086	-1.0589	0.289645	0.479423
ENSG00000015520	NPC1L1	2.24603	0.276473	1.39627	0.198008	0.843039
ENSG00000015532	XYLT2	1794.83	-0.14002	0.0710554	-1.97058	0.0487724	0.125437
ENSG00000015568	RGPD5	56.4253	1.73223	0.630853	2.74585	0.00603535	0.021878
ENSG00000015592	STMN4	0.157045	1.01599	4.08047	0.248987	0.803371
ENSG00000015676	NUDCD3	3023.18	0.205751	0.0762287	2.69913	0.006952	0.0247297
ENSG00000016082	ISL1	0.824219	-3.13395	2.65798	-1.17907	0.238369
ENSG00000016391	CHDH	518.027	0.705643	0.106631	6.61759	3.65105e-11	4.916e-10
ENSG00000016402	IL20RA	4.57458	1.27705	1.12459	1.13557	0.256135	0.440052
ENSG00000016490	CLCA1	0
ENSG00000016602	CLCA4	0
ENSG00000016864	GLT8D1	881.427	0.281386	0.0942941	2.98413	0.00284385	0.0114669
ENSG00000017260	ATP2C1	3214.67	-0.00115337	0.0660237	-0.017469	0.986062	0.993422
ENSG00000017427	IGF1	6.03637	0.466001	1.05159	0.443139	0.657665	0.806394
ENSG00000017483	SLC38A5	2.25203	-0.352746	1.80536	-0.195389	0.845089
ENSG00000017797	RALBP1	2663.53	-0.0816928	0.0626574	-1.3038	0.192301	0.357487
ENSG00000018189	RUFY3	226.32	-0.265781	0.227249	-1.16956	0.24218	0.42223
ENSG00000018236	CNTN1	13414	0.822808	0.0807387	10.191	2.17505e-24	7.4196e-23
ENSG00000018280	SLC11A1	16.1185	-1.4185	0.60931	-2.32804	0.0199101	0.0598289
ENSG00000018408	WWTR1	7257.98	0.461574	0.0581902	7.93217	2.15354e-15	4.18879e-14
ENSG00000018510	AGPS	2939.71	-0.459495	0.0665019	-6.9095	4.86363e-12	7.1858e-11
ENSG00000018607	ZNF806	0.312642	1.80935	4.04792	0.446981	0.654889
ENSG00000018610	CXorf56	1137.04	0.0656773	0.0790313	0.831029	0.405957	0.598313
ENSG00000018625	ATP1A2	8.23382	1.53233	0.836085	1.83275	0.0668398	0.161121
ENSG00000018699	TTC27	1176.51	-0.632123	0.0755932	-8.36216	6.15817e-17	1.34155e-15
ENSG00000018869	ZNF582	58.9939	0.395693	0.303346	1.30443	0.192088	0.357301
ENSG00000019102	VSIG2	0
ENSG00000019144	PHLDB1	628.513	0.48426	0.162488	2.98027	0.00287991	0.0115827
ENSG00000019169	MARCO	1.03043	-1.57757	2.34702	-0.672161	0.501481
ENSG00000019186	CYP24A1	17512.5	-0.277622	0.0507378	-5.47171	4.45724e-08	4.27949e-07
ENSG00000019485	PRDM11	541.96	0.184498	0.156826	1.17645	0.239415	0.418658
ENSG00000019505	SYT13	1118.5	0.149479	0.0910439	1.64183	0.100624	0.220455
ENSG00000019549	SNAI2	14.0327	-1.85832	0.642384	-2.89284	0.00381774	0.0147896
ENSG00000019582	CD74	0.561897	-0.0453008	3.6447	-0.0124292	0.990083
ENSG00000019991	HGF	1.36782	-2.73753	2.35156	-1.16413	0.24437
ENSG00000019995	ZRANB1	1158.33	-0.0254925	0.0768704	-0.33163	0.740169	0.860905
ENSG00000020129	NCDN	1158.82	-0.0151983	0.0753745	-0.201637	0.840201	0.918094
ENSG00000020181	ADGRA2	155.006	0.127637	0.196662	0.649015	0.516329	0.699271
ENSG00000020219	CCT8L1P	0.146803	-0.907567	4.08047	-0.222417	0.823989
ENSG00000020256	ZFP64	1010.46	-0.00278586	0.0810767	-0.0343607	0.972589	0.986283
ENSG00000020426	MNAT1	800.315	-0.0715065	0.0895645	-0.79838	0.42465	0.616379
ENSG00000020577	SAMD4A	510.753	0.0838703	0.157578	0.532246	0.594555	0.761961
ENSG00000020633	RUNX3	528.696	0.750358	0.139824	5.36644	8.03045e-08	7.45638e-07
ENSG00000020922	MRE11	1016.08	0.121607	0.0907046	1.34069	0.180022	0.340184
ENSG00000021300	PLEKHB1	55.5185	1.2191	0.316328	3.85391	0.000116246	0.000659953
ENSG00000021355	SERPINB1	2700.25	0.391178	0.0676897	5.779	7.51464e-09	8.03019e-08
ENSG00000021461	CYP3A43	0.518618	1.02116	3.24202	0.314977	0.752779
ENSG00000021488	SLC7A9	4.01213	-0.016105	1.108	-0.0145353	0.988403	0.994005
ENSG00000021574	SPAST	1337.56	-0.370453	0.0974708	-3.80065	0.000144316	0.00080286
ENSG00000021645	NRXN3	34.1555	1.16499	0.463716	2.5123	0.0119948	0.0393941
ENSG00000021762	OSBPL5	382.304	0.0796077	0.137414	0.579329	0.562367	0.735937
ENSG00000021776	AQR	3629.38	-0.0550835	0.0626875	-0.878699	0.379564	0.574218
ENSG00000021826	CPS1	559.936	-3.32895	0.133749	-24.8895	9.67186e-137	4.01993e-134
ENSG00000021852	C8B	0
ENSG00000022267	FHL1	1329.71	-0.207178	0.0974816	-2.12531	0.033561	0.0920408
ENSG00000022277	RTF2	3218.41	0.0738718	0.0581606	1.27014	0.204036	0.372981
ENSG00000022355	GABRA1	0
ENSG00000022556	NLRP2	3066.01	0.0342475	0.0667176	0.51332	0.607728	0.771642
ENSG00000022567	SLC45A4	1068.11	-0.416313	0.125682	-3.31243	0.00092489	0.00422799
ENSG00000022840	RNF10	5588.99	-0.181273	0.0564245	-3.21266	0.00131511	0.00580022
ENSG00000022976	ZNF839	354.314	0.204788	0.126103	1.62398	0.10438	0.226328
ENSG00000023041	ZDHHC6	1465.95	-0.174522	0.0720867	-2.421	0.0154779	0.0486676
ENSG00000023171	GRAMD1B	4081.96	-0.691213	0.0837894	-8.24941	1.59182e-16	3.37014e-15
ENSG00000023191	RNH1	6479.76	-0.0857523	0.0697709	-1.22906	0.219051	0.39355
ENSG00000023228	NDUFS1	3668.71	-0.330989	0.074499	-4.44286	8.87712e-06	6.16558e-05
ENSG00000023287	RB1CC1	2254.89	-0.110823	0.0741798	-1.49398	0.13518	0.275097
ENSG00000023318	ERP44	1605.4	-0.426559	0.0825839	-5.16516	2.40228e-07	2.07786e-06
ENSG00000023330	ALAS1	3226.93	-0.0587094	0.0670091	-0.87614	0.380954	0.575328
ENSG00000023445	BIRC3	2414.07	-0.101017	0.0658961	-1.53298	0.125281	0.260267
ENSG00000023516	AKAP11	2068.12	0.162889	0.104793	1.55439	0.120092	0.252359
ENSG00000023572	GLRX2	1086.21	-0.0899444	0.100122	-0.898348	0.369	0.564017
ENSG00000023608	SNAPC1	817.929	0.0879755	0.0869827	1.01141	0.311818	0.504424
ENSG00000023697	DERA	1456.51	-0.0272277	0.0713505	-0.381605	0.702754	0.836426
ENSG00000023734	STRAP	8215.28	-0.559395	0.0496738	-11.2614	2.036e-29	8.62107e-28
ENSG00000023839	ABCC2	18580.8	0.245937	0.0563622	4.36351	1.2799e-05	8.66473e-05
ENSG00000023892	DEF6	2.07462	0.013875	1.49184	0.00930062	0.992579
ENSG00000023902	PLEKHO1	123.122	-1.20159	0.243629	-4.93206	8.13651e-07	6.56658e-06
ENSG00000023909	GCLM	6676.87	-0.44884	0.065403	-6.86268	6.75788e-12	9.87363e-11
ENSG00000024048	UBR2	918.005	-0.157744	0.103001	-1.53149	0.125649	0.260784
ENSG00000024422	EHD2	8667.8	0.406173	0.0570537	7.11914	1.08603e-12	1.6866e-11
ENSG00000024526	DEPDC1	1557.63	0.222942	0.116194	1.9187	0.055022	0.138093
ENSG00000024862	CCDC28A	329.476	-0.103499	0.126095	-0.820806	0.411757	0.604002
ENSG00000025039	RRAGD	543.387	-0.151151	0.113056	-1.33696	0.181237	0.34195
ENSG00000025156	HSF2	416.487	0.0280453	0.118511	0.236646	0.812931	0.903867
ENSG00000025293	PHF20	1663.5	-0.178735	0.0655181	-2.72803	0.00637147	0.0229228
ENSG00000025423	HSD17B6	22.9576	0.257	0.49216	0.522189	0.601539	0.767404
ENSG00000025434	NR1H3	388.812	0.315382	0.151322	2.08418	0.0371442	0.100145
ENSG00000025708	TYMP	290.264	-2.10878	0.148889	-14.1635	1.5421e-45	1.2301e-43
ENSG00000025770	NCAPH2	1285.32	0.165515	0.0821012	2.01598	0.0438017	0.115185
ENSG00000025772	TOMM34	1562	-0.192844	0.0847692	-2.27493	0.0229104	0.0670832
ENSG00000025796	SEC63	2458.92	0.145207	0.105178	1.38059	0.167405	0.323232
ENSG00000025800	KPNA6	3087.57	0.0109229	0.0662755	0.16481	0.869093	0.935555
ENSG00000026025	VIM	36619	-0.0185186	0.0671938	-0.2756	0.782855	0.887101
ENSG00000026036	RTEL1-TNFRSF6B	62.5265	0.65145	0.30961	2.1041	0.0353697	0.0961331
ENSG00000026103	FAS	855.32	-0.188865	0.100688	-1.87574	0.0606906	0.149097
ENSG00000026297	RNASET2	377.997	0.0299534	0.118468	0.25284	0.800392	0.898368
ENSG00000026508	CD44	29215.9	0.661485	0.0645738	10.2439	1.26096e-24	4.3867e-23
ENSG00000026559	KCNG1	201.639	-0.295055	0.179376	-1.6449	0.0999905	0.219371
ENSG00000026652	AGPAT4	189.047	0.530616	0.235255	2.2555	0.0241021	0.0699759
ENSG00000026751	SLAMF7	43.2217	-0.549769	0.350432	-1.56883	0.116687	0.246714
ENSG00000026950	BTN3A1	489.094	-0.0760885	0.128232	-0.593366	0.552936	0.728424
ENSG00000027001	MIPEP	795.622	0.000382498	0.10537	0.00363005	0.997104	0.998684
ENSG00000027075	PRKCH	447.839	-0.39032	0.145653	-2.67979	0.00736694	0.0260124
ENSG00000027644	INSRR	0
ENSG00000027697	IFNGR1	965.039	-0.345055	0.0879755	-3.92217	8.77534e-05	0.000510113
ENSG00000027847	B4GALT7	1045.31	0.69985	0.0854919	8.18616	2.69693e-16	5.58993e-15
ENSG00000027869	SH2D2A	55.6924	0.754375	0.388995	1.93929	0.0524655	0.132793
ENSG00000028116	VRK2	724.482	-0.400919	0.0918791	-4.36356	1.27965e-05	8.66473e-05
ENSG00000028137	TNFRSF1B	29.5587	0.240264	0.466727	0.514786	0.606703	0.771067
ENSG00000028203	VEZT	3522.09	-0.338665	0.0602618	-5.61989	1.91081e-08	1.92102e-07
ENSG00000028277	POU2F2	15.6765	0.670717	0.711225	0.943045	0.345658	0.540634
ENSG00000028310	BRD9	672.502	0.505044	0.0996582	5.06776	4.02518e-07	3.39422e-06
ENSG00000028528	SNX1	3547.51	0.229577	0.0850954	2.69788	0.00697818	0.0248117
ENSG00000028839	TBPL1	635.814	-0.116102	0.0971903	-1.19459	0.232248	0.409744
ENSG00000029153	ARNTL2	1513.81	-0.689973	0.0826727	-8.34584	7.07073e-17	1.534e-15
ENSG00000029363	BCLAF1	5582.57	-0.0409362	0.0689515	-0.593695	0.552716	0.728255
ENSG00000029364	SLC39A9	4127.47	0.0319748	0.0560965	0.569996	0.568681	0.741007
ENSG00000029534	ANK1	819.794	0.970348	0.108711	8.92591	4.42051e-19	1.12247e-17
ENSG00000029559	IBSP	0
ENSG00000029639	TFB1M	250.605	-0.458677	0.208424	-2.20069	0.0277577	0.07868
ENSG00000029725	RABEP1	3318.8	-0.151557	0.0781347	-1.93969	0.0524175	0.132696
ENSG00000029993	HMGB3	5401.16	0.333606	0.0580307	5.74878	8.98881e-09	9.48359e-08
ENSG00000030066	NUP160	2908.47	-0.214963	0.0760917	-2.82505	0.00472728	0.0177938
ENSG00000030110	BAK1	942.544	0.058038	0.0852534	0.680771	0.496017	0.681521
ENSG00000030304	MUSK	0.146803	-0.907567	4.08047	-0.222417	0.823989
ENSG00000030419	IKZF2	43.8441	0.826346	0.420236	1.96638	0.0492542	0.126347
ENSG00000030582	GRN	10501.7	-0.112099	0.0709834	-1.57923	0.114284	0.242542
ENSG00000031003	FAM13B	920.256	-0.15528	0.108548	-1.43052	0.152567	0.301665
ENSG00000031081	ARHGAP31	93.7623	-0.00295083	0.285586	-0.0103325	0.991756	0.995771
ENSG00000031691	CENPQ	394.459	-0.011296	0.116907	-0.0966243	0.923025	0.962643
ENSG00000031698	SARS1	3537.19	-0.346607	0.0560724	-6.18142	6.35288e-10	7.65934e-09
ENSG00000031823	RANBP3	1798.95	-0.114838	0.0983329	-1.16785	0.242867	0.423009
ENSG00000032219	ARID4A	497.378	-0.212741	0.127967	-1.66247	0.0964184	0.213043
ENSG00000032389	EIPR1	1569.66	-0.199266	0.0787454	-2.53051	0.0113896	0.0377259
ENSG00000032444	PNPLA6	2464.59	0.00115609	0.107428	0.0107615	0.991414	0.995701
ENSG00000032742	IFT88	480.227	-0.332237	0.113364	-2.93071	0.00338189	0.0132737
ENSG00000033011	ALG1	2049.06	0.344577	0.0650968	5.29329	1.20133e-07	1.08732e-06
ENSG00000033030	ZCCHC8	1080.75	-0.202333	0.0776403	-2.60604	0.00915966	0.0312457
ENSG00000033050	ABCF2	3701.21	-0.162124	0.0760853	-2.13082	0.0331036	0.0910233
ENSG00000033100	CHPF2	1672.21	-0.219795	0.0743708	-2.95539	0.00312275	0.0124015
ENSG00000033122	LRRC7	8.85615	0.100766	0.751025	0.134171	0.893268	0.947436
ENSG00000033170	FUT8	1094.2	-0.0184112	0.0835161	-0.220451	0.82552	0.910013
ENSG00000033178	UBA6	1662.96	-0.0392031	0.127048	-0.308568	0.75765	0.872054
ENSG00000033327	GAB2	593.756	0.961619	0.10608	9.06504	1.24557e-19	3.28971e-18
ENSG00000033627	ATP6V0A1	2669.2	-0.0325371	0.0773608	-0.42059	0.674055	0.817213
ENSG00000033800	PIAS1	1822.26	0.129091	0.105437	1.22434	0.220824	0.395699
ENSG00000033867	SLC4A7	2680.04	0.269608	0.0833405	3.23502	0.00121633	0.00541757
ENSG00000034053	APBA2	314.689	0.136077	0.200414	0.678981	0.49715	0.682485
ENSG00000034152	MAP2K3	2564.95	-0.335976	0.0601723	-5.58356	2.35639e-08	2.34511e-07
ENSG00000034239	EFCAB1	0.801888	-2.36141	3.23861	-0.729142	0.465915
ENSG00000034510	TMSB10	52349.8	-0.25033	0.0723408	-3.46042	0.000539324	0.00261451
ENSG00000034533	ASTE1	171.363	-0.432296	0.189918	-2.27622	0.0228328	0.0669056
ENSG00000034677	RNF19A	1877.35	0.819762	0.103704	7.90485	2.68263e-15	5.17964e-14
ENSG00000034693	PEX3	322.81	0.0175018	0.129293	0.135365	0.892323	0.946816
ENSG00000034713	GABARAPL2	1826.29	0.146461	0.0770524	1.9008	0.057328	0.142634
ENSG00000034971	MYOC	0
ENSG00000035115	SH3YL1	190.874	0.0611152	0.174294	0.350644	0.725856	0.850899
ENSG00000035141	FAM136A	3686.04	-0.354529	0.0541309	-6.54948	5.77395e-11	7.63128e-10
ENSG00000035403	VCL	10759.8	-0.0565523	0.0538246	-1.05068	0.293407	0.482735
ENSG00000035499	DEPDC1B	963.448	0.140145	0.0807055	1.7365	0.0824749	0.189388
ENSG00000035664	DAPK2	116.046	-0.513408	0.238973	-2.1484	0.0316822	0.0878989
ENSG00000035681	NSMAF	1815.25	-0.227506	0.064308	-3.53776	0.000403531	0.00202215
ENSG00000035687	ADSS2	3025.78	0.15423	0.0606174	2.54431	0.0109493	0.0364685
ENSG00000035720	STAP1	0
ENSG00000035862	TIMP2	11336	-0.695123	0.0534411	-13.0073	1.11244e-38	7.1422e-37
ENSG00000035928	RFC1	1805.3	-0.278894	0.0793247	-3.51585	0.000438344	0.00217301
ENSG00000036054	TBC1D23	963.581	-0.0736749	0.0881092	-0.836177	0.403055	0.596445
ENSG00000036257	CUL3	3024.56	-0.518004	0.0581509	-8.90792	5.19993e-19	1.31404e-17
ENSG00000036448	MYOM2	18.5588	-1.93614	0.599469	-3.22976	0.00123892	0.00549959
ENSG00000036473	OTC	0
ENSG00000036530	CYP46A1	5.69948	0.0641947	1.00432	0.0639186	0.949035	0.975088
ENSG00000036549	AC118549.1	985.014	-0.433245	0.0829912	-5.22038	1.7856e-07	1.57905e-06
ENSG00000036565	SLC18A1	1.27349	1.54712	2.15491	0.717952	0.472787
ENSG00000036672	USP2	28.1354	-0.689376	0.560888	-1.22908	0.219042	0.39355
ENSG00000036828	CASR	34.8923	0.364331	0.37838	0.962869	0.335613	0.530407
ENSG00000037042	TUBG2	349.739	0.0329393	0.124362	0.264867	0.791112	0.892449
ENSG00000037241	RPL26L1	1379.2	-0.127355	0.0848302	-1.50129	0.133281	0.272779
ENSG00000037280	FLT4	248.623	0.610756	0.194668	3.13742	0.00170443	0.0073211
ENSG00000037474	NSUN2	4409.3	-0.115266	0.0499977	-2.30543	0.0211425	0.0627678
ENSG00000037637	FBXO42	626.912	0.262924	0.116683	2.25331	0.0242394	0.0702622
ENSG00000037749	MFAP3	793.51	-0.0480066	0.122883	-0.390668	0.696042	0.832023
ENSG00000037757	MRI1	628.898	0.0623905	0.104246	0.598495	0.549509	0.725908
ENSG00000037897	METTL1	891.213	-0.0860366	0.0922192	-0.932958	0.350842	0.545769
ENSG00000037965	HOXC8	123.491	-0.510063	0.231914	-2.19936	0.0278522	0.0789338
ENSG00000038002	AGA	709.7	0.18482	0.108769	1.6992	0.0892822	0.200901
ENSG00000038210	PI4K2B	598.624	0.183024	0.118213	1.54826	0.12156	0.254535
ENSG00000038219	BOD1L1	1870.38	0.0637241	0.0788614	0.808052	0.41906	0.611309
ENSG00000038274	MAT2B	2391.23	-0.0350223	0.0588341	-0.595273	0.551661	0.727473
ENSG00000038295	TLL1	18.3043	1.278	0.614228	2.08066	0.0374647	0.100855
ENSG00000038358	EDC4	2329.31	0.00932386	0.071168	0.131012	0.895766	0.949002
ENSG00000038382	TRIO	4798.04	0.289885	0.0633631	4.57498	4.76259e-06	3.44574e-05
ENSG00000038427	VCAN	1889.62	1.53422	0.112385	13.6515	1.97782e-42	1.43292e-40
ENSG00000038532	CLEC16A	1000.45	-0.247215	0.0942132	-2.624	0.00869047	0.029858
ENSG00000038945	MSR1	0.185477	-0.907567	4.08047	-0.222417	0.823989
ENSG00000039068	CDH1	2466.27	2.03156	0.0771769	26.3234	1.03636e-152	6.82014e-150
ENSG00000039123	MTREX	3281.35	-0.0429148	0.0826713	-0.519101	0.60369	0.768988
ENSG00000039139	DNAH5	103.409	0.0660696	0.294991	0.223972	0.822779	0.908478
ENSG00000039319	ZFYVE16	1909.17	0.295625	0.119272	2.47857	0.013191	0.0427185
ENSG00000039523	RIPOR1	1597.24	-0.040332	0.0892141	-0.452081	0.65121	0.801716
ENSG00000039537	C6	0.402248	0.800697	4.06607	0.196922	0.843889
ENSG00000039560	RAI14	4188.06	-0.454036	0.0628233	-7.22719	4.9308e-13	7.97104e-12
ENSG00000039600	SOX30	0.532563	-2.49357	3.60891	-0.69095	0.489597
ENSG00000039650	PNKP	796.117	0.521007	0.117604	4.43019	9.41491e-06	6.51332e-05
ENSG00000039987	BEST2	0.160707	-0.907567	4.08047	-0.222417	0.823989
ENSG00000040199	PHLPP2	1027.28	0.0748649	0.0995582	0.751972	0.452068	0.642234
ENSG00000040275	SPDL1	2868.36	0.805989	0.0925523	8.70847	3.08013e-18	7.42809e-17
ENSG00000040341	STAU2	1640.78	0.0388172	0.0960723	0.404041	0.686182	0.82483
ENSG00000040487	SLC66A1	570.363	-0.245376	0.109867	-2.23338	0.025524	0.0733566
ENSG00000040531	CTNS	971.84	0.0373068	0.108872	0.342667	0.731849	0.855491
ENSG00000040608	RTN4R	253.908	0.217133	0.184477	1.17702	0.239188	0.418499
ENSG00000040633	PHF23	2420.14	-0.128393	0.0658453	-1.94991	0.0511863	0.130245
ENSG00000040731	CDH10	10.2306	-2.83034	0.826521	-3.42441	0.00061614	0.00294086
ENSG00000040933	INPP4A	962.449	-0.349753	0.10814	-3.23428	0.00121951	0.00542868
ENSG00000041353	RAB27B	4662.22	0.533586	0.0689863	7.73466	1.03678e-14	1.89964e-13
ENSG00000041357	PSMA4	8479.71	-0.0580823	0.0598896	-0.969823	0.332135	0.526786
ENSG00000041515	MYO16	7.39564	0.519365	0.917323	0.566174	0.571276	0.743407
ENSG00000041802	LSG1	1675.06	-0.248228	0.0748605	-3.31588	0.000913564	0.00418106
ENSG00000041880	PARP3	263.547	-0.384184	0.185183	-2.07461	0.0380223	0.102061
ENSG00000041982	TNC	78.1996	-0.200088	0.351234	-0.56967	0.568901	0.741233
ENSG00000041988	THAP3	343.868	-0.0057792	0.132842	-0.0435043	0.9653	0.982655
ENSG00000042062	RIPOR3	7.57131	0.748724	0.92472	0.809677	0.418126	0.610566
ENSG00000042088	TDP1	690.093	0.227017	0.113772	1.99536	0.046004	0.119662
ENSG00000042286	AIFM2	2336.66	-0.240932	0.0671734	-3.58671	0.000334879	0.00171278
ENSG00000042304	C2orf83	1.30713	0.809087	1.93098	0.419004	0.675213
ENSG00000042317	SPATA7	185.984	0.0657308	0.170589	0.385316	0.700003	0.834593
ENSG00000042429	MED17	828.151	-0.263975	0.0891932	-2.95959	0.00308047	0.012256
ENSG00000042445	RETSAT	2581.77	0.291435	0.0854915	3.40894	0.000652161	0.00308945
ENSG00000042493	CAPG	2266.96	1.28464	0.0715289	17.9598	4.02197e-72	6.41646e-70
ENSG00000042753	AP2S1	4303.32	-0.094327	0.0734742	-1.28381	0.199208	0.366957
ENSG00000042781	USH2A	0
ENSG00000042813	ZPBP	0
ENSG00000042832	TG	9.15509	1.33431	1.19769	1.11407	0.26525	0.451245
ENSG00000042980	ADAM28	77.7575	3.29445	0.458662	7.18273	6.8333e-13	1.09015e-11
ENSG00000043039	BARX2	2.53853	-0.564922	1.39718	-0.40433	0.68597	0.82471
ENSG00000043093	DCUN1D1	1462.57	-0.0522255	0.10074	-0.518417	0.604167	0.76941
ENSG00000043143	JADE2	3703.85	0.0389566	0.0797754	0.488328	0.625317	0.784702
ENSG00000043355	ZIC2	332.507	0.258508	0.132596	1.94959	0.0512254	0.130292
ENSG00000043462	LCP2	0
ENSG00000043514	TRIT1	527.025	0.000136841	0.102887	0.00133001	0.998939	0.999463
ENSG00000043591	ADRB1	48.5488	-0.597956	0.330641	-1.80847	0.0705329	0.167998
ENSG00000044012	GUCA2B	3.57778	-0.0111882	1.11572	-0.0100278	0.991999	0.995813
ENSG00000044090	CUL7	914.797	0.285834	0.086215	3.31537	0.000915233	0.00418748
ENSG00000044115	CTNNA1	13324.7	0.0231893	0.0532688	0.435326	0.663326	0.811021
ENSG00000044446	PHKA2	657.813	0.15965	0.113023	1.41255	0.157788	0.309425
ENSG00000044459	CNTLN	617.108	0.00932914	0.111148	0.0839342	0.933109	0.967449
ENSG00000044524	EPHA3	0
ENSG00000044574	HSPA5	24678.2	-0.421889	0.0459823	-9.17502	4.51484e-20	1.22311e-18
ENSG00000046604	DSG2	6513.3	0.354911	0.0664838	5.33831	9.38187e-08	8.61997e-07
ENSG00000046647	GEMIN8	243.132	0.0565883	0.158464	0.357106	0.721013	0.847297
ENSG00000046651	OFD1	492.158	0.191514	0.11053	1.73269	0.0831514	0.190608
ENSG00000046653	GPM6B	1.36004	1.18256	2.36433	0.500169	0.616956
ENSG00000046774	MAGEC2	1.04355	-2.26319	2.61675	-0.864887	0.387101
ENSG00000046889	PREX2	1.25475	1.82922	2.22483	0.822186	0.410971
ENSG00000047056	WDR37	460.037	-0.00266827	0.140751	-0.0189574	0.984875	0.992874
ENSG00000047188	YTHDC2	1575.42	-0.155517	0.0782342	-1.98783	0.0468301	0.121471
ENSG00000047230	CTPS2	1038.72	0.00774825	0.0854735	0.0906509	0.92777	0.964724
ENSG00000047249	ATP6V1H	1560.52	-0.284446	0.0747331	-3.80616	0.00014114	0.000786857
ENSG00000047315	POLR2B	4933.89	-0.0810896	0.0586167	-1.38339	0.166546	0.321922
ENSG00000047346	FAM214A	532.417	-0.142269	0.140108	-1.01542	0.309904	0.50191
ENSG00000047365	ARAP2	132.728	1.18751	0.245645	4.83424	1.33653e-06	1.05283e-05
ENSG00000047410	TPR	5103.94	-0.00429333	0.059991	-0.0715661	0.942947	0.972123
ENSG00000047457	CP	359.814	-0.348346	0.144837	-2.40509	0.0161686	0.0505378
ENSG00000047578	KIAA0556	849.349	-0.0379077	0.100325	-0.377848	0.705544	0.838351
ENSG00000047579	DTNBP1	338.884	0.129866	0.137278	0.946011	0.344143	0.539065
ENSG00000047597	XK	246.123	1.42191	0.152864	9.30185	1.38025e-20	3.83798e-19
ENSG00000047617	ANO2	0.155593	1.01599	4.08047	0.248987	0.803371
ENSG00000047621	C12orf4	888.626	-0.0363697	0.0899064	-0.404528	0.685824	0.82466
ENSG00000047634	SCML1	380.974	0.0943557	0.122745	0.768713	0.442063	0.632767
ENSG00000047644	WWC3	2220.2	-0.00789623	0.0623663	-0.126611	0.899249	0.951049
ENSG00000047648	ARHGAP6	0.146803	-0.907567	4.08047	-0.222417	0.823989
ENSG00000047662	FAM184B	1.26846	3.80253	2.65135	1.43418	0.15152
ENSG00000047849	MAP4	9520.9	-0.274524	0.0503226	-5.45529	4.88943e-08	4.67173e-07
ENSG00000047932	GOPC	1791.26	0.210554	0.0718012	2.93245	0.00336297	0.0132126
ENSG00000047936	ROS1	17.6589	2.20061	0.630791	3.48866	0.000485455	0.0023804
ENSG00000048028	USP28	1192.87	0.0340722	0.0952001	0.357901	0.720417	0.846879
ENSG00000048052	HDAC9	39.3499	0.264806	0.393673	0.672656	0.501166	0.685885
ENSG00000048140	TSPAN17	3046.96	0.302784	0.0545025	5.55541	2.76954e-08	2.72877e-07
ENSG00000048162	NOP16	2272.18	0.178225	0.0752984	2.36692	0.017937	0.0550306
ENSG00000048342	CC2D2A	793.834	-0.374173	0.113671	-3.29172	0.000995752	0.00452573
ENSG00000048392	RRM2B	2256.16	-0.0644435	0.080569	-0.799854	0.423795	0.615487
ENSG00000048405	ZNF800	512.313	0.0841315	0.133525	0.630081	0.528641	0.708374
ENSG00000048462	TNFRSF17	0
ENSG00000048471	SNX29	388.105	0.11562	0.118462	0.976014	0.329057	0.523429
ENSG00000048540	LMO3	0.155593	1.01599	4.08047	0.248987	0.803371
ENSG00000048544	MRPS10	1561.73	0.0311066	0.068646	0.453145	0.650444	0.801209
ENSG00000048545	GUCA1A	0
ENSG00000048649	RSF1	1270.56	-0.557534	0.118769	-4.69427	2.67557e-06	2.0018e-05
ENSG00000048707	VPS13D	1205.45	0.307993	0.125808	2.44813	0.01436	0.045865
ENSG00000048740	CELF2	3.01058	-0.789931	1.42003	-0.556278	0.578021	0.748761
ENSG00000048828	FAM120A	7724.41	-0.338645	0.0699606	-4.8405	1.2951e-06	1.0207e-05
ENSG00000048991	R3HDM1	1730.39	-0.421504	0.0812487	-5.18782	2.12765e-07	1.85351e-06
ENSG00000049089	COL9A2	2.74175	-0.256984	1.50528	-0.170722	0.864442	0.932773
ENSG00000049130	KITLG	1001.97	-0.734858	0.0959508	-7.6587	1.87827e-14	3.37106e-13
ENSG00000049167	ERCC8	449.174	-0.362617	0.129858	-2.79242	0.00523155	0.019366
ENSG00000049192	ADAMTS6	7.05827	0.115318	0.916829	0.125779	0.899907	0.951092
ENSG00000049239	H6PD	979.54	-0.0679615	0.101889	-0.667012	0.504764	0.688688
ENSG00000049245	VAMP3	2765.28	0.100384	0.0584211	1.71829	0.0857441	0.194911
ENSG00000049246	PER3	167.52	0.130972	0.235334	0.556539	0.577842	0.748693
ENSG00000049247	UTS2	0
ENSG00000049249	TNFRSF9	72.0075	-1.54837	0.417184	-3.71148	0.000206054	0.00110705
ENSG00000049283	EPN3	6.71289	1.26003	0.961474	1.31052	0.190021	0.354542
ENSG00000049323	LTBP1	1251.82	-0.252189	0.0872529	-2.89032	0.00384851	0.0148869
ENSG00000049449	RCN1	10879	-0.0912951	0.0466186	-1.95834	0.0501901	0.128144
ENSG00000049540	ELN	81.4249	2.6034	0.411126	6.33238	2.41412e-10	3.05273e-09
ENSG00000049541	RFC2	2204.12	0.299735	0.0773162	3.87675	0.000105862	0.000605793
ENSG00000049618	ARID1B	1743.18	0.135081	0.12244	1.10324	0.269925	0.457498
ENSG00000049656	CLPTM1L	5733.59	0.0124842	0.0715227	0.174548	0.861435	0.931072
ENSG00000049759	NEDD4L	1735	0.0261802	0.0820325	0.319144	0.749618	0.866628
ENSG00000049768	FOXP3	10.1422	0.583613	0.695322	0.839341	0.401278	0.59493
ENSG00000049769	PPP1R3F	238.147	0.0144256	0.202882	0.0711037	0.943315	0.972253
ENSG00000049860	HEXB	5078.07	-0.0574012	0.0565391	-1.01525	0.309987	0.50191
ENSG00000049883	PTCD2	633.83	-0.619112	0.112998	-5.47897	4.27797e-08	4.11238e-07
ENSG00000050030	NEXMIF	5.81674	1.45725	0.963129	1.51304	0.13027	0.268146
ENSG00000050130	JKAMP	3140.76	0.110779	0.0635639	1.74279	0.0813697	0.187367
ENSG00000050165	DKK3	1008.43	0.57615	0.0859306	6.70483	2.01639e-11	2.79359e-10
ENSG00000050327	ARHGEF5	219.487	1.51996	0.171618	8.85663	8.24681e-19	2.05766e-17
ENSG00000050344	NFE2L3	611.274	-0.247887	0.114766	-2.15993	0.0307781	0.0858245
ENSG00000050393	MCUR1	1090.94	-0.0425218	0.113966	-0.373111	0.709066	0.840512
ENSG00000050405	LIMA1	493.356	0.487313	0.118211	4.1224	3.74938e-05	0.000234062
ENSG00000050426	LETMD1	538.465	-0.377025	0.117721	-3.2027	0.00136144	0.00598293
ENSG00000050438	SLC4A8	194.98	-0.0277154	0.25177	-0.110082	0.912344	0.957382
ENSG00000050555	LAMC3	103.71	-1.05644	0.311178	-3.39497	0.000686354	0.00323012
ENSG00000050628	PTGER3	0
ENSG00000050730	TNIP3	12.9851	-1.04481	0.717467	-1.45625	0.145323	0.290487
ENSG00000050748	MAPK9	1880	0.371975	0.0712838	5.21823	1.80641e-07	1.59477e-06
ENSG00000050767	COL23A1	0.157045	1.01599	4.08047	0.248987	0.803371
ENSG00000050820	BCAR1	2474	0.211656	0.0841177	2.51619	0.0118631	0.0390344
ENSG00000051009	FAM160A2	840.258	-0.204929	0.116744	-1.75537	0.0791957	0.183564
ENSG00000051108	HERPUD1	1988.3	-0.33142	0.111633	-2.96884	0.00298925	0.0119525
ENSG00000051128	HOMER3	683.866	-0.0874339	0.118697	-0.736615	0.461357	0.65015
ENSG00000051180	RAD51	686.859	0.131561	0.102913	1.27837	0.201118	0.368843
ENSG00000051341	POLQ	1268.35	0.00965897	0.0787336	0.122679	0.902361	0.952539
ENSG00000051382	PIK3CB	1585.1	0.167819	0.0922686	1.81881	0.0689412	0.164853
ENSG00000051523	CYBA	4186.88	0.713816	0.088893	8.03005	9.74339e-16	1.94302e-14
ENSG00000051596	THOC3	1651.62	0.446518	0.06741	6.62391	3.49821e-11	4.71825e-10
ENSG00000051620	HEBP2	865.518	0.210271	0.0942485	2.23103	0.0256794	0.0736614
ENSG00000051825	MPHOSPH9	1207.73	-0.0641379	0.107915	-0.594339	0.552285	0.72787
ENSG00000052126	PLEKHA5	720.865	0.478009	0.100397	4.76121	1.92438e-06	1.48262e-05
ENSG00000052344	PRSS8	1.52711	1.93484	2.24372	0.862336	0.388503
ENSG00000052723	SIKE1	533.105	0.117169	0.176895	0.662363	0.507738	0.691193
ENSG00000052749	RRP12	3184.01	-0.212206	0.0557094	-3.80916	0.000139439	0.000778749
ENSG00000052795	FNIP2	402.09	-0.0497878	0.14087	-0.353432	0.723765	0.849015
ENSG00000052802	MSMO1	3543.81	-0.18544	0.060012	-3.09004	0.00200126	0.00840936
ENSG00000052841	TTC17	2673.52	0.211628	0.0636737	3.32364	0.00088852	0.00407589
ENSG00000052850	ALX4	90.6871	-2.23749	0.276412	-8.09477	5.73734e-16	1.16923e-14
ENSG00000053108	FSTL4	126.767	-0.511146	0.243985	-2.09499	0.0361718	0.0979975
ENSG00000053254	FOXN3	750.268	0.0560879	0.135238	0.414735	0.678336	0.819963
ENSG00000053328	METTL24	0
ENSG00000053371	AKR7A2	1300.12	0.181754	0.100655	1.80572	0.0709626	0.168716
ENSG00000053372	MRTO4	3210.02	-0.102265	0.0643617	-1.58892	0.112079	0.239084
ENSG00000053438	NNAT	0
ENSG00000053501	USE1	235.75	-0.129029	0.156918	-0.822268	0.410925	0.603657
ENSG00000053524	MCF2L2	21.4049	0.157896	0.597919	0.264076	0.791722	0.892856
ENSG00000053702	NRIP2	0
ENSG00000053747	LAMA3	1926.7	-0.985799	0.0848149	-11.6229	3.1507e-31	1.48989e-29
ENSG00000053770	AP5M1	1327.4	0.0435173	0.0833139	0.522329	0.601441	0.767361
ENSG00000053900	ANAPC4	542.986	0.00243697	0.11303	0.0215603	0.982799	0.991588
ENSG00000053918	KCNQ1	21.8171	1.60067	0.552416	2.89757	0.0037606	0.0145898
ENSG00000054116	TRAPPC3	1721.35	0.0209634	0.0772835	0.271254	0.786196	0.889482
ENSG00000054118	THRAP3	5307.4	0.0216779	0.0536103	0.404361	0.685947	0.82471
ENSG00000054148	PHPT1	2852.94	-0.788428	0.0819163	-9.6248	6.2827e-22	1.87934e-20
ENSG00000054179	ENTPD2	14.7817	0.290114	0.595991	0.486776	0.626417	0.785272
ENSG00000054219	LY75	8.67582	-0.991528	0.851776	-1.16407	0.244395	0.424826
ENSG00000054267	ARID4B	1593.39	-0.0222957	0.0781166	-0.285416	0.775326	0.881732
ENSG00000054277	OPN3	1845.44	0.374662	0.0699984	5.35244	8.67781e-08	8.01037e-07
ENSG00000054282	SDCCAG8	348.497	-0.146307	0.143724	-1.01797	0.308692	0.500512
ENSG00000054356	PTPRN	9.32379	-0.966095	0.760384	-1.27053	0.203894	0.372807
ENSG00000054392	HHAT	275.611	-0.0876535	0.142242	-0.616229	0.537743	0.716114
ENSG00000054523	KIF1B	1973.47	0.000611669	0.101885	0.00600351	0.99521	0.997673
ENSG00000054598	FOXC1	310.635	0.413722	0.139753	2.96039	0.0030725	0.0122319
ENSG00000054611	TBC1D22A	885.155	0.419083	0.083821	4.99974	5.74089e-07	4.73234e-06
ENSG00000054654	SYNE2	1449.3	0.362543	0.0878391	4.12736	3.66958e-05	0.000229443
ENSG00000054690	PLEKHH1	158.615	0.501931	0.219766	2.28394	0.022375	0.0657717
ENSG00000054793	ATP9A	2520.81	0.0363472	0.0969272	0.374995	0.707664	0.83967
ENSG00000054796	SPO11	0
ENSG00000054803	CBLN4	0
ENSG00000054938	CHRDL2	6.91471	-5.11917	1.44368	-3.54591	0.000391264	0.00196741
ENSG00000054965	FAM168A	1920.72	-0.0272379	0.0912309	-0.29856	0.765276	0.876679
ENSG00000054967	RELT	411.275	0.194938	0.123716	1.57569	0.115097	0.243992
ENSG00000054983	GALC	1508.32	0.07173	0.0858597	0.835432	0.403474	0.596897
ENSG00000055044	NOP58	4086.68	-0.498566	0.0550701	-9.05331	1.38696e-19	3.65093e-18
ENSG00000055070	SZRD1	6030.03	0.111065	0.064569	1.72009	0.0854155	0.1945
ENSG00000055118	KCNH2	55.6076	0.0525387	0.328813	0.159783	0.873052	0.936752
ENSG00000055130	CUL1	3257.55	-0.218844	0.0525999	-4.16055	3.17482e-05	0.000201055
ENSG00000055147	FAM114A2	718.458	-0.0747712	0.102959	-0.726225	0.467701	0.656144
ENSG00000055163	CYFIP2	3473.49	0.244907	0.0670449	3.65289	0.000259308	0.00135793
ENSG00000055208	TAB2	2051.63	0.259955	0.0643463	4.03994	5.34641e-05	0.000324899
ENSG00000055211	GINM1	1200.41	0.0652449	0.0755848	0.863202	0.388026	0.582556
ENSG00000055332	EIF2AK2	8197.16	-0.300286	0.0841626	-3.56793	0.000359807	0.00182316
ENSG00000055483	USP36	2605.1	-0.397166	0.069422	-5.72103	1.05879e-08	1.1038e-07
ENSG00000055609	KMT2C	1335.22	0.263931	0.113466	2.32607	0.0200146	0.0600286
ENSG00000055732	MCOLN3	237.645	0.603038	0.171293	3.52051	0.000430711	0.00213718
ENSG00000055813	CCDC85A	98.0017	2.79383	0.268265	10.4144	2.13047e-25	7.73533e-24
ENSG00000055917	PUM2	4123.86	-0.325106	0.0834608	-3.89531	9.80714e-05	0.000565306
ENSG00000055950	MRPL43	1930.16	0.263433	0.0782768	3.3654	0.000764333	0.00355683
ENSG00000055955	ITIH4	3.22604	1.84679	1.4379	1.28437	0.199014	0.366688
ENSG00000055957	ITIH1	0
ENSG00000056050	HPF1	650.133	0.019952	0.0986283	0.202295	0.839686	0.917849
ENSG00000056097	ZFR	5031.69	-0.183213	0.0643448	-2.84736	0.00440837	0.0167531
ENSG00000056277	ZNF280C	326.904	-0.361707	0.148752	-2.4316	0.0150321	0.0475595
ENSG00000056291	NPFFR2	3.33913	3.59967	1.59102	2.26249	0.0236672	0.0689414
ENSG00000056487	PHF21B	25.5462	0.942921	0.485338	1.94282	0.0520384	0.131947
ENSG00000056558	TRAF1	80.2756	-1.86701	0.267922	-6.9685	3.20335e-12	4.79561e-11
ENSG00000056586	RC3H2	2061.09	-0.315132	0.112282	-2.80662	0.00500642	0.0186401
ENSG00000056736	IL17RB	46.4105	0.683982	0.352024	1.943	0.0520164	0.131912
ENSG00000056972	TRAF3IP2	504.457	0.127073	0.120885	1.05119	0.293173	0.482733
ENSG00000056998	GYG2	507.047	0.115901	0.103816	1.11641	0.264247	0.450024
ENSG00000057019	DCBLD2	54909.5	0.872804	0.0530462	16.4537	7.89546e-61	1.00565e-58
ENSG00000057149	SERPINB3	1.32294	0.106354	1.7676	0.0601684	0.952021
ENSG00000057252	SOAT1	2781.34	-0.265768	0.087991	-3.0204	0.00252444	0.0103293
ENSG00000057294	PKP2	796.215	1.40497	0.0976003	14.3951	5.55534e-47	4.71726e-45
ENSG00000057468	MSH4	0
ENSG00000057593	F7	8.70484	0.69444	0.7762	0.894666	0.370966	0.566418
ENSG00000057608	GDI2	11662.3	0.0404876	0.0507071	0.798461	0.424603	0.616377
ENSG00000057657	PRDM1	103.389	-4.17926	0.327836	-12.748	3.19783e-37	1.95006e-35
ENSG00000057663	ATG5	1071.51	-0.189867	0.0846568	-2.24278	0.0249107	0.0718611
ENSG00000057704	TMCC3	32.6713	-0.431052	0.379123	-1.13697	0.25555	0.43939
ENSG00000057757	PITHD1	774.964	-0.184328	0.0914518	-2.01558	0.0438441	0.115259
ENSG00000057935	MTA3	1492.74	-0.134961	0.0716681	-1.88314	0.0596818	0.147329
ENSG00000058056	USP13	1195.06	0.221935	0.116224	1.90955	0.0561912	0.140402
ENSG00000058063	ATP11B	1064.04	0.0196459	0.087428	0.22471	0.822205	0.908368
ENSG00000058085	LAMC2	2099.96	0.0215385	0.0807042	0.266882	0.78956	0.891883
ENSG00000058091	CDK14	148.324	5.77354	0.402889	14.3303	1.41433e-46	1.16343e-44
ENSG00000058262	SEC61A1	11364.5	0.234624	0.0443969	5.2847	1.2591e-07	1.13635e-06
ENSG00000058272	PPP1R12A	2036.81	-0.049921	0.107749	-0.463308	0.643144	0.795952
ENSG00000058335	RASGRF1	14.3679	-0.429287	0.620233	-0.692138	0.488851	0.675114
ENSG00000058404	CAMK2B	10.8689	0.323572	0.672749	0.480971	0.630537	0.788122
ENSG00000058453	CROCC	199.781	0.551448	0.189841	2.90478	0.00367508	0.0142931
ENSG00000058600	POLR3E	1354.15	-0.0712492	0.093195	-0.764518	0.444559	0.634957
ENSG00000058668	ATP2B4	1364.2	-0.130943	0.0703484	-1.86135	0.0626953	0.153069
ENSG00000058673	ZC3H11A	3123.59	0.0173222	0.0695429	0.249086	0.803294	0.89987
ENSG00000058729	RIOK2	900.118	-0.107357	0.290147	-0.37001	0.711375	0.841871
ENSG00000058799	YIPF1	610.316	0.00274008	0.107726	0.0254358	0.979707	0.990142
ENSG00000058804	NDC1	3267.84	0.142084	0.061303	2.31774	0.0204636	0.0611661
ENSG00000058866	DGKG	738.599	-0.162261	0.11919	-1.36136	0.1734	0.33144
ENSG00000059122	FLYWCH1	1194.01	-0.222055	0.11852	-1.87356	0.0609908	0.149536
ENSG00000059145	UNKL	1112.07	-0.0836202	0.0766479	-1.09096	0.275289	0.463628
ENSG00000059377	TBXAS1	306.943	0.365474	0.170316	2.14586	0.031884	0.0882693
ENSG00000059378	PARP12	1571.29	-0.215857	0.0672264	-3.2109	0.00132321	0.00582914
ENSG00000059573	ALDH18A1	3392.63	-0.000171991	0.0600515	-0.00286405	0.997715	0.999015
ENSG00000059588	TARBP1	1491.01	0.384937	0.078009	4.93452	8.03464e-07	6.49101e-06
ENSG00000059691	GATB	696.948	-0.198046	0.0936264	-2.11528	0.0344058	0.0939659
ENSG00000059728	MXD1	132.961	-0.951089	0.229547	-4.14332	3.42307e-05	0.000214796
ENSG00000059758	CDK17	793.836	-0.152531	0.0952969	-1.60058	0.109469	0.234531
ENSG00000059769	DNAJC25	268.533	-0.678986	0.148954	-4.55837	5.1553e-06	3.71116e-05
ENSG00000059804	SLC2A3	2789.1	1.86905	0.119293	15.6677	2.51366e-55	2.73798e-53
ENSG00000059915	PSD	7.16646	0.157351	0.984334	0.159855	0.872995	0.936752
ENSG00000060069	CTDP1	860.265	0.0538602	0.0887988	0.606542	0.544155	0.721247
ENSG00000060138	YBX3	5348.41	-0.263861	0.0645258	-4.08923	4.32799e-05	0.000267853
ENSG00000060140	STYK1	23.9251	0.612248	0.615913	0.99405	0.320199	0.51388
ENSG00000060237	WNK1	9771.48	-0.13516	0.0901119	-1.49991	0.133637	0.27333
ENSG00000060303	RPS17P5	0
ENSG00000060339	CCAR1	4115.59	0.079128	0.0846879	0.934348	0.350124	0.545083
ENSG00000060491	OGFR	1828.78	0.0551158	0.0768568	0.717124	0.473298	0.661235
ENSG00000060558	GNA15	2.21102	-1.30317	1.52194	-0.856258	0.391855
ENSG00000060566	CREB3L3	5.85892	-0.757207	0.943152	-0.802847	0.422063	0.614214
ENSG00000060642	PIGV	530.324	-0.0153455	0.107182	-0.143172	0.886154	0.943912
ENSG00000060656	PTPRU	894.05	0.375732	0.100882	3.72447	0.000195722	0.00105683
ENSG00000060688	SNRNP40	1458.05	-0.16353	0.0914597	-1.788	0.0737758	0.173705
ENSG00000060709	RIMBP2	1.2639	2.58751	2.82026	0.91747	0.358896
ENSG00000060718	COL11A1	259.051	-2.91824	0.214629	-13.5967	4.19183e-42	2.98224e-40
ENSG00000060749	QSER1	3375.26	0.137317	0.0948829	1.44722	0.147834	0.294401
ENSG00000060762	MPC1	142.97	0.499617	0.185435	2.69429	0.0070538	0.0250354
ENSG00000060971	ACAA1	1466.26	-0.194431	0.0875246	-2.22145	0.0263207	0.0752279
ENSG00000060982	BCAT1	981.798	-2.94494	0.157567	-18.6901	5.96555e-78	1.13518e-75
ENSG00000061273	HDAC7	2252.14	-0.22342	0.0692438	-3.22657	0.00125283	0.00555042
ENSG00000061337	LZTS1	7.23195	1.43992	0.862595	1.66929	0.0950602	0.210631
ENSG00000061455	PRDM6	24.6449	3.04722	0.768314	3.96611	7.30538e-05	0.000431977
ENSG00000061492	WNT8A	0
ENSG00000061656	SPAG4	38.5704	0.222846	0.406413	0.548323	0.58347	0.752759
ENSG00000061676	NCKAP1	7666.13	-0.541477	0.0558098	-9.70219	2.95109e-22	8.99799e-21
ENSG00000061794	MRPS35	4187.52	-0.205056	0.0546419	-3.75272	0.000174929	0.000955006
ENSG00000061918	GUCY1B1	65.9633	1.30538	0.289318	4.51191	6.42451e-06	4.56655e-05
ENSG00000061936	SFSWAP	1264.46	-0.0346524	0.0726412	-0.477035	0.633337	0.789746
ENSG00000061938	TNK2	610.549	0.196775	0.100486	1.95824	0.0502017	0.128153
ENSG00000061987	MON2	1753.48	-0.202614	0.110473	-1.83406	0.0666447	0.160725
ENSG00000062038	CDH3	15.4891	1.44731	0.605361	2.39083	0.0168104	0.0521618
ENSG00000062096	ARSF	0
ENSG00000062194	GPBP1	2237.99	0.113021	0.061681	1.83234	0.0669008	0.16118
ENSG00000062282	DGAT2	137.26	-1.61768	0.215444	-7.50857	5.97749e-14	1.03746e-12
ENSG00000062370	ZNF112	98.8723	-0.764414	0.260138	-2.93849	0.00329811	0.0129998
ENSG00000062485	CS	9887.12	0.0657184	0.043721	1.50313	0.132805	0.272052
ENSG00000062524	LTK	1.33338	0.00226818	1.89518	0.00119682	0.999045
ENSG00000062582	MRPS24	2719	0.186956	0.0810912	2.3055	0.0211386	0.0627678
ENSG00000062598	ELMO2	1551.24	-0.0441466	0.088506	-0.498798	0.617922	0.779821
ENSG00000062650	WAPL	1403.78	-0.132833	0.0844219	-1.57345	0.115616	0.244941
ENSG00000062716	VMP1	7293.74	-0.00133298	0.050914	-0.026181	0.979113	0.989935
ENSG00000062725	APPBP2	1475.93	0.0927177	0.0951783	0.974147	0.329983	0.524427
ENSG00000062822	POLD1	2753.61	0.438155	0.060728	7.21505	5.39156e-13	8.67151e-12
ENSG00000063015	SEZ6	0
ENSG00000063046	EIF4B	20468	-0.0610419	0.0502938	-1.21371	0.22486	0.400686
ENSG00000063127	SLC6A16	23.5858	0.151913	0.528006	0.28771	0.773568	0.880975
ENSG00000063169	BICRA	512.591	0.0519368	0.11118	0.467142	0.640398	0.794224
ENSG00000063176	SPHK2	844.404	0.0997452	0.088711	1.12438	0.26085	0.445916
ENSG00000063177	RPL18	19971.4	-0.193553	0.0807666	-2.39645	0.0165546	0.0515096
ENSG00000063180	CA11	298.426	0.718723	0.162355	4.42687	9.561e-06	6.6057e-05
ENSG00000063241	ISOC2	1411.08	0.278002	0.0996161	2.79074	0.00525882	0.0194469
ENSG00000063244	U2AF2	16765.2	0.0970754	0.0539921	1.79795	0.0721844	0.171003
ENSG00000063245	EPN1	6400.37	0.36432	0.083363	4.37028	1.24085e-05	8.42925e-05
ENSG00000063322	MED29	4384.41	0.14551	0.0552671	2.63285	0.0084672	0.0291887
ENSG00000063438	AHRR	15.7396	-0.529171	0.564921	-0.936718	0.348904	0.54388
ENSG00000063515	GSC2	0
ENSG00000063587	ZNF275	446.996	-0.0348888	0.113865	-0.306405	0.759296	0.872754
ENSG00000063601	MTMR1	1489.25	0.29457	0.0858924	3.42953	0.000604636	0.0028912
ENSG00000063660	GPC1	8675.24	-0.852348	0.0786651	-10.8351	2.34608e-27	9.38074e-26
ENSG00000063761	ADCK1	326.76	0.33877	0.137511	2.46359	0.0137554	0.0442108
ENSG00000063854	HAGH	1572.46	0.276478	0.0822059	3.36324	0.000770342	0.00358283
ENSG00000063978	RNF4	2684.63	-0.0479068	0.0631811	-0.758246	0.448304	0.638793
ENSG00000064012	CASP8	1603.83	-0.479918	0.08338	-5.75579	8.62398e-09	9.12916e-08
ENSG00000064042	LIMCH1	3538.32	0.174619	0.0812878	2.14816	0.031701	0.0879075
ENSG00000064102	INTS13	1605.98	-0.126189	0.0717367	-1.75906	0.0785667	0.18239
ENSG00000064115	TM7SF3	5568.68	-0.0611679	0.06124	-0.998822	0.317881	0.511368
ENSG00000064195	DLX3	2.78972	-2.25812	1.66624	-1.35522	0.175349	0.334032
ENSG00000064199	SPA17	510.524	0.0722837	0.122049	0.592253	0.553681	0.728874
ENSG00000064201	TSPAN32	0
ENSG00000064205	CCN5	609.706	0.622055	0.129763	4.79379	1.63661e-06	1.27333e-05
ENSG00000064218	DMRT3	2.55034	3.89761	1.76587	2.20719	0.0273006	0.0776212
ENSG00000064225	ST3GAL6	46.6173	1.03642	0.400395	2.5885	0.00963949	0.0326288
ENSG00000064270	ATP2C2	16.9545	0.452276	0.614067	0.736525	0.461412	0.65015
ENSG00000064300	NGFR	14.3185	-0.0185889	0.584926	-0.0317799	0.974648	0.98738
ENSG00000064309	CDON	270.45	0.0403628	0.158067	0.255353	0.79845	0.897551
ENSG00000064313	TAF2	1621.64	-0.170539	0.0692231	-2.46362	0.0137543	0.0442108
ENSG00000064393	HIPK2	4140.18	0.00428225	0.116357	0.0368027	0.970642	0.985223
ENSG00000064419	TNPO3	4881.31	-0.0653171	0.0506395	-1.28984	0.197105	0.364102
ENSG00000064489	BORCS8-MEF2B	76.5359	-0.512736	0.314667	-1.62946	0.103216	0.224298
ENSG00000064490	RFXANK	663.309	0.0703221	0.0997633	0.704889	0.480879	0.668221
ENSG00000064545	TMEM161A	768.112	0.307194	0.117662	2.61082	0.00903251	0.0308653
ENSG00000064547	LPAR2	64.9677	1.0391	0.413121	2.51524	0.0118953	0.0391159
ENSG00000064601	CTSA	5214.41	-0.221684	0.0764159	-2.90101	0.00371958	0.0144448
ENSG00000064607	SUGP2	1865.29	-0.248352	0.0934176	-2.65851	0.0078487	0.0274253
ENSG00000064651	SLC12A2	4284.14	2.81421e-07	0.107428	2.61963e-06	0.999998	0.999998
ENSG00000064652	SNX24	516.861	-0.325276	0.129142	-2.51874	0.0117777	0.03881
ENSG00000064655	EYA2	239.642	0.519217	0.173401	2.99432	0.00275055	0.0111336
ENSG00000064666	CNN2	3015.93	0.516575	0.0660194	7.82459	5.09303e-15	9.65658e-14
ENSG00000064687	ABCA7	401.162	0.347425	0.143932	2.41381	0.0157868	0.0494912
ENSG00000064692	SNCAIP	1.45998	0.103996	2.04759	0.0507893	0.959493
ENSG00000064703	DDX20	697.894	-0.149939	0.0912314	-1.6435	0.10028	0.219823
ENSG00000064726	BTBD1	3602.68	-0.201982	0.0549129	-3.67822	0.000234864	0.0012452
ENSG00000064763	FAR2	34.1247	3.20596	0.589993	5.4339	5.51358e-08	5.23012e-07
ENSG00000064787	BCAS1	250.961	0.285804	0.182542	1.56569	0.117421	0.2479
ENSG00000064835	POU1F1	1.49747	1.22404	2.00377	0.610871	0.541285
ENSG00000064886	CHI3L2	0.647092	-0.904983	2.99778	-0.301885	0.76274
ENSG00000064932	SBNO2	1336.89	0.155896	0.49784	0.313145	0.754171	0.86938
ENSG00000064933	PMS1	517.089	-0.622812	0.119041	-5.23193	1.67747e-07	1.49094e-06
ENSG00000064961	HMG20B	917.762	-0.0313255	0.097158	-0.322418	0.747136	0.864767
ENSG00000064989	CALCRL	15.1298	-0.430456	0.714927	-0.602098	0.547109	0.723826
ENSG00000064995	TAF11	610.635	0.236364	0.100272	2.35722	0.0184124	0.0561507
ENSG00000064999	ANKS1A	767.542	-0.0308386	0.100575	-0.306624	0.75913	0.872746
ENSG00000065000	AP3D1	4971.59	0.014438	0.0626398	0.230492	0.817709	0.906627
ENSG00000065029	ZNF76	358.902	0.431166	0.127865	3.37205	0.000746118	0.00348233
ENSG00000065054	SLC9A3R2	1987.5	1.06092	0.0794041	13.361	1.02121e-40	7.01259e-39
ENSG00000065057	NTHL1	1186.28	0.296034	0.0837082	3.5365	0.000405464	0.00202976
ENSG00000065060	UHRF1BP1	1421.5	-0.312792	0.0871881	-3.58755	0.000333794	0.00170834
ENSG00000065135	GNAI3	3029.68	0.0248791	0.0590441	0.421365	0.673489	0.81698
ENSG00000065150	IPO5	7323.58	-0.175673	0.048145	-3.64884	0.000263431	0.00137678
ENSG00000065154	OAT	2236.35	-0.341403	0.0630748	-5.41266	6.20953e-08	5.86212e-07
ENSG00000065183	WDR3	2522.02	-0.151486	0.0693198	-2.18532	0.028865	0.0812956
ENSG00000065243	PKN2	1722.95	-0.0652451	0.0982035	-0.664387	0.506443	0.690036
ENSG00000065268	WDR18	1156.58	0.274431	0.0905462	3.03084	0.00243874	0.0100332
ENSG00000065308	TRAM2	2343.36	-0.125734	0.0703884	-1.78628	0.0740536	0.174229
ENSG00000065320	NTN1	43.4504	0.770573	0.434847	1.77206	0.0763849	0.178518
ENSG00000065325	GLP2R	651.714	-0.492036	0.145098	-3.39106	0.000696222	0.00327071
ENSG00000065328	MCM10	2210.48	0.153943	0.0712348	2.16106	0.0306904	0.0856577
ENSG00000065357	DGKA	434.95	-0.31991	0.122455	-2.61246	0.00898922	0.030744
ENSG00000065361	ERBB3	174.685	0.235101	0.270132	0.870321	0.384125	0.578734
ENSG00000065371	ROPN1	0
ENSG00000065413	ANKRD44	120.265	-0.428927	0.238145	-1.80112	0.0716845	0.170049
ENSG00000065427	KARS1	7657.33	-0.188992	0.0590169	-3.20233	0.00136321	0.00598901
ENSG00000065457	ADAT1	1080.21	0.116304	0.0790451	1.47136	0.141194	0.284259
ENSG00000065485	PDIA5	772.048	0.455761	0.0955642	4.76916	1.84999e-06	1.42739e-05
ENSG00000065491	TBC1D22B	462.556	-0.142505	0.108707	-1.31091	0.189888	0.354377
ENSG00000065518	NDUFB4	2908.89	0.0978651	0.0600731	1.6291	0.103292	0.224401
ENSG00000065526	SPEN	2912.2	-0.0498217	0.0683652	-0.728758	0.466149	0.654521
ENSG00000065534	MYLK	3231.99	0.588526	0.101435	5.80199	6.55313e-09	7.05523e-08
ENSG00000065548	ZC3H15	3186.8	-0.466967	0.0555884	-8.40045	4.44776e-17	9.85243e-16
ENSG00000065559	MAP2K4	2412.5	0.0930986	0.0690987	1.34733	0.177874	0.33752
ENSG00000065600	PACC1	592.634	-0.061488	0.128446	-0.478707	0.632147	0.789072
ENSG00000065609	SNAP91	60.1014	0.778136	0.411551	1.89074	0.0586591	0.145236
ENSG00000065613	SLK	3513	0.0843932	0.0754118	1.1191	0.263098	0.448647
ENSG00000065615	CYB5R4	1217.83	-0.0278265	0.0903105	-0.308121	0.757991	0.872261
ENSG00000065618	COL17A1	37.9453	-1.07379	0.48858	-2.19778	0.0279649	0.0791822
ENSG00000065621	GSTO2	53.9636	0.508803	0.365308	1.39281	0.163679	0.317897
ENSG00000065665	SEC61A2	624.672	0.0882755	0.105939	0.833269	0.404693	0.597385
ENSG00000065675	PRKCQ	392.402	0.24933	0.117821	2.11616	0.0343308	0.0938748
ENSG00000065717	TLE2	117.055	1.32245	0.221768	5.96321	2.47337e-09	2.79231e-08
ENSG00000065802	ASB1	1152.45	0.102335	0.0975491	1.04906	0.294151	0.483687
ENSG00000065809	FAM107B	7339.97	-0.14357	0.0745884	-1.92484	0.05425	0.136544
ENSG00000065833	ME1	4969.15	-0.177962	0.0498228	-3.5719	0.000354405	0.00180041
ENSG00000065882	TBC1D1	1306.23	0.273866	0.0886134	3.09057	0.00199771	0.00840037
ENSG00000065883	CDK13	1597.91	0.28112	0.077374	3.63326	0.000279862	0.00145543
ENSG00000065911	MTHFD2	7269.06	-1.19203	0.0625738	-19.0499	6.57871e-81	1.36716e-78
ENSG00000065923	SLC9A7	1382.74	-0.360887	0.110496	-3.26607	0.00109053	0.00491687
ENSG00000065970	FOXJ2	1100.37	0.10698	0.0922497	1.15968	0.24618	0.426924
ENSG00000065978	YBX1	24968	-0.0684728	0.0643817	-1.06354	0.287535	0.477395
ENSG00000065989	PDE4A	139.2	-1.72273	0.244658	-7.0414	1.90315e-12	2.89301e-11
ENSG00000066027	PPP2R5A	1338.6	-0.011027	0.0713587	-0.154529	0.877192	0.938389
ENSG00000066032	CTNNA2	8.96482	-0.21136	0.920132	-0.229706	0.81832	0.907049
ENSG00000066044	ELAVL1	3786.38	0.149208	0.0639968	2.33149	0.0197274	0.0594208
ENSG00000066056	TIE1	3.06778	-0.0818953	1.24487	-0.0657863	0.947548	0.974391
ENSG00000066084	DIP2B	2445.41	-0.280353	0.0794736	-3.52763	0.000419304	0.00208729
ENSG00000066117	SMARCD1	2470.74	-0.162216	0.0620796	-2.61304	0.0089741	0.0307056
ENSG00000066135	KDM4A	1550.95	-0.282622	0.0689764	-4.09738	4.17861e-05	0.000259524
ENSG00000066136	NFYC	1581.27	0.0601051	0.089399	0.672324	0.501377	0.686004
ENSG00000066185	ZMYND12	14.9976	2.20179	0.748426	2.94189	0.00326212	0.0128807
ENSG00000066230	SLC9A3	506.617	-0.0536636	0.109928	-0.488171	0.625429	0.784741
ENSG00000066248	NGEF	393.266	-0.279663	0.131481	-2.12703	0.0334179	0.0916962
ENSG00000066279	ASPM	2746.61	0.12904	0.0942882	1.36857	0.171132	0.328523
ENSG00000066294	CD84	2.37464	3.66088	1.79091	2.04414	0.0409396	0.108764
ENSG00000066322	ELOVL1	4627.03	0.109983	0.0604391	1.81973	0.0688008	0.164567
ENSG00000066336	SPI1	0.400911	2.12245	4.02081	0.527865	0.597593
ENSG00000066379	ZNRD1	53.2667	0.149701	0.319776	0.468144	0.639682	0.793871
ENSG00000066382	MPPED2	2.62219	2.10194	1.64972	1.27412	0.202621	0.370866
ENSG00000066405	CLDN18	0
ENSG00000066422	ZBTB11	1248.88	-0.271047	0.0901897	-3.0053	0.00265322	0.0107919
ENSG00000066427	ATXN3	535.733	-0.0921153	0.106686	-0.863428	0.387902	0.58248
ENSG00000066455	GOLGA5	1541.39	0.0984584	0.0758485	1.29809	0.194255	0.360352
ENSG00000066468	FGFR2	112.038	3.26294	0.284223	11.4802	1.65921e-30	7.46598e-29
ENSG00000066557	LRRC40	703.486	0.0753685	0.0964129	0.781726	0.434376	0.624877
ENSG00000066583	ISOC1	962.41	0.468979	0.0815159	5.75322	8.75606e-09	9.25658e-08
ENSG00000066629	EML1	1791.7	-0.191372	0.0836394	-2.28806	0.022134	0.0651603
ENSG00000066651	TRMT11	462.168	-0.41004	0.111576	-3.67499	0.00023786	0.00125939
ENSG00000066654	THUMPD1	1850.93	-0.0152253	0.0678702	-0.22433	0.822501	0.908368
ENSG00000066697	MSANTD3	1518.69	-0.714737	0.0829501	-8.61646	6.90538e-18	1.61815e-16
ENSG00000066735	KIF26A	218.3	0.272656	0.163454	1.66809	0.0952984	0.21113
ENSG00000066739	ATG2B	1242.42	0.0512805	0.136137	0.376683	0.706409	0.838937
ENSG00000066777	ARFGEF1	2409.51	0.163467	0.0605268	2.70074	0.00691858	0.0246275
ENSG00000066813	ACSM2B	0.522765	-0.959158	3.23961	-0.296072	0.767175
ENSG00000066827	ZFAT	385.389	-0.215802	0.133744	-1.61355	0.106625	0.229935
ENSG00000066855	MTFR1	1653.69	-0.0842028	0.0913082	-0.922182	0.356434	0.551481
ENSG00000066923	STAG3	22.5356	0.509114	0.490723	1.03748	0.299514	0.489697
ENSG00000066926	FECH	1675.94	0.0294294	0.0795467	0.369964	0.711409	0.841871
ENSG00000066933	MYO9A	1475.97	-0.0825132	0.109183	-0.755734	0.449809	0.64025
ENSG00000067048	DDX3Y	2027.57	-0.0042185	0.102056	-0.0413352	0.967029	0.983533
ENSG00000067057	PFKP	20524.9	0.124379	0.0517714	2.40246	0.016285	0.0508412
ENSG00000067064	IDI1	5352.28	-0.307445	0.0531483	-5.78466	7.26571e-09	7.77471e-08
ENSG00000067066	SP100	1940.34	-0.924032	0.0656612	-14.0727	5.58734e-45	4.34712e-43
ENSG00000067082	KLF6	2614.62	0.228404	0.060249	3.791	0.000150041	0.000829452
ENSG00000067113	PLPP1	1084.85	0.198639	0.0851892	2.33174	0.0197143	0.0593985
ENSG00000067141	NEO1	4685.25	0.0732148	0.0605634	1.2089	0.226703	0.402973
ENSG00000067167	TRAM1	25219.7	0.65338	0.0431437	15.1443	8.26808e-52	8.11093e-50
ENSG00000067177	PHKA1	2367.32	-0.313944	0.0654975	-4.79321	1.64132e-06	1.27593e-05
ENSG00000067182	TNFRSF1A	13505.4	-0.217382	0.0580503	-3.74472	0.000180593	0.000983546
ENSG00000067191	CACNB1	205.526	-0.346704	0.171505	-2.02153	0.0432244	0.113819
ENSG00000067208	EVI5	507.306	-0.292991	0.166369	-1.76109	0.0782229	0.181882
ENSG00000067221	STOML1	307.304	0.0440316	0.1329	0.331315	0.740407	0.861118
ENSG00000067225	PKM	222486	-0.0635146	0.0511731	-1.24117	0.214542	0.387211
ENSG00000067248	DHX29	2331.89	-0.0850082	0.0693418	-1.22593	0.220225	0.394985
ENSG00000067334	DNTTIP2	2210.89	-0.233978	0.0716125	-3.26729	0.00108583	0.00490108
ENSG00000067365	METTL22	424.71	-0.0936844	0.130625	-0.717203	0.473249	0.661226
ENSG00000067369	TP53BP1	2505.64	0.152439	0.0757211	2.01317	0.0440971	0.11577
ENSG00000067445	TRO	66.2814	2.44958	0.371836	6.5878	4.46397e-11	5.9497e-10
ENSG00000067533	RRP15	1405.52	-0.211803	0.0944023	-2.24362	0.0248566	0.0717183
ENSG00000067560	RHOA	14513.9	-0.0888097	0.050488	-1.75903	0.078573	0.18239
ENSG00000067596	DHX8	3384.44	-0.143461	0.0682503	-2.10198	0.0355552	0.0965707
ENSG00000067601	PMS2P4	67.26	-0.227364	0.296989	-0.765565	0.443935	0.634252
ENSG00000067606	PRKCZ	467.722	0.353043	0.112907	3.12685	0.00176688	0.00755445
ENSG00000067646	ZFY	270.089	-0.247302	0.138998	-1.77918	0.0752104	0.17619
ENSG00000067704	IARS2	7826.42	-0.0148047	0.0514213	-0.28791	0.773416	0.880955
ENSG00000067715	SYT1	1430.88	0.1634	0.0764105	2.13845	0.0324801	0.089621
ENSG00000067798	NAV3	957.563	0.245552	0.123659	1.98572	0.0470641	0.12187
ENSG00000067829	IDH3G	1751.8	0.250347	0.0755687	3.31284	0.000923533	0.00422301
ENSG00000067836	ROGDI	310.475	0.382582	0.146859	2.6051	0.00918466	0.0313112
ENSG00000067840	PDZD4	168.481	1.11829	0.207086	5.40013	6.65909e-08	6.26407e-07
ENSG00000067842	ATP2B3	2.19132	1.78618	1.942	0.919767	0.357695
ENSG00000067900	ROCK1	2557.12	0.0989486	0.094435	1.04779	0.294733	0.484243
ENSG00000067955	CBFB	1556.05	-0.00732236	0.0845075	-0.0866475	0.930952	0.966125
ENSG00000067992	PDK3	821.03	0.0481805	0.106242	0.453497	0.650191	0.80104
ENSG00000068001	HYAL2	1267.97	0.306255	0.0773515	3.95926	7.51809e-05	0.000442073
ENSG00000068024	HDAC4	642.145	-0.410179	0.1043	-3.9327	8.39963e-05	0.000490076
ENSG00000068028	RASSF1	309.497	0.021569	0.150845	0.142988	0.8863	0.943912
ENSG00000068078	FGFR3	154.709	1.16145	0.197522	5.88013	4.09935e-09	4.50973e-08
ENSG00000068079	IFI35	4710.89	0.0380388	0.0693668	0.548371	0.583437	0.752759
ENSG00000068097	HEATR6	1490.43	-0.133318	0.0797513	-1.67167	0.09459	0.209796
ENSG00000068120	COASY	4835.83	-0.247944	0.060702	-4.0846	4.41527e-05	0.000272549
ENSG00000068137	PLEKHH3	683.483	-0.20483	0.0914651	-2.23943	0.0251277	0.0724078
ENSG00000068305	MEF2A	1117.16	-0.243086	0.116631	-2.08423	0.0371397	0.100145
ENSG00000068308	OTUD5	2888.45	0.146315	0.0650873	2.24798	0.0245773	0.0710421
ENSG00000068323	TFE3	3919.38	-0.0481408	0.0521413	-0.923276	0.355864	0.551138
ENSG00000068354	TBC1D25	615.452	0.183518	0.106727	1.71952	0.0855203	0.194618
ENSG00000068366	ACSL4	3241.68	0.0935315	0.0613796	1.52382	0.127553	0.263861
ENSG00000068383	INPP5A	727.872	-0.251116	0.0992373	-2.53046	0.0113913	0.0377259
ENSG00000068394	GPKOW	1199.89	0.249582	0.0769993	3.24135	0.00118963	0.00531514
ENSG00000068400	GRIPAP1	1525.32	0.0995326	0.0729951	1.36355	0.172709	0.330558
ENSG00000068438	FTSJ1	1730.02	0.172135	0.0650139	2.64766	0.00810503	0.0281404
ENSG00000068489	PRR11	3348.69	0.250604	0.0843136	2.97228	0.00295595	0.0118463
ENSG00000068615	REEP1	59.2803	-0.255129	0.319352	-0.798893	0.424352	0.616158
ENSG00000068650	ATP11A	1575.06	0.286609	0.121474	2.35942	0.0183034	0.0558617
ENSG00000068654	POLR1A	4952.27	-0.259884	0.105374	-2.46631	0.0136513	0.0439748
ENSG00000068697	LAPTM4A	6289.73	-0.437728	0.0508678	-8.60521	7.61759e-18	1.77977e-16
ENSG00000068724	TTC7A	2107.48	-0.216179	0.0704894	-3.06683	0.00216341	0.00899891
ENSG00000068745	IP6K2	1137.05	-0.0724795	0.0834626	-0.868407	0.385171	0.579702
ENSG00000068781	STON1-GTF2A1L	0
ENSG00000068784	SRBD1	841.779	-0.186394	0.084771	-2.1988	0.0278922	0.0790157
ENSG00000068796	KIF2A	2665.34	0.00701989	0.0731249	0.0959986	0.923522	0.962906
ENSG00000068831	RASGRP2	8.13587	0.567603	0.887827	0.639317	0.522617	0.704164
ENSG00000068878	PSME4	3638.63	-0.0970567	0.0823387	-1.17875	0.238498	0.417655
ENSG00000068885	IFT80	811.637	0.104902	0.125679	0.834684	0.403896	0.59698
ENSG00000068903	SIRT2	1447.07	0.255574	0.0811167	3.1507	0.00162881	0.00704034
ENSG00000068912	ERLEC1	3213.27	-0.133823	0.0557612	-2.39994	0.0163979	0.0511229
ENSG00000068971	PPP2R5B	349.921	0.490274	0.129997	3.77143	0.000162313	0.000891988
ENSG00000068976	PYGM	4.52768	1.61698	1.07863	1.49911	0.133845	0.273508
ENSG00000068985	PAGE1	4.82679	-0.0530275	0.997585	-0.0531559	0.957608	0.979154
ENSG00000069011	PITX1	703.189	0.331023	0.118561	2.79201	0.00523818	0.0193842
ENSG00000069018	TRPC7	0
ENSG00000069020	MAST4	472.955	0.158857	0.151949	1.04546	0.295809	0.485555
ENSG00000069122	ADGRF5	0.157045	1.01599	4.08047	0.248987	0.803371
ENSG00000069188	SDK2	287.973	0.618253	0.175029	3.53229	0.000411976	0.0020591
ENSG00000069206	ADAM7	0.200456	1.01599	4.08047	0.248987	0.803371
ENSG00000069248	NUP133	2019.69	-0.0829139	0.0743299	-1.11548	0.264643	0.450455
ENSG00000069275	NUCKS1	15892.4	0.116855	0.0503823	2.31937	0.0203752	0.0609365
ENSG00000069329	VPS35	6773.74	-0.136124	0.0667398	-2.03963	0.0413872	0.109713
ENSG00000069345	DNAJA2	3312.25	-0.0393665	0.0632516	-0.62238	0.533692	0.712409
ENSG00000069399	BCL3	1251.57	0.178671	0.0971497	1.83913	0.0658956	0.159429
ENSG00000069424	KCNAB2	2258.6	0.135801	0.0807891	1.68093	0.0927758	0.206788
ENSG00000069431	ABCC9	165.682	0.340562	0.176186	1.93297	0.0532399	0.134324
ENSG00000069482	GAL	44.8203	-1.05326	0.36447	-2.88983	0.00385446	0.0149027
ENSG00000069493	CLEC2D	65.6769	0.284815	0.28083	1.01419	0.310492	0.502529
ENSG00000069509	FUNDC1	774.672	0.0662082	0.0871138	0.76002	0.447242	0.637868
ENSG00000069535	MAOB	9.51657	-0.513746	0.737144	-0.696942	0.485839	0.672864
ENSG00000069667	RORA	31.9408	0.378893	0.422398	0.897005	0.369716	0.564838
ENSG00000069696	DRD4	0.200456	1.01599	4.08047	0.248987	0.803371
ENSG00000069702	TGFBR3	718.605	-0.545649	0.138309	-3.94516	7.97469e-05	0.000467355
ENSG00000069764	PLA2G10	0.66386	-1.47931	2.97171	-0.497798	0.618626
ENSG00000069812	HES2	36.2962	0.10307	0.458483	0.224807	0.82213	0.908368
ENSG00000069849	ATP1B3	4875.91	-0.148314	0.0636828	-2.32894	0.0198622	0.0597303
ENSG00000069869	NEDD4	6358.99	-0.0102256	0.0587521	-0.174046	0.861829	0.931226
ENSG00000069943	PIGB	645.673	0.309693	0.0951136	3.25603	0.00112981	0.00506795
ENSG00000069956	MAPK6	4468.35	-0.0467981	0.0649556	-0.720463	0.47124	0.659644
ENSG00000069966	GNB5	1974.08	0.148599	0.0631893	2.35165	0.0186904	0.0568122
ENSG00000069974	RAB27A	334.34	-0.0750245	0.14349	-0.522854	0.601076	0.767081
ENSG00000069998	HDHD5	1458.93	0.165354	0.0796165	2.07689	0.0378121	0.101614
ENSG00000070010	UFD1	2208.42	-0.130384	0.0784084	-1.66289	0.0963352	0.212889
ENSG00000070018	LRP6	3286.32	-0.0163818	0.128769	-0.127218	0.898768	0.950716
ENSG00000070019	GUCY2C	0
ENSG00000070031	SCT	0
ENSG00000070047	PHRF1	17.0381	2.919	3.29642	0.885506	0.375884	0.570892
ENSG00000070061	ELP1	2437.14	-0.687993	0.0801605	-8.58269	9.26802e-18	2.15263e-16
ENSG00000070081	NUCB2	1273.73	0.115368	0.079918	1.44358	0.148857	0.296064
ENSG00000070087	PFN2	6020.63	-0.0765833	0.0538128	-1.42314	0.154694	0.304834
ENSG00000070159	PTPN3	1594.62	-0.828471	0.0679704	-12.1887	3.57093e-34	1.95831e-32
ENSG00000070182	SPTB	159.553	0.274033	0.184216	1.48757	0.136865	0.277835
ENSG00000070190	DAPP1	3.2471	-0.419748	1.41714	-0.296194	0.767082	0.877753
ENSG00000070193	FGF10	0
ENSG00000070214	SLC44A1	2557.17	-0.453269	0.0841616	-5.38569	7.2166e-08	6.75631e-07
ENSG00000070269	TMEM260	551.409	0.0302579	0.115285	0.262461	0.792966	0.893367
ENSG00000070366	SMG6	2168.16	-0.0317163	0.0733285	-0.432523	0.665361	0.812163
ENSG00000070367	EXOC5	3083.6	0.0656168	0.0970548	0.67608	0.49899	0.683822
ENSG00000070371	CLTCL1	360.207	-0.658643	0.142207	-4.63157	3.62899e-06	2.66216e-05
ENSG00000070388	FGF22	2.41545	0.0206656	1.41051	0.0146511	0.988311	0.994005
ENSG00000070404	FSTL3	5559.14	0.0668697	0.0765751	0.873257	0.382523	0.577367
ENSG00000070413	DGCR2	2040.07	0.174207	0.0885604	1.9671	0.0491713	0.126237
ENSG00000070423	RNF126	856.885	0.488729	0.103729	4.71161	2.45772e-06	1.85667e-05
ENSG00000070444	MNT	1316.06	-0.0578756	0.082489	-0.701616	0.482919	0.670289
ENSG00000070476	ZXDC	368.1	0.118153	0.122927	0.961167	0.336468	0.531152
ENSG00000070495	JMJD6	1523.7	-0.145987	0.0776531	-1.87998	0.0601102	0.14804
ENSG00000070501	POLB	549.779	0.223009	0.106099	2.10189	0.0355627	0.0965745
ENSG00000070526	ST6GALNAC1	6.47188	0.693436	0.995929	0.696271	0.486259	0.673269
ENSG00000070540	WIPI1	424.674	0.162082	0.116042	1.39676	0.162487	0.316322
ENSG00000070601	FRMPD1	23.389	1.09993	0.511175	2.15177	0.0314153	0.0873237
ENSG00000070610	GBA2	1087.7	0.351119	0.0884526	3.96958	7.20008e-05	0.000426389
ENSG00000070614	NDST1	4391.11	-0.198982	0.0787625	-2.52635	0.0115255	0.0381303
ENSG00000070669	ASNS	2931.82	-1.78223	0.083645	-21.3071	9.75964e-101	2.65765e-98
ENSG00000070718	AP3M2	664.617	-0.324842	0.0952447	-3.41061	0.000648186	0.00307523
ENSG00000070729	CNGB1	7.34179	-0.852933	0.844294	-1.01023	0.312384	0.504938
ENSG00000070731	ST6GALNAC2	8.20488	-2.63809	0.964428	-2.73539	0.00623062	0.0225032
ENSG00000070748	CHAT	0
ENSG00000070756	PABPC1	36185.3	-0.168313	0.0708283	-2.37635	0.0174847	0.0538731
ENSG00000070759	TESK2	10.507	-0.220596	0.76763	-0.287373	0.773827	0.881106
ENSG00000070761	CFAP20	1373.98	-0.00337096	0.0924995	-0.036443	0.970929	0.985223
ENSG00000070770	CSNK2A2	2868.13	-0.166624	0.0643827	-2.58803	0.00965276	0.0326667
ENSG00000070778	PTPN21	753.898	0.223216	0.0993501	2.24677	0.024655	0.0712275
ENSG00000070785	EIF2B3	809.641	-0.118268	0.105619	-1.11976	0.262818	0.448326
ENSG00000070808	CAMK2A	4.37102	-1.38161	1.08444	-1.27403	0.202652	0.370879
ENSG00000070814	TCOF1	6377.74	-0.18736	0.0525072	-3.56827	0.00035934	0.00182168
ENSG00000070831	CDC42	7735.17	0.151095	0.0568812	2.65632	0.00789981	0.0275734
ENSG00000070882	OSBPL3	1201.02	0.178195	0.10329	1.72519	0.0844926	0.19293
ENSG00000070886	EPHA8	0.307937	-1.72788	4.04522	-0.42714	0.669277
ENSG00000070915	SLC12A3	0.349491	-0.0909577	4.08047	-0.022291	0.982216
ENSG00000070950	RAD18	1178.02	0.0670199	0.0837449	0.800287	0.423545	0.615463
ENSG00000070961	ATP2B1	6969.27	-0.133082	0.0728671	-1.82637	0.0677948	0.162772
ENSG00000070985	TRPM5	0.157045	1.01599	4.08047	0.248987	0.803371
ENSG00000071051	NCK2	673.188	-0.162748	0.1077	-1.51113	0.130755	0.268854
ENSG00000071054	MAP4K4	5067.33	-0.697693	0.0686132	-10.1685	2.74094e-24	9.26989e-23
ENSG00000071073	MGAT4A	308.91	-0.240889	0.167042	-1.44208	0.149278	0.296679
ENSG00000071082	RPL31	11267	-0.627195	0.0597554	-10.496	9.00728e-26	3.31611e-24
ENSG00000071127	WDR1	14530.9	0.135709	0.0578104	2.34748	0.018901	0.0573632
ENSG00000071189	SNX13	1217.24	0.00514766	0.105153	0.0489538	0.960956	0.980657
ENSG00000071203	MS4A12	0
ENSG00000071205	ARHGAP10	457.289	-0.141513	0.116158	-1.21828	0.223119	0.39841
ENSG00000071242	RPS6KA2	17.4063	0.756738	0.744361	1.01663	0.309331	0.501257
ENSG00000071243	ING3	193.078	0.226962	0.194234	1.1685	0.242606	0.422723
ENSG00000071246	VASH1	486.899	0.588755	0.118824	4.95485	7.23856e-07	5.87491e-06
ENSG00000071282	LMCD1	1542.83	-0.0983669	0.0787756	-1.2487	0.211776	0.3834
ENSG00000071462	BUD23	3638.15	-0.0110692	0.0573206	-0.193111	0.846872	0.9218
ENSG00000071537	SEL1L	4894.06	0.176821	0.0849419	2.08167	0.0373726	0.10071
ENSG00000071539	TRIP13	2695.64	-0.0844865	0.0665958	-1.26865	0.204567	0.373645
ENSG00000071553	ATP6AP1	5812.74	0.0181094	0.054836	0.330246	0.741214	0.861606
ENSG00000071564	TCF3	2164.3	0.296603	0.100827	2.94171	0.00326404	0.0128848
ENSG00000071575	TRIB2	18.6705	1.98324	0.559689	3.54346	0.000394906	0.00198372
ENSG00000071626	DAZAP1	4089.41	0.154819	0.0587697	2.63432	0.0084305	0.0290914
ENSG00000071655	MBD3	2552.66	0.0855991	0.0752877	1.13696	0.255555	0.43939
ENSG00000071677	PRLH	0
ENSG00000071794	HLTF	2333.32	-0.0284889	0.0828216	-0.343979	0.730862	0.854801
ENSG00000071859	FAM50A	3100.69	0.16678	0.0678538	2.45794	0.0139738	0.0448218
ENSG00000071889	FAM3A	1388.26	0.45308	0.0842282	5.37919	7.48197e-08	7.00061e-07
ENSG00000071894	CPSF1	2890.72	0.142349	0.086127	1.65278	0.0983753	0.216489
ENSG00000071909	MYO3B	1.62331	1.3097	1.71697	0.762799	0.445583
ENSG00000071967	CYBRD1	1900.87	-1.04588	0.0706191	-14.8101	1.2604e-49	1.14407e-47
ENSG00000071991	CDH19	14.206	-3.02959	0.783058	-3.86892	0.000109317	0.000624203
ENSG00000071994	PDCD2	1319.6	-0.215104	0.0870468	-2.47113	0.0134686	0.0435016
ENSG00000072041	SLC6A15	318.454	1.11904	0.165799	6.74937	1.48492e-11	2.0847e-10
ENSG00000072042	RDH11	5272.67	0.00324591	0.0510693	0.063559	0.949321	0.975175
ENSG00000072062	PRKACA	1774.31	-0.0588843	0.0861175	-0.683768	0.494122	0.679687
ENSG00000072071	ADGRL1	411.964	0.872568	0.119261	7.31643	2.54652e-13	4.23812e-12
ENSG00000072080	SPP2	6.22362	-0.498026	0.922633	-0.539788	0.589343	0.757371
ENSG00000072110	ACTN1	18380.3	-0.0566628	0.045799	-1.23721	0.21601	0.389504
ENSG00000072121	ZFYVE26	1103.69	-0.117491	0.0941008	-1.24857	0.211824	0.383443
ENSG00000072133	RPS6KA6	446.284	0.197993	0.211195	0.937493	0.348505	0.543365
ENSG00000072134	EPN2	1944.35	0.376748	0.0853501	4.41415	1.01408e-05	6.98184e-05
ENSG00000072135	PTPN18	1050.72	-0.188896	0.0792498	-2.38355	0.0171464	0.0530376
ENSG00000072163	LIMS2	30.2546	-0.601807	0.434214	-1.38597	0.165756	0.320985
ENSG00000072182	ASIC4	0.73054	1.57002	2.88883	0.54348	0.586799
ENSG00000072195	SPEG	32.7253	-0.0923731	0.501488	-0.184198	0.853858	0.926038
ENSG00000072201	LNX1	3.38796	0.732666	1.34118	0.546284	0.584871	0.753893
ENSG00000072210	ALDH3A2	10939.8	0.280867	0.0522436	5.3761	7.6117e-08	7.10936e-07
ENSG00000072274	TFRC	17141.2	0.114857	0.0690135	1.66426	0.0960601	0.21246
ENSG00000072310	SREBF1	8975.17	0.134943	0.0654899	2.06052	0.0393488	0.105281
ENSG00000072315	TRPC5	0.155593	1.01599	4.08047	0.248987	0.803371
ENSG00000072364	AFF4	4329.34	0.0748725	0.112218	0.667209	0.504639	0.688576
ENSG00000072401	UBE2D1	940.018	0.202504	0.115508	1.75315	0.0795763	0.184205
ENSG00000072415	MPP5	2022.95	-0.102021	0.0648546	-1.57308	0.115701	0.245088
ENSG00000072422	RHOBTB1	659.686	-0.331733	0.109575	-3.02745	0.00246629	0.0101281
ENSG00000072501	SMC1A	9687.86	-0.0210801	0.0953853	-0.220999	0.825093	0.909641
ENSG00000072506	HSD17B10	3467.26	0.00281611	0.0688735	0.0408881	0.967385	0.983533
ENSG00000072518	MARK2	2076.68	0.181373	0.0790827	2.29346	0.0218217	0.064469
ENSG00000072571	HMMR	2069.75	0.225249	0.095374	2.36174	0.0181893	0.0556182
ENSG00000072609	CHFR	932.972	0.169088	0.115756	1.46072	0.144092	0.288623
ENSG00000072657	TRHDE	4.11117	-4.26527	1.85121	-2.30404	0.0212202	0.0629748
ENSG00000072682	P4HA2	1814.1	0.161446	0.0731869	2.20594	0.0273883	0.0778146
ENSG00000072694	FCGR2B	0.146803	-0.907567	4.08047	-0.222417	0.823989
ENSG00000072736	NFATC3	1633.98	-0.100629	0.0848298	-1.18624	0.235526	0.414052
ENSG00000072756	TRNT1	1069.19	-0.115712	0.0928572	-1.24613	0.212718	0.384754
ENSG00000072778	ACADVL	8247.86	0.640962	0.0496655	12.9056	4.18574e-38	2.61302e-36
ENSG00000072786	STK10	1448.21	0.344092	0.0935442	3.67839	0.000234707	0.00124503
ENSG00000072803	FBXW11	2607.66	-0.031314	0.0682279	-0.458961	0.646262	0.798175
ENSG00000072818	ACAP1	12.1773	0.300522	0.800928	0.375217	0.707499	0.839595
ENSG00000072832	CRMP1	200.105	1.56172	0.17927	8.71159	2.99644e-18	7.24743e-17
ENSG00000072840	EVC	697.081	0.211983	0.126282	1.67865	0.0932202	0.207486
ENSG00000072849	DERL2	2190.91	0.16408	0.0671898	2.44204	0.0146046	0.0464677
ENSG00000072858	SIDT1	122.29	-2.36299	0.241263	-9.79425	1.19181e-22	3.70539e-21
ENSG00000072864	NDE1	484.943	-0.241238	0.181625	-1.32822	0.184105	0.346121
ENSG00000072952	MRVI1	1.06512	2.01915	2.69219	0.750004	0.453252
ENSG00000072954	TMEM38A	53.9549	-0.317133	0.333626	-0.950564	0.341826	0.537005
ENSG00000072958	AP1M1	2220.3	0.0799243	0.0623287	1.2823	0.199737	0.367545
ENSG00000073008	PVR	8226.11	0.573206	0.0461371	12.424	1.93725e-35	1.10061e-33
ENSG00000073050	XRCC1	1757.52	0.258582	0.0719341	3.59471	0.000324755	0.0016637
ENSG00000073060	SCARB1	6979.98	-0.379186	0.0745988	-5.08301	3.71501e-07	3.14274e-06
ENSG00000073067	CYP2W1	1.2939	-0.985651	2.41144	-0.40874	0.682731
ENSG00000073111	MCM2	6161.88	0.130481	0.0492107	2.65147	0.00801411	0.0278984
ENSG00000073146	MOV10L1	1.40801	-0.466828	1.88248	-0.247986	0.804146
ENSG00000073150	PANX2	190.246	-0.810701	0.182866	-4.43332	9.27937e-06	6.43364e-05
ENSG00000073169	SELENOO	410.983	0.017149	0.144329	0.118819	0.905419	0.954094
ENSG00000073282	TP63	74.4823	-2.74571	0.334965	-8.19701	2.46437e-16	5.14164e-15
ENSG00000073331	ALPK1	446.626	0.140572	0.115814	1.21377	0.224834	0.400686
ENSG00000073350	LLGL2	1988.26	0.511223	0.0882625	5.79208	6.95202e-09	7.46432e-08
ENSG00000073417	PDE8A	3222.95	-0.288333	0.0656139	-4.39439	1.11083e-05	7.60488e-05
ENSG00000073464	CLCN4	652.104	0.252009	0.15428	1.63346	0.102373	0.222987
ENSG00000073536	NLE1	1539.16	0.2142	0.0907729	2.35973	0.0182881	0.0558366
ENSG00000073578	SDHA	5899.39	0.165147	0.0629246	2.62453	0.00867696	0.0298246
ENSG00000073584	SMARCE1	5017.41	-0.0272289	0.0528677	-0.515039	0.606526	0.771067
ENSG00000073598	FNDC8	0.821847	0.707716	2.49451	0.283709	0.776633
ENSG00000073605	GSDMB	34.6472	-0.231087	0.379988	-0.608143	0.543093	0.72046
ENSG00000073614	KDM5A	2488.48	-0.240014	0.0844157	-2.84323	0.00446582	0.016951
ENSG00000073670	ADAM11	183.627	-0.530333	0.169503	-3.12875	0.00175549	0.00751645
ENSG00000073711	PPP2R3A	221.887	0.310709	0.171714	1.80946	0.07038	0.16771
ENSG00000073712	FERMT2	1775.41	-0.133773	0.0667281	-2.00475	0.0449902	0.117625
ENSG00000073734	ABCB11	24.3136	-0.38469	0.546302	-0.70417	0.481327	0.668726
ENSG00000073737	DHRS9	52.0633	1.67014	0.374624	4.45817	8.26609e-06	5.764e-05
ENSG00000073754	CD5L	0.155593	1.01599	4.08047	0.248987	0.803371
ENSG00000073756	PTGS2	4804.46	1.00248	0.08226	12.1867	3.66002e-34	2.00022e-32
ENSG00000073792	IGF2BP2	565.816	-0.108987	0.128623	-0.847337	0.396807	0.590531
ENSG00000073803	MAP3K13	570.866	-0.164867	0.105136	-1.56813	0.116851	0.246928
ENSG00000073849	ST6GAL1	291.699	-0.110961	0.148498	-0.747218	0.454932	0.645102
ENSG00000073861	TBX21	2.19955	-2.2507	2.01305	-1.11805	0.263545
ENSG00000073905	VDAC1P1	0.30388	0.0570758	4.08047	0.0139876	0.98884
ENSG00000073910	FRY	21.4001	0.417085	0.799846	0.521457	0.602048	0.767701
ENSG00000073921	PICALM	4749.77	0.0168527	0.0556134	0.303032	0.761865	0.87442
ENSG00000073969	NSF	3083.53	0.112865	0.0645387	1.7488	0.0803259	0.185393
ENSG00000074047	GLI2	1111.2	-0.366963	0.117614	-3.12005	0.00180822	0.00770824
ENSG00000074054	CLASP1	1776.63	-0.58797	0.103156	-5.6998	1.19951e-08	1.23581e-07
ENSG00000074071	MRPS34	3264.28	0.232252	0.0767128	3.02755	0.00246546	0.0101281
ENSG00000074181	NOTCH3	660.269	-1.70905	0.121744	-14.0381	9.11606e-45	7.02337e-43
ENSG00000074201	CLNS1A	2976.91	-0.0436715	0.0597264	-0.731192	0.464662	0.653098
ENSG00000074211	PPP2R2C	2397.11	-0.0378785	0.0680694	-0.556468	0.577891	0.748693
ENSG00000074219	TEAD2	1015.2	0.32571	0.0996249	3.26937	0.00107789	0.00486962
ENSG00000074266	EED	991.027	-0.0574478	0.0823548	-0.697564	0.48545	0.672703
ENSG00000074276	CDHR2	1.50562	2.88701	2.16123	1.33582	0.181608
ENSG00000074317	SNCB	20.9938	-0.34881	0.499057	-0.698939	0.48459	0.671783
ENSG00000074319	TSG101	2455.71	0.112916	0.070913	1.59231	0.111315	0.237807
ENSG00000074356	NCBP3	2183.55	-0.062879	0.0791589	-0.794339	0.426998	0.61849
ENSG00000074370	ATP2A3	558.755	0.370045	0.106729	3.46714	0.000526033	0.00256109
ENSG00000074410	CA12	42556.6	0.438617	0.056577	7.75257	9.00477e-15	1.66341e-13
ENSG00000074416	MGLL	5339.73	0.675347	0.0487011	13.8672	1.00143e-43	7.5317e-42
ENSG00000074527	NTN4	6317.53	0.0444402	0.0474971	0.935642	0.349458	0.54452
ENSG00000074582	BCS1L	843.696	-0.506683	0.086655	-5.84713	5.00126e-09	5.46264e-08
ENSG00000074590	NUAK1	1019.04	-1.41454	0.0839622	-16.8473	1.09735e-63	1.47099e-61
ENSG00000074603	DPP8	1818.58	0.221509	0.0923586	2.39835	0.016469	0.0513041
ENSG00000074621	SLC24A1	385.589	0.507296	0.164172	3.09002	0.00200144	0.00840936
ENSG00000074657	ZNF532	1869.57	-0.128226	0.126486	-1.01376	0.310697	0.50273
ENSG00000074660	SCARF1	1.95366	1.0823	2.49073	0.434529	0.663904
ENSG00000074695	LMAN1	5264.86	0.081251	0.0609871	1.33227	0.182773	0.344312
ENSG00000074696	HACD3	11955.5	-0.0636655	0.04557	-1.39709	0.162386	0.316247
ENSG00000074706	IPCEF1	0.6573	2.85802	2.89174	0.988342	0.322985
ENSG00000074755	ZZEF1	2639.66	0.0285158	0.110247	0.258654	0.795902	0.895333
ENSG00000074771	NOX3	0
ENSG00000074800	ENO1	106408	-0.129164	0.0642819	-2.00933	0.0445018	0.11658
ENSG00000074803	SLC12A1	0.155593	1.01599	4.08047	0.248987	0.803371
ENSG00000074842	MYDGF	2142.43	0.267998	0.0750885	3.5691	0.000358207	0.00181739
ENSG00000074855	ANO8	210.955	0.394271	0.168368	2.34172	0.019195	0.0581111
ENSG00000074935	TUBE1	192.931	-0.469336	0.196794	-2.38491	0.0170832	0.0528731
ENSG00000074964	ARHGEF10L	615.168	0.515629	0.109606	4.7044	2.54618e-06	1.91435e-05
ENSG00000074966	TXK	14.5443	1.07909	0.714137	1.51104	0.130779	0.268854
ENSG00000075035	WSCD2	0.157045	1.01599	4.08047	0.248987	0.803371
ENSG00000075043	KCNQ2	4.51845	-1.44833	1.71594	-0.844046	0.398644	0.592191
ENSG00000075073	TACR2	7.80456	0.568648	0.832603	0.682976	0.494622	0.680197
ENSG00000075089	ACTR6	864.974	-0.125822	0.0899455	-1.39887	0.161852	0.315396
ENSG00000075131	TIPIN	992.751	-0.166373	0.0925002	-1.79862	0.0720787	0.17083
ENSG00000075142	SRI	1844.41	0.313008	0.0870444	3.59596	0.000323192	0.00165677
ENSG00000075151	EIF4G3	2928.62	-0.0142264	0.0841907	-0.168978	0.865814	0.933587
ENSG00000075188	NUP37	1556.79	-0.144046	0.109484	-1.31567	0.188283	0.352173
ENSG00000075213	SEMA3A	1725.6	-0.0812182	0.0915228	-0.88741	0.374858	0.569883
ENSG00000075218	GTSE1	1532.87	0.291339	0.0718328	4.05579	4.99642e-05	0.000305038
ENSG00000075223	SEMA3C	6009.32	0.164689	0.0816216	2.01772	0.0436205	0.114728
ENSG00000075234	TTC38	596.193	0.262225	0.113563	2.30907	0.0209397	0.0622592
ENSG00000075239	ACAT1	2347.86	-0.318736	0.0815742	-3.90731	9.33298e-05	0.000540737
ENSG00000075240	GRAMD4	500.581	-0.10068	0.117619	-0.855981	0.392008	0.586416
ENSG00000075275	CELSR1	4931.94	0.38767	0.0857731	4.51971	6.19246e-06	4.40755e-05
ENSG00000075290	WNT8B	1.62369	-0.677842	1.98955	-0.340701	0.733329
ENSG00000075292	ZNF638	3352.8	-0.332755	0.0661706	-5.02874	4.93704e-07	4.10182e-06
ENSG00000075303	SLC25A40	759.199	0.165797	0.134017	1.23713	0.216039	0.389511
ENSG00000075336	TIMM21	980.909	-0.0190828	0.0878758	-0.217156	0.828086	0.911669
ENSG00000075340	ADD2	3243.01	-0.472981	0.0798827	-5.92094	3.20109e-09	3.57553e-08
ENSG00000075388	FGF4	0.293606	-1.66924	4.05076	-0.412081	0.68028
ENSG00000075391	RASAL2	1168.73	0.00658202	0.116371	0.0565609	0.954895	0.977485
ENSG00000075399	VPS9D1	167.411	0.278507	0.188102	1.48061	0.13871	0.280617
ENSG00000075407	ZNF37A	804.267	-0.209625	0.126259	-1.66028	0.0968589	0.213688
ENSG00000075413	MARK3	2389.33	0.0653216	0.0766303	0.852426	0.393978	0.588137
ENSG00000075415	SLC25A3	17396.9	-0.0150704	0.0669926	-0.224956	0.822014	0.908368
ENSG00000075420	FNDC3B	5119.25	0.114573	0.0996386	1.14989	0.250189	0.432044
ENSG00000075426	FOSL2	4836.33	-0.444004	0.0728971	-6.09083	1.12326e-09	1.30928e-08
ENSG00000075429	CACNG5	13.9845	0.68766	0.65101	1.0563	0.290833	0.480672
ENSG00000075461	CACNG4	602.656	0.637736	0.113417	5.62295	1.87722e-08	1.89208e-07
ENSG00000075539	FRYL	1208.19	0.0402326	0.152398	0.263997	0.791782	0.892861
ENSG00000075568	TMEM131	2033.55	-0.316014	0.0742476	-4.25622	2.07915e-05	0.000136371
ENSG00000075618	FSCN1	6628.47	0.338833	0.0633976	5.34457	9.06321e-08	8.34174e-07
ENSG00000075624	ACTB	194267	0.233122	0.053913	4.32404	1.53199e-05	0.00010231
ENSG00000075643	MOCOS	598.879	-0.436119	0.155046	-2.81284	0.00491068	0.0183746
ENSG00000075651	PLD1	981.121	0.499012	0.119295	4.183	2.87681e-05	0.000183507
ENSG00000075673	ATP12A	1.45129	4.01574	2.21725	1.81114	0.0701196
ENSG00000075702	WDR62	2515.34	-0.17051	0.061308	-2.7812	0.00541591	0.0199438
ENSG00000075711	DLG1	1263.03	0.10427	0.0988801	1.05451	0.291651	0.48133
ENSG00000075785	RAB7A	7316.62	-0.223493	0.0530665	-4.21157	2.53603e-05	0.00016382
ENSG00000075790	BCAP29	786.129	0.0106735	0.123813	0.0862069	0.931302	0.966361
ENSG00000075826	SEC31B	19.6342	0.180029	0.496182	0.362828	0.716733	0.84453
ENSG00000075856	SART3	3206.69	-0.152904	0.0851402	-1.79591	0.0725094	0.171542
ENSG00000075884	ARHGAP15	1.70449	0.804171	1.87921	0.427931	0.668701
ENSG00000075886	TUBA3D	0.160707	-0.907567	4.08047	-0.222417	0.823989
ENSG00000075891	PAX2	13.1985	0.974838	0.685372	1.42235	0.154925	0.305174
ENSG00000075914	EXOSC7	1040.19	-0.00849323	0.0791695	-0.107279	0.914568	0.958399
ENSG00000075945	KIFAP3	710.578	0.107045	0.0915478	1.16927	0.242293	0.422335
ENSG00000075975	MKRN2	1039.71	-0.0464885	0.082529	-0.563299	0.573231	0.744724
ENSG00000076003	MCM6	4722.22	-0.277085	0.0511219	-5.42008	5.95713e-08	5.63733e-07
ENSG00000076043	REXO2	1659.73	-0.257151	0.0736132	-3.49327	0.000477137	0.00234292
ENSG00000076053	RBM7	823.976	-0.265253	0.118582	-2.23688	0.0252943	0.0728017
ENSG00000076067	RBMS2	3118.12	-0.0673345	0.121186	-0.55563	0.578464	0.748997
ENSG00000076108	BAZ2A	4435.06	-0.234563	0.0929544	-2.52342	0.011622	0.038385
ENSG00000076201	PTPN23	2221.79	-0.0333131	0.0712461	-0.467578	0.640086	0.794177
ENSG00000076242	MLH1	2513	0.0865389	0.0669407	1.29277	0.196091	0.362823
ENSG00000076248	UNG	3240.32	-0.180055	0.0686595	-2.62243	0.00873039	0.0299821
ENSG00000076258	FMO4	34.9865	0.340264	0.417809	0.8144	0.415416	0.607901
ENSG00000076321	KLHL20	639.091	-0.144617	0.109774	-1.31741	0.187701	0.351501
ENSG00000076344	RGS11	36.5195	-1.07717	0.394153	-2.73287	0.00627851	0.0226296
ENSG00000076351	SLC46A1	2497.18	0.312658	0.0837305	3.7341	0.000188384	0.00102245
ENSG00000076356	PLXNA2	247.12	-0.286633	0.209528	-1.36799	0.171315	0.328542
ENSG00000076382	SPAG5	4957.1	0.0733736	0.052562	1.39594	0.162731	0.316642
ENSG00000076513	ANKRD13A	584.814	-0.054093	0.106994	-0.505571	0.613158	0.775917
ENSG00000076554	TPD52	3718.54	-0.075783	0.0831788	-0.911087	0.36225	0.557367
ENSG00000076555	ACACB	579.098	-0.316924	0.120063	-2.63966	0.00829896	0.0287128
ENSG00000076604	TRAF4	2533.79	0.0223269	0.077637	0.28758	0.773668	0.880989
ENSG00000076641	PAG1	58.1784	0.381867	0.312189	1.22319	0.221257	0.396116
ENSG00000076650	GPATCH1	818.329	-0.0690618	0.09511	-0.726125	0.467762	0.656171
ENSG00000076662	ICAM3	184.221	-0.0143292	0.218722	-0.0655134	0.947765	0.974448
ENSG00000076685	NT5C2	7131.44	-0.547461	0.0534416	-10.2441	1.25814e-24	4.38655e-23
ENSG00000076706	MCAM	569.476	0.577129	0.118784	4.85862	1.18204e-06	9.37828e-06
ENSG00000076716	GPC4	30.6748	4.1552	0.601594	6.90699	4.95058e-12	7.30743e-11
ENSG00000076770	MBNL3	7.18178	3.49799	1.09284	3.20084	0.00137028	0.00601673
ENSG00000076826	CAMSAP3	202.22	0.345229	0.161062	2.14345	0.0320771	0.0886638
ENSG00000076864	RAP1GAP	2365.35	0.14426	0.0777043	1.85653	0.0633783	0.154475
ENSG00000076924	XAB2	1415.15	0.0324964	0.0769562	0.422271	0.672827	0.816733
ENSG00000076928	ARHGEF1	3775.69	0.106515	0.0592	1.79924	0.0719807	0.170649
ENSG00000076944	STXBP2	1014.46	0.456011	0.0906301	5.03156	4.86506e-07	4.05054e-06
ENSG00000076984	MAP2K7	789.782	0.066165	0.0861806	0.767748	0.442637	0.633186
ENSG00000077009	NMRK2	0
ENSG00000077044	DGKD	3662.43	-1.25844	0.0796812	-15.7934	3.45579e-56	3.81683e-54
ENSG00000077063	CTTNBP2	133.505	3.22089	0.249421	12.9135	3.77864e-38	2.37768e-36
ENSG00000077080	ACTL6B	0.185477	-0.907567	4.08047	-0.222417	0.823989
ENSG00000077092	RARB	463.662	-0.422288	0.111732	-3.77947	0.000157162	0.000867
ENSG00000077097	TOP2B	5455.48	-0.115836	0.0609988	-1.89899	0.0575653	0.143021
ENSG00000077147	TM9SF3	10138.8	0.231131	0.0829047	2.78791	0.00530494	0.0195991
ENSG00000077150	NFKB2	2577.7	-0.8017	0.0860559	-9.31603	1.20775e-20	3.37616e-19
ENSG00000077152	UBE2T	2067.35	0.191514	0.0773756	2.47512	0.0133191	0.0430715
ENSG00000077157	PPP1R12B	534.985	0.42939	0.214797	1.99906	0.0456022	0.118852
ENSG00000077232	DNAJC10	5456.08	-0.464868	0.109327	-4.2521	2.11771e-05	0.000138727
ENSG00000077235	GTF3C1	5960.19	-0.0531754	0.0609604	-0.872295	0.383048	0.577914
ENSG00000077238	IL4R	694.7	-0.292288	0.1186	-2.46449	0.0137207	0.0441445
ENSG00000077254	USP33	1330.51	-0.106559	0.093066	-1.14498	0.252216	0.434691
ENSG00000077264	PAK3	10.1825	-0.884847	0.895008	-0.988647	0.322836	0.516812
ENSG00000077274	CAPN6	0
ENSG00000077279	DCX	0
ENSG00000077312	SNRPA	3294.59	0.0645466	0.0650813	0.991785	0.321302	0.514984
ENSG00000077327	SPAG6	0
ENSG00000077348	EXOSC5	1838.92	0.01099	0.0794895	0.138258	0.890037	0.946106
ENSG00000077380	DYNC1I2	3661.2	-0.44473	0.054463	-8.16573	3.19489e-16	6.57032e-15
ENSG00000077420	APBB1IP	83.0315	-1.87933	0.295549	-6.35879	2.03346e-10	2.59213e-09
ENSG00000077454	LRCH4	700.356	0.429726	0.0969482	4.43254	9.31307e-06	6.45417e-05
ENSG00000077458	FAM76B	308.704	0.402754	0.153734	2.61981	0.00879784	0.0301744
ENSG00000077463	SIRT6	522.894	-0.245758	0.12969	-1.89497	0.0580968	0.14407
ENSG00000077498	TYR	0
ENSG00000077514	POLD3	1231.08	0.143645	0.0900237	1.59564	0.110569	0.236566
ENSG00000077522	ACTN2	1.1971	0.269858	2.33893	0.115377	0.908146
ENSG00000077549	CAPZB	6234.95	0.00389353	0.0640835	0.0607571	0.951553	0.975834
ENSG00000077585	GPR137B	593.379	0.0503917	0.116513	0.432499	0.665379	0.812163
ENSG00000077616	NAALAD2	0.877765	3.20192	2.68983	1.19038	0.233898
ENSG00000077684	JADE1	1727.15	-0.246256	0.0793998	-3.10147	0.00192559	0.0081383
ENSG00000077713	SLC25A43	1372.68	-0.338525	0.0752599	-4.49808	6.85703e-06	4.86212e-05
ENSG00000077721	UBE2A	4446.91	0.100083	0.0589943	1.69649	0.089793	0.201792
ENSG00000077782	FGFR1	7138.46	1.25037	0.0477714	26.1739	5.26692e-151	3.32743e-148
ENSG00000077800	FKBP6	0.316272	0.0608941	4.08047	0.0149233	0.988093
ENSG00000077935	SMC1B	2.81045	0.109103	1.47414	0.0740117	0.941001	0.971301
ENSG00000077942	FBLN1	1848.04	-0.0223841	0.0918838	-0.243613	0.80753	0.901902
ENSG00000077943	ITGA8	0.146803	-0.907567	4.08047	-0.222417	0.823989
ENSG00000077984	CST7	0.655723	-0.125849	3.00982	-0.0418127	0.966648
ENSG00000078018	MAP2	66.5372	-0.839973	0.340038	-2.47023	0.0135025	0.0435845
ENSG00000078043	PIAS2	538.288	0.0137036	0.13702	0.100012	0.920335	0.96136
ENSG00000078053	AMPH	17.0294	2.52991	0.625269	4.04611	5.20747e-05	0.000316821
ENSG00000078061	ARAF	2627.92	0.235488	0.070955	3.31884	0.000903918	0.00414051
ENSG00000078070	MCCC1	504.966	0.130237	0.105561	1.23376	0.217292	0.391324
ENSG00000078081	LAMP3	208.781	0.342544	0.165219	2.07327	0.0381473	0.102379
ENSG00000078098	FAP	0.591532	-1.41923	3.12307	-0.454434	0.649517
ENSG00000078114	NEBL	648.417	-0.131092	0.12399	-1.05728	0.290386	0.480347
ENSG00000078124	ACER3	1843.68	-0.0615073	0.127838	-0.481135	0.630421	0.788101
ENSG00000078140	UBE2K	2660.36	-0.0955028	0.0775068	-1.23219	0.21788	0.392203
ENSG00000078142	PIK3C3	775.028	-0.192497	0.112374	-1.713	0.0867131	0.196659
ENSG00000078177	N4BP2	497.405	-0.0777197	0.127574	-0.609214	0.542383	0.720013
ENSG00000078237	TIGAR	1668.53	-0.117881	0.0915877	-1.28708	0.198066	0.365283
ENSG00000078246	TULP3	1251.89	-0.0390904	0.0760619	-0.513929	0.607302	0.77138
ENSG00000078269	SYNJ2	3601.51	0.419821	0.0639991	6.55979	5.3884e-11	7.13963e-10
ENSG00000078295	ADCY2	7.54427	1.63614	1.12744	1.4512	0.146724	0.292596
ENSG00000078304	PPP2R5C	3263.27	0.00318282	0.0606271	0.0524982	0.958132	0.979465
ENSG00000078319	PMS2P1	394.465	-0.122836	0.118155	-1.03962	0.298517	0.488511
ENSG00000078328	RBFOX1	1.74274	1.23799	1.94855	0.635339	0.525207
ENSG00000078369	GNB1	11791.1	0.14998	0.0478872	3.13194	0.00173655	0.00744693
ENSG00000078399	HOXA9	3.52592	0.281648	1.59243	0.176867	0.859613	0.929785
ENSG00000078401	EDN1	3648.31	0.643949	0.055768	11.5469	7.65061e-31	3.56442e-29
ENSG00000078403	MLLT10	1346.41	0.0943981	0.0815913	1.15696	0.247288	0.428369
ENSG00000078487	ZCWPW1	72.4024	0.210942	0.271064	0.778199	0.436451	0.626893
ENSG00000078549	ADCYAP1R1	0.562079	1.157	3.62014	0.3196	0.749271
ENSG00000078579	FGF20	0.155593	1.01599	4.08047	0.248987	0.803371
ENSG00000078589	P2RY10	0.513749	2.50519	3.16843	0.790672	0.429135
ENSG00000078596	ITM2A	4.27841	-0.550336	1.1274	-0.488145	0.625447	0.784741
ENSG00000078618	NRDC	5659.52	-0.244232	0.0475996	-5.13097	2.88249e-07	2.47559e-06
ENSG00000078668	VDAC3	6026.88	-0.107545	0.0617506	-1.74161	0.0815772	0.18779
ENSG00000078674	PCM1	4759.59	-0.0980128	0.0957423	-1.02371	0.30597	0.497578
ENSG00000078687	TNRC6C	226.78	0.127775	0.183814	0.695135	0.486971	0.674019
ENSG00000078699	CBFA2T2	624.294	-0.0765486	0.107269	-0.713616	0.475465	0.663031
ENSG00000078725	BRINP1	25.5384	2.09056	0.514118	4.0663	4.7766e-05	0.00029241
ENSG00000078747	ITCH	2248.37	-0.129248	0.0776458	-1.66459	0.0959945	0.212374
ENSG00000078795	PKD2L2	10.6217	0.555785	0.721246	0.77059	0.44095	0.631631
ENSG00000078804	TP53INP2	271.343	-0.206781	0.140568	-1.47104	0.141281	0.284398
ENSG00000078808	SDF4	4528.16	0.00262426	0.0552864	0.0474667	0.962141	0.981404
ENSG00000078814	MYH7B	16.4442	0.365779	0.55004	0.665004	0.506048	0.689783
ENSG00000078898	BPIFB2	0
ENSG00000078900	TP73	3.42838	-2.3841	1.35429	-1.76041	0.0783382	0.182059
ENSG00000078902	TOLLIP	1977.25	-0.0402763	0.0901366	-0.446836	0.654993	0.804555
ENSG00000078967	UBE2D4	542.563	0.0571353	0.104913	0.544597	0.586031	0.754649
ENSG00000079101	CLUL1	1.23098	-0.1489	1.99722	-0.0745539	0.94057
ENSG00000079102	RUNX1T1	0.155593	1.01599	4.08047	0.248987	0.803371
ENSG00000079112	CDH17	803.588	0.680426	0.11776	5.77806	7.55672e-09	8.0697e-08
ENSG00000079134	THOC1	578.561	-0.243527	0.126958	-1.91817	0.0550896	0.138196
ENSG00000079150	FKBP7	237.245	-0.450692	0.150903	-2.98664	0.00282061	0.0113877
ENSG00000079156	OSBPL6	204.807	-1.60783	0.197053	-8.15938	3.36747e-16	6.91623e-15
ENSG00000079215	SLC1A3	0.146803	-0.907567	4.08047	-0.222417	0.823989
ENSG00000079246	XRCC5	13774.3	-0.37177	0.0429195	-8.66203	4.63448e-18	1.09576e-16
ENSG00000079257	LXN	607.662	-1.95006	0.109076	-17.878	1.75076e-71	2.76515e-69
ENSG00000079263	SP140	4.1913	-1.62364	1.17024	-1.38744	0.165307	0.320468
ENSG00000079277	MKNK1	603.59	0.0622237	0.124093	0.501427	0.616071	0.778168
ENSG00000079308	TNS1	76.7477	-0.972648	0.422903	-2.29993	0.0214522	0.0635542
ENSG00000079313	REXO1	887.448	-0.0497809	0.102307	-0.486585	0.626552	0.785279
ENSG00000079332	SAR1A	2935.28	-0.111437	0.0559211	-1.99275	0.0462892	0.120344
ENSG00000079335	CDC14A	180.54	-0.21608	0.199588	-1.08263	0.278972	0.467886
ENSG00000079337	RAPGEF3	50.5905	-0.218345	0.318598	-0.68533	0.493135	0.67898
ENSG00000079385	CEACAM1	335.838	0.895636	0.134286	6.66961	2.56479e-11	3.5133e-10
ENSG00000079387	SENP1	1257.35	-0.0734255	0.101738	-0.721714	0.47047	0.658742
ENSG00000079393	DUSP13	4.21628	0.257765	1.04802	0.245955	0.805717	0.900984
ENSG00000079432	CIC	5907.42	0.214269	0.0603829	3.5485	0.000387428	0.00194936
ENSG00000079435	LIPE	127.119	0.0864105	0.251654	0.34337	0.73132	0.855069
ENSG00000079459	FDFT1	587.522	-0.0556301	0.117614	-0.472991	0.63622	0.79184
ENSG00000079462	PAFAH1B3	3030.81	0.124864	0.0877624	1.42275	0.154809	0.305022
ENSG00000079482	OPHN1	396.443	0.100306	0.229135	0.437759	0.661561	0.809605
ENSG00000079557	AFM	0.479306	-2.35701	3.73705	-0.630713	0.528228
ENSG00000079616	KIF22	3290.64	0.00339895	0.058347	0.058254	0.953546	0.976801
ENSG00000079689	SCGN	3.2616	1.00204	1.25102	0.800978	0.423144	0.615188
ENSG00000079691	CARMIL1	1201.77	0.28121	0.0787752	3.56977	0.000357289	0.00181331
ENSG00000079739	PGM1	2435.36	0.290371	0.0614447	4.72573	2.29288e-06	1.73937e-05
ENSG00000079785	DDX1	5941.45	-0.366817	0.0474721	-7.727	1.10112e-14	2.0152e-13
ENSG00000079805	DNM2	3980.75	0.138137	0.0624114	2.21333	0.0268749	0.0765854
ENSG00000079819	EPB41L2	2703.52	0.0256469	0.0704383	0.364105	0.71578	0.844127
ENSG00000079841	RIMS1	0.485961	-1.9466	3.78018	-0.51495	0.606588
ENSG00000079931	MOXD1	95.9439	0.557404	0.235618	2.36571	0.0179957	0.0551891
ENSG00000079950	STX7	985.142	0.0694974	0.0961093	0.723108	0.469613	0.658067
ENSG00000079974	RABL2B	590.167	-0.200995	0.122576	-1.63976	0.101056	0.221194
ENSG00000079999	KEAP1	2872.43	-0.255154	0.0640724	-3.98227	6.82596e-05	0.00040612
ENSG00000080007	DDX43	0
ENSG00000080031	PTPRH	257.528	0.0477862	0.183751	0.260059	0.794818	0.894624
ENSG00000080166	DCT	1.78224	0.721268	1.98934	0.362567	0.716929
ENSG00000080189	SLC35C2	1984.2	-0.190787	0.078763	-2.4223	0.0154228	0.0485718
ENSG00000080200	CRYBG3	1062.07	0.125236	0.0897241	1.39579	0.162777	0.31669
ENSG00000080224	EPHA6	90.9119	4.7703	0.419357	11.3753	5.5539e-30	2.42987e-28
ENSG00000080293	SCTR	0.347202	0.0531933	4.08047	0.0130361	0.989599
ENSG00000080298	RFX3	229.322	0.257878	0.183698	1.40382	0.160373	0.313248
ENSG00000080345	RIF1	3070.99	-0.265088	0.0978433	-2.70931	0.00674227	0.0240758
ENSG00000080371	RAB21	2444.8	-0.133531	0.0681498	-1.95938	0.0500689	0.127992
ENSG00000080493	SLC4A4	484.878	1.40038	0.112068	12.4958	7.87292e-36	4.55476e-34
ENSG00000080503	SMARCA2	1816.83	-0.0463198	0.0880789	-0.52589	0.598964	0.765995
ENSG00000080511	RDH8	0.157045	1.01599	4.08047	0.248987	0.803371
ENSG00000080546	SESN1	444.776	-0.0362802	0.138104	-0.262702	0.792781	0.893221
ENSG00000080561	MID2	239.851	-0.423392	0.150042	-2.82182	0.00477519	0.0179442
ENSG00000080572	PIH1D3	0.44839	-0.698732	3.89706	-0.179297	0.857704
ENSG00000080573	COL5A3	13.1512	0.484002	0.611023	0.792117	0.428293	0.619494
ENSG00000080603	SRCAP	3384.5	0.132513	0.127063	1.04289	0.297001	0.486904
ENSG00000080608	PUM3	2503.82	-0.0444986	0.0687531	-0.647224	0.517487	0.700179
ENSG00000080618	CPB2	0.824987	-0.403115	2.49021	-0.16188	0.871401
ENSG00000080644	CHRNA3	49.7314	0.39295	0.332262	1.18265	0.236947	0.415724
ENSG00000080709	KCNN2	36.9351	1.71416	0.382945	4.47627	7.59596e-06	5.3439e-05
ENSG00000080802	CNOT4	778.738	-0.108219	0.098553	-1.09808	0.272169	0.459864
ENSG00000080815	PSEN1	3337.78	0.0129775	0.0618632	0.209778	0.833841	0.914562
ENSG00000080819	CPOX	1423.27	0.366299	0.0802307	4.56558	4.98127e-06	3.59079e-05
ENSG00000080822	CLDND1	1150.06	-0.0698727	0.0786496	-0.888404	0.374323	0.569456
ENSG00000080823	MOK	495.817	0.423848	0.121924	3.47634	0.000508313	0.00248247
ENSG00000080824	HSP90AA1	90813.6	-0.0205746	0.0424151	-0.485077	0.627621	0.78597
ENSG00000080839	RBL1	1520.47	0.0234459	0.0946152	0.247803	0.804287	0.900085
ENSG00000080845	DLGAP4	2857.06	0.269672	0.0707183	3.81333	0.000137109	0.00076709
ENSG00000080854	IGSF9B	123.137	0.951516	0.309945	3.06995	0.00214094	0.00891955
ENSG00000080910	CFHR2	6.61928	0.221467	0.829555	0.266971	0.789492	0.89187
ENSG00000080947	CROCCP3	14.9537	-0.477198	0.782653	-0.609718	0.542048	0.719784
ENSG00000080986	NDC80	475.954	0.361684	0.118867	3.04275	0.00234423	0.00968475
ENSG00000081014	AP4E1	1287.84	-0.0580592	0.100074	-0.580162	0.561805	0.735507
ENSG00000081019	RSBN1	318.316	0.258767	0.136242	1.89932	0.057523	0.142952
ENSG00000081026	MAGI3	644.012	0.204237	0.105294	1.93968	0.0524181	0.132696
ENSG00000081041	CXCL2	320.664	0.355518	0.147429	2.41146	0.0158888	0.0497615
ENSG00000081051	AFP	10.5848	-1.04755	0.700617	-1.49518	0.134866	0.274707
ENSG00000081052	COL4A4	276.26	-0.915092	0.194933	-4.6944	2.67384e-06	2.0018e-05
ENSG00000081059	TCF7	258.167	0.342349	0.156912	2.18179	0.0291251	0.0818509
ENSG00000081087	OSTM1	1855.01	-0.131283	0.0781752	-1.67934	0.0930862	0.207246
ENSG00000081138	CDH7	17.5391	-0.311839	0.614332	-0.507607	0.611729	0.774694
ENSG00000081148	IMPG2	2.05754	1.0991	1.62861	0.674868	0.49976
ENSG00000081154	PCNP	4471.5	-0.0645367	0.0623413	-1.03522	0.300568	0.490867
ENSG00000081177	EXD2	1334.68	-0.0768835	0.073181	-1.05059	0.293445	0.482735
ENSG00000081181	ARG2	39.9365	0.387811	0.35371	1.09641	0.272899	0.460733
ENSG00000081189	MEF2C	1.05608	0.576707	2.29208	0.251608	0.801344
ENSG00000081237	PTPRC	1.64803	-1.43781	2.20555	-0.651905	0.514463
ENSG00000081248	CACNA1S	0.455289	-2.292	3.8028	-0.602713	0.546699
ENSG00000081277	PKP1	0.417367	0.489361	4.03134	0.121389	0.903383
ENSG00000081307	UBA5	789.718	0.357784	0.110882	3.22671	0.0012522	0.00554919
ENSG00000081320	STK17B	360.283	-0.487416	0.123008	-3.96246	7.41816e-05	0.00043736
ENSG00000081377	CDC14B	680.231	-0.42525	0.138442	-3.07169	0.00212848	0.00887222
ENSG00000081386	ZNF510	285.362	-0.970822	0.144139	-6.7353	1.63587e-11	2.28645e-10
ENSG00000081479	LRP2	4.33167	-0.0217392	1.33997	-0.0162236	0.987056	0.993725
ENSG00000081665	ZNF506	19.4065	-0.562932	0.551567	-1.0206	0.307442	0.499099
ENSG00000081692	JMJD4	1024.33	0.156765	0.0941848	1.66444	0.0960247	0.212411
ENSG00000081721	DUSP12	780.944	-0.343512	0.0944303	-3.63773	0.000275047	0.00143228
ENSG00000081760	AACS	1785.62	0.0189905	0.0639692	0.29687	0.766566	0.87738
ENSG00000081791	DELE1	1343.16	0.00132379	0.0784243	0.0168799	0.986532	0.993601
ENSG00000081800	SLC13A1	2.13295	-0.616435	1.58951	-0.387814	0.698154
ENSG00000081803	CADPS2	179.603	4.15262	0.244756	16.9663	1.45736e-64	2.01909e-62
ENSG00000081818	PCDHB4	3.86592	0.727277	1.2647	0.575059	0.565252	0.738366
ENSG00000081842	PCDHA6	9.53532	0.573837	0.723399	0.79325	0.427632	0.619107
ENSG00000081853	PCDHGA2	84.8455	0.204034	0.279876	0.729016	0.465992	0.654502
ENSG00000081870	HSPB11	573.339	-0.0162436	0.11499	-0.141261	0.887664	0.944728
ENSG00000081913	PHLPP1	509.506	-0.11428	0.115609	-0.988501	0.322908	0.516828
ENSG00000081923	ATP8B1	1928.62	-0.304834	0.101042	-3.0169	0.00255376	0.0104383
ENSG00000081985	IL12RB2	0.768065	0.0565765	2.85572	0.0198117	0.984194
ENSG00000082014	SMARCD3	262.213	-0.0269147	0.160045	-0.168169	0.86645	0.933983
ENSG00000082068	WDR70	743.806	-0.0455353	0.135412	-0.336271	0.736666	0.85887
ENSG00000082074	FYB1	618.318	-1.6026	0.143344	-11.1801	5.10314e-29	2.12103e-27
ENSG00000082126	MPP4	2.23683	-0.129657	1.46164	-0.0887065	0.929315
ENSG00000082146	STRADB	1118.91	-0.288688	0.0962825	-2.99834	0.0027145	0.0110213
ENSG00000082153	BZW1	11368.7	-0.55738	0.0518376	-10.7524	5.77293e-27	2.26247e-25
ENSG00000082175	PGR	0.552283	-1.08237	3.6837	-0.293828	0.768889
ENSG00000082196	C1QTNF3	2.81454	1.43073	1.55139	0.922226	0.356411	0.551481
ENSG00000082212	ME2	2379.04	-0.00854124	0.0622717	-0.137161	0.890904	0.946422
ENSG00000082213	C5orf22	910.429	0.313003	0.0916028	3.41696	0.000633239	0.00300974
ENSG00000082258	CCNT2	586.622	-0.306886	0.117558	-2.61051	0.00904064	0.0308864
ENSG00000082269	FAM135A	714.433	-0.21968	0.134807	-1.62959	0.103189	0.224298
ENSG00000082293	COL19A1	1.51585	-0.175859	1.6742	-0.105041	0.916344
ENSG00000082397	EPB41L3	9.42856	-6.64442	1.43187	-4.64039	3.47751e-06	2.55698e-05
ENSG00000082438	COBLL1	294.525	0.0508849	0.162286	0.31355	0.753863	0.869281
ENSG00000082458	DLG3	421.929	0.379294	0.16378	2.31588	0.0205647	0.0613638
ENSG00000082482	KCNK2	0.46772	2.38749	3.76383	0.634323	0.52587
ENSG00000082512	TRAF5	401.381	-0.195523	0.131037	-1.49212	0.135667	0.275876
ENSG00000082515	MRPL22	1079.52	-0.0345769	0.0980341	-0.352703	0.724311	0.84953
ENSG00000082516	GEMIN5	2089.21	-0.0668392	0.0689702	-0.969102	0.332494	0.527092
ENSG00000082556	OPRK1	0.881796	-1.26275	2.73289	-0.462056	0.644041
ENSG00000082641	NFE2L1	12339	-0.104485	0.0862146	-1.21192	0.225544	0.401492
ENSG00000082684	SEMA5B	9.59299	0.580203	0.752719	0.770809	0.44082	0.631536
ENSG00000082701	GSK3B	3283.37	0.00118912	0.066724	0.0178215	0.985781	0.993265
ENSG00000082781	ITGB5	18872.3	-0.381643	0.070312	-5.42785	5.70356e-08	5.40708e-07
ENSG00000082805	ERC1	2440.48	-0.148837	0.0664825	-2.23874	0.0251728	0.0725114
ENSG00000082898	XPO1	13755.8	-0.317585	0.0603683	-5.26079	1.43435e-07	1.28789e-06
ENSG00000082996	RNF13	2108.83	0.104611	0.0872446	1.19905	0.230507	0.407746
ENSG00000083067	TRPM3	11.0637	-0.0241191	0.674098	-0.0357798	0.971458	0.985517
ENSG00000083093	PALB2	855.006	0.0962718	0.130902	0.735451	0.462065	0.650839
ENSG00000083097	DOP1A	249.135	0.093623	0.215007	0.435441	0.663242	0.811021
ENSG00000083099	LYRM2	1554.15	-0.0249459	0.0817023	-0.305327	0.760117	0.873239
ENSG00000083123	BCKDHB	380.382	0.357442	0.138764	2.57591	0.00999779	0.0337044
ENSG00000083168	KAT6A	2298.14	0.083686	0.121812	0.687008	0.492077	0.677937
ENSG00000083223	TUT7	768.663	-0.540101	0.110231	-4.89974	9.59642e-07	7.70151e-06
ENSG00000083290	ULK2	1225.28	0.46523	0.107532	4.32644	1.51536e-05	0.000101284
ENSG00000083307	GRHL2	0.726133	-0.394467	3.32155	-0.11876	0.905465
ENSG00000083312	TNPO1	11848.5	-0.549574	0.0627101	-8.76372	1.88905e-18	4.62568e-17
ENSG00000083444	PLOD1	4926.16	-0.0627247	0.060991	-1.02843	0.303749	0.494936
ENSG00000083454	P2RX5	243.544	-1.44773	0.192773	-7.51002	5.91204e-14	1.02723e-12
ENSG00000083457	ITGAE	807.061	0.00237405	0.093465	0.0254004	0.979736	0.990142
ENSG00000083520	DIS3	1635.52	-0.129194	0.0720043	-1.79426	0.0727716	0.171982
ENSG00000083535	PIBF1	287.5	-0.14195	0.14234	-0.997259	0.318639	0.512142
ENSG00000083544	TDRD3	327.587	0.181902	0.132833	1.36941	0.170873	0.328277
ENSG00000083635	NUFIP1	529.097	0.0424426	0.103942	0.408329	0.683032	0.823222
ENSG00000083642	PDS5B	1038.32	0.0244852	0.085675	0.285792	0.775037	0.881594
ENSG00000083720	OXCT1	107.085	-1.06838	0.300565	-3.55457	0.000378596	0.00190857
ENSG00000083750	RRAGB	351.244	0.0786302	0.150661	0.521903	0.601738	0.767492
ENSG00000083782	EPYC	0
ENSG00000083799	CYLD	777.485	-0.357766	0.0952543	-3.75591	0.000172715	0.000943894
ENSG00000083807	SLC27A5	508.539	0.155713	0.115712	1.3457	0.1784	0.338272
ENSG00000083812	ZNF324	313.986	-0.0255176	0.137495	-0.185589	0.852767	0.925105
ENSG00000083814	ZNF671	32.1656	-2.03085	0.463728	-4.3794	1.19008e-05	8.10998e-05
ENSG00000083817	ZNF416	174.049	-0.256485	0.173581	-1.47761	0.139513	0.281738
ENSG00000083828	ZNF586	232.14	-0.167236	0.166997	-1.00143	0.316617	0.509906
ENSG00000083838	ZNF446	509.992	0.134256	0.115074	1.16669	0.243336	0.423546
ENSG00000083844	ZNF264	355.505	-0.499221	0.169437	-2.94636	0.00321543	0.0127216
ENSG00000083845	RPS5	26466.2	-0.079715	0.0797286	-0.999829	0.317393	0.510687
ENSG00000083857	FAT1	10336.7	0.285846	0.0574857	4.97248	6.61019e-07	5.39541e-06
ENSG00000083896	YTHDC1	2161.89	0.0440422	0.0667287	0.660019	0.509242	0.692583
ENSG00000083937	CHMP2B	4038.26	0.145006	0.0524273	2.76585	0.00567743	0.020776
ENSG00000084070	SMAP2	541.694	-0.140246	0.10264	-1.36639	0.171817	0.329369
ENSG00000084072	PPIE	1155.33	0.0423656	0.0753028	0.562603	0.573706	0.745095
ENSG00000084073	ZMPSTE24	3462.66	0.101659	0.0632453	1.60738	0.107971	0.232297
ENSG00000084090	STARD7	5686.55	-0.530354	0.0472386	-11.2271	3.00035e-29	1.26367e-27
ENSG00000084092	NOA1	910.66	-0.0800088	0.0885753	-0.903285	0.366375	0.561362
ENSG00000084093	REST	1293.61	-0.0230905	0.103027	-0.22412	0.822664	0.908478
ENSG00000084110	HAL	1.45146	1.68972	2.34938	0.719218	0.472007
ENSG00000084112	SSH1	2796.52	-0.36199	0.229267	-1.5789	0.114359	0.242657
ENSG00000084207	GSTP1	18024.5	0.125264	0.0666754	1.87871	0.0602845	0.148403
ENSG00000084234	APLP2	11300.1	-0.11293	0.052885	-2.13539	0.0327296	0.0901676
ENSG00000084444	FAM234B	378.449	0.0512047	0.133787	0.382733	0.701918	0.835929
ENSG00000084453	SLCO1A2	26.0621	1.15333	0.494595	2.33186	0.019708	0.0593911
ENSG00000084463	WBP11	4695.04	-0.142543	0.0649062	-2.19614	0.0280819	0.0794421
ENSG00000084623	EIF3I	8389.06	0.0601692	0.0699691	0.859939	0.389823	0.584175
ENSG00000084628	NKAIN1	50.4679	0.253942	0.30933	0.820944	0.411678	0.603997
ENSG00000084636	COL16A1	197.06	0.217026	0.184008	1.17944	0.238224	0.417268
ENSG00000084652	TXLNA	3072.04	-0.108601	0.0646128	-1.6808	0.0928023	0.206818
ENSG00000084674	APOB	0
ENSG00000084676	NCOA1	1335.61	-0.371392	0.0936728	-3.96478	7.3465e-05	0.000433922
ENSG00000084693	AGBL5	1522.21	-0.464636	0.0746892	-6.22093	4.94227e-10	6.02301e-09
ENSG00000084710	EFR3B	1201.82	-0.803263	0.0870297	-9.22975	2.71252e-20	7.42487e-19
ENSG00000084731	KIF3C	3987.02	-0.241727	0.0716806	-3.37228	0.000745479	0.00348037
ENSG00000084733	RAB10	14274	-0.679174	0.0557172	-12.1897	3.52855e-34	1.94181e-32
ENSG00000084734	GCKR	1.40865	-2.71652	2.06615	-1.31477	0.188586
ENSG00000084754	HADHA	7985.83	-0.623745	0.0612099	-10.1903	2.19155e-24	7.45976e-23
ENSG00000084764	MAPRE3	656.358	0.423214	0.0976906	4.33218	1.47639e-05	9.8889e-05
ENSG00000084774	CAD	5951.4	-0.303421	0.0754381	-4.02212	5.7677e-05	0.000348223
ENSG00000085063	CD59	8333.97	-0.526826	0.0615449	-8.56003	1.12836e-17	2.60547e-16
ENSG00000085117	CD82	188.286	-0.515741	0.207122	-2.49003	0.0127731	0.0416128
ENSG00000085185	BCORL1	756.894	0.0343688	0.121764	0.282257	0.777746	0.883403
ENSG00000085224	ATRX	3246.34	-0.0258058	0.101909	-0.253225	0.800094	0.898274
ENSG00000085231	AK6	0
ENSG00000085265	FCN1	2.14044	-1.1143	1.45369	-0.766535	0.443358
ENSG00000085274	MYNN	635.361	0.00269459	0.102336	0.0263309	0.978993	0.989935
ENSG00000085276	MECOM	30.8169	1.93656	0.50153	3.8613	0.000112784	0.000641911
ENSG00000085365	SCAMP1	2124.5	0.0744705	0.073018	1.01989	0.307779	0.499442
ENSG00000085377	PREP	2004.86	0.0978297	0.0667916	1.4647	0.143003	0.286986
ENSG00000085382	HACE1	205.803	-0.124012	0.198257	-0.625511	0.531636	0.710918
ENSG00000085415	SEH1L	1696.8	-0.116691	0.0899946	-1.29665	0.194753	0.36094
ENSG00000085433	WDR47	417.579	-0.0344479	0.112787	-0.305424	0.760044	0.873218
ENSG00000085449	WDFY1	2017.41	-0.336675	0.0716956	-4.69589	2.65449e-06	1.98885e-05
ENSG00000085465	OVGP1	53.9853	1.08793	0.323581	3.36214	0.000773397	0.00359477
ENSG00000085491	SLC25A24	2253.82	0.314501	0.0726248	4.33048	1.48781e-05	9.95278e-05
ENSG00000085511	MAP3K4	718.694	0.31333	0.117025	2.67746	0.00741834	0.0261647
ENSG00000085514	PILRA	9.34023	0.408	0.755168	0.540277	0.589006	0.757104
ENSG00000085552	IGSF9	10.7634	0.974255	0.711583	1.36914	0.170956	0.328362
ENSG00000085563	ABCB1	36.4722	3.17359	0.548475	5.7862	7.19957e-09	7.71439e-08
ENSG00000085644	ZNF213	530.259	-0.0281109	0.115537	-0.243306	0.807768	0.901936
ENSG00000085662	AKR1B1	48495.9	-0.118985	0.0547661	-2.1726	0.0298107	0.0834298
ENSG00000085719	CPNE3	4383.19	-0.027501	0.051759	-0.531327	0.595192	0.762468
ENSG00000085721	RRN3	1487.14	-0.492142	0.288371	-1.70662	0.0878918	0.198479
ENSG00000085733	CTTN	11038.5	-0.0326332	0.0431165	-0.756862	0.449133	0.639755
ENSG00000085741	WNT11	6.57957	-1.53536	0.939108	-1.63491	0.102067	0.222483
ENSG00000085760	MTIF2	2175.17	-0.429641	0.0614853	-6.98771	2.79413e-12	4.1989e-11
ENSG00000085788	DDHD2	1518.45	0.143113	0.0867011	1.65065	0.0988102	0.217355
ENSG00000085831	TTC39A	143.965	0.100545	0.204109	0.492606	0.622291	0.782885
ENSG00000085832	EPS15	1195.54	-0.171366	0.083729	-2.04667	0.0406907	0.108212
ENSG00000085840	ORC1	1196.03	-0.174244	0.0775632	-2.24647	0.0246737	0.0712633
ENSG00000085871	MGST2	1075.91	-0.0650465	0.0900187	-0.722589	0.469933	0.658222
ENSG00000085872	CHERP	1820.3	0.0635083	0.0789067	0.804853	0.420904	0.613206
ENSG00000085978	ATG16L1	1698.83	-0.687085	0.0703319	-9.76919	1.52669e-22	4.71869e-21
ENSG00000085982	USP40	1917.69	-0.434799	0.0774884	-5.61116	2.00979e-08	2.01669e-07
ENSG00000085998	POMGNT1	2375.63	-0.0585643	0.062725	-0.933668	0.350475	0.545468
ENSG00000085999	RAD54L	473.575	0.144353	0.127176	1.13507	0.256348	0.440321
ENSG00000086015	MAST2	2255.04	-0.314364	0.0728001	-4.31819	1.57317e-05	0.000105015
ENSG00000086061	DNAJA1	17123.2	-0.00074697	0.0515854	-0.0144803	0.988447	0.994005
ENSG00000086062	B4GALT1	8974	-0.322567	0.0497074	-6.48932	8.62252e-11	1.12549e-09
ENSG00000086065	CHMP5	3229.3	-0.0531444	0.0647267	-0.821059	0.411613	0.603997
ENSG00000086102	NFX1	1832.56	-0.180642	0.0758684	-2.38099	0.0172661	0.0533138
ENSG00000086159	AQP6	6.61875	0.501592	0.838527	0.598182	0.549718	0.726059
ENSG00000086189	DIMT1	1019.7	-0.0212528	0.0874252	-0.243097	0.80793	0.90199
ENSG00000086200	IPO11	1766.25	-0.132594	0.0790892	-1.67651	0.0936385	0.208299
ENSG00000086205	FOLH1	1.42104	-3.90288	2.2231	-1.75561	0.0791558
ENSG00000086232	EIF2AK1	7461.23	0.286145	0.0526432	5.43555	5.4627e-08	5.18809e-07
ENSG00000086288	NME8	0.146803	-0.907567	4.08047	-0.222417	0.823989
ENSG00000086289	EPDR1	5437.26	-0.248908	0.0473326	-5.25869	1.45084e-07	1.30196e-06
ENSG00000086300	SNX10	285.724	0.326824	0.138518	2.35943	0.0183028	0.0558617
ENSG00000086475	SEPHS1	2927.47	-0.162471	0.0654964	-2.48061	0.0131157	0.0425185
ENSG00000086504	MRPL28	3092.13	0.0763121	0.0817596	0.933372	0.350628	0.545572
ENSG00000086506	HBQ1	22.2257	0.0340587	0.471033	0.0723065	0.942358	0.971832
ENSG00000086544	ITPKC	721.052	-0.140743	0.0894988	-1.57257	0.115819	0.24524
ENSG00000086548	CEACAM6	16330	2.28001	0.0446994	51.0076	0	0
ENSG00000086570	FAT2	0.200456	1.01599	4.08047	0.248987	0.803371
ENSG00000086589	RBM22	2180.72	-0.197239	0.0622852	-3.1667	0.00154178	0.00671475
ENSG00000086598	TMED2	11403.4	0.164392	0.0427849	3.8423	0.000121887	0.000689501
ENSG00000086619	ERO1B	336.567	-0.0672408	0.133727	-0.50282	0.615091	0.777491
ENSG00000086666	ZFAND6	3801.47	0.0206989	0.0553985	0.373636	0.708675	0.840443
ENSG00000086696	HSD17B2	2.83253	-1.45699	1.37954	-1.05615	0.290902	0.480697
ENSG00000086712	TXLNG	1327.68	-0.00153785	0.0870286	-0.0176707	0.985902	0.993323
ENSG00000086717	PPEF1	54.3614	0.177978	0.316176	0.562908	0.573498	0.744948
ENSG00000086730	LAT2	53.6585	0.301257	0.314787	0.957021	0.338556	0.533329
ENSG00000086758	HUWE1	13268	0.278944	0.0700606	3.98147	6.84891e-05	0.000406966
ENSG00000086827	ZW10	834.205	-0.0966077	0.0860095	-1.12322	0.261344	0.446523
ENSG00000086848	ALG9	823.802	0.108448	0.0938047	1.1561	0.24764	0.428805
ENSG00000086967	MYBPC2	0.146803	-0.907567	4.08047	-0.222417	0.823989
ENSG00000086991	NOX4	0.83765	-3.15461	2.64746	-1.19156	0.233434
ENSG00000087008	ACOX3	287.321	-0.0368548	0.163782	-0.225023	0.821961	0.908368
ENSG00000087053	MTMR2	1756.4	0.0262934	0.0772959	0.340166	0.733731	0.856635
ENSG00000087074	PPP1R15A	2651.52	-0.0695741	0.0804925	-0.864356	0.387393	0.582047
ENSG00000087076	HSD17B14	452.335	0.200003	0.13315	1.5021	0.133073	0.272494
ENSG00000087077	TRIP6	2374.58	0.0563979	0.0685917	0.822226	0.410948	0.603657
ENSG00000087085	ACHE	13.1801	-0.891127	0.664735	-1.34057	0.180059	0.340214
ENSG00000087086	FTL	352248	-0.366736	0.0639417	-5.73549	9.72329e-09	1.02175e-07
ENSG00000087087	SRRT	4258.58	0.180126	0.0664779	2.70957	0.00673708	0.0240627
ENSG00000087088	BAX	7805.51	0.0994845	0.0785201	1.26699	0.205157	0.374293
ENSG00000087095	NLK	786.492	-0.0459751	0.0944907	-0.486557	0.626572	0.785279
ENSG00000087111	PIGS	3535.27	0.216754	0.070145	3.09009	0.00200097	0.00840936
ENSG00000087116	ADAMTS2	1.76094	1.05355	1.75766	0.599401	0.548905
ENSG00000087128	TMPRSS11E	0
ENSG00000087152	ATXN7L3	3105.56	-0.00419887	0.0661605	-0.0634649	0.949396	0.975175
ENSG00000087157	PGS1	677.821	-0.140725	0.0998011	-1.41006	0.158523	0.310672
ENSG00000087191	PSMC5	7548.15	0.0173978	0.0617085	0.281935	0.777993	0.883473
ENSG00000087206	UIMC1	1201.12	0.237373	0.105667	2.24643	0.0246767	0.0712633
ENSG00000087237	CETP	0
ENSG00000087245	MMP2	107.151	-2.02753	0.322806	-6.28096	3.36493e-10	4.1847e-09
ENSG00000087250	MT3	0.84321	0.620544	2.47839	0.250382	0.802292
ENSG00000087253	LPCAT2	537.159	-0.442701	0.132814	-3.33323	0.00085843	0.00395394
ENSG00000087258	GNAO1	4.62912	0.324903	1.11807	0.290592	0.771364	0.880175
ENSG00000087263	OGFOD1	2588.21	-0.181282	0.0602653	-3.00807	0.00262915	0.010705
ENSG00000087266	SH3BP2	258.193	0.507762	0.165205	3.07352	0.00211551	0.00882523
ENSG00000087269	NOP14	2271.13	-0.0962773	0.0639322	-1.50593	0.132086	0.27086
ENSG00000087274	ADD1	4184.24	0.122917	0.0612176	2.00787	0.0446572	0.11689
ENSG00000087299	L2HGDH	1149.07	-0.081476	0.0876211	-0.929868	0.352439	0.547823
ENSG00000087301	TXNDC16	143.648	-0.229613	0.196709	-1.16727	0.243101	0.423229
ENSG00000087302	RTRAF	4685.8	-0.0757509	0.0667931	-1.13411	0.256748	0.440865
ENSG00000087303	NID2	297.4	-1.26726	0.186076	-6.81046	9.72904e-12	1.39564e-10
ENSG00000087338	GMCL1	1050.92	0.0281376	0.0799031	0.352147	0.724728	0.849893
ENSG00000087365	SF3B2	10782.1	-0.0329329	0.0686073	-0.48002	0.631213	0.788343
ENSG00000087448	KLHL42	1365.05	-0.115982	0.107651	-1.07739	0.281305	0.469979
ENSG00000087460	GNAS	19238.5	-0.0515572	0.0579077	-0.890335	0.373286	0.568604
ENSG00000087470	DNM1L	3722.32	-0.0504956	0.0754382	-0.669364	0.503263	0.68753
ENSG00000087494	PTHLH	230.306	-0.273789	0.154819	-1.76844	0.0769879	0.179635
ENSG00000087495	PHACTR3	0.311186	1.80355	4.04848	0.445487	0.655968
ENSG00000087502	ERGIC2	2068.02	-0.205324	0.0847188	-2.42359	0.0153679	0.0484471
ENSG00000087510	TFAP2C	960.224	-0.378555	0.0938817	-4.03225	5.52448e-05	0.000335333
ENSG00000087586	AURKA	3972.06	-0.0083753	0.0619132	-0.135275	0.892395	0.946828
ENSG00000087589	CASS4	1.8759	-0.946426	1.64572	-0.575082	0.565236
ENSG00000087842	PIR	2237.98	0.276977	0.0598592	4.62714	3.70749e-06	2.71722e-05
ENSG00000087884	AAMDC	210.848	-0.169076	0.158918	-1.06392	0.287366	0.477395
ENSG00000087903	RFX2	208.869	-0.3134	0.195329	-1.60447	0.108611	0.233264
ENSG00000087995	METTL2A	1364.57	-0.140553	0.0864599	-1.62565	0.104025	0.225775
ENSG00000088002	SULT2B1	519.722	2.11732	0.115519	18.3287	4.88439e-75	8.66787e-73
ENSG00000088035	ALG6	513.735	0.33784	0.113773	2.96941	0.00298374	0.0119335
ENSG00000088038	CNOT3	2511.28	0.120341	0.0618546	1.94554	0.0517097	0.131282
ENSG00000088053	GP6	0.65521	1.38139	3.01089	0.458798	0.646379
ENSG00000088179	PTPN4	633.872	-0.0835174	0.112099	-0.745035	0.456251	0.645991
ENSG00000088205	DDX18	4379.07	-0.547005	0.0619916	-8.82385	1.10586e-18	2.74191e-17
ENSG00000088247	KHSRP	6838.14	0.0822146	0.0572414	1.43628	0.150923	0.299073
ENSG00000088256	GNA11	2700.02	0.196916	0.059169	3.32804	0.000874607	0.00401673
ENSG00000088280	ASAP3	232.425	-0.0359346	0.170693	-0.210522	0.83326	0.914496
ENSG00000088298	EDEM2	2200.65	0.233834	0.0747613	3.12774	0.00176155	0.00753778
ENSG00000088305	DNMT3B	344.809	-0.700103	0.154176	-4.54094	5.60051e-06	4.01154e-05
ENSG00000088320	REM1	0
ENSG00000088325	TPX2	7637.38	0.0521969	0.0473778	1.10172	0.270585	0.45815
ENSG00000088340	FER1L4	21.4462	-0.803948	0.480664	-1.67258	0.0944106	0.209622
ENSG00000088356	PDRG1	789.189	-0.05961	0.0980525	-0.60794	0.543228	0.720562
ENSG00000088367	EPB41L1	8634.38	0.408292	0.0697799	5.85114	4.88206e-09	5.33984e-08
ENSG00000088386	SLC15A1	4.76867	1.5161	1.02006	1.48628	0.137205	0.278393
ENSG00000088387	DOCK9	1267.61	-0.220287	0.133003	-1.65626	0.0976694	0.215265
ENSG00000088448	ANKRD10	506.746	-0.27587	0.400846	-0.688219	0.491315	0.677198
ENSG00000088451	TGDS	279.625	-0.119371	0.142924	-0.835204	0.403603	0.596971
ENSG00000088538	DOCK3	130.537	1.21378	0.205865	5.89602	3.72363e-09	4.12998e-08
ENSG00000088543	C3orf18	172.985	0.645757	0.176553	3.65758	0.000254609	0.00133775
ENSG00000088682	COQ9	2239.76	0.301749	0.0722876	4.17429	2.98919e-05	0.000190061
ENSG00000088726	TMEM40	3.04135	-0.955448	1.48761	-0.642269	0.520698	0.702778
ENSG00000088727	KIF9	194.19	-0.111321	0.176546	-0.63055	0.528335	0.708374
ENSG00000088756	ARHGAP28	40.7826	2.7691	0.525052	5.27396	1.3351e-07	1.2022e-06
ENSG00000088766	CRLS1	1544.53	0.0373249	0.0787382	0.474037	0.635473	0.791285
ENSG00000088782	DEFB127	0
ENSG00000088808	PPP1R13B	381.598	0.468191	0.156971	2.98267	0.00285747	0.01151
ENSG00000088812	ATRN	4026.98	0.141245	0.0679649	2.07821	0.03769	0.101358
ENSG00000088826	SMOX	3340.54	-0.930574	0.0648551	-14.3485	1.0884e-46	9.00012e-45
ENSG00000088827	SIGLEC1	0.530258	-2.48814	3.61399	-0.688475	0.491154
ENSG00000088832	FKBP1A	13861	0.258687	0.0748937	3.45405	0.000552232	0.00267086
ENSG00000088833	NSFL1C	4895.4	0.213468	0.0595457	3.58495	0.000337145	0.00172326
ENSG00000088836	SLC4A11	404.768	0.570757	0.160485	3.55645	0.000375894	0.00189676
ENSG00000088854	C20orf194	330.552	-0.0676855	0.146329	-0.462558	0.643681	0.796357
ENSG00000088876	ZNF343	587.274	-0.186508	0.106678	-1.74832	0.080409	0.185534
ENSG00000088881	EBF4	63.8851	0.599882	0.318886	1.88118	0.0599471	0.147753
ENSG00000088882	CPXM1	0
ENSG00000088888	MAVS	5818.49	0.128008	0.0835044	1.53295	0.125289	0.260267
ENSG00000088899	LZTS3	483.877	0.401369	0.110924	3.61841	0.000296416	0.00153394
ENSG00000088926	F11	0
ENSG00000088930	XRN2	7857.4	-0.00625015	0.0498182	-0.125459	0.90016	0.95119
ENSG00000088970	KIZ	189.145	0.0283781	0.18103	0.156759	0.875435	0.937716
ENSG00000088986	DYNLL1	8484.07	0.151098	0.0644097	2.34589	0.0189816	0.0575753
ENSG00000088992	TESC	1541.05	-0.308136	0.0896749	-3.43614	0.000590067	0.00283182
ENSG00000089006	SNX5	7246.96	0.0226415	0.0494327	0.458027	0.646933	0.798691
ENSG00000089009	RPL6	34040.3	-0.421944	0.0606682	-6.95494	3.52717e-12	5.25548e-11
ENSG00000089012	SIRPG	0
ENSG00000089022	MAPKAPK5	1267.77	-0.0780422	0.088207	-0.884762	0.376285	0.571289
ENSG00000089041	P2RX7	5.55943	0.231522	1.01419	0.228283	0.819426	0.907847
ENSG00000089048	ESF1	1489.44	-0.27485	0.0712202	-3.85916	0.000113777	0.000647072
ENSG00000089050	RBBP9	1549.38	0.0466589	0.0718139	0.64972	0.515873	0.698859
ENSG00000089053	ANAPC5	4605.74	-0.0584915	0.0612421	-0.955087	0.339534	0.534602
ENSG00000089057	SLC23A2	3338.13	0.564492	0.0866732	6.51287	7.37288e-11	9.6878e-10
ENSG00000089060	SLC8B1	401.315	-0.051086	0.12936	-0.394912	0.692908	0.829766
ENSG00000089063	TMEM230	4902.82	0.178953	0.0579815	3.08638	0.00202609	0.00849484
ENSG00000089091	DZANK1	152.753	-0.024157	0.215907	-0.111886	0.910914	0.956578
ENSG00000089094	KDM2B	1223.94	0.0965734	0.0795311	1.21429	0.224639	0.400491
ENSG00000089101	CFAP61	11.8021	-0.935633	0.706366	-1.32457	0.185313	0.347812
ENSG00000089116	LHX5	0
ENSG00000089123	TASP1	386.214	0.0715859	0.122732	0.583271	0.559711	0.734012
ENSG00000089127	OAS1	6979.55	-0.483657	0.0517363	-9.34851	8.88884e-21	2.49361e-19
ENSG00000089154	GCN1	7985.59	-0.413772	0.0628394	-6.5846	4.56124e-11	6.0691e-10
ENSG00000089157	RPLP0	68248.1	-0.0936701	0.0741163	-1.26383	0.206293	0.376017
ENSG00000089159	PXN	7456.93	-0.121786	0.0478678	-2.54423	0.010952	0.0364698
ENSG00000089163	SIRT4	25.2026	0.0727389	0.486822	0.149416	0.881225	0.941125
ENSG00000089169	RPH3A	17.1923	-0.778047	0.590963	-1.31657	0.187981	0.351816
ENSG00000089177	KIF16B	1524.98	-0.0188407	0.0803923	-0.23436	0.814706	0.904821
ENSG00000089195	TRMT6	1507.09	-0.10949	0.0721907	-1.51667	0.129349	0.266702
ENSG00000089199	CHGB	363.497	0.407314	0.121827	3.34336	0.000827691	0.00382015
ENSG00000089220	PEBP1	8356.29	-0.22919	0.057767	-3.96749	7.26349e-05	0.000429661
ENSG00000089225	TBX5	0
ENSG00000089234	BRAP	965.488	-0.338953	0.0908728	-3.72998	0.000191498	0.00103793
ENSG00000089248	ERP29	6784.92	-0.284359	0.0525214	-5.41415	6.15807e-08	5.81702e-07
ENSG00000089250	NOS1	27.7995	-3.01728	0.541719	-5.56982	2.55003e-08	2.52193e-07
ENSG00000089280	FUS	12911.2	-0.159062	0.0591216	-2.69043	0.0071361	0.0252821
ENSG00000089289	IGBP1	1774.1	-0.102442	0.0710566	-1.44169	0.149389	0.296824
ENSG00000089327	FXYD5	4339.31	0.0671465	0.081779	0.821073	0.411605	0.603997
ENSG00000089335	ZNF302	816.695	-0.261957	0.0855539	-3.0619	0.0021994	0.00914142
ENSG00000089351	GRAMD1A	5916.46	0.245085	0.0585043	4.18917	2.79973e-05	0.000179242
ENSG00000089356	FXYD3	1.07991	-0.848136	2.36895	-0.358022	0.720327
ENSG00000089472	HEPH	0.157045	1.01599	4.08047	0.248987	0.803371
ENSG00000089486	CDIP1	191.949	0.31659	0.183422	1.72602	0.0843439	0.192671
ENSG00000089505	CMTM1	37.6814	0.135849	0.412422	0.329392	0.741859	0.861702
ENSG00000089558	KCNH4	14.6133	0.573291	0.579383	0.989485	0.322426	0.516418
ENSG00000089597	GANAB	19704.7	0.124294	0.044156	2.81488	0.00487953	0.018274
ENSG00000089639	GMIP	248.046	0.488773	0.158514	3.08347	0.00204602	0.00856929
ENSG00000089682	RBM41	520.906	0.211876	0.120499	1.75832	0.0786932	0.182615
ENSG00000089685	BIRC5	5644.46	0.0772316	0.0680878	1.13429	0.256672	0.440782
ENSG00000089692	LAG3	9.04351	0.721616	0.893278	0.807829	0.419189	0.611389
ENSG00000089693	MLF2	9482.8	-0.0233562	0.0634651	-0.368016	0.712861	0.842419
ENSG00000089723	OTUB2	283.276	1.40987	0.180467	7.81236	5.61261e-15	1.05909e-13
ENSG00000089737	DDX24	380.214	0.394426	0.637253	0.618948	0.535951	0.714149
ENSG00000089775	ZBTB25	395.318	0.19628	0.129233	1.51881	0.12881	0.265796
ENSG00000089818	NECAP1	1072.63	0.245923	0.12375	1.98726	0.0468937	0.121576
ENSG00000089820	ARHGAP4	20.8854	0.752043	0.491744	1.52934	0.126181	0.261638
ENSG00000089847	ANKRD24	13.171	0.533328	0.705489	0.755969	0.449668	0.640171
ENSG00000089876	DHX32	1825.48	0.108629	0.0662892	1.63871	0.101273	0.221509
ENSG00000089902	RCOR1	1900.58	-0.0799661	0.0928401	-0.861332	0.389055	0.583712
ENSG00000089916	GPATCH2L	986.328	-0.271667	0.134471	-2.02027	0.0433557	0.114108
ENSG00000090006	LTBP4	891.315	0.25126	0.11288	2.22591	0.0260203	0.0744636
ENSG00000090013	BLVRB	8010.04	0.202941	0.0602583	3.36785	0.000757563	0.00352844
ENSG00000090020	SLC9A1	848.515	0.313929	0.0910969	3.4461	0.00056874	0.00274113
ENSG00000090054	SPTLC1	2614.05	-0.49756	0.0659493	-7.54458	4.53736e-14	7.90112e-13
ENSG00000090060	PAPOLA	8908.91	-0.0533731	0.0547517	-0.974821	0.329649	0.524179
ENSG00000090061	CCNK	2483.06	-0.12728	0.0798356	-1.59427	0.110875	0.237092
ENSG00000090097	PCBP4	473.671	0.303324	0.131852	2.3005	0.0214202	0.0634728
ENSG00000090104	RGS1	0
ENSG00000090238	YPEL3	143.694	0.57168	0.205484	2.78212	0.00540054	0.0198965
ENSG00000090263	MRPS33	1853.58	-0.0403925	0.0792568	-0.509641	0.610303	0.773753
ENSG00000090266	NDUFB2	2420.35	-0.201187	0.0851431	-2.36293	0.0181312	0.0555184
ENSG00000090273	NUDC	5153.45	-0.150902	0.0690806	-2.18443	0.0289309	0.0813895
ENSG00000090316	MAEA	1816.52	0.0323007	0.072623	0.444772	0.656485	0.805509
ENSG00000090339	ICAM1	16.57	-0.64851	0.690042	-0.939813	0.347313	0.542097
ENSG00000090372	STRN4	4175.35	0.276065	0.0575261	4.79895	1.59496e-06	1.24338e-05
ENSG00000090376	IRAK3	6.932	-2.19341	0.955251	-2.29616	0.0216665	0.0640946
ENSG00000090382	LYZ	13.1317	-0.182094	0.648474	-0.280805	0.77886	0.88416
ENSG00000090402	SI	0
ENSG00000090432	MUL1	1657.5	0.00856302	0.0787824	0.108692	0.913447	0.957967
ENSG00000090447	TFAP4	528.739	-0.212522	0.141744	-1.49933	0.133787	0.273453
ENSG00000090470	PDCD7	939.22	-0.129527	0.0866719	-1.49445	0.135058	0.274939
ENSG00000090487	SPG21	4527.92	-0.199615	0.0545652	-3.65829	0.000253907	0.00133495
ENSG00000090512	FETUB	7.25097	0.40909	0.85222	0.480029	0.631207	0.788343
ENSG00000090520	DNAJB11	2384.23	0.339408	0.0597182	5.6835	1.31969e-08	1.34995e-07
ENSG00000090530	P3H2	1078.08	-0.729208	0.127505	-5.71905	1.07123e-08	1.11455e-07
ENSG00000090534	THPO	0.146803	-0.907567	4.08047	-0.222417	0.823989
ENSG00000090539	CHRD	4.8759	0.0145723	1.14487	0.0127284	0.989844	0.994694
ENSG00000090554	FLT3LG	67.3725	0.622949	0.302855	2.05692	0.0396937	0.10606
ENSG00000090565	RAB11FIP3	1045.62	0.340028	0.0990911	3.43147	0.000600322	0.00287492
ENSG00000090581	GNPTG	740.642	0.615668	0.112396	5.47766	4.30992e-08	4.14056e-07
ENSG00000090612	ZNF268	670.572	-0.343495	0.149818	-2.29276	0.021862	0.0645398
ENSG00000090615	GOLGA3	2306.2	-0.0841215	0.128999	-0.65211	0.51433	0.697395
ENSG00000090621	PABPC4	4307.6	-0.0597489	0.0751149	-0.795433	0.426362	0.617794
ENSG00000090659	CD209	0.94807	0.994338	2.64499	0.375932	0.706967
ENSG00000090661	CERS4	100.233	-0.716814	0.235829	-3.03956	0.00236928	0.00977288
ENSG00000090674	MCOLN1	573.398	0.462835	0.10932	4.23378	2.29798e-05	0.000149482
ENSG00000090686	USP48	1304.02	0.0785053	0.0760973	1.03164	0.302239	0.492979
ENSG00000090776	EFNB1	405.696	0.0534972	0.116277	0.460083	0.645457	0.797617
ENSG00000090857	PDPR	2389.27	0.0363425	0.091443	0.397433	0.691048	0.828481
ENSG00000090861	AARS1	14142.3	-0.607363	0.0555045	-10.9426	7.21169e-28	2.90565e-26
ENSG00000090863	GLG1	6752.01	0.00105651	0.0648559	0.0162902	0.987003	0.993725
ENSG00000090889	KIF4A	2899.12	0.161453	0.0586341	2.75358	0.00589479	0.0214719
ENSG00000090905	TNRC6A	2482.61	-0.0590236	0.106453	-0.55446	0.579264	0.749726
ENSG00000090924	PLEKHG2	1798.94	-0.159967	0.252061	-0.634637	0.525665	0.706148
ENSG00000090932	DLL3	302.693	0.100696	0.146024	0.689587	0.490454	0.676439
ENSG00000090971	NAT14	828.163	0.150433	0.0918576	1.63767	0.10149	0.221828
ENSG00000090975	PITPNM2	684.07	-0.870495	0.116306	-7.4845	7.18216e-14	1.23568e-12
ENSG00000090989	EXOC1	869.344	-0.145171	0.114274	-1.27037	0.203953	0.372872
ENSG00000091009	RBM27	1809.22	-0.0876321	0.0722045	-1.21367	0.224875	0.400686
ENSG00000091010	POU4F3	3.2166	1.57634	1.2776	1.23383	0.217265	0.391324
ENSG00000091039	OSBPL8	1978	-0.290977	0.0952638	-3.05444	0.00225484	0.00934478
ENSG00000091073	DTX2	2395.2	0.490834	0.078941	6.21773	5.04385e-10	6.14207e-09
ENSG00000091106	NLRC4	0
ENSG00000091127	PUS7	1291.99	-0.197439	0.0748313	-2.63846	0.00832831	0.0287954
ENSG00000091128	LAMB4	10.56	-0.0356631	0.908397	-0.0392594	0.968684	0.984327
ENSG00000091129	NRCAM	9566.79	0.178801	0.0759678	2.35364	0.0185904	0.0565845
ENSG00000091136	LAMB1	14591.5	0.214051	0.0673091	3.18011	0.00147217	0.00643728
ENSG00000091137	SLC26A4	8.69546	1.01995	0.747538	1.36441	0.172438	0.33012
ENSG00000091138	SLC26A3	0
ENSG00000091140	DLD	4076.06	-0.0931293	0.0720523	-1.29252	0.196176	0.362937
ENSG00000091157	WDR7	777.866	0.24668	0.165132	1.49383	0.135219	0.275141
ENSG00000091164	TXNL1	2311.6	-0.15443	0.0736652	-2.09637	0.0360494	0.0977388
ENSG00000091181	IL5RA	0
ENSG00000091262	ABCC6	9.52882	-1.28011	0.787991	-1.62452	0.104264	0.226202
ENSG00000091317	CMTM6	3507.33	-0.232633	0.0530316	-4.38669	1.1509e-05	7.85873e-05
ENSG00000091409	ITGA6	5130.96	0.0587159	0.0639001	0.918871	0.358163	0.553235
ENSG00000091428	RAPGEF4	10.1119	-1.34028	0.835828	-1.60353	0.108817	0.233513
ENSG00000091436	MAP3K20	3428.11	-0.709877	0.0706003	-10.0549	8.74324e-24	2.87689e-22
ENSG00000091482	SMPX	0.155593	1.01599	4.08047	0.248987	0.803371
ENSG00000091483	FH	3011.83	-0.0403716	0.0647526	-0.623475	0.532973	0.711742
ENSG00000091490	SEL1L3	2729.21	-0.0884628	0.0768513	-1.15109	0.249695	0.431475
ENSG00000091513	TF	84.7568	-0.795616	0.430599	-1.8477	0.0646463	0.156984
ENSG00000091527	CDV3	5263.27	-0.243309	0.0568853	-4.27718	1.89272e-05	0.000124817
ENSG00000091536	MYO15A	2.01158	-0.871803	1.73844	-0.501487	0.616029
ENSG00000091542	ALKBH5	5114.99	0.231553	0.0548793	4.21931	2.45053e-05	0.000158817
ENSG00000091583	APOH	477.731	1.10059	0.112283	9.80198	1.10404e-22	3.44608e-21
ENSG00000091592	NLRP1	5.51268	0.398815	1.08517	0.367513	0.713236	0.842547
ENSG00000091622	PITPNM3	119.266	0.50285	0.22956	2.19049	0.0284885	0.0803764
ENSG00000091640	SPAG7	2001.58	0.308559	0.0631055	4.88957	1.01057e-06	8.07743e-06
ENSG00000091651	ORC6	1107.86	-0.00770884	0.0861899	-0.0894402	0.928732	0.965186
ENSG00000091656	ZFHX4	401.706	0.128618	0.196664	0.653995	0.513115	0.696172
ENSG00000091664	SLC17A6	0
ENSG00000091704	CPA1	0
ENSG00000091732	ZC3HC1	1089.23	-0.0248632	0.0819281	-0.303476	0.761527	0.874223
ENSG00000091831	ESR1	0
ENSG00000091844	RGS17	474.266	0.221207	0.109569	2.01889	0.0434983	0.114445
ENSG00000091879	ANGPT2	1.57882	-0.424983	2.00953	-0.211484	0.83251
ENSG00000091947	TMEM101	1592.62	-0.0452901	0.084326	-0.537084	0.59121	0.759223
ENSG00000091972	CD200	2.94137	-0.97541	1.25551	-0.776902	0.437217	0.627649
ENSG00000091986	CCDC80	1908.48	0.656848	0.105292	6.23836	4.42175e-10	5.40117e-09
ENSG00000092009	CMA1	0
ENSG00000092010	PSME1	5178.14	-0.083701	0.0641475	-1.30482	0.191954	0.357134
ENSG00000092020	PPP2R3C	557.399	-0.105111	0.104299	-1.00778	0.313559	0.506221
ENSG00000092036	HAUS4	1358.65	0.33379	0.0697195	4.78761	1.68778e-06	1.30992e-05
ENSG00000092051	JPH4	1.34274	3.89674	2.23568	1.74298	0.081338
ENSG00000092054	MYH7	0
ENSG00000092067	CEBPE	0.146803	-0.907567	4.08047	-0.222417	0.823989
ENSG00000092068	SLC7A8	10.1452	-1.02399	0.887886	-1.15329	0.248792	0.430244
ENSG00000092094	OSGEP	834.462	0.236969	0.101796	2.32789	0.0199181	0.0598413
ENSG00000092096	SLC22A17	245.325	0.476019	0.160709	2.962	0.00305649	0.0121751
ENSG00000092098	RNF31	1660.17	0.432403	0.0981357	4.40618	1.0521e-05	7.2216e-05
ENSG00000092108	SCFD1	1692.72	0.0279562	0.0712659	0.39228	0.694851	0.831059
ENSG00000092140	G2E3	1171.12	0.103866	0.113036	0.918879	0.358159	0.553235
ENSG00000092148	HECTD1	5153.53	-0.00497566	0.0619902	-0.0802653	0.936026	0.968718
ENSG00000092199	HNRNPC	28585.8	-0.0368121	0.041968	-0.877145	0.380408	0.574833
ENSG00000092200	RPGRIP1	28.6282	-0.0939835	0.583375	-0.161103	0.872012	0.936438
ENSG00000092201	SUPT16H	9164.51	-0.0178044	0.0505589	-0.352151	0.724725	0.849893
ENSG00000092203	TOX4	2352.08	-0.0697744	0.0730418	-0.955267	0.339443	0.534512
ENSG00000092208	GEMIN2	502.823	0.240082	0.123328	1.94669	0.0515723	0.130996
ENSG00000092295	TGM1	16.2124	0.54829	0.577521	0.949385	0.342425	0.537567
ENSG00000092330	TINF2	1273.69	0.0128973	0.0863278	0.1494	0.881238	0.941125
ENSG00000092345	DAZL	0
ENSG00000092377	TBL1Y	0.400911	2.12245	4.02081	0.527865	0.597593
ENSG00000092421	SEMA6A	6.23454	4.4402	1.48176	2.99657	0.00273035	0.0110686
ENSG00000092439	TRPM7	2282.18	-0.378719	0.0931264	-4.06672	4.76793e-05	0.000291992
ENSG00000092445	TYRO3	612.521	-0.413439	0.115121	-3.59135	0.000328974	0.00168476
ENSG00000092470	WDR76	1105.11	0.0949703	0.093435	1.01643	0.309424	0.501338
ENSG00000092529	CAPN3	6.21413	1.3265	0.872349	1.5206	0.12836	0.264974
ENSG00000092531	SNAP23	1223.65	0.260873	0.0857599	3.04191	0.00235086	0.00970705
ENSG00000092607	TBX15	1.70365	2.29753	1.91939	1.19701	0.231302
ENSG00000092621	PHGDH	2311.39	-1.14551	0.0878337	-13.0418	7.07325e-39	4.57848e-37
ENSG00000092758	COL9A3	1.73624	1.42499	1.81651	0.784466	0.432767
ENSG00000092820	EZR	16606.5	0.0354109	0.0438182	0.808132	0.419014	0.611309
ENSG00000092841	MYL6	26784.1	0.0495153	0.0797603	0.620802	0.53473	0.713244
ENSG00000092847	AGO1	1205.54	-0.0749454	0.0731102	-1.0251	0.305315	0.496769
ENSG00000092850	TEKT2	0
ENSG00000092853	CLSPN	1581.46	-0.00627649	0.0949486	-0.066104	0.947295	0.974315
ENSG00000092871	RFFL	2235.98	-0.255267	0.0742206	-3.43931	0.000583202	0.00280228
ENSG00000092929	UNC13D	2084.19	4.12786	0.0840982	49.0838	0	0
ENSG00000092931	MFSD11	664.605	0.0870205	0.0946571	0.919324	0.357926	0.553031
ENSG00000092964	DPYSL2	6947.24	0.0155731	0.04873	0.31958	0.749287	0.866406
ENSG00000092969	TGFB2	2954.24	0.223451	0.0603651	3.70166	0.000214192	0.00114715
ENSG00000092978	GPATCH2	597.783	-0.145371	0.113999	-1.2752	0.202238	0.370475
ENSG00000093000	NUP50	2158.82	0.0311426	0.0855562	0.364002	0.715856	0.844127
ENSG00000093009	CDC45	1234.14	0.141106	0.0931225	1.51527	0.129704	0.26733
ENSG00000093010	COMT	3084.85	0.21101	0.0729575	2.89224	0.00382507	0.0148144
ENSG00000093072	ADA2	5.47704	-0.220566	1.14774	-0.192174	0.847606	0.922166
ENSG00000093134	VNN3	0.185477	-0.907567	4.08047	-0.222417	0.823989
ENSG00000093144	ECHDC1	1757.03	-0.158782	0.0814701	-1.94897	0.0512994	0.13045
ENSG00000093167	LRRFIP2	1682.43	-0.0360988	0.0774435	-0.46613	0.641122	0.794716
ENSG00000093183	SEC22C	1495.38	0.0117086	0.0781403	0.149841	0.88089	0.941117
ENSG00000093217	XYLB	531.43	0.484353	0.135458	3.57568	0.000349322	0.00177859
ENSG00000094631	HDAC6	1179.69	-0.0855613	0.13744	-0.622535	0.53359	0.712386
ENSG00000094661	OR1I1	4.52906	-0.0499943	1.03231	-0.0484297	0.961374	0.981001
[truncated: 33,101 more rows]

## Sheet: WT-A549-induced-vs-uninduced
Ensembl Gene ID	Gene symbol	BaseMean	log2(FC)	StdErr	Wald-Stats	P-value	P-adj
ENSG00000000003	TSPAN6	1920.35	-0.0579087	0.0732021	-0.791079	0.428898	0.950699
ENSG00000000005	TNMD	0
ENSG00000000419	DPM1	1438.63	-0.121974	0.0826615	-1.47559	0.140054	0.762608
ENSG00000000457	SCYL3	251.147	0.168731	0.148335	1.1375	0.255329	0.874746
ENSG00000000460	C1orf112	737.334	-0.00257428	0.0987051	-0.0260805	0.979193	0.99917
ENSG00000000938	FGR	0
ENSG00000000971	CFH	1797.62	0.719625	0.0921102	7.81265	5.59965e-15	9.29015e-13
ENSG00000001036	FUCA2	2803.46	-0.00917322	0.0630964	-0.145384	0.884408	0.992118
ENSG00000001084	GCLC	9847.43	-0.0519566	0.0622694	-0.834384	0.404064	0.939384
ENSG00000001167	NFYA	934.258	-0.0390107	0.0832377	-0.468667	0.639308	0.978787
ENSG00000001460	STPG1	345.046	0.123825	0.131681	0.940343	0.347042	0.921052
ENSG00000001461	NIPAL3	717.831	0.0718957	0.103094	0.697378	0.485566	0.960235
ENSG00000001497	LAS1L	4407.51	0.0200696	0.0651836	0.307894	0.758163	0.984508
ENSG00000001561	ENPP4	199.365	-0.268675	0.171325	-1.56822	0.116831	0.72166
ENSG00000001617	SEMA3F	215.892	0.110117	0.191517	0.574969	0.565312	0.97553
ENSG00000001626	CFTR	4.45614	-1.2655	1.24628	-1.01543	0.309903
ENSG00000001629	ANKIB1	2393.5	0.16611	0.106678	1.55711	0.119444	0.728439
ENSG00000001630	CYP51A1	5762.39	0.0374691	0.0485247	0.772165	0.440017	0.956485
ENSG00000001631	KRIT1	956.869	-0.182605	0.123676	-1.47648	0.139814	0.762436
ENSG00000002016	RAD52	317.18	0.022924	0.157253	0.145777	0.884097	0.992118
ENSG00000002079	MYH16	15.8468	0.0375545	0.624186	0.0601655	0.952024	0.998617
ENSG00000002330	BAD	1216.69	-0.277606	0.0955139	-2.90645	0.0036556	0.124821
ENSG00000002549	LAP3	2960.23	1.45141	0.0640861	22.6479	1.46452e-113	1.14737e-110
ENSG00000002586	CD99	5987.13	-0.0178613	0.0793228	-0.225173	0.821845	0.988254
ENSG00000002587	HS3ST1	94.2769	-0.621664	0.357548	-1.73869	0.0820897	0.631611
ENSG00000002726	AOC1	0.154163	0.786103	4.08047	0.19265	0.847233
ENSG00000002745	WNT16	0
ENSG00000002746	HECW1	385.665	-0.0292146	0.160866	-0.181609	0.85589	0.988254
ENSG00000002822	MAD1L1	616.007	-0.0580133	0.111213	-0.521643	0.601919	0.978787
ENSG00000002834	LASP1	38785.3	-0.0435085	0.0417712	-1.04159	0.297601	0.903021
ENSG00000002919	SNX11	982.607	0.0312045	0.0919734	0.339278	0.7344	0.980928
ENSG00000002933	TMEM176A	0.330524	1.73797	4.03561	0.430659	0.666716
ENSG00000003056	M6PR	10596.1	0.0244822	0.0626137	0.391003	0.695795	0.978787
ENSG00000003096	KLHL13	64.9658	-0.101522	0.332934	-0.304932	0.760418	0.984508
ENSG00000003137	CYP26B1	567.337	-0.00679809	0.127529	-0.0533062	0.957488	0.998849
ENSG00000003147	ICA1	93.606	0.0676353	0.346473	0.195211	0.845228	0.988254
ENSG00000003249	DBNDD1	1867.97	0.0446428	0.071923	0.620702	0.534796	0.970492
ENSG00000003393	ALS2	1384.44	-0.265545	0.113313	-2.34346	0.0191059	0.335616
ENSG00000003400	CASP10	343.679	0.17822	0.144691	1.23173	0.218051	0.842916
ENSG00000003402	CFLAR	3091.6	0.0162765	0.0669836	0.242993	0.808011	0.988254
ENSG00000003436	TFPI	2031.88	0.0794484	0.0734174	1.08215	0.279187	0.895042
ENSG00000003509	NDUFAF7	744.633	0.0384131	0.101521	0.378376	0.705151	0.97897
ENSG00000003756	RBM5	1035.63	-0.109614	0.124191	-0.882625	0.377439	0.92839
ENSG00000003987	MTMR7	0.318079	1.69837	4.03665	0.420738	0.673947
ENSG00000003989	SLC7A2	211.475	-0.110535	0.180937	-0.610904	0.541263	0.972543
ENSG00000004059	ARF5	2650.75	-0.0715328	0.0893481	-0.800608	0.423358	0.949006
ENSG00000004139	SARM1	515.569	0.244875	0.124039	1.97419	0.0483605	0.517043
ENSG00000004142	POLDIP2	7367.53	0.0623835	0.0563406	1.10726	0.268183	0.885421
ENSG00000004399	PLXND1	2599.01	0.399988	0.130182	3.07254	0.00212247	0.0867207
ENSG00000004455	AK2	4915.63	-0.00585044	0.0552267	-0.105935	0.915634	0.996282
ENSG00000004468	CD38	671.923	0.150791	0.112167	1.34435	0.178836	0.810507
ENSG00000004478	FKBP4	10224.2	-0.0530168	0.0470536	-1.12673	0.259856	0.877931
ENSG00000004487	KDM1A	3219.66	0.00734768	0.0570285	0.128842	0.897482	0.994046
ENSG00000004534	RBM6	1090.93	-0.0566805	0.0872391	-0.649715	0.515876	0.965501
ENSG00000004660	CAMKK1	570.027	0.136946	0.109453	1.25119	0.210864	0.839054
ENSG00000004700	RECQL	3212.53	-0.100029	0.0852849	-1.17288	0.240842	0.860957
ENSG00000004766	VPS50	788.17	0.0553031	0.109662	0.504304	0.614048	0.978787
ENSG00000004776	HSPB6	6.89064	0.446296	0.830271	0.537531	0.590901
ENSG00000004777	ARHGAP33	178.142	-0.675754	0.219829	-3.074	0.0021121	0.0865839
ENSG00000004779	NDUFAB1	2023.04	-0.0464405	0.0887713	-0.523148	0.600872	0.978787
ENSG00000004799	PDK4	1624.95	0.178709	0.0863064	2.07064	0.0383928	0.472062
ENSG00000004809	SLC22A16	0
ENSG00000004838	ZMYND10	13.2197	0.0910043	0.670985	0.135628	0.892115	0.99318
ENSG00000004846	ABCB5	3.96938	-0.388273	1.31893	-0.294384	0.768464
ENSG00000004848	ARX	56.226	0.456257	0.432258	1.05552	0.291187	0.899129
ENSG00000004864	SLC25A13	2704.24	-0.0229708	0.070519	-0.325739	0.744622	0.981271
ENSG00000004866	ST7	920.746	0.0169993	0.094047	0.180753	0.856561	0.988254
ENSG00000004897	CDC27	5546.73	-0.0681947	0.0867074	-0.786493	0.431579	0.950699
ENSG00000004939	SLC4A1	1.95929	-0.477167	1.52999	-0.311876	0.755135
ENSG00000004948	CALCR	0.964808	1.71	2.5889	0.660511	0.508926
ENSG00000004961	HCCS	1889.57	-0.0246914	0.066938	-0.36887	0.712225	0.979118
ENSG00000004975	DVL2	1923.25	0.0338473	0.0652963	0.518365	0.604204	0.978787
ENSG00000005001	PRSS22	2.1956	0.555607	1.77413	0.313172	0.75415
ENSG00000005007	UPF1	2571.51	0.000861888	0.0585478	0.0147211	0.988255	0.99917
ENSG00000005020	SKAP2	1989.47	-0.138004	0.067456	-2.04584	0.0407725	0.482496
ENSG00000005022	SLC25A5	21191.5	0.0172756	0.0600177	0.287842	0.773468	0.986206
ENSG00000005059	MCUB	567.662	-0.34392	0.137705	-2.4975	0.0125071	0.266
ENSG00000005073	HOXA11	16.1019	-0.262792	0.546443	-0.480914	0.630578	0.978787
ENSG00000005075	POLR2J	1886.16	0.0936837	0.0990082	0.946222	0.344036	0.920918
ENSG00000005100	DHX33	2797.62	-0.0686024	0.091025	-0.753666	0.45105	0.956485
ENSG00000005102	MEOX1	0.18421	-1.13745	4.08047	-0.278754	0.780433
ENSG00000005108	THSD7A	779.355	-0.0453848	0.117394	-0.386601	0.699051	0.978787
ENSG00000005156	LIG3	2251.15	-0.0886728	0.0848847	-1.04463	0.296195	0.902118
ENSG00000005175	RPAP3	2234.85	-0.124353	0.0802786	-1.54902	0.121376	0.731355
ENSG00000005187	ACSM3	331.753	0.174205	0.145106	1.20054	0.229932	0.853042
ENSG00000005189	REXO5	168.959	-0.118085	0.18647	-0.633266	0.52656	0.968466
ENSG00000005194	CIAPIN1	2249.37	0.048516	0.0690566	0.702554	0.482334	0.959091
ENSG00000005206	SPPL2B	389.506	-0.0742829	0.131996	-0.562765	0.573595	0.977092
ENSG00000005238	FAM214B	395.049	0.0478348	0.12748	0.375233	0.707488	0.97905
ENSG00000005243	COPZ2	127.334	0.285814	0.20253	1.41122	0.158181	0.791551
ENSG00000005249	PRKAR2B	384.177	-0.0208823	0.120073	-0.173913	0.861934	0.988254
ENSG00000005302	MSL3	1092.77	-0.0263382	0.080873	-0.325673	0.744672	0.981271
ENSG00000005339	CREBBP	2610.85	0.0227526	0.0914991	0.248665	0.80362	0.988254
ENSG00000005379	TSPOAP1	0.357926	-2.03953	4.03913	-0.504942	0.6136
ENSG00000005381	MPO	0
ENSG00000005421	PON1	5.30727	0.687664	1.16341	0.591074	0.554471
ENSG00000005436	GCFC2	495.284	-0.175914	0.10807	-1.62778	0.103572	0.689731
ENSG00000005448	WDR54	1525.34	0.116545	0.0750942	1.55198	0.120667	0.730903
ENSG00000005469	CROT	581.687	-0.136075	0.109565	-1.24196	0.214252	0.841557
ENSG00000005471	ABCB4	2.60825	0.844042	1.4927	0.565448	0.571769
ENSG00000005483	KMT2E	1893.58	-0.00142147	0.109936	-0.01293	0.989684	0.99917
ENSG00000005486	RHBDD2	1692.47	0.173935	0.0989822	1.75724	0.0788774	0.621173
ENSG00000005513	SOX8	12.8591	0.480732	0.629851	0.763247	0.445316	0.956485
ENSG00000005700	IBTK	4887.06	0.018526	0.0809396	0.228886	0.818957	0.988254
ENSG00000005801	ZNF195	610.025	-0.0630628	0.100537	-0.627256	0.530491	0.969637
ENSG00000005810	MYCBP2	1459.29	0.0712823	0.291973	0.24414	0.807122	0.988254
ENSG00000005812	FBXL3	947.444	-0.0585992	0.0838342	-0.698989	0.484559	0.95981
ENSG00000005844	ITGAL	24.2776	0.187497	0.572796	0.327337	0.743413	0.981271
ENSG00000005882	PDK2	449.912	0.122554	0.140074	0.874926	0.381614	0.932044
ENSG00000005884	ITGA3	32556.9	0.0669548	0.0483881	1.3837	0.16645	0.801359
ENSG00000005889	ZFX	1085.27	0.0130974	0.0791594	0.165456	0.868585	0.990281
ENSG00000005893	LAMP2	6522.82	-0.0363428	0.0526762	-0.68993	0.490238	0.961023
ENSG00000005961	ITGA2B	31.7315	-0.664697	0.408226	-1.62826	0.103471	0.689659
ENSG00000005981	ASB4	53.3627	0.626296	0.328091	1.90891	0.056274	0.548808
ENSG00000006007	GDE1	4111.1	0.0466223	0.0569732	0.81832	0.413174	0.945449
ENSG00000006015	REX1BD	316.862	-0.187139	0.141472	-1.3228	0.185903	0.817758
ENSG00000006016	CRLF1	8.05827	-1.40215	0.791987	-1.77042	0.0766564	0.614908
ENSG00000006025	OSBPL7	217.945	-0.219866	0.189258	-1.16173	0.245346	0.865551
ENSG00000006042	TMEM98	1143.67	0.0155209	0.079359	0.195578	0.84494	0.988254
ENSG00000006047	YBX2	7.21573	-0.275324	0.982879	-0.28012	0.779385
ENSG00000006059	KRT33A	0
ENSG00000006062	MAP3K14	4787.39	-0.159892	0.0625382	-2.55672	0.0105665	0.241898
ENSG00000006071	ABCC8	36.9434	-0.36775	0.428693	-0.857842	0.39098	0.934964
ENSG00000006116	CACNG3	0
ENSG00000006118	TMEM132A	3357.28	0.124025	0.0740571	1.67472	0.0939882	0.667729
ENSG00000006125	AP2B1	21209.4	-0.0112899	0.0476679	-0.236845	0.812777	0.988254
ENSG00000006128	TAC1	0
ENSG00000006194	ZNF263	1197.15	0.151398	0.0945248	1.60167	0.109228	0.706425
ENSG00000006210	CX3CL1	9.18291	1.58573	0.748245	2.11926	0.0340681	0.448096
ENSG00000006282	SPATA20	3076.2	0.0538306	0.0565085	0.952611	0.340787	0.919943
ENSG00000006283	CACNA1G	561.885	-0.155306	0.145866	-1.06472	0.287003	0.89584
ENSG00000006327	TNFRSF12A	5613.09	-0.154887	0.0767088	-2.01916	0.0434705	0.494771
ENSG00000006377	DLX6	1.69217	-1.58238	1.7289	-0.915251	0.36006
ENSG00000006432	MAP3K9	1118.02	-0.129078	0.0947066	-1.36292	0.172907	0.805158
ENSG00000006451	RALA	1137.39	-0.22248	0.0934166	-2.38159	0.0172382	0.318185
ENSG00000006453	BAIAP2L1	3044.19	0.0150392	0.0708858	0.212161	0.831981	0.988254
ENSG00000006459	KDM7A	156.506	0.0748148	0.192076	0.389505	0.696902	0.978787
ENSG00000006468	ETV1	319.913	-0.410531	0.156019	-2.63129	0.00850613	0.211003
ENSG00000006530	AGK	1402.94	-0.139293	0.0784948	-1.77455	0.075973	0.61278
ENSG00000006534	ALDH3B1	6803.94	0.17507	0.0630029	2.77877	0.00545654	0.160979
ENSG00000006555	TTC22	0.183683	-1.13745	4.08047	-0.278754	0.780433
ENSG00000006576	PHTF2	1180.23	-0.18716	0.0980399	-1.90901	0.0562602	0.548808
ENSG00000006606	CCL26	58.7315	0.074461	0.309752	0.24039	0.810028	0.988254
ENSG00000006607	FARP2	1175.53	0.030203	0.108835	0.277512	0.781387	0.986372
ENSG00000006611	USH1C	29.0593	0.474955	0.41637	1.1407	0.253993	0.873612
ENSG00000006625	GGCT	1831.41	-0.0431382	0.0705047	-0.611849	0.540638	0.972543
ENSG00000006634	DBF4	1276.01	-0.139085	0.0853882	-1.62885	0.103344	0.689659
ENSG00000006638	TBXA2R	26.544	-0.37497	0.499361	-0.7509	0.452713	0.956485
ENSG00000006652	IFRD1	1486.52	-0.00198192	0.0738265	-0.0268456	0.978583	0.99917
ENSG00000006659	LGALS14	0
ENSG00000006695	COX10	974.055	0.0572397	0.0892548	0.641307	0.521323	0.966312
ENSG00000006704	GTF2IRD1	651.515	0.0675356	0.0988738	0.683048	0.494577	0.962643
ENSG00000006712	PAF1	3204.3	-0.0220388	0.0669524	-0.329172	0.742026	0.981271
ENSG00000006715	VPS41	2132.79	-0.0219096	0.0703481	-0.311445	0.755462	0.983766
ENSG00000006740	ARHGAP44	329.284	-0.1119	0.133833	-0.836116	0.403089	0.939343
ENSG00000006744	ELAC2	5185.21	-0.0841247	0.0529186	-1.5897	0.111903	0.710732
ENSG00000006747	SCIN	21.4427	0.242743	0.586357	0.413985	0.678885	0.978787
ENSG00000006756	ARSD	796.297	0.0174269	0.108922	0.159994	0.872886	0.990887
ENSG00000006757	PNPLA4	323.69	-0.169678	0.14528	-1.16794	0.242832	0.862121
ENSG00000006788	MYH13	0
ENSG00000006831	ADIPOR2	5459.74	0.0244266	0.0526429	0.464005	0.642644	0.978787
ENSG00000006837	CDKL3	35.8117	0.359253	0.383584	0.93657	0.34898	0.921052
ENSG00000007001	UPP2	0.164241	-1.13745	4.08047	-0.278754	0.780433
ENSG00000007038	PRSS21	3.47485	-0.119251	1.23345	-0.0966808	0.92298
ENSG00000007047	MARK4	446.455	-0.0863428	0.170049	-0.507753	0.611626	0.978787
ENSG00000007062	PROM1	2.56754	-0.381817	1.49318	-0.255708	0.798177
ENSG00000007080	CCDC124	1822.68	-0.177057	0.0805893	-2.19703	0.0280186	0.404992
ENSG00000007129	CEACAM21	0
ENSG00000007168	PAFAH1B1	7001.55	-0.0292562	0.0610421	-0.47928	0.63174	0.978787
ENSG00000007171	NOS2	10.1048	-0.457082	0.682122	-0.670088	0.502802	0.964427
ENSG00000007174	DNAH9	1.30429	0.40714	2.09948	0.193925	0.846235
ENSG00000007202	KIAA0100	10800.3	-0.0211719	0.0611166	-0.346418	0.729029	0.980386
ENSG00000007216	SLC13A2	3.19877	-0.30038	1.19573	-0.251211	0.801651
ENSG00000007237	GAS7	60.0288	0.827315	0.393158	2.10428	0.0353539	0.456208
ENSG00000007255	TRAPPC6A	480.61	0.0122961	0.132105	0.0930785	0.925841	0.996509
ENSG00000007264	MATK	3.44979	0.0834804	1.31516	0.0634754	0.949388
ENSG00000007306	CEACAM7	1.33	-0.794004	2.1504	-0.369235	0.711952
ENSG00000007312	CD79B	1.37262	0.545381	2.12284	0.256911	0.797247
ENSG00000007314	SCN4A	6.24266	1.41451	1.03095	1.37205	0.170048
ENSG00000007341	ST7L	230.054	-0.161564	0.171672	-0.941117	0.346645	0.920946
ENSG00000007350	TKTL1	0
ENSG00000007372	PAX6	46.6293	-0.0878896	0.352398	-0.249404	0.803048	0.988254
ENSG00000007376	RPUSD1	1033.57	-0.0195904	0.0898283	-0.218087	0.827362	0.988254
ENSG00000007384	RHBDF1	490.207	0.0602469	0.118935	0.506556	0.612467	0.978787
ENSG00000007392	LUC7L	922.202	-0.12491	0.110378	-1.13165	0.25778	0.876589
ENSG00000007402	CACNA2D2	21.4133	-0.0326164	0.482632	-0.0675803	0.94612	0.998156
ENSG00000007516	BAIAP3	29.5994	-0.781959	0.594147	-1.3161	0.188139	0.820643
ENSG00000007520	TSR3	1431.11	-0.0657036	0.0810091	-0.811064	0.417329	0.946928
ENSG00000007541	PIGQ	1083.81	0.11986	0.0942707	1.27144	0.203572	0.834887
ENSG00000007545	CRAMP1	889.137	-0.202251	0.154708	-1.3073	0.19111	0.823556
ENSG00000007866	TEAD3	210.96	0.167675	0.163809	1.0236	0.306023	0.908675
ENSG00000007908	SELE	0
ENSG00000007923	DNAJC11	2297.59	0.0309643	0.0638303	0.485103	0.627603	0.978787
ENSG00000007933	FMO3	2.02784	0.867867	1.84369	0.470724	0.637838
ENSG00000007944	MYLIP	161.943	-0.00112864	0.186775	-0.00604279	0.995179	0.99917
ENSG00000007952	NOX1	13.362	0.146635	0.594375	0.246704	0.805137	0.988254
ENSG00000007968	E2F2	525.207	0.163857	0.107618	1.52259	0.127862	0.743453
ENSG00000008018	PSMB1	4682.27	0.0264269	0.0609899	0.4333	0.664797	0.978787
ENSG00000008056	SYN1	4.05414	0.375737	1.23926	0.303194	0.761742
ENSG00000008083	JARID2	641.693	-0.054262	0.0997682	-0.54388	0.586524	0.977163
ENSG00000008086	CDKL5	1532.51	0.125185	0.131963	0.948634	0.342807	0.920918
ENSG00000008118	CAMK1G	1.77727	1.12739	1.79857	0.626823	0.530775
ENSG00000008128	CDK11A	610.585	0.108238	0.113363	0.954794	0.339682	0.919531
ENSG00000008130	NADK	1376.31	0.152684	0.0910276	1.67734	0.0934766	0.66509
ENSG00000008196	TFAP2B	0
ENSG00000008197	TFAP2D	0
ENSG00000008226	DLEC1	0.154163	0.786103	4.08047	0.19265	0.847233
ENSG00000008256	CYTH3	1817.93	0.0177187	0.0806429	0.219719	0.82609	0.988254
ENSG00000008277	ADAM22	79.9271	-0.0380676	0.401637	-0.0947812	0.924489	0.996453
ENSG00000008282	SYPL1	4658.03	-0.0241497	0.0535331	-0.451117	0.651905	0.978787
ENSG00000008283	CYB561	1295.62	-0.0645402	0.0906381	-0.712065	0.476425	0.957458
ENSG00000008294	SPAG9	6678.22	-0.0597062	0.0556566	-1.07276	0.283378	0.89584
ENSG00000008300	CELSR3	463.757	0.15974	0.11372	1.40468	0.160118	0.793667
ENSG00000008311	AASS	17.4075	-0.283831	0.568772	-0.499024	0.617763	0.978787
ENSG00000008323	PLEKHG6	2.47881	-0.815063	1.37461	-0.592941	0.553221
ENSG00000008324	SS18L2	261.777	0.113395	0.157029	0.722128	0.470215	0.956485
ENSG00000008382	MPND	193.843	0.139184	0.192811	0.72187	0.470374	0.956485
ENSG00000008394	MGST1	15461.8	0.129956	0.0641607	2.02547	0.0428186	0.491317
ENSG00000008405	CRY1	682.185	-0.106568	0.10338	-1.03083	0.302619	0.907407
ENSG00000008438	PGLYRP1	0
ENSG00000008441	NFIX	352.882	0.283133	0.139109	2.03534	0.0418169	0.48605
ENSG00000008513	ST3GAL1	666.388	0.0367271	0.139715	0.262871	0.79265	0.988225
ENSG00000008516	MMP25	7.09654	0.125209	0.838595	0.149308	0.881311
ENSG00000008517	IL32	170.543	0.12215	0.195441	0.624996	0.531974	0.969642
ENSG00000008710	PKD1	1099.03	0.0891115	0.118224	0.753754	0.450997	0.956485
ENSG00000008735	MAPK8IP2	320.011	0.515445	0.139313	3.69991	0.000215679	0.0144147
ENSG00000008838	MED24	2791.48	-0.00994225	0.058718	-0.169322	0.865543	0.988903
ENSG00000008853	RHOBTB2	1462.81	0.0693894	0.0757473	0.916065	0.359633	0.923106
ENSG00000008869	HEATR5B	931.605	-0.21225	0.0910757	-2.33048	0.019781	0.34057
ENSG00000008952	SEC62	4714.81	-0.243877	0.0693657	-3.51582	0.000438404	0.026308
ENSG00000008988	RPS20	19038.2	-0.0695127	0.0658421	-1.05575	0.291083	0.899004
ENSG00000009307	CSDE1	13086.6	-0.151066	0.0543603	-2.77898	0.00545304	0.160979
ENSG00000009335	UBE3C	5873.69	-0.0689586	0.0557713	-1.23645	0.21629	0.842849
ENSG00000009413	REV3L	877.305	-0.00710577	0.113335	-0.0626968	0.950008	0.998531
ENSG00000009694	TENM1	0.29517	1.60643	4.04511	0.397128	0.691273
ENSG00000009709	PAX7	51.7802	0.374223	0.342602	1.0923	0.274702	0.89136
ENSG00000009724	MASP2	0.29542	1.60729	4.04508	0.397343	0.691114
ENSG00000009765	IYD	6.02214	-0.471201	0.91708	-0.513806	0.607388
ENSG00000009780	FAM76A	221.813	0.146316	0.183448	0.797588	0.42511	0.949315
ENSG00000009790	TRAF3IP3	0
ENSG00000009830	POMT2	1438.25	0.104479	0.0851688	1.22673	0.219924	0.843502
ENSG00000009844	VTA1	2022.82	-0.0714044	0.0616717	-1.15781	0.24694	0.866255
ENSG00000009950	MLXIPL	42.9212	0.240174	0.390149	0.615596	0.538161	0.971662
ENSG00000009954	BAZ1B	6700.25	-0.0316083	0.0624278	-0.506318	0.612634	0.978787
ENSG00000010017	RANBP9	885.781	0.074203	0.0872622	0.850345	0.395133	0.935684
ENSG00000010030	ETV7	4.10397	2.33985	1.26795	1.84538	0.0649828
ENSG00000010072	SPRTN	704.529	-0.34524	0.112564	-3.06704	0.0021619	0.0878592
ENSG00000010165	EEF1AKNMT	3141.74	0.0374673	0.0733424	0.510854	0.609453	0.978787
ENSG00000010219	DYRK4	515.956	-0.109218	0.116242	-0.939572	0.347437	0.921052
ENSG00000010244	ZNF207	6739.33	0.0272797	0.048016	0.568137	0.569942	0.976555
ENSG00000010256	UQCRC1	4999.65	0.0489838	0.0654629	0.748268	0.454298	0.956485
ENSG00000010270	STARD3NL	1796.45	-0.0361767	0.068062	-0.531525	0.595055	0.978787
ENSG00000010278	CD9	3898.93	0.0508316	0.0663638	0.765954	0.443704	0.956485
ENSG00000010282	HHATL	0
ENSG00000010292	NCAPD2	7972.93	0.0121511	0.0604854	0.200893	0.840783	0.988254
ENSG00000010295	IFFO1	27.6333	0.0488145	0.43199	0.112999	0.910031	0.995354
ENSG00000010310	GIPR	9.80506	0.498319	0.751438	0.663153	0.507233	0.965392
ENSG00000010318	PHF7	56.6178	-0.0984187	0.296133	-0.332347	0.739628	0.981271
ENSG00000010319	SEMA3G	13.3181	-0.983765	0.721505	-1.36349	0.172728	0.805158
ENSG00000010322	NISCH	654.275	0.0598826	0.114696	0.522096	0.601603	0.978787
ENSG00000010327	STAB1	2.23488	4.25657	2.4878	1.71098	0.0870852
ENSG00000010361	FUZ	327.195	0.228825	0.140603	1.62745	0.103641	0.689731
ENSG00000010379	SLC6A13	2.22095	1.13758	1.6799	0.677173	0.498296
ENSG00000010404	IDS	10078.6	-0.0699311	0.068476	-1.02125	0.307136	0.908675
ENSG00000010438	PRSS3	72.5916	0.203953	0.313726	0.650098	0.515629	0.965501
ENSG00000010539	ZNF200	328.57	-0.0720597	0.138686	-0.51959	0.60335	0.978787
ENSG00000010610	CD4	0.472575	2.27167	3.24857	0.699283	0.484375
ENSG00000010626	LRRC23	552.686	0.015556	0.113727	0.136784	0.891202	0.993138
ENSG00000010671	BTK	0.619463	1.08312	3.01003	0.359835	0.718971
ENSG00000010704	HFE	1168.36	0.120663	0.123688	0.975538	0.329294	0.917806
ENSG00000010803	SCMH1	438.107	-0.0531171	0.195427	-0.2718	0.785776	0.987257
ENSG00000010810	FYN	98.9307	0.0383662	0.258506	0.148415	0.882015	0.991963
ENSG00000010818	HIVEP2	374.15	0.0764093	0.154745	0.493776	0.621465	0.978787
ENSG00000010932	FMO1	0
ENSG00000011007	ELOA	1693.56	-0.085091	0.0677336	-1.25626	0.209022	0.838394
ENSG00000011009	LYPLA2	1523.35	0.081168	0.0910856	0.891118	0.372866	0.926346
ENSG00000011021	CLCN6	497.196	0.0470333	0.122209	0.384861	0.700341	0.978787
ENSG00000011028	MRC2	2666.7	0.0956135	0.0591073	1.61763	0.105743	0.695988
ENSG00000011052	NME1-NME2	135.694	0.545857	0.276184	1.97643	0.0481066	0.516402
ENSG00000011083	SLC6A7	0
ENSG00000011105	TSPAN9	878.539	-0.232396	0.10779	-2.156	0.0310837	0.425163
ENSG00000011114	BTBD7	291.392	-0.165716	0.174177	-0.951422	0.34139	0.920582
ENSG00000011132	APBA3	239.609	-0.00578692	0.150596	-0.0384269	0.969347	0.998859
ENSG00000011143	MKS1	460.699	-0.237259	0.120884	-1.96271	0.0496805	0.522551
ENSG00000011198	ABHD5	650.983	-0.0373687	0.100123	-0.37323	0.708978	0.979118
ENSG00000011201	ANOS1	3.32571	0.080307	1.27991	0.0627443	0.94997
ENSG00000011243	AKAP8L	1163.63	-0.0663999	0.0833434	-0.796703	0.425624	0.949315
ENSG00000011258	MBTD1	362.865	-0.0122397	0.159046	-0.0769567	0.938658	0.997909
ENSG00000011260	UTP18	2962.23	-0.0388648	0.0584447	-0.664984	0.506061	0.965201
ENSG00000011275	RNF216	2525.1	0.0465167	0.0613486	0.758235	0.44831	0.956485
ENSG00000011295	TTC19	1255.77	0.0984254	0.0802959	1.22578	0.22028	0.843898
ENSG00000011304	PTBP1	11075.7	-0.245065	0.0480623	-5.09891	3.41606e-07	3.98126e-05
ENSG00000011332	DPF1	113.62	-0.189231	0.215835	-0.876741	0.380627	0.931229
ENSG00000011347	SYT7	62.3581	0.261467	0.349762	0.747556	0.454728	0.956485
ENSG00000011376	LARS2	1310.7	0.0523534	0.0746523	0.701297	0.483117	0.959482
ENSG00000011405	PIK3C2A	2559.77	-0.120958	0.126292	-0.957759	0.338184	0.919368
ENSG00000011422	PLAUR	1217.59	0.207629	0.0867757	2.39271	0.0167243	0.312442
ENSG00000011426	ANLN	6506.62	-0.215397	0.0708296	-3.04106	0.00235747	0.0931233
ENSG00000011451	WIZ	1536.03	0.0283567	0.0768094	0.369182	0.711992	0.979118
ENSG00000011454	RABGAP1	1724.31	-0.082618	0.0769321	-1.07391	0.282864	0.89584
ENSG00000011465	DCN	0.177384	0.786103	4.08047	0.19265	0.847233
ENSG00000011478	QPCTL	393.315	0.185	0.134445	1.37603	0.168813	0.805158
ENSG00000011485	PPP5C	3406.82	0.0218073	0.054661	0.398955	0.689926	0.978787
ENSG00000011523	CEP68	852.265	0.041998	0.0897993	0.467687	0.640008	0.978787
ENSG00000011566	MAP4K3	1518.49	-0.000624775	0.0740806	-0.00843371	0.993271	0.99917
ENSG00000011590	ZBTB32	0.325002	-0.170093	4.08047	-0.0416846	0.96675
ENSG00000011600	TYROBP	0
ENSG00000011638	TMEM159	477.377	0.059419	0.11526	0.51552	0.60619	0.978787
ENSG00000011677	GABRA3	16.1559	-0.464644	0.553362	-0.839675	0.401091	0.938162
ENSG00000012048	BRCA1	2826.6	0.024115	0.0969509	0.248735	0.803566	0.988254
ENSG00000012061	ERCC1	2939.94	0.127828	0.0685998	1.86339	0.0624072	0.567481
ENSG00000012124	CD22	85.8318	0.674959	0.269892	2.50085	0.0123894	0.26472
ENSG00000012171	SEMA3B	251.122	0.0662844	0.165582	0.400311	0.688928	0.978787
ENSG00000012174	MBTPS2	2809.85	0.0386854	0.0692537	0.558603	0.576433	0.977163
ENSG00000012211	PRICKLE3	578.095	0.109792	0.142367	0.771184	0.440598	0.956485
ENSG00000012223	LTF	0
ENSG00000012232	EXTL3	2234.46	0.0153097	0.0864563	0.17708	0.859445	0.988254
ENSG00000012504	NR1H4	23.7592	0.6454	0.533423	1.20992	0.226309	0.850505
ENSG00000012660	ELOVL5	5929.24	-0.0412596	0.0525805	-0.784694	0.432633	0.951267
ENSG00000012779	ALOX5	0
ENSG00000012817	KDM5D	674.355	-0.0946266	0.126534	-0.747837	0.454558	0.956485
ENSG00000012822	CALCOCO1	652.204	-0.00621961	0.104909	-0.0592858	0.952724	0.998686
ENSG00000012963	UBR7	1683.86	0.0209113	0.071887	0.290891	0.771135	0.985181
ENSG00000012983	MAP4K5	1624	-0.328467	0.0784054	-4.18933	2.79773e-05	0.00234843
ENSG00000013016	EHD3	1218.9	0.0249008	0.0767076	0.324619	0.745469	0.981271
ENSG00000013275	PSMC4	11462.2	0.0475591	0.0534811	0.88927	0.373858	0.926346
ENSG00000013288	MAN2B2	1284.95	0.0619739	0.0847604	0.731166	0.464678	0.956485
ENSG00000013293	SLC7A14	9.0015	-1.05684	1.32439	-0.797981	0.424882	0.949315
ENSG00000013297	CLDN11	3.90858	-0.36617	1.12362	-0.325885	0.744512
ENSG00000013306	SLC25A39	5586.61	0.0384314	0.066413	0.578672	0.562811	0.975276
ENSG00000013364	MVP	8340.64	0.12566	0.0635378	1.97772	0.0479598	0.516402
ENSG00000013374	NUB1	2277.41	-0.162678	0.0732347	-2.22133	0.0263288	0.391654
ENSG00000013375	PGM3	1180.13	-0.00933785	0.0809514	-0.115351	0.908167	0.995247
ENSG00000013392	RWDD2A	124.864	-0.0177855	0.203825	-0.0872585	0.930466	0.996509
ENSG00000013441	CLK1	608.985	0.0138354	0.104771	0.132054	0.894942	0.99378
ENSG00000013503	POLR3B	482.777	-0.00919065	0.110097	-0.0834774	0.933472	0.996509
ENSG00000013523	ANGEL1	868.929	0.213805	0.0927587	2.30496	0.0211686	0.351824
ENSG00000013561	RNF14	2161.91	-0.0215804	0.0611619	-0.352841	0.724208	0.979435
ENSG00000013563	DNASE1L1	1038.05	0.0289446	0.0901786	0.32097	0.748233	0.982091
ENSG00000013573	DDX11	1757.58	0.071017	0.0746334	0.951544	0.341328	0.920582
ENSG00000013583	HEBP1	1113.95	0.0167066	0.0965653	0.173008	0.862645	0.988303
ENSG00000013588	GPRC5A	25464.3	0.2983	0.0659412	4.52373	6.0759e-06	0.000595017
ENSG00000013619	MAMLD1	332.789	-0.0416734	0.150616	-0.276687	0.78202	0.986372
ENSG00000013725	CD6	4.19003	-1.36492	1.43303	-0.952468	0.340859
ENSG00000013810	TACC3	3514.7	0.0423639	0.0624467	0.678401	0.497518	0.963327
ENSG00000014123	UFL1	669.76	-0.141681	0.102173	-1.38668	0.16554	0.801359
ENSG00000014138	POLA2	1324.85	-0.129423	0.0995232	-1.30043	0.193452	0.8251
ENSG00000014164	ZC3H3	1007.65	0.150743	0.106996	1.40886	0.158875	0.792134
ENSG00000014216	CAPN1	7416.78	0.0910684	0.0500139	1.82086	0.068628	0.588166
ENSG00000014257	ACP3	3.08387	-1.31942	1.42955	-0.922962	0.356027
ENSG00000014641	MDH1	7851.37	0.059781	0.0632901	0.944556	0.344886	0.920918
ENSG00000014824	SLC30A9	1742.41	-0.204878	0.0763223	-2.68438	0.00726653	0.19118
ENSG00000014914	MTMR11	311.146	0.221293	0.135336	1.63514	0.102019	0.686718
ENSG00000014919	COX15	2948.61	0.117813	0.0564845	2.08576	0.0370003	0.464096
ENSG00000015133	CCDC88C	511.467	-0.0239361	0.10597	-0.225877	0.821297	0.988254
ENSG00000015153	YAF2	606.528	-0.0501929	0.118011	-0.425325	0.6706	0.978787
ENSG00000015171	ZMYND11	3328.57	-0.101939	0.0645946	-1.57813	0.114536	0.716584
ENSG00000015285	WAS	13.1029	-0.415883	0.678072	-0.613332	0.539657	0.97227
ENSG00000015413	DPEP1	27.2568	-0.568318	0.48938	-1.1613	0.245519	0.865793
ENSG00000015475	BID	1481.25	0.0431868	0.0954456	0.452476	0.650926	0.978787
ENSG00000015479	MATR3	10489.9	-0.109635	0.0556755	-1.96919	0.0489318	0.519606
ENSG00000015520	NPC1L1	2.34138	-0.479284	1.37719	-0.348015	0.727829
ENSG00000015532	XYLT2	1713.42	0.159347	0.0762876	2.08877	0.0367281	0.46286
ENSG00000015568	RGPD5	106.606	-2.41453	0.727188	-3.32037	0.000898978	0.0459326
ENSG00000015592	STMN4	0
ENSG00000015676	NUDCD3	2640.04	0.0735929	0.0797173	0.923173	0.355917	0.922948
ENSG00000016082	ISL1	1.85623	-0.447238	1.68327	-0.265695	0.790474
ENSG00000016391	CHDH	392.254	-0.24476	0.167581	-1.46055	0.144139	0.769623
ENSG00000016402	IL20RA	2.11968	0.991563	1.47594	0.671817	0.5017
ENSG00000016490	CLCA1	0
ENSG00000016602	CLCA4	0.328482	-1.93915	4.04658	-0.479208	0.631791
ENSG00000016864	GLT8D1	796.293	-0.0669825	0.100766	-0.664732	0.506222	0.965201
ENSG00000017260	ATP2C1	3148.55	-0.0289193	0.0668573	-0.432553	0.66534	0.978787
ENSG00000017427	IGF1	3.9036	0.398811	1.23472	0.322997	0.746698
ENSG00000017483	SLC38A5	1.76767	-0.562132	1.74085	-0.322906	0.746766
ENSG00000017797	RALBP1	2663.26	-0.03248	0.0620993	-0.523034	0.600951	0.978787
ENSG00000018189	RUFY3	209.435	0.19653	0.158258	1.24183	0.214298	0.841557
ENSG00000018236	CNTN1	9669.01	-0.135562	0.0796728	-1.70149	0.0888519	0.650009
ENSG00000018280	SLC11A1	20.0307	0.38871	0.593111	0.655374	0.512227	0.965392
ENSG00000018408	WWTR1	5759.57	0.0275383	0.0503693	0.546728	0.584566	0.977163
ENSG00000018510	AGPS	3280.02	-0.230739	0.0672883	-3.42911	0.000605557	0.0333576
ENSG00000018607	ZNF806	0
ENSG00000018610	CXorf56	1082.4	-0.0279742	0.0795133	-0.351818	0.724975	0.979435
ENSG00000018625	ATP1A2	5.75028	-0.643837	1.0488	-0.613882	0.539294
ENSG00000018699	TTC27	1392.5	-0.0407371	0.0713784	-0.57072	0.568189	0.975739
ENSG00000018869	ZNF582	51.1973	-0.390237	0.347182	-1.12401	0.261008	0.878526
ENSG00000019102	VSIG2	0
ENSG00000019144	PHLDB1	475.332	-0.00665392	0.135714	-0.0490289	0.960896	0.998849
ENSG00000019169	MARCO	0.765831	2.02932	2.81656	0.720498	0.471218
ENSG00000019186	CYP24A1	18158	0.084517	0.0508227	1.66298	0.0963168	0.67374
ENSG00000019485	PRDM11	457.714	0.064678	0.153382	0.421679	0.673259	0.978787
ENSG00000019505	SYT13	1001.19	0.0529203	0.0914346	0.578777	0.562739	0.975276
ENSG00000019549	SNAI2	23.2979	-0.274402	0.494995	-0.554354	0.579337	0.977163
ENSG00000019582	CD74	0.524459	-0.0803215	3.66478	-0.0219171	0.982514
ENSG00000019991	HGF	3.20903	-0.950673	1.31741	-0.721622	0.470527
ENSG00000019995	ZRANB1	1131.44	-0.019404	0.0797934	-0.243178	0.807868	0.988254
ENSG00000020129	NCDN	1092.99	-0.0170624	0.0804726	-0.212027	0.832086	0.988254
ENSG00000020181	ADGRA2	143.646	-0.0605986	0.200072	-0.302884	0.761978	0.984508
ENSG00000020219	CCT8L1P	0.141037	0.786103	4.08047	0.19265	0.847233
ENSG00000020256	ZFP64	976.839	0.0162799	0.0808539	0.201349	0.840426	0.988254
ENSG00000020426	MNAT1	804.814	-0.0853134	0.0930159	-0.917191	0.359042	0.923092
ENSG00000020577	SAMD4A	487.9	-0.0420395	0.176551	-0.238115	0.811792	0.988254
ENSG00000020633	RUNX3	372.492	-0.14838	0.171447	-0.86546	0.386786	0.932233
ENSG00000020922	MRE11	984.117	-0.12749	0.120271	-1.06003	0.289132	0.897287
ENSG00000021300	PLEKHB1	38.1286	-0.586367	0.395707	-1.48182	0.138388	0.761877
ENSG00000021355	SERPINB1	2184.8	0.0897257	0.0684389	1.31103	0.189846	0.822905
ENSG00000021461	CYP3A43	0.154163	0.786103	4.08047	0.19265	0.847233
ENSG00000021488	SLC7A9	3.71132	-0.177938	1.14253	-0.15574	0.876238
ENSG00000021574	SPAST	1444.5	-0.0320059	0.0982724	-0.325686	0.744662	0.981271
ENSG00000021645	NRXN3	18.3903	0.180392	0.63418	0.284449	0.776066	0.986372
ENSG00000021762	OSBPL5	330.72	0.2236	0.157608	1.41871	0.155984	0.78842
ENSG00000021776	AQR	3728.37	0.0133282	0.0650534	0.20488	0.837666	0.988254
ENSG00000021826	CPS1	1025.49	0.232686	0.0838117	2.77629	0.00549826	0.161409
ENSG00000021852	C8B	0
ENSG00000022267	FHL1	1370.25	0.0258099	0.0936307	0.275657	0.782812	0.986372
ENSG00000022277	RTF2	3088.86	-0.0308733	0.0626591	-0.492718	0.622212	0.978787
ENSG00000022355	GABRA1	0
ENSG00000022556	NLRP2	2864.31	0.0411546	0.0712055	0.577969	0.563285	0.975276
ENSG00000022567	SLC45A4	1112.86	0.0188222	0.122057	0.154209	0.877445	0.991478
ENSG00000022840	RNF10	5580.83	0.013494	0.0591018	0.228318	0.819399	0.988254
ENSG00000022976	ZNF839	293.947	0.188402	0.136326	1.382	0.166973	0.801359
ENSG00000023041	ZDHHC6	1493.15	0.0160383	0.0817498	0.196188	0.844463	0.988254
ENSG00000023171	GRAMD1B	4053.2	0.130454	0.0856748	1.52266	0.127843	0.743453
ENSG00000023191	RNH1	6321.58	0.0275679	0.0703861	0.391666	0.695305	0.978787
ENSG00000023228	NDUFS1	3947.05	0.0484905	0.0526447	0.92109	0.357003	0.923092
ENSG00000023287	RB1CC1	2342.18	-0.169775	0.0808531	-2.09979	0.0357469	0.458692
ENSG00000023318	ERP44	1770.16	-0.000818816	0.0733669	-0.0111606	0.991095	0.99917
ENSG00000023330	ALAS1	3086.72	0.0717508	0.0656435	1.09304	0.274377	0.89097
ENSG00000023445	BIRC3	2528.78	-0.212494	0.061669	-3.44572	0.000569551	0.0320919
ENSG00000023516	AKAP11	1857.14	0.0219428	0.105793	0.207412	0.835688	0.988254
ENSG00000023572	GLRX2	1145.48	-0.0856161	0.0934322	-0.916346	0.359486	0.923092
ENSG00000023608	SNAPC1	804.931	-0.166521	0.0941694	-1.76831	0.0770085	0.615825
ENSG00000023697	DERA	1432.39	0.00139441	0.0684868	0.0203602	0.983756	0.99917
ENSG00000023734	STRAP	9895.36	-0.118292	0.0462375	-2.55836	0.0105166	0.241148
ENSG00000023839	ABCC2	15755.5	0.142388	0.0568747	2.50354	0.0122957	0.263867
ENSG00000023892	DEF6	1.86293	0.154492	1.57126	0.0983236	0.921675
ENSG00000023902	PLEKHO1	154.257	0.365618	0.194149	1.88319	0.0596751	0.558819
ENSG00000023909	GCLM	7264.98	0.0921558	0.0586092	1.57238	0.115863	0.720216
ENSG00000024048	UBR2	928.92	0.0129126	0.103437	0.124835	0.900654	0.99407
ENSG00000024422	EHD2	7613.78	-0.186317	0.0658691	-2.82859	0.00467539	0.146413
ENSG00000024526	DEPDC1	1490.09	-0.243047	0.111804	-2.17388	0.0297144	0.416511
ENSG00000024862	CCDC28A	325.73	0.0160469	0.129857	0.123574	0.901652	0.994107
ENSG00000025039	RRAGD	557.57	-0.123282	0.126727	-0.972814	0.330646	0.917806
ENSG00000025156	HSF2	393.273	0.0729347	0.123652	0.589837	0.5553	0.973452
ENSG00000025293	PHF20	1712.99	-0.0377962	0.0697099	-0.542194	0.587685	0.977397
ENSG00000025423	HSD17B6	23.6631	-0.283566	0.536309	-0.528736	0.596989	0.978787
ENSG00000025434	NR1H3	312.649	0.31815	0.154825	2.0549	0.0398891	0.478559
ENSG00000025708	TYMP	279.721	1.98623	0.151485	13.1117	2.82033e-39	9.03916e-37
ENSG00000025770	NCAPH2	1090.88	0.174434	0.0857574	2.03404	0.0419477	0.48605
ENSG00000025772	TOMM34	1600.15	-0.00440756	0.0818397	-0.053856	0.95705	0.998849
ENSG00000025796	SEC63	2437.73	-0.0576378	0.0768563	-0.749942	0.45329	0.956485
ENSG00000025800	KPNA6	2882.86	0.0340135	0.0665843	0.510834	0.609467	0.978787
ENSG00000026025	VIM	36661	-0.111658	0.0662562	-1.68525	0.091941	0.66119
ENSG00000026036	RTEL1-TNFRSF6B	49.3576	-0.215602	0.436769	-0.493628	0.621569	0.978787
ENSG00000026103	FAS	896.329	-0.0585369	0.103145	-0.567521	0.57036	0.976667
ENSG00000026297	RNASET2	348.74	-0.00100287	0.125506	-0.00799066	0.993624	0.99917
ENSG00000026508	CD44	22104.3	-0.116857	0.07158	-1.63253	0.102567	0.687936
ENSG00000026559	KCNG1	201.353	0.146349	0.182161	0.803406	0.42174	0.948263
ENSG00000026652	AGPAT4	164.516	-0.344562	0.20212	-1.70474	0.0882438	0.649667
ENSG00000026751	SLAMF7	51.942	-0.141477	0.320296	-0.441708	0.6587	0.978787
ENSG00000026950	BTN3A1	418.788	0.405731	0.121573	3.33734	0.000845829	0.0438525
ENSG00000027001	MIPEP	761.571	0.00961988	0.103197	0.0932188	0.92573	0.996509
ENSG00000027075	PRKCH	478.366	0.0840708	0.136835	0.614396	0.538954	0.971683
ENSG00000027644	INSRR	0
ENSG00000027697	IFNGR1	1073.07	-0.10257	0.0823565	-1.24544	0.212972	0.840272
ENSG00000027847	B4GALT7	744.038	0.0785491	0.093089	0.843806	0.398778	0.936408
ENSG00000027869	SH2D2A	42.3971	0.223675	0.442899	0.505026	0.61354	0.978787
ENSG00000028116	VRK2	779.29	0.0375584	0.090178	0.416492	0.67705	0.978787
ENSG00000028137	TNFRSF1B	18.8342	1.12015	0.618111	1.81221	0.0699531	0.591587
ENSG00000028203	VEZT	3709.8	-0.0187527	0.0601883	-0.311566	0.75537	0.983766
ENSG00000028277	POU2F2	13.8548	0.0601053	0.742286	0.0809733	0.935463	0.99698
ENSG00000028310	BRD9	538.925	-0.0461092	0.10661	-0.432505	0.665374	0.978787
ENSG00000028528	SNX1	3146.87	0.0364016	0.0830149	0.438494	0.661028	0.978787
ENSG00000028839	TBPL1	607.384	0.175983	0.0983969	1.7885	0.0736955	0.607395
ENSG00000029153	ARNTL2	1858.37	-0.0931968	0.0894935	-1.04138	0.297699	0.903021
ENSG00000029363	BCLAF1	5617.45	-0.0949836	0.0737811	-1.28737	0.197965	0.827553
ENSG00000029364	SLC39A9	3840.05	0.0518164	0.0577982	0.896505	0.369983	0.926336
ENSG00000029534	ANK1	550.411	-0.0492006	0.12116	-0.406081	0.684683	0.978787
ENSG00000029559	IBSP	0
ENSG00000029639	TFB1M	270.291	0.0266743	0.202883	0.131476	0.895398	0.99378
ENSG00000029725	RABEP1	3384.17	-0.245056	0.0757235	-3.2362	0.00121134	0.058453
ENSG00000029993	HMGB3	4597.78	-0.0595244	0.0576037	-1.03334	0.301442	0.90593
ENSG00000030066	NUP160	3123.5	-0.0696374	0.0745335	-0.93431	0.350144	0.921052
ENSG00000030110	BAK1	867.198	0.0641403	0.0876648	0.731653	0.46438	0.956485
ENSG00000030304	MUSK	0.141037	0.786103	4.08047	0.19265	0.847233
ENSG00000030419	IKZF2	33.604	-0.216898	0.446713	-0.485542	0.627292	0.978787
ENSG00000030582	GRN	9677.4	0.239557	0.075939	3.1546	0.00160717	0.070386
ENSG00000031003	FAM13B	964.101	-0.0877417	0.109436	-0.801762	0.422691	0.948263
ENSG00000031081	ARHGAP31	78.2966	0.0833444	0.416571	0.200072	0.841424	0.988254
ENSG00000031691	CENPQ	373.779	0.0439765	0.120812	0.364008	0.715852	0.979118
ENSG00000031698	SARS1	3743.12	0.0101258	0.0575553	0.175931	0.860348	0.988254
ENSG00000031823	RANBP3	1676.76	0.0481035	0.087076	0.552431	0.580653	0.977163
ENSG00000032219	ARID4A	494.81	-0.0177653	0.131939	-0.134648	0.89289	0.993197
ENSG00000032389	EIPR1	1587.02	-0.0148469	0.0823597	-0.180269	0.856941	0.988254
ENSG00000032444	PNPLA6	2391.04	0.0463203	0.0612938	0.755709	0.449824	0.956485
ENSG00000032742	IFT88	530.001	-0.128486	0.104703	-1.22715	0.219767	0.843502
ENSG00000033011	ALG1	1809.71	-0.072275	0.0725615	-0.996051	0.319225	0.915071
ENSG00000033030	ZCCHC8	1098.93	0.027483	0.0773001	0.355536	0.722188	0.979433
ENSG00000033050	ABCF2	3747.83	-0.0374347	0.0789049	-0.474429	0.635194	0.978787
ENSG00000033100	CHPF2	1733.56	-0.00888057	0.0644582	-0.137773	0.89042	0.993138
ENSG00000033122	LRRC7	8.19019	0.000118655	0.76449	0.000155208	0.999876	0.999914
ENSG00000033170	FUT8	1072.45	-0.00125646	0.0948622	-0.0132451	0.989432	0.99917
ENSG00000033178	UBA6	1664.94	-0.0645573	0.14468	-0.446206	0.655448	0.978787
ENSG00000033327	GAB2	412.775	-0.195367	0.117901	-1.65705	0.0975099	0.675629
ENSG00000033627	ATP6V0A1	2521.52	0.168286	0.0805458	2.08932	0.0366789	0.46286
ENSG00000033800	PIAS1	1724.44	-0.0304396	0.105179	-0.289409	0.772269	0.985719
ENSG00000033867	SLC4A7	2595.67	-0.385349	0.0892282	-4.31869	1.56957e-05	0.00143728
ENSG00000034053	APBA2	288.563	0.0367313	0.155505	0.236207	0.813272	0.988254
ENSG00000034152	MAP2K3	2789.72	-0.0822111	0.0627186	-1.31079	0.189927	0.822905
ENSG00000034239	EFCAB1	0.308327	1.66121	4.04005	0.411186	0.680936
ENSG00000034510	TMSB10	52768.1	0.0961589	0.0726256	1.32404	0.185491	0.817758
ENSG00000034533	ASTE1	186.41	0.105374	0.182136	0.578542	0.562898	0.975276
ENSG00000034677	RNF19A	1423.43	-0.0603861	0.101514	-0.594856	0.551939	0.973452
ENSG00000034693	PEX3	323.482	-0.0252006	0.129235	-0.194998	0.845395	0.988254
ENSG00000034713	GABARAPL2	1727.31	-0.103102	0.0698578	-1.47588	0.139976	0.762608
ENSG00000034971	MYOC	0
ENSG00000035115	SH3YL1	178.039	-0.0301391	0.180193	-0.16726	0.867166	0.989863
ENSG00000035141	FAM136A	4128.62	-0.0979248	0.0565216	-1.73252	0.083181	0.635094
ENSG00000035403	VCL	10865.5	-0.0949084	0.0555572	-1.7083	0.0875808	0.648116
ENSG00000035499	DEPDC1B	899.103	-0.0578737	0.0851826	-0.679407	0.49688	0.963293
ENSG00000035664	DAPK2	131.78	0.202335	0.228496	0.885508	0.375883	0.927344
ENSG00000035681	NSMAF	1914.72	-0.0386584	0.0627471	-0.616098	0.53783	0.971497
ENSG00000035687	ADSS2	2684.23	0.06533	0.0600653	1.08765	0.276749	0.893863
ENSG00000035720	STAP1	0
ENSG00000035862	TIMP2	12949.5	0.106954	0.0512667	2.08622	0.0369585	0.464096
ENSG00000035928	RFC1	1858.51	0.0300115	0.0842454	0.356239	0.721662	0.979308
ENSG00000036054	TBC1D23	951.156	-0.00982103	0.0893108	-0.109965	0.912437	0.995836
ENSG00000036257	CUL3	3514.8	-0.052991	0.0609321	-0.869674	0.384479	0.932233
ENSG00000036448	MYOM2	27.7994	0.616918	0.563675	1.09446	0.273755	0.890541
ENSG00000036473	OTC	0
ENSG00000036530	CYP46A1	6.44908	-0.371658	0.999145	-0.371976	0.709911
ENSG00000036549	AC118549.1	1064.01	0.0477946	0.0817462	0.584671	0.558769	0.973952
ENSG00000036565	SLC18A1	1.60785	-2.02909	2.04075	-0.994289	0.320082
ENSG00000036672	USP2	31.2974	0.802085	0.519783	1.54311	0.122803	0.732841
ENSG00000036828	CASR	30.1293	-0.0764429	0.414743	-0.184314	0.853767	0.988254
ENSG00000037042	TUBG2	321.844	0.0704489	0.131685	0.534982	0.592663	0.978787
ENSG00000037241	RPL26L1	1364.96	0.0433181	0.0851931	0.50847	0.611124	0.978787
ENSG00000037280	FLT4	195.715	-0.252356	0.189389	-1.33247	0.182705	0.814747
ENSG00000037474	NSUN2	4539.5	-0.0679647	0.0502957	-1.3513	0.176598	0.809242
ENSG00000037637	FBXO42	557.985	-0.010214	0.12352	-0.0826908	0.934097	0.996509
ENSG00000037749	MFAP3	778.961	-0.167721	0.108932	-1.53969	0.123636	0.734203
ENSG00000037757	MRI1	599.041	0.0243509	0.0976201	0.249445	0.803016	0.988254
ENSG00000037897	METTL1	895.214	-0.0630869	0.0855557	-0.737377	0.460893	0.956485
ENSG00000037965	HOXC8	143.617	-0.0902697	0.193868	-0.465626	0.641484	0.978787
ENSG00000038002	AGA	620.562	0.05833	0.129816	0.449327	0.653196	0.978787
ENSG00000038210	PI4K2B	517.482	0.0569956	0.127491	0.447057	0.654834	0.978787
ENSG00000038219	BOD1L1	1898.78	0.0760565	0.0730134	1.04168	0.297561	0.903021
ENSG00000038274	MAT2B	2236.21	0.0988336	0.0698659	1.41462	0.15718	0.79127
ENSG00000038295	TLL1	9.21942	-0.188083	0.823172	-0.228485	0.819269	0.988254
ENSG00000038358	EDC4	2202.28	0.0280013	0.0877018	0.319278	0.749516	0.982555
ENSG00000038382	TRIO	4203.66	-0.0295568	0.0606257	-0.487529	0.625884	0.978787
ENSG00000038427	VCAN	924.643	0.153556	0.129127	1.18918	0.234368	0.856499
ENSG00000038532	CLEC16A	992.362	0.0891637	0.0985811	0.904471	0.365746	0.925629
ENSG00000038945	MSR1	0.177384	0.786103	4.08047	0.19265	0.847233
ENSG00000039068	CDH1	875.687	0.0866591	0.0916302	0.945748	0.344277	0.920918
ENSG00000039123	MTREX	3222.42	-0.0980436	0.0757748	-1.29388	0.195707	0.826502
ENSG00000039139	DNAH5	76.9214	-0.0473018	0.320443	-0.147614	0.882647	0.992053
ENSG00000039319	ZFYVE16	1856.7	-0.0511292	0.0857141	-0.596508	0.550836	0.973431
ENSG00000039523	RIPOR1	1588.11	0.0663655	0.0758554	0.874896	0.381631	0.932044
ENSG00000039537	C6	0.154163	0.786103	4.08047	0.19265	0.847233
ENSG00000039560	RAI14	4753.33	-0.139102	0.063333	-2.19636	0.0280662	0.404992
ENSG00000039600	SOX30	0.693912	1.39936	2.92112	0.479049	0.631904
ENSG00000039650	PNKP	591.437	0.227409	0.125726	1.80876	0.0704876	0.592522
ENSG00000039987	BEST2	0.338871	-0.20419	4.08047	-0.0500409	0.96009
ENSG00000040199	PHLPP2	955.769	-0.0242681	0.102571	-0.236597	0.812969	0.988254
ENSG00000040275	SPDL1	2007.58	-0.222259	0.0986166	-2.25377	0.0242106	0.374362
ENSG00000040341	STAU2	1622.09	-0.0876937	0.0912277	-0.961262	0.336421	0.919368
ENSG00000040487	SLC66A1	586.747	0.0377257	0.105986	0.355952	0.721877	0.979308
ENSG00000040531	CTNS	973.563	-0.0951032	0.0957171	-0.993586	0.320424	0.915071
ENSG00000040608	RTN4R	233.908	-0.140033	0.184733	-0.758028	0.448434	0.956485
ENSG00000040633	PHF23	2452.92	-0.0571429	0.060668	-0.941896	0.346246	0.920918
ENSG00000040731	CDH10	18.6428	0.0164623	0.543716	0.0302774	0.975846	0.99917
ENSG00000040933	INPP4A	994.093	0.0525545	0.104415	0.503322	0.614738	0.978787
ENSG00000041353	RAB27B	3837.53	-0.13285	0.0749557	-1.77238	0.0763313	0.613697
ENSG00000041357	PSMA4	8415.6	-0.00640947	0.058865	-0.108884	0.913294	0.995994
ENSG00000041515	MYO16	4.76826	-0.0589575	1.09025	-0.0540773	0.956874
ENSG00000041802	LSG1	1723.83	-0.0071123	0.0728979	-0.0975653	0.922278	0.996317
ENSG00000041880	PARP3	273.104	0.230799	0.194336	1.18763	0.23498	0.857619
ENSG00000041982	TNC	89.2295	-0.145216	0.284897	-0.509715	0.610251	0.978787
ENSG00000041988	THAP3	331.567	-0.0244429	0.134199	-0.18214	0.855473	0.988254
ENSG00000042062	RIPOR3	9.17874	-1.29679	0.829971	-1.56246	0.118181	0.725547
ENSG00000042088	TDP1	616.97	-0.0655395	0.113936	-0.575233	0.565134	0.975457
ENSG00000042286	AIFM2	2354.09	0.0889456	0.0670685	1.32619	0.184777	0.817758
ENSG00000042304	C2orf83	0.829416	0.310507	2.74694	0.113037	0.910001
ENSG00000042317	SPATA7	163.084	0.247937	0.186043	1.33269	0.182634	0.814747
ENSG00000042429	MED17	863.743	0.0206588	0.0892718	0.231414	0.816993	0.988254
ENSG00000042445	RETSAT	2195.29	0.0281246	0.0778457	0.361286	0.717886	0.979118
ENSG00000042493	CAPG	1234.14	0.104914	0.0868341	1.20821	0.226968	0.850666
ENSG00000042753	AP2S1	4163.42	0.0547121	0.0742866	0.736499	0.461427	0.956485
ENSG00000042781	USH2A	0
ENSG00000042813	ZPBP	0
ENSG00000042832	TG	10.2686	-1.74161	1.08905	-1.59919	0.109778	0.708385
ENSG00000042980	ADAM28	13.6359	0.731783	0.815125	0.897757	0.369315	0.925951
ENSG00000043039	BARX2	2.16721	1.02685	1.51658	0.677077	0.498357
ENSG00000043093	DCUN1D1	1393.36	0.0204072	0.111595	0.182868	0.854902	0.988254
ENSG00000043143	JADE2	3487.48	-0.0287515	0.0780648	-0.368303	0.712647	0.979118
ENSG00000043355	ZIC2	297.633	-0.0481324	0.134577	-0.357657	0.7206	0.979118
ENSG00000043462	LCP2	0.164241	-1.13745	4.08047	-0.278754	0.780433
ENSG00000043514	TRIT1	513.254	-0.0691337	0.106497	-0.649162	0.516233	0.965501
ENSG00000043591	ADRB1	50.4147	0.26889	0.31736	0.847272	0.396844	0.936077
ENSG00000044012	GUCA2B	3.27489	0.159537	1.32738	0.12019	0.904333
ENSG00000044090	CUL7	797.945	-0.0225588	0.087077	-0.259067	0.795583	0.988225
ENSG00000044115	CTNNA1	12703.7	-0.0200113	0.051272	-0.390296	0.696317	0.978787
ENSG00000044446	PHKA2	586.737	0.121318	0.108292	1.12029	0.262592	0.879369
ENSG00000044459	CNTLN	601.494	-0.0988727	0.108223	-0.913604	0.360925	0.924403
ENSG00000044524	EPHA3	0
ENSG00000044574	HSPA5	25974.7	0.135275	0.0468426	2.88786	0.00387874	0.12931
ENSG00000046604	DSG2	5612.26	-0.0685848	0.066942	-1.02454	0.305579	0.908675
ENSG00000046647	GEMIN8	239.626	-0.0591112	0.159082	-0.371578	0.710207	0.979118
ENSG00000046651	OFD1	485.741	-0.12991	0.138751	-0.936283	0.349127	0.921052
ENSG00000046653	GPM6B	0.717915	-0.444846	3.33058	-0.133564	0.893747
ENSG00000046774	MAGEC2	1.547	0.248721	2.01023	0.123728	0.901531
ENSG00000046889	PREX2	0.331418	1.75124	4.03209	0.434326	0.664051
ENSG00000047056	WDR37	452.238	-0.0727706	0.137178	-0.530485	0.595776	0.978787
ENSG00000047188	YTHDC2	1576.29	-0.0141172	0.0741827	-0.190303	0.849072	0.988254
ENSG00000047230	CTPS2	1013.25	-0.0338219	0.0872437	-0.387671	0.69826	0.978787
ENSG00000047249	ATP6V1H	1656.29	0.0204166	0.0754394	0.270636	0.786671	0.987257
ENSG00000047315	POLR2B	5065.39	-0.0982591	0.0567889	-1.73025	0.0835852	0.635428
ENSG00000047346	FAM214A	547.899	-0.146599	0.1588	-0.923165	0.355921	0.922948
ENSG00000047365	ARAP2	78.4214	-0.00802882	0.290378	-0.0276495	0.977942	0.99917
ENSG00000047410	TPR	4934.88	0.0938947	0.065777	1.42747	0.153445	0.784866
ENSG00000047457	CP	358.903	0.330365	0.146387	2.2568	0.0240208	0.373062
ENSG00000047578	KIAA0556	776.705	0.217084	0.110319	1.96778	0.0490929	0.520142
ENSG00000047579	DTNBP1	301.75	0.0663246	0.140523	0.471984	0.636938	0.978787
ENSG00000047597	XK	138.331	-0.212798	0.192565	-1.10507	0.269128	0.885741
ENSG00000047617	ANO2	0
ENSG00000047621	C12orf4	867.617	-0.071096	0.0893193	-0.795976	0.426046	0.949315
ENSG00000047634	SCML1	340.837	0.0916642	0.132235	0.693191	0.48819	0.960235
ENSG00000047644	WWC3	1949.59	0.0961049	0.0763287	1.25909	0.207997	0.838394
ENSG00000047648	ARHGAP6	0.141037	0.786103	4.08047	0.19265	0.847233
ENSG00000047662	FAM184B	0.347892	-2.01035	4.03995	-0.497618	0.618753
ENSG00000047849	MAP4	10029.2	0.0139094	0.0460263	0.302206	0.762495	0.984739
ENSG00000047932	GOPC	1633.63	-0.0767722	0.0752062	-1.02082	0.307339	0.908675
ENSG00000047936	ROS1	6.58933	-0.241946	0.894777	-0.270399	0.786854
ENSG00000048028	USP28	1205.43	-0.0130877	0.0895077	-0.146219	0.883749	0.992089
ENSG00000048052	HDAC9	33.5889	0.120656	0.408696	0.295223	0.767823	0.985181
ENSG00000048140	TSPAN17	2491.92	0.126299	0.0738178	1.71096	0.0870891	0.646953
ENSG00000048162	NOP16	2116.5	-0.0887108	0.0681707	-1.3013	0.193155	0.8251
ENSG00000048342	CC2D2A	846.567	0.0643424	0.0942787	0.68247	0.494942	0.962846
ENSG00000048392	RRM2B	2281.17	-0.121595	0.0780309	-1.55829	0.119165	0.727789
ENSG00000048405	ZNF800	499.374	-0.199155	0.132163	-1.50689	0.13184	0.752666
ENSG00000048462	TNFRSF17	0.183683	-1.13745	4.08047	-0.278754	0.780433
ENSG00000048471	SNX29	371.804	-0.218419	0.123554	-1.76781	0.0770932	0.615825
ENSG00000048540	LMO3	0
ENSG00000048544	MRPS10	1532.21	-0.0859098	0.0703579	-1.22104	0.222071	0.845083
ENSG00000048545	GUCA1A	0
ENSG00000048649	RSF1	1256.17	-0.166286	0.0985696	-1.68699	0.0916044	0.660894
ENSG00000048707	VPS13D	1039.73	0.0127175	0.113716	0.111836	0.910954	0.995354
ENSG00000048740	CELF2	3.7416	-0.377336	1.15707	-0.326113	0.744339
ENSG00000048828	FAM120A	8584.94	-0.0990508	0.0715299	-1.38475	0.16613	0.801359
ENSG00000048991	R3HDM1	1815.65	0.125324	0.0947177	1.32313	0.185793	0.817758
ENSG00000049089	COL9A2	2.36235	1.12176	1.5881	0.706352	0.479969
ENSG00000049130	KITLG	1208.87	-0.0474851	0.0860918	-0.551563	0.581248	0.977163
ENSG00000049167	ERCC8	491.545	-0.113232	0.113994	-0.993309	0.32056	0.915071
ENSG00000049192	ADAMTS6	9.33905	-0.360043	0.928793	-0.387646	0.698278	0.978787
ENSG00000049239	H6PD	936.146	0.0754777	0.0983252	0.767633	0.442705	0.956485
ENSG00000049245	VAMP3	2580	0.00574495	0.0603211	0.0952395	0.924125	0.996453
ENSG00000049246	PER3	159.31	0.00532261	0.231797	0.0229624	0.98168	0.99917
ENSG00000049247	UTS2	0
ENSG00000049249	TNFRSF9	98.9182	-0.258323	0.26078	-0.990579	0.321891	0.915071
ENSG00000049283	EPN3	5.6469	-0.358646	1.00109	-0.358256	0.720152
ENSG00000049323	LTBP1	1356.84	-0.0747066	0.0942525	-0.792623	0.427998	0.950642
ENSG00000049449	RCN1	10708	0.00766181	0.0525836	0.145707	0.884153	0.992118
ENSG00000049540	ELN	22.1713	-0.169659	0.608854	-0.278653	0.780511	0.986372
ENSG00000049541	RFC2	1940.58	-0.115119	0.0688723	-1.67149	0.0946257	0.668421
ENSG00000049618	ARID1B	1600.21	-0.00928908	0.124644	-0.074525	0.940593	0.998137
ENSG00000049656	CLPTM1L	5093.52	0.220421	0.0705463	3.12448	0.00178118	0.0763472
ENSG00000049759	NEDD4L	1706.65	0.044168	0.079547	0.555244	0.578728	0.977163
ENSG00000049768	FOXP3	6.83348	0.803164	0.846214	0.949127	0.342556
ENSG00000049769	PPP1R3F	221.654	-0.0744839	0.190366	-0.391266	0.695601	0.978787
ENSG00000049860	HEXB	4815.03	0.120748	0.0549631	2.19689	0.0280281	0.404992
ENSG00000049883	PTCD2	693.055	0.0200298	0.0993865	0.201535	0.840281	0.988254
ENSG00000050030	NEXMIF	2.68017	0.178146	1.4216	0.125313	0.900276
ENSG00000050130	JKAMP	2916.36	0.0220963	0.0642681	0.343814	0.730986	0.980386
ENSG00000050165	DKK3	700.922	0.319257	0.10243	3.11683	0.00182807	0.0778835
ENSG00000050327	ARHGEF5	100.66	0.188376	0.22088	0.852842	0.393747	0.935684
ENSG00000050344	NFE2L3	616.19	0.195172	0.106697	1.82921	0.0673678	0.586071
ENSG00000050393	MCUR1	1169.07	-0.150058	0.104753	-1.43249	0.152003	0.782213
ENSG00000050405	LIMA1	409.412	-0.05818	0.124903	-0.465801	0.641358	0.978787
ENSG00000050426	LETMD1	558.761	0.26633	0.127705	2.0855	0.0370237	0.464096
ENSG00000050438	SLC4A8	181.709	0.00404119	0.281327	0.0143647	0.988539	0.99917
ENSG00000050555	LAMC3	127.831	0.831483	0.263081	3.16056	0.00157466	0.0693935
ENSG00000050628	PTGER3	0
ENSG00000050730	TNIP3	13.2233	0.55413	0.622457	0.89023	0.373342	0.926346
ENSG00000050748	MAPK9	1636.94	-0.115314	0.0738316	-1.56186	0.118322	0.725547
ENSG00000050767	COL23A1	0
ENSG00000050820	BCAR1	2324.74	-0.218184	0.0930263	-2.3454	0.0190065	0.335457
ENSG00000051009	FAM160A2	790.879	0.128523	0.129152	0.995131	0.319673	0.915071
ENSG00000051108	HERPUD1	2054.86	0.193069	0.103715	1.86153	0.0626687	0.569063
ENSG00000051128	HOMER3	693.49	-0.128193	0.108482	-1.1817	0.237324	0.859376
ENSG00000051180	RAD51	626.801	0.0224239	0.102873	0.217976	0.827448	0.988254
ENSG00000051341	POLQ	1225.4	-0.0112051	0.0905705	-0.123716	0.90154	0.994107
ENSG00000051382	PIK3CB	1495.75	-0.0727523	0.0898933	-0.809319	0.418332	0.946928
ENSG00000051523	CYBA	2970.08	0.0111315	0.0914706	0.121695	0.903141	0.994385
ENSG00000051596	THOC3	1377.85	-0.161912	0.103555	-1.56354	0.117926	0.725249
ENSG00000051620	HEBP2	834.025	-0.107283	0.0890441	-1.20483	0.228268	0.851488
ENSG00000051825	MPHOSPH9	1190.2	-0.0188649	0.0907017	-0.207989	0.835238	0.988254
ENSG00000052126	PLEKHA5	602.153	-0.108651	0.104915	-1.03561	0.300386	0.904944
ENSG00000052344	PRSS8	0.971771	-1.23472	2.40514	-0.513368	0.607694
ENSG00000052723	SIKE1	506.744	-0.0462991	0.207099	-0.22356	0.8231	0.988254
ENSG00000052749	RRP12	3187.1	0.092517	0.0596497	1.55101	0.1209	0.730934
ENSG00000052795	FNIP2	411.76	-0.174463	0.1426	-1.22344	0.221163	0.844784
ENSG00000052802	MSMO1	3420.8	0.183234	0.0605644	3.02544	0.00248271	0.0963765
ENSG00000052841	TTC17	2298.22	0.113199	0.0661573	1.71106	0.0870709	0.646953
ENSG00000052850	ALX4	142.134	0.0264859	0.20944	0.126461	0.899367	0.99407
ENSG00000053108	FSTL4	162.584	-0.173945	0.204888	-0.848978	0.395893	0.935684
ENSG00000053254	FOXN3	701.891	-0.0961672	0.136782	-0.703067	0.482014	0.959091
ENSG00000053328	METTL24	0.183683	-1.13745	4.08047	-0.278754	0.780433
ENSG00000053371	AKR7A2	1160.15	-0.00788047	0.0994378	-0.0792503	0.936834	0.997272
ENSG00000053372	MRTO4	3302.13	-0.0954565	0.0602612	-1.58405	0.113183	0.713445
ENSG00000053438	NNAT	0
ENSG00000053501	USE1	237.525	-0.0173883	0.152899	-0.113724	0.909456	0.995354
ENSG00000053524	MCF2L2	20.3386	0.503625	0.579944	0.868402	0.385174	0.932233
ENSG00000053702	NRIP2	0
ENSG00000053747	LAMA3	2214.79	0.0207115	0.0818914	0.252914	0.800334	0.988254
ENSG00000053770	AP5M1	1313.17	-0.00399897	0.0973444	-0.0410806	0.967232	0.998849
ENSG00000053900	ANAPC4	521.83	-0.0474967	0.110744	-0.428887	0.668005	0.978787
ENSG00000053918	KCNQ1	8.28347	-0.225141	0.827055	-0.27222	0.785453	0.987257
ENSG00000054116	TRAPPC3	1722.51	-0.224883	0.0880976	-2.55265	0.0106906	0.243552
ENSG00000054118	THRAP3	5122.9	-0.0445827	0.0545387	-0.81745	0.413671	0.945449
ENSG00000054148	PHPT1	3426.49	0.0758281	0.080317	0.94411	0.345113	0.920918
ENSG00000054179	ENTPD2	11.0461	0.664678	0.658442	1.00947	0.312749	0.91199
ENSG00000054219	LY75	8.05215	0.848307	0.825407	1.02774	0.30407	0.908675
ENSG00000054267	ARID4B	1559.28	-0.0173755	0.0806456	-0.215456	0.829412	0.988254
ENSG00000054277	OPN3	1487.26	0.135155	0.073458	1.8399	0.0657829	0.578131
ENSG00000054282	SDCCAG8	344.467	0.0506536	0.143448	0.353114	0.724003	0.979435
ENSG00000054356	PTPRN	10.9894	-0.556066	0.850606	-0.653729	0.513286	0.965392
ENSG00000054392	HHAT	256.883	0.147301	0.153205	0.961465	0.336318	0.919368
ENSG00000054523	KIF1B	1821.7	0.0147168	0.104195	0.141242	0.887679	0.992629
ENSG00000054598	FOXC1	237.363	0.135516	0.149679	0.905373	0.365268	0.925629
ENSG00000054611	TBC1D22A	714.21	0.0526796	0.101235	0.520371	0.602805	0.978787
ENSG00000054654	SYNE2	1155.43	0.144204	0.0927367	1.55498	0.119951	0.729699
ENSG00000054690	PLEKHH1	135.484	0.203605	0.31018	0.656408	0.511561	0.965392
ENSG00000054793	ATP9A	2354.2	0.0492061	0.0930947	0.52856	0.597111	0.978787
ENSG00000054796	SPO11	0
ENSG00000054803	CBLN4	0
ENSG00000054938	CHRDL2	12.4122	0.57407	0.688548	0.833739	0.404428	0.939384
ENSG00000054965	FAM168A	1827.93	-0.0395062	0.089353	-0.442136	0.658391	0.978787
ENSG00000054967	RELT	372.305	-0.0329213	0.129554	-0.254112	0.799409	0.988254
ENSG00000054983	GALC	1401.7	0.0317187	0.0797068	0.397942	0.690673	0.978787
ENSG00000055044	NOP58	4728.8	-0.0696028	0.0550308	-1.2648	0.205944	0.837954
ENSG00000055070	SZRD1	5534.82	0.104075	0.0654482	1.59018	0.111793	0.710732
ENSG00000055118	KCNH2	52.1455	-0.12923	0.314607	-0.410765	0.681245	0.978787
ENSG00000055130	CUL1	3403.45	-0.0263255	0.0574892	-0.457921	0.64701	0.978787
ENSG00000055147	FAM114A2	701.701	0.0383865	0.105125	0.365151	0.714999	0.979118
ENSG00000055163	CYFIP2	3034.43	-0.0210129	0.0825359	-0.25459	0.79904	0.988254
ENSG00000055208	TAB2	1805.04	-0.0431814	0.0688745	-0.626957	0.530687	0.969637
ENSG00000055211	GINM1	1108.62	0.0410956	0.0808277	0.508435	0.611149	0.978787
ENSG00000055332	EIF2AK2	6187.86	1.21661	0.095907	12.6853	7.13472e-37	2.14072e-34
ENSG00000055483	USP36	2800.67	0.0324793	0.0666369	0.487407	0.62597	0.978787
ENSG00000055609	KMT2C	1197.5	-0.0240913	0.0989369	-0.243502	0.807617	0.988254
ENSG00000055732	MCOLN3	189.95	-0.111992	0.182415	-0.613941	0.539254	0.971829
ENSG00000055813	CCDC85A	25.1422	-0.204259	0.430167	-0.474836	0.634904	0.978787
ENSG00000055917	PUM2	4428.69	-0.0846783	0.0826315	-1.02477	0.305472	0.908675
ENSG00000055950	MRPL43	1734.01	-0.0845965	0.0767645	-1.10203	0.27045	0.886813
ENSG00000055955	ITIH4	1.8744	4.20326	2.33807	1.79775	0.0722172
ENSG00000055957	ITIH1	0
ENSG00000056050	HPF1	632.823	-0.048259	0.102097	-0.472679	0.636442	0.978787
ENSG00000056097	ZFR	5368.21	-0.170686	0.0654107	-2.60945	0.00906881	0.219362
ENSG00000056277	ZNF280C	344.207	0.0727146	0.150183	0.484172	0.628264	0.978787
ENSG00000056291	NPFFR2	0.282074	1.55026	4.0505	0.382733	0.701917
ENSG00000056487	PHF21B	18.6402	-0.534165	0.504547	-1.0587	0.289736	0.897399
ENSG00000056558	TRAF1	131.766	-0.229801	0.193253	-1.18912	0.234392	0.856499
ENSG00000056586	RC3H2	2202.63	-0.0865919	0.105621	-0.819835	0.41231	0.945278
ENSG00000056736	IL17RB	38.2853	-0.362925	0.374895	-0.968071	0.333009	0.918885
ENSG00000056972	TRAF3IP2	435.463	0.214915	0.121846	1.76383	0.0777604	0.618487
ENSG00000056998	GYG2	482.117	-0.0674523	0.108958	-0.619064	0.535874	0.970746
ENSG00000057019	DCBLD2	37943.6	-0.0566926	0.0545786	-1.03873	0.298929	0.90363
ENSG00000057149	SERPINB3	1.32149	-0.221845	1.77411	-0.125046	0.900487
ENSG00000057252	SOAT1	2882.19	-0.0387759	0.0842233	-0.460393	0.645234	0.978787
ENSG00000057294	PKP2	431.025	-0.177315	0.12252	-1.44724	0.147831	0.775851
ENSG00000057468	MSH4	0.876222	-3.34147	2.94708	-1.13382	0.256869
ENSG00000057593	F7	4.96596	0.500375	1.00522	0.497776	0.618642
ENSG00000057608	GDI2	11295.6	-0.0449893	0.0504645	-0.891504	0.372659	0.926346
ENSG00000057657	PRDM1	167.424	0.208944	0.214484	0.974172	0.329971	0.917806
ENSG00000057663	ATG5	1095.17	0.0322019	0.0973102	0.33092	0.740705	0.981271
ENSG00000057704	TMCC3	33.691	0.105064	0.392248	0.267851	0.788814	0.987257
ENSG00000057757	PITHD1	797.436	-0.0308069	0.0912105	-0.337756	0.735547	0.981066
ENSG00000057935	MTA3	1515.48	-0.023892	0.0722243	-0.330803	0.740793	0.981271
ENSG00000058056	USP13	1084.95	-0.0626843	0.103628	-0.604894	0.545249	0.973032
ENSG00000058063	ATP11B	1046.8	-0.2184	0.0968406	-2.25525	0.0241173	0.373739
ENSG00000058085	LAMC2	2072.65	-0.0974248	0.0787501	-1.23714	0.216036	0.842849
ENSG00000058091	CDK14	5.3233	-0.502519	1.10771	-0.453657	0.650076
ENSG00000058262	SEC61A1	9879.67	0.0228499	0.0577241	0.395847	0.692218	0.978787
ENSG00000058272	PPP1R12A	2096.88	-0.29235	0.121611	-2.40397	0.016218	0.311102
ENSG00000058335	RASGRF1	14.3644	0.398259	0.596771	0.667357	0.504544	0.965002
ENSG00000058404	CAMK2B	11.913	-1.27524	0.69397	-1.83759	0.0661223	0.580608
ENSG00000058453	CROCC	184.74	-0.419569	0.177372	-2.36548	0.0180067	0.32705
ENSG00000058600	POLR3E	1287.24	-0.0390681	0.0947995	-0.412113	0.680256	0.978787
ENSG00000058668	ATP2B4	1361.76	0.112426	0.0714352	1.57382	0.115529	0.720216
ENSG00000058673	ZC3H11A	2820.69	0.0859396	0.0606653	1.41662	0.156594	0.790088
ENSG00000058729	RIOK2	876.893	-0.212146	0.312504	-0.67886	0.497227	0.963293
ENSG00000058799	YIPF1	583.392	0.00479801	0.107221	0.0447487	0.964308	0.998849
ENSG00000058804	NDC1	3041.99	-0.032749	0.0575378	-0.569173	0.569239	0.976267
ENSG00000058866	DGKG	738.135	-0.0454792	0.112419	-0.404552	0.685807	0.978787
ENSG00000059122	FLYWCH1	1213.52	-0.00246637	0.147413	-0.0167311	0.986651	0.99917
ENSG00000059145	UNKL	1326.77	-0.413384	0.0782641	-5.2819	1.27848e-07	1.54094e-05
ENSG00000059377	TBXAS1	219.959	0.0815922	0.181045	0.450673	0.652225	0.978787
ENSG00000059378	PARP12	1060.14	1.68637	0.0905299	18.6278	1.91158e-77	9.62752e-75
ENSG00000059573	ALDH18A1	3219.41	0.0196062	0.0599336	0.327133	0.743567	0.981271
ENSG00000059588	TARBP1	1235.73	0.0750142	0.0766074	0.979203	0.32748	0.917806
ENSG00000059691	GATB	688.319	0.118423	0.0964302	1.22807	0.219422	0.843502
ENSG00000059728	MXD1	185.85	-0.240187	0.195457	-1.22884	0.21913	0.843502
ENSG00000059758	CDK17	808.009	-0.0572892	0.0948079	-0.604266	0.545667	0.973032
ENSG00000059769	DNAJC25	333.327	-0.125488	0.138707	-0.904705	0.365622	0.925629
ENSG00000059804	SLC2A3	1027.28	0.384545	0.118938	3.23315	0.00122435	0.0585282
ENSG00000059915	PSD	7.58789	-0.679244	0.911716	-0.745017	0.456261	0.956485
ENSG00000060069	CTDP1	825.946	-0.0871254	0.0876851	-0.993617	0.32041	0.915071
ENSG00000060138	YBX3	5588.69	-0.00518056	0.0617861	-0.0838468	0.933178	0.996509
ENSG00000060140	STYK1	14.6762	-0.0989358	0.720393	-0.137336	0.890765	0.993138
ENSG00000060237	WNK1	9895.18	0.0319838	0.0952284	0.335865	0.736973	0.981066
ENSG00000060303	RPS17P5	0
ENSG00000060339	CCAR1	4208.15	-0.138436	0.0766879	-1.80518	0.0710461	0.594948
ENSG00000060491	OGFR	1505.78	0.338835	0.0795582	4.25896	2.05384e-05	0.00184479
ENSG00000060558	GNA15	2.4548	-0.0305925	1.46186	-0.0209271	0.983304
ENSG00000060566	CREB3L3	8.24947	-0.197832	0.765649	-0.258385	0.79611	0.988254
ENSG00000060642	PIGV	500.66	0.083482	0.122424	0.681908	0.495297	0.962976
ENSG00000060656	PTPRU	770.442	0.0950256	0.102234	0.929491	0.352635	0.921411
ENSG00000060688	SNRNP40	1436.84	0.0402085	0.0933779	0.4306	0.666759	0.978787
ENSG00000060709	RIMBP2	0.564263	-0.63906	3.60517	-0.177262	0.859302
ENSG00000060718	COL11A1	426.831	0.448314	0.138808	3.22975	0.00123897	0.0590267
ENSG00000060749	QSER1	3129.46	-0.13815	0.10024	-1.3782	0.168142	0.804958
ENSG00000060762	MPC1	115.209	-0.0430067	0.236457	-0.18188	0.855677	0.988254
ENSG00000060971	ACAA1	1386.01	0.202125	0.0884005	2.28647	0.0222267	0.358628
ENSG00000060982	BCAT1	1651.37	-0.0395706	0.0865114	-0.457403	0.647381	0.978787
ENSG00000061273	HDAC7	2348.36	0.0228535	0.0594242	0.384583	0.700547	0.978787
ENSG00000061337	LZTS1	3.55932	-0.300952	1.15164	-0.261325	0.793842
ENSG00000061455	PRDM6	9.66496	-1.42502	0.923796	-1.54258	0.122934	0.732841
ENSG00000061492	WNT8A	0
ENSG00000061656	SPAG4	31.6186	0.069311	0.388577	0.178371	0.858431	0.988254
ENSG00000061676	NCKAP1	8887.25	-0.0601142	0.0588651	-1.02122	0.30715	0.908675
ENSG00000061794	MRPS35	4305.45	-0.013871	0.0592328	-0.234177	0.814847	0.988254
ENSG00000061918	GUCY1B1	36.1687	-0.186866	0.372586	-0.501537	0.615993	0.978787
ENSG00000061936	SFSWAP	1236.4	-0.0304746	0.0760482	-0.400727	0.688621	0.978787
ENSG00000061938	TNK2	555.675	0.10418	0.104187	0.999927	0.317346	0.915071
ENSG00000061987	MON2	1818.8	-0.0482861	0.110522	-0.436891	0.662191	0.978787
ENSG00000062038	CDH3	9.24203	-1.04648	0.726012	-1.44141	0.14947	0.780321
ENSG00000062096	ARSF	0
ENSG00000062194	GPBP1	2072.36	-0.000622255	0.0625487	-0.00994833	0.992063	0.99917
ENSG00000062282	DGAT2	195.304	0.0376423	0.169126	0.22257	0.82387	0.988254
ENSG00000062370	ZNF112	110.274	0.244488	0.235762	1.03701	0.299731	0.903937
ENSG00000062485	CS	9530.78	-0.0634128	0.0451624	-1.40411	0.160287	0.794226
ENSG00000062524	LTK	1.66656	-0.711773	1.77072	-0.401969	0.687707
ENSG00000062582	MRPS24	2617.99	-0.195132	0.0837208	-2.33075	0.0197666	0.34057
ENSG00000062598	ELMO2	1451.38	0.100546	0.0868641	1.15751	0.247064	0.866362
ENSG00000062650	WAPL	1455.32	-0.0495031	0.0857397	-0.577364	0.563693	0.975276
ENSG00000062716	VMP1	6640.44	0.0696948	0.0488856	1.42567	0.153963	0.785178
ENSG00000062725	APPBP2	1386.4	-0.153653	0.0978792	-1.56983	0.116455	0.721235
ENSG00000062822	POLD1	2303.15	-0.0297704	0.0723807	-0.411303	0.68085	0.978787
ENSG00000063015	SEZ6	0
ENSG00000063046	EIF4B	20776.6	-0.117245	0.0491712	-2.38443	0.0171056	0.316151
ENSG00000063127	SLC6A16	24.8143	0.513441	0.517641	0.991886	0.321253	0.915071
ENSG00000063169	BICRA	454.284	0.00571076	0.123613	0.0461986	0.963152	0.998849
ENSG00000063176	SPHK2	761.031	0.0839819	0.0951607	0.882527	0.377492	0.92839
ENSG00000063177	RPL18	19842.8	0.0852221	0.0767378	1.11056	0.266757	0.884272
ENSG00000063180	CA11	210.166	0.230023	0.22087	1.04144	0.297673	0.903021
ENSG00000063241	ISOC2	1247.29	0.0167495	0.100407	0.166816	0.867514	0.990021
ENSG00000063244	U2AF2	15203.3	0.0706963	0.0509093	1.38867	0.164933	0.8012
ENSG00000063245	EPN1	5750.33	-0.200811	0.0990776	-2.02681	0.042682	0.490597
ENSG00000063322	MED29	3957.8	0.0317212	0.0583833	0.543327	0.586905	0.977163
ENSG00000063438	AHRR	21.4163	-0.137532	0.530488	-0.259256	0.795438	0.988225
ENSG00000063515	GSC2	0
ENSG00000063587	ZNF275	448.406	-0.0751548	0.112539	-0.667811	0.504254	0.965002
ENSG00000063601	MTMR1	1286.98	-0.0615662	0.0886289	-0.694651	0.487274	0.960235
ENSG00000063660	GPC1	10300.4	0.0946363	0.0738697	1.28113	0.20015	0.828888
ENSG00000063761	ADCK1	257.888	0.199729	0.155345	1.28571	0.198545	0.827553
ENSG00000063854	HAGH	1405.92	0.00269844	0.0755247	0.0357292	0.971498	0.99917
ENSG00000063978	RNF4	2563.43	-0.0470379	0.0591765	-0.794875	0.426686	0.949823
ENSG00000064012	CASP8	1659.97	0.221379	0.0793182	2.79102	0.0052542	0.157919
ENSG00000064042	LIMCH1	3137.69	0.0282637	0.0691789	0.40856	0.682863	0.978787
ENSG00000064102	INTS13	1650.34	-0.0739187	0.075897	-0.973935	0.330089	0.917806
ENSG00000064115	TM7SF3	5562.74	0.050686	0.0571316	0.88718	0.374982	0.926906
ENSG00000064195	DLX3	4.7309	0.310676	1.10049	0.282308	0.777707
ENSG00000064199	SPA17	481.845	-0.0563477	0.118266	-0.476449	0.633755	0.978787
ENSG00000064201	TSPAN32	0
ENSG00000064205	CCN5	428.843	0.251597	0.147038	1.7111	0.0870633	0.646953
ENSG00000064218	DMRT3	0.305024	-0.164229	4.08047	-0.0402475	0.967896
ENSG00000064225	ST3GAL6	45.127	-0.568035	0.499552	-1.13709	0.255501	0.874746
ENSG00000064270	ATP2C2	9.61571	0.388542	0.78937	0.492218	0.622566	0.978787
ENSG00000064300	NGFR	11.7637	0.495495	0.678162	0.730644	0.464997	0.956485
ENSG00000064309	CDON	267.243	-0.00617294	0.219865	-0.028076	0.977602	0.99917
ENSG00000064313	TAF2	1721.19	-0.120591	0.0726513	-1.65986	0.096943	0.674773
ENSG00000064393	HIPK2	4201.79	-0.177485	0.111152	-1.59678	0.110316	0.708385
ENSG00000064419	TNPO3	4829.12	-0.0335833	0.0511369	-0.656732	0.511353	0.965392
ENSG00000064489	BORCS8-MEF2B	87.8697	-0.277973	0.266412	-1.04339	0.296766	0.902636
ENSG00000064490	RFXANK	603.352	0.0649116	0.111008	0.584744	0.55872	0.973952
ENSG00000064545	TMEM161A	652.961	0.0947062	0.128701	0.735863	0.461814	0.956485
ENSG00000064547	LPAR2	38.2633	-0.0027759	0.389243	-0.00713154	0.99431	0.99917
ENSG00000064601	CTSA	5163.57	0.117564	0.0740833	1.58692	0.112531	0.712311
ENSG00000064607	SUGP2	1973.35	0.0452414	0.0786624	0.575134	0.565201	0.975457
ENSG00000064651	SLC12A2	4150.44	-0.0562751	0.10153	-0.554273	0.579392	0.977163
ENSG00000064652	SNX24	543.381	0.0124459	0.115815	0.107463	0.914422	0.996205
ENSG00000064655	EYA2	183.438	0.0806724	0.181083	0.4455	0.655958	0.978787
ENSG00000064666	CNN2	2400.07	-0.0268122	0.0705962	-0.379797	0.704096	0.97897
ENSG00000064687	ABCA7	341.543	0.273697	0.14264	1.9188	0.0550093	0.543236
ENSG00000064692	SNCAIP	0.835178	0.506023	2.4851	0.203623	0.838648
ENSG00000064703	DDX20	701.369	0.0104029	0.0929367	0.111935	0.910875	0.995354
ENSG00000064726	BTBD1	3757.63	-0.0611405	0.0553647	-1.10432	0.269453	0.885741
ENSG00000064763	FAR2	4.65664	0.00790905	1.07335	0.00736856	0.994121
ENSG00000064787	BCAS1	219.645	0.00634451	0.169186	0.0375002	0.970086	0.998859
ENSG00000064835	POU1F1	0.417709	2.0987	3.8812	0.540735	0.58869
ENSG00000064886	CHI3L2	0.668262	0.776925	2.95905	0.262559	0.792891
ENSG00000064932	SBNO2	1452.18	-0.402851	0.454857	-0.885666	0.375797	0.927296
ENSG00000064933	PMS1	600.549	-0.0791918	0.110981	-0.713562	0.475498	0.957272
ENSG00000064961	HMG20B	885.376	0.0137389	0.102385	0.134189	0.893253	0.993271
ENSG00000064989	CALCRL	14.017	1.35104	0.651102	2.075	0.0379864	0.469596
ENSG00000064995	TAF11	551.989	-0.0718602	0.102017	-0.704395	0.481187	0.959013
ENSG00000064999	ANKS1A	731.55	0.00867295	0.101992	0.0850352	0.932233	0.996509
ENSG00000065000	AP3D1	4685.06	-0.0148542	0.063158	-0.235191	0.81406	0.988254
ENSG00000065029	ZNF76	274.964	0.292871	0.15541	1.8845	0.0594969	0.558605
ENSG00000065054	SLC9A3R2	1161.21	0.19529	0.088872	2.19743	0.02799	0.404992
ENSG00000065057	NTHL1	974.161	0.157009	0.0890707	1.76275	0.0779431	0.618544
ENSG00000065060	UHRF1BP1	1436.46	0.15494	0.0889982	1.74094	0.0816943	0.631611
ENSG00000065135	GNAI3	2932.16	-0.0492545	0.057789	-0.852317	0.394038	0.935684
ENSG00000065150	IPO5	7707.13	-0.0670473	0.0511713	-1.31025	0.19011	0.822905
ENSG00000065154	OAT	2462.3	-0.0828954	0.0627095	-1.3219	0.186203	0.817758
ENSG00000065183	WDR3	2581.88	-0.0423335	0.0793966	-0.533191	0.593901	0.978787
ENSG00000065243	PKN2	1786.97	-0.145797	0.0959396	-1.51967	0.128593	0.743676
ENSG00000065268	WDR18	1014.41	-0.0425301	0.0969889	-0.438505	0.661021	0.978787
ENSG00000065308	TRAM2	2370.5	-0.0282858	0.076287	-0.370782	0.7108	0.979118
ENSG00000065320	NTN1	27.0049	0.248215	0.472228	0.525626	0.599148	0.978787
ENSG00000065325	GLP2R	736.27	0.088244	0.12612	0.699683	0.484125	0.959621
ENSG00000065328	MCM10	2056.71	-0.0830273	0.0715409	-1.16056	0.245823	0.865932
ENSG00000065357	DGKA	462.72	-0.189417	0.129444	-1.46332	0.14338	0.768506
ENSG00000065361	ERBB3	128.372	0.404789	0.342737	1.18105	0.237584	0.859376
ENSG00000065371	ROPN1	0.164241	-1.13745	4.08047	-0.278754	0.780433
ENSG00000065413	ANKRD44	134.854	-0.324247	0.259005	-1.2519	0.210608	0.839019
ENSG00000065427	KARS1	7652.93	0.0717596	0.0579392	1.23853	0.215518	0.842849
ENSG00000065457	ADAT1	1013.6	-0.00167838	0.0789594	-0.0212562	0.983041	0.99917
ENSG00000065485	PDIA5	586.701	0.106504	0.113384	0.939321	0.347566	0.921052
ENSG00000065491	TBC1D22B	456.962	0.0546672	0.113425	0.481967	0.629829	0.978787
ENSG00000065518	NDUFB4	2881.27	-0.21539	0.0665818	-3.23496	0.00121659	0.058453
ENSG00000065526	SPEN	2955.99	0.169287	0.0828491	2.04332	0.0410212	0.483275
ENSG00000065534	MYLK	2518.3	-0.169456	0.104062	-1.62841	0.103437	0.689659
ENSG00000065548	ZC3H15	3609.62	-0.0504216	0.057372	-0.878853	0.379481	0.929877
ENSG00000065559	MAP2K4	2340.28	-0.0738294	0.0598905	-1.23274	0.217673	0.842849
ENSG00000065600	PACC1	606.382	-0.0934284	0.100312	-0.931375	0.35166	0.921411
ENSG00000065609	SNAP91	40.298	-0.405391	0.453615	-0.893688	0.371489	0.926346
ENSG00000065613	SLK	3532.56	-0.154014	0.0670699	-2.29633	0.0216572	0.356736
ENSG00000065615	CYB5R4	1257.45	-0.154146	0.0994324	-1.55026	0.121079	0.730934
ENSG00000065618	COL17A1	47.3563	0.249975	0.338538	0.738395	0.460275	0.956485
ENSG00000065621	GSTO2	36.0025	0.0967099	0.392508	0.24639	0.80538	0.988254
ENSG00000065665	SEC61A2	574.011	0.0448348	0.0994739	0.450719	0.652192	0.978787
ENSG00000065675	PRKCQ	326.357	0.16301	0.137452	1.18594	0.235647	0.857753
ENSG00000065717	TLE2	67.9159	-0.0137899	0.27209	-0.0506814	0.959579	0.998849
ENSG00000065802	ASB1	1345.28	0.0388892	0.0942889	0.412447	0.680012	0.978787
ENSG00000065809	FAM107B	7542.61	-0.117473	0.0754292	-1.5574	0.119375	0.728439
ENSG00000065833	ME1	5048.13	-0.000436914	0.0553084	-0.00789958	0.993697	0.99917
ENSG00000065882	TBC1D1	1160.25	-0.180126	0.114568	-1.57223	0.115898	0.720216
ENSG00000065883	CDK13	1472.29	-0.0709334	0.0835281	-0.849216	0.395761	0.935684
ENSG00000065911	MTHFD2	9493.52	0.0698842	0.0507077	1.37818	0.168148	0.804958
ENSG00000065923	SLC9A7	1606.55	-0.107044	0.0862196	-1.24153	0.214411	0.841766
ENSG00000065970	FOXJ2	1017.14	-0.00158191	0.0896987	-0.0176358	0.985929	0.99917
ENSG00000065978	YBX1	24845.3	-0.0655265	0.062467	-1.04898	0.294189	0.900294
ENSG00000065989	PDE4A	191.799	0.163916	0.212832	0.770166	0.441201	0.956485
ENSG00000066027	PPP2R5A	1249.85	0.0323159	0.0738374	0.437663	0.66163	0.978787
ENSG00000066032	CTNNA2	10.4386	-1.00675	0.939248	-1.07187	0.283779	0.89584
ENSG00000066044	ELAVL1	3422.72	-0.0426716	0.0547252	-0.779743	0.435542	0.953581
ENSG00000066056	TIE1	2.55366	0.540699	1.35814	0.398119	0.690543
ENSG00000066084	DIP2B	2630.19	-0.00787917	0.0773864	-0.101816	0.918903	0.996317
ENSG00000066117	SMARCD1	2467.66	0.0558813	0.0662318	0.843723	0.398824	0.936408
ENSG00000066135	KDM4A	1590.08	0.0640793	0.0685255	0.935116	0.349728	0.921052
ENSG00000066136	NFYC	1447.14	0.0442662	0.0944808	0.468521	0.639412	0.978787
ENSG00000066185	ZMYND12	6.32375	-0.343398	0.870176	-0.394631	0.693116
ENSG00000066230	SLC9A3	488.981	0.0143775	0.10931	0.13153	0.895356	0.99378
ENSG00000066248	NGEF	423.29	-0.0162995	0.127306	-0.128034	0.898122	0.99407
ENSG00000066279	ASPM	2555.63	-0.0745071	0.0930085	-0.801079	0.423086	0.948849
ENSG00000066294	CD84	1.5641	-3.07229	2.04542	-1.50203	0.133089
ENSG00000066322	ELOVL1	4155.16	0.0587776	0.063028	0.932564	0.351045	0.921358
ENSG00000066336	SPI1	0
ENSG00000066379	ZNRD1	64.5586	-0.737107	0.324405	-2.27218	0.0230756	0.364312
ENSG00000066382	MPPED2	1.03155	0.856077	2.54423	0.336478	0.73651
ENSG00000066405	CLDN18	0
ENSG00000066422	ZBTB11	1359.49	-0.100152	0.079176	-1.26493	0.205896	0.837954
ENSG00000066427	ATXN3	533.17	0.133136	0.124541	1.06902	0.285063	0.89584
ENSG00000066455	GOLGA5	1435.97	-0.03415	0.0791576	-0.431418	0.666165	0.978787
ENSG00000066468	FGFR2	16.5998	-0.0211571	0.568278	-0.0372302	0.970301	0.998859
ENSG00000066557	LRRC40	686.854	-0.139716	0.101426	-1.37752	0.168352	0.805053
ENSG00000066583	ISOC1	791.102	-0.0599694	0.0984292	-0.609265	0.542349	0.972543
ENSG00000066629	EML1	1895.81	-0.220942	0.0923611	-2.39215	0.0167498	0.312442
ENSG00000066651	TRMT11	508.328	-0.0642196	0.108382	-0.592532	0.553494	0.973452
ENSG00000066654	THUMPD1	1824.59	-0.0472946	0.0707076	-0.668875	0.503575	0.964604
ENSG00000066697	MSANTD3	1940.97	-0.203688	0.0638451	-3.19034	0.00142104	0.0645654
ENSG00000066735	KIF26A	193.762	-0.126299	0.166287	-0.759523	0.44754	0.956485
ENSG00000066739	ATG2B	1174.72	-0.134318	0.116682	-1.15114	0.249675	0.870006
ENSG00000066777	ARFGEF1	2281.52	0.00214901	0.066114	0.0325047	0.97407	0.99917
ENSG00000066813	ACSM2B	0.535864	1.1931	3.20572	0.372177	0.709761
ENSG00000066827	ZFAT	387.423	0.300979	0.134938	2.2305	0.0257146	0.385544
ENSG00000066855	MTFR1	1696.14	-0.0838879	0.0853249	-0.983158	0.32553	0.917573
ENSG00000066923	STAG3	17.6293	0.37725	0.527157	0.715631	0.474219	0.9569
ENSG00000066926	FECH	1728.19	-0.290692	0.0745713	-3.89817	9.69215e-05	0.00697341
ENSG00000066933	MYO9A	1476.74	-0.084028	0.108311	-0.775805	0.437864	0.955041
ENSG00000067048	DDX3Y	1968.66	0.0343157	0.0963477	0.356165	0.721717	0.979308
ENSG00000067057	PFKP	19179.5	-0.0440301	0.0573607	-0.767601	0.442724	0.956485
ENSG00000067064	IDI1	5396.51	0.138976	0.0531453	2.61502	0.00892233	0.216562
ENSG00000067066	SP100	1696.19	1.14237	0.0720856	15.8474	1.46521e-56	6.26132e-54
ENSG00000067082	KLF6	2420.75	-0.118596	0.0641707	-1.84814	0.0645822	0.573765
ENSG00000067113	PLPP1	981.073	-0.0156556	0.0887392	-0.176423	0.859962	0.988254
ENSG00000067141	NEO1	4380.14	0.0475631	0.0625763	0.760082	0.447206	0.956485
ENSG00000067167	TRAM1	18612.8	0.00390156	0.0469347	0.0831275	0.93375	0.996509
ENSG00000067177	PHKA1	2538.4	-0.0250815	0.0623177	-0.402477	0.687333	0.978787
ENSG00000067182	TNFRSF1A	13619.2	0.0870713	0.0548092	1.58863	0.112145	0.711092
ENSG00000067191	CACNB1	204.041	0.18776	0.182078	1.0312	0.302446	0.90708
ENSG00000067208	EVI5	518.039	0.00213731	0.139637	0.0153062	0.987788	0.99917
ENSG00000067221	STOML1	280.146	0.0730912	0.149935	0.487487	0.625913	0.978787
ENSG00000067225	PKM	210518	0.0979343	0.0528944	1.85151	0.0640968	0.573306
ENSG00000067248	DHX29	2415.9	-0.128194	0.0773088	-1.65821	0.0972748	0.675629
ENSG00000067334	DNTTIP2	2339.25	-0.0450704	0.0822017	-0.54829	0.583493	0.977163
ENSG00000067365	METTL22	408.861	0.158897	0.12736	1.24762	0.212169	0.840272
ENSG00000067369	TP53BP1	2254.03	0.0806747	0.0796188	1.01326	0.310935	0.910465
ENSG00000067445	TRO	16.9147	0.710873	0.705501	1.00761	0.31364	0.912483
ENSG00000067533	RRP15	1408.49	-0.14801	0.0961411	-1.5395	0.123682	0.734203
ENSG00000067560	RHOA	14988.7	-0.109207	0.0409963	-2.66382	0.00772598	0.199545
ENSG00000067596	DHX8	3227.78	0.14414	0.0592541	2.43257	0.014992	0.298513
ENSG00000067601	PMS2P4	62.0708	0.380763	0.328785	1.15809	0.246827	0.866255
ENSG00000067606	PRKCZ	394.89	-0.019884	0.117381	-0.169397	0.865485	0.988903
ENSG00000067646	ZFY	289.822	-0.146278	0.132143	-1.10697	0.268309	0.885421
ENSG00000067704	IARS2	7814.94	-0.102406	0.0518218	-1.97612	0.0481409	0.516402
ENSG00000067715	SYT1	1236.91	0.104629	0.0799731	1.30831	0.190769	0.823556
ENSG00000067798	NAV3	875.206	-0.425419	0.133444	-3.18799	0.00143265	0.0647539
ENSG00000067829	IDH3G	1544.79	-0.0198062	0.0951577	-0.208141	0.835119	0.988254
ENSG00000067836	ROGDI	264.001	-0.030385	0.149497	-0.203248	0.838941	0.988254
ENSG00000067840	PDZD4	108.263	-0.23729	0.225298	-1.05323	0.292236	0.899415
ENSG00000067842	ATP2B3	1.65706	-0.821612	1.91315	-0.429455	0.667592
ENSG00000067900	ROCK1	2482.35	-0.0930061	0.0938855	-0.990633	0.321865	0.915071
ENSG00000067955	CBFB	1459.03	-0.0174839	0.0841759	-0.207707	0.835458	0.988254
ENSG00000067992	PDK3	821.366	0.0284731	0.108669	0.262016	0.793309	0.988225
ENSG00000068001	HYAL2	1037.37	0.110997	0.0835982	1.32775	0.184262	0.817758
ENSG00000068024	HDAC4	811.725	-0.113525	0.0971425	-1.16865	0.242546	0.862121
ENSG00000068028	RASSF1	311.974	-0.150222	0.138645	-1.0835	0.278585	0.895042
ENSG00000068078	FGFR3	95.0116	-0.058258	0.238437	-0.244333	0.806973	0.988254
ENSG00000068079	IFI35	2570.92	2.62843	0.0784432	33.5074	3.7591e-246	5.89009e-243
ENSG00000068097	HEATR6	1433.58	-0.0607353	0.0934881	-0.649658	0.515913	0.965501
ENSG00000068120	COASY	5004.35	-0.00443439	0.0577152	-0.0768324	0.938757	0.997909
ENSG00000068137	PLEKHH3	682.918	0.0808049	0.102509	0.788268	0.43054	0.950699
ENSG00000068305	MEF2A	1201.92	0.0888686	0.0939616	0.945797	0.344252	0.920918
ENSG00000068308	OTUD5	2520.77	0.0848559	0.0633813	1.33882	0.180631	0.812849
ENSG00000068323	TFE3	3891.5	-0.0495518	0.0530575	-0.933926	0.350342	0.921052
ENSG00000068354	TBC1D25	539.58	-0.0420518	0.118336	-0.355358	0.722321	0.979433
ENSG00000068366	ACSL4	2989.14	0.0180358	0.0606259	0.297494	0.766089	0.985181
ENSG00000068383	INPP5A	750.628	0.0742859	0.0894915	0.830089	0.406489	0.94142
ENSG00000068394	GPKOW	1014.74	0.109729	0.0828955	1.3237	0.185603	0.817758
ENSG00000068400	GRIPAP1	1359.09	0.0650364	0.0750128	0.867004	0.38594	0.932233
ENSG00000068438	FTSJ1	1594.14	-0.0426878	0.0780076	-0.547225	0.584224	0.977163
ENSG00000068489	PRR11	3294.05	-0.349737	0.0836379	-4.18156	2.89517e-05	0.00240163
ENSG00000068615	REEP1	67.7681	-0.502659	0.298113	-1.68614	0.0917695	0.660894
ENSG00000068650	ATP11A	1477.17	-0.162044	0.124386	-1.30275	0.192659	0.8251
ENSG00000068654	POLR1A	5245.78	0.000276559	0.0912813	0.00302975	0.997583	0.99917
ENSG00000068697	LAPTM4A	6582.92	0.165985	0.0633939	2.61831	0.00883667	0.214853
ENSG00000068724	TTC7A	2145.76	0.0365537	0.0740584	0.493579	0.621603	0.978787
ENSG00000068745	IP6K2	1115.72	0.101938	0.0811232	1.25658	0.208904	0.838394
ENSG00000068781	STON1-GTF2A1L	0
ENSG00000068784	SRBD1	865.792	-0.0389026	0.0866922	-0.448743	0.653617	0.978787
ENSG00000068796	KIF2A	2505.89	-0.0540477	0.0765468	-0.706074	0.480142	0.959013
ENSG00000068831	RASGRP2	7.09392	-0.928888	1.00107	-0.927895	0.353462
ENSG00000068878	PSME4	3716.16	0.0459646	0.0842868	0.545335	0.585523	0.977163
ENSG00000068885	IFT80	775.958	-0.0801348	0.143167	-0.559729	0.575664	0.977163
ENSG00000068903	SIRT2	1279.63	-0.0267329	0.0793244	-0.337007	0.736112	0.981066
ENSG00000068912	ERLEC1	3190	0.0376801	0.0586107	0.642888	0.520297	0.965747
ENSG00000068971	PPP2R5B	271.768	0.0773529	0.140523	0.550463	0.582002	0.977163
ENSG00000068976	PYGM	3.51102	-1.17623	1.31145	-0.896891	0.369777
ENSG00000068985	PAGE1	3.42304	1.145	1.22472	0.934908	0.349836
ENSG00000069011	PITX1	590.783	-0.0698829	0.113712	-0.614563	0.538843	0.971683
ENSG00000069018	TRPC7	0
ENSG00000069020	MAST4	367.244	-0.0253339	0.128348	-0.197385	0.843526	0.988254
ENSG00000069122	ADGRF5	0.367912	-2.08108	4.03369	-0.515925	0.605907
ENSG00000069188	SDK2	212.711	-0.104367	0.218197	-0.478318	0.632424	0.978787
ENSG00000069206	ADAM7	0
ENSG00000069248	NUP133	2050.04	-0.176174	0.0706144	-2.49487	0.0126002	0.266
ENSG00000069275	NUCKS1	14747.8	-0.0252187	0.0491264	-0.513342	0.607712	0.978787
ENSG00000069329	VPS35	6828.98	-0.0358011	0.0531186	-0.673984	0.500321	0.964065
ENSG00000069345	DNAJA2	3303.41	-0.0520955	0.0577027	-0.902825	0.366619	0.925629
ENSG00000069399	BCL3	1071.1	0.207096	0.118415	1.7489	0.0803087	0.626505
ENSG00000069424	KCNAB2	1983.78	0.0421152	0.0931519	0.452113	0.651188	0.978787
ENSG00000069431	ABCC9	146.856	-0.129425	0.195157	-0.663184	0.507212	0.965392
ENSG00000069482	GAL	58.6654	-0.0832305	0.320966	-0.259312	0.795394	0.988225
ENSG00000069493	CLEC2D	59.1512	0.142945	0.317824	0.44976	0.652884	0.978787
ENSG00000069509	FUNDC1	715.505	0.038202	0.0931235	0.410229	0.681638	0.978787
ENSG00000069535	MAOB	12.5532	-0.396958	0.631807	-0.62829	0.529814	0.969637
ENSG00000069667	RORA	25.1286	-0.312142	0.43803	-0.712603	0.476092	0.957458
ENSG00000069696	DRD4	0.55263	-2.66995	3.99161	-0.668891	0.503565
ENSG00000069702	TGFBR3	848.443	-0.0580557	0.12491	-0.464781	0.642088	0.978787
ENSG00000069764	PLA2G10	0.651256	1.35942	2.97493	0.456959	0.6477
ENSG00000069812	HES2	37.2403	0.621032	0.394632	1.5737	0.115558	0.720216
ENSG00000069849	ATP1B3	4818.51	0.0323588	0.0623463	0.519018	0.603748	0.978787
ENSG00000069869	NEDD4	6937.7	-0.141317	0.0640361	-2.20683	0.027326	0.40099
ENSG00000069943	PIGB	552.415	-0.0409756	0.106173	-0.385934	0.699546	0.978787
ENSG00000069956	MAPK6	4348.74	-0.0571786	0.0664208	-0.860853	0.389319	0.933984
ENSG00000069966	GNB5	1961.08	-0.203126	0.0961419	-2.11277	0.0346203	0.451216
ENSG00000069974	RAB27A	322.91	0.0461329	0.164975	0.279636	0.779757	0.986372
ENSG00000069998	HDHD5	1325.71	-0.0166598	0.0849102	-0.196204	0.84445	0.988254
ENSG00000070010	UFD1	2258.41	-0.0452333	0.0745938	-0.606394	0.544253	0.972543
ENSG00000070018	LRP6	3556.63	-0.174367	0.10247	-1.70164	0.0888232	0.650009
ENSG00000070019	GUCY2C	0
ENSG00000070031	SCT	0
ENSG00000070047	PHRF1	7.8435	-2.55872	1.23722	-2.06812	0.0386292	0.472719
ENSG00000070061	ELP1	2850.65	0.0828482	0.0677692	1.22251	0.221516	0.845083
ENSG00000070081	NUCB2	1188.51	0.0225374	0.081915	0.275131	0.783215	0.986399
ENSG00000070087	PFN2	5949.13	-0.034936	0.0480142	-0.727618	0.466848	0.956485
ENSG00000070159	PTPN3	1919.7	0.0869155	0.0652236	1.33258	0.182671	0.814747
ENSG00000070182	SPTB	145.749	-0.108271	0.190995	-0.566879	0.570797	0.976667
ENSG00000070190	DAPP1	2.63749	1.01871	1.54793	0.65811	0.510467
ENSG00000070193	FGF10	0
ENSG00000070214	SLC44A1	2955.63	-0.0796461	0.0805421	-0.988875	0.322724	0.915152
ENSG00000070269	TMEM260	526.981	0.0477586	0.116465	0.410069	0.681755	0.978787
ENSG00000070366	SMG6	2023.81	0.188019	0.0712646	2.63832	0.00833169	0.209928
ENSG00000070367	EXOC5	3035.22	-0.154182	0.0969659	-1.59006	0.111821	0.710732
ENSG00000070371	CLTCL1	407.269	0.150901	0.143837	1.04911	0.294127	0.900294
ENSG00000070388	FGF22	1.92183	0.729279	1.70917	0.426686	0.669608
ENSG00000070404	FSTL3	4922.73	0.153116	0.0807817	1.89543	0.0580352	0.550748
ENSG00000070413	DGCR2	1784.3	0.0781223	0.097642	0.800089	0.423659	0.949059
ENSG00000070423	RNF126	707.71	-0.108752	0.106305	-1.02302	0.3063	0.908675
ENSG00000070444	MNT	1248.02	0.258205	0.0992036	2.60278	0.0092472	0.222768
ENSG00000070476	ZXDC	332.268	-0.0198446	0.125684	-0.157893	0.874541	0.991249
ENSG00000070495	JMJD6	1610.41	-0.0983522	0.0676266	-1.45434	0.145851	0.772039
ENSG00000070501	POLB	526.91	-0.269906	0.107516	-2.51038	0.01206	0.262474
ENSG00000070526	ST6GALNAC1	4.28641	0.927306	1.19005	0.779219	0.435851
ENSG00000070540	WIPI1	369.188	0.112162	0.130998	0.856208	0.391883	0.934964
ENSG00000070601	FRMPD1	13.7755	0.4691	0.647161	0.724858	0.468539	0.956485
ENSG00000070610	GBA2	902.446	0.0609725	0.0960088	0.635072	0.525382	0.968339
ENSG00000070614	NDST1	4672.3	-0.0324823	0.0707921	-0.458841	0.646348	0.978787
ENSG00000070669	ASNS	4185.98	0.132779	0.074295	1.78719	0.0739072	0.60771
ENSG00000070718	AP3M2	718.765	0.0306272	0.0944461	0.324282	0.745724	0.981271
ENSG00000070729	CNGB1	7.73318	-0.0035753	0.903976	-0.00395509	0.996844	0.99917
ENSG00000070731	ST6GALNAC2	11.662	0.23815	0.642207	0.370831	0.710764	0.979118
ENSG00000070748	CHAT	0
ENSG00000070756	PABPC1	37745.2	-0.00205532	0.0690159	-0.0297804	0.976242	0.99917
ENSG00000070759	TESK2	9.70192	0.278202	0.760316	0.365903	0.714438	0.979118
ENSG00000070761	CFAP20	1367.27	-0.051238	0.0713982	-0.717637	0.472981	0.956743
ENSG00000070770	CSNK2A2	3003.77	-0.0337066	0.0693436	-0.486081	0.62691	0.978787
ENSG00000070778	PTPN21	677.109	-0.0839005	0.102225	-0.820748	0.41179	0.945278
ENSG00000070785	EIF2B3	839.596	-0.0826706	0.0901812	-0.916716	0.359292	0.923092
ENSG00000070808	CAMK2A	6.09182	1.23898	0.954114	1.29857	0.194093
ENSG00000070814	TCOF1	6528.48	-0.0104483	0.052669	-0.198377	0.84275	0.988254
ENSG00000070831	CDC42	6990.33	-0.00698182	0.0559777	-0.124725	0.900741	0.99407
ENSG00000070882	OSBPL3	1060.2	-0.0628314	0.103154	-0.609106	0.542454	0.972543
ENSG00000070886	EPHA8	0.51177	1.61853	3.231	0.500937	0.616415
ENSG00000070915	SLC12A3	0.361595	-0.175769	4.08047	-0.0430757	0.965641
ENSG00000070950	RAD18	1129.35	-0.196652	0.0849959	-2.31367	0.0206858	0.348103
ENSG00000070961	ATP2B1	7097.62	-0.0320813	0.0772458	-0.415315	0.677911	0.978787
ENSG00000070985	TRPM5	0.164241	-1.13745	4.08047	-0.278754	0.780433
ENSG00000071051	NCK2	726.776	-0.183556	0.110085	-1.66741	0.0954334	0.670889
ENSG00000071054	MAP4K4	6171.3	-0.089957	0.0664695	-1.35336	0.175941	0.809242
ENSG00000071073	MGAT4A	307.2	-0.0530055	0.196159	-0.270217	0.786993	0.987257
ENSG00000071082	RPL31	12986.2	0.0220198	0.054918	0.400957	0.688452	0.978787
ENSG00000071127	WDR1	13380.7	-0.062088	0.0586279	-1.05902	0.289592	0.897287
ENSG00000071189	SNX13	1222.82	-0.0911935	0.0952603	-0.957309	0.338411	0.919368
ENSG00000071203	MS4A12	0
ENSG00000071205	ARHGAP10	472.797	-0.063099	0.115567	-0.545996	0.585069	0.977163
ENSG00000071242	RPS6KA2	13.9867	-0.447705	0.756794	-0.591581	0.554131	0.973452
ENSG00000071243	ING3	179.34	-0.0163115	0.190775	-0.0855011	0.931863	0.996509
ENSG00000071246	VASH1	372.211	-0.0646106	0.132104	-0.489088	0.624779	0.978787
ENSG00000071282	LMCD1	1527.97	-0.0623997	0.0740682	-0.842462	0.399529	0.936989
ENSG00000071462	BUD23	3461.26	0.0237377	0.0575521	0.412455	0.680006	0.978787
ENSG00000071537	SEL1L	4463.79	-0.0707472	0.0801589	-0.882587	0.377459	0.92839
ENSG00000071539	TRIP13	2685.67	0.00685084	0.0673718	0.101687	0.919005	0.996317
ENSG00000071553	ATP6AP1	5312.5	0.117602	0.0555052	2.11876	0.0341108	0.448096
ENSG00000071564	TCF3	1955.03	-0.0728637	0.0938197	-0.776635	0.437374	0.955041
ENSG00000071575	TRIB2	10.6602	0.261325	0.770976	0.338953	0.734645	0.980928
ENSG00000071626	DAZAP1	3819.42	-0.126494	0.0566235	-2.23395	0.0254865	0.383576
ENSG00000071655	MBD3	2363.74	-0.0351015	0.0759812	-0.461976	0.644099	0.978787
ENSG00000071677	PRLH	0
ENSG00000071794	HLTF	2371.92	-0.128705	0.0807404	-1.59405	0.110924	0.709409
ENSG00000071859	FAM50A	2792.84	-0.00358406	0.0691139	-0.0518574	0.958642	0.998849
ENSG00000071889	FAM3A	1149.31	-0.0476973	0.100033	-0.476814	0.633494	0.978787
ENSG00000071894	CPSF1	2738.55	0.020278	0.0877496	0.231089	0.817245	0.988254
ENSG00000071909	MYO3B	1.23079	-1.15326	2.01248	-0.573053	0.566609
ENSG00000071967	CYBRD1	2609.1	-0.0626861	0.0682241	-0.918826	0.358186	0.923092
ENSG00000071991	CDH19	24.8422	0.306123	0.578432	0.529229	0.596647	0.978787
ENSG00000071994	PDCD2	1355.14	-0.00669142	0.0741893	-0.0901938	0.928133	0.996509
ENSG00000072041	SLC6A15	188.378	-0.205494	0.215419	-0.953931	0.340118	0.919531
ENSG00000072042	RDH11	4941.58	0.0561955	0.057672	0.974398	0.329859	0.917806
ENSG00000072062	PRKACA	1703.18	0.0282789	0.0850407	0.332533	0.739487	0.981271
ENSG00000072071	ADGRL1	271.533	-0.0540338	0.169916	-0.318003	0.750483	0.982574
ENSG00000072080	SPP2	8.72947	-0.581071	0.804803	-0.722004	0.470292	0.956485
ENSG00000072110	ACTN1	18061.9	-0.0238135	0.051173	-0.465352	0.641679	0.978787
ENSG00000072121	ZFYVE26	1069.3	0.118649	0.0938012	1.2649	0.205907	0.837954
ENSG00000072133	RPS6KA6	424.79	-0.47072	0.180173	-2.6126	0.00898573	0.217726
ENSG00000072134	EPN2	1736.28	-0.0905412	0.0834891	-1.08447	0.278158	0.895042
ENSG00000072135	PTPN18	1042.06	0.115743	0.0769491	1.50415	0.132542	0.753067
ENSG00000072163	LIMS2	33.7994	-0.0184039	0.397096	-0.0463463	0.963034	0.998849
ENSG00000072182	ASIC4	0.177384	0.786103	4.08047	0.19265	0.847233
ENSG00000072195	SPEG	36.607	0.0595836	0.546308	0.109066	0.91315	0.995994
ENSG00000072201	LNX1	2.0017	0.825912	1.79321	0.460576	0.645102
ENSG00000072210	ALDH3A2	9981.36	0.012522	0.0524517	0.238734	0.811312	0.988254
ENSG00000072274	TFRC	16199.3	-0.0701996	0.0648898	-1.08183	0.279329	0.895042
ENSG00000072310	SREBF1	7651.85	0.26657	0.0591817	4.50426	6.6606e-06	0.000647778
ENSG00000072315	TRPC5	0
ENSG00000072364	AFF4	3949.82	0.00920813	0.107798	0.0854201	0.931927	0.996509
ENSG00000072401	UBE2D1	824.836	-0.0652994	0.111683	-0.584685	0.55876	0.973952
ENSG00000072415	MPP5	2057.02	-0.119561	0.062291	-1.91939	0.0549354	0.543236
ENSG00000072422	RHOBTB1	678.994	0.18792	0.109544	1.71547	0.0862588	0.646345
ENSG00000072501	SMC1A	9287.06	-0.090871	0.0918191	-0.989674	0.322333	0.915071
ENSG00000072506	HSD17B10	3379.39	-0.0565707	0.0661212	-0.855562	0.39224	0.934985
ENSG00000072518	MARK2	1853.45	-0.00289274	0.0716932	-0.0403489	0.967815	0.998859
ENSG00000072571	HMMR	1959.04	-0.221196	0.0909472	-2.43213	0.0150102	0.298513
ENSG00000072609	CHFR	834.227	0.0516668	0.117666	0.439096	0.660592	0.978787
ENSG00000072657	TRHDE	8.34269	-0.764302	1.36071	-0.561693	0.574325	0.977163
ENSG00000072682	P4HA2	1620.6	0.00310558	0.0713321	0.0435369	0.965274	0.998849
ENSG00000072694	FCGR2B	0.141037	0.786103	4.08047	0.19265	0.847233
ENSG00000072736	NFATC3	1539.19	0.105517	0.0884814	1.19254	0.23305	0.855611
ENSG00000072756	TRNT1	1102.25	0.0398473	0.0891991	0.446723	0.655075	0.978787
ENSG00000072778	ACADVL	6205.31	0.0597635	0.0523883	1.14078	0.253962	0.873612
ENSG00000072786	STK10	1228.43	0.0754928	0.0904292	0.834828	0.403815	0.939384
ENSG00000072803	FBXW11	2578.54	-0.0745977	0.0597836	-1.2478	0.212106	0.840272
ENSG00000072818	ACAP1	14.9543	-0.491062	0.662642	-0.741067	0.458653	0.956485
ENSG00000072832	CRMP1	89.3982	0.245564	0.253623	0.968226	0.332932	0.918885
ENSG00000072840	EVC	659.736	-0.0508437	0.117957	-0.431037	0.666442	0.978787
ENSG00000072849	DERL2	1900.14	0.0456633	0.0705622	0.647135	0.517545	0.965723
ENSG00000072858	SIDT1	190.145	0.507172	0.180485	2.81005	0.00495339	0.150299
ENSG00000072864	NDE1	472.168	-0.0228645	0.171815	-0.133076	0.894134	0.993466
ENSG00000072952	MRVI1	1.26573	-3.00935	2.19947	-1.36822	0.171244
ENSG00000072954	TMEM38A	64.2063	0.029962	0.292854	0.10231	0.91851	0.996317
ENSG00000072958	AP1M1	2089.47	-0.0396697	0.0717873	-0.5526	0.580537	0.977163
ENSG00000073008	PVR	6690.63	-0.0556339	0.0467891	-1.18904	0.234426	0.856499
ENSG00000073050	XRCC1	1562.17	-0.0444235	0.0682476	-0.650917	0.5151	0.965437
ENSG00000073060	SCARB1	7139.6	0.157919	0.0776337	2.03416	0.0419356	0.48605
ENSG00000073067	CYP2W1	1.35331	0.751782	2.12517	0.353752	0.723525
ENSG00000073111	MCM2	5639.43	0.0134531	0.0538494	0.249828	0.80272	0.988254
ENSG00000073146	MOV10L1	1.46065	-0.132326	1.76376	-0.0750249	0.940195
ENSG00000073150	PANX2	236.521	-0.0813912	0.167819	-0.484994	0.627681	0.978787
ENSG00000073169	SELENOO	391.192	0.00249132	0.13473	0.0184912	0.985247	0.99917
ENSG00000073282	TP63	132.447	-0.0343444	0.212146	-0.161891	0.871392	0.990887
ENSG00000073331	ALPK1	367.608	0.25392	0.131379	1.93273	0.0532689	0.53466
ENSG00000073350	LLGL2	1500.56	0.153367	0.0938369	1.6344	0.102175	0.687037
ENSG00000073417	PDE8A	3372.11	0.00787776	0.0642459	0.122619	0.902409	0.994132
ENSG00000073464	CLCN4	611.653	-0.261223	0.160408	-1.62849	0.103422	0.689659
ENSG00000073536	NLE1	1458.9	-0.0665901	0.0895515	-0.743596	0.457121	0.956485
ENSG00000073578	SDHA	5272.8	0.0274374	0.0644158	0.425941	0.670151	0.978787
ENSG00000073584	SMARCE1	4856.71	-0.00772235	0.0513446	-0.150403	0.880447	0.991963
ENSG00000073598	FNDC8	1.52509	-2.01801	1.88444	-1.07088	0.284223
ENSG00000073605	GSDMB	31.6176	0.262097	0.427622	0.612917	0.539931	0.972302
ENSG00000073614	KDM5A	2333.9	0.0292576	0.126814	0.230712	0.817538	0.988254
ENSG00000073670	ADAM11	215.188	-0.160998	0.169082	-0.952185	0.341003	0.920127
ENSG00000073711	PPP2R3A	213.149	-0.207793	0.166818	-1.24563	0.212901	0.840272
ENSG00000073712	FERMT2	1798.53	-0.04267	0.0702124	-0.607728	0.543368	0.972543
ENSG00000073734	ABCB11	21.9745	0.596631	0.555245	1.07454	0.282582	0.8957
ENSG00000073737	DHRS9	25.9072	0.584702	0.478143	1.22286	0.221382	0.845083
ENSG00000073754	CD5L	0
ENSG00000073756	PTGS2	2783.14	0.281381	0.0919867	3.05893	0.00222132	0.0889914
ENSG00000073792	IGF2BP2	573.99	-0.104612	0.125483	-0.833674	0.404465	0.939384
ENSG00000073803	MAP3K13	574.237	-0.0134161	0.101349	-0.132375	0.894687	0.99369
ENSG00000073849	ST6GAL1	277.75	0.121386	0.165424	0.733791	0.463076	0.956485
ENSG00000073861	TBX21	1.16429	3.45329	2.82876	1.22078	0.22217
ENSG00000073905	VDAC1P1	0.141037	0.786103	4.08047	0.19265	0.847233
ENSG00000073910	FRY	20.0524	-0.99968	0.786308	-1.27136	0.203601	0.834887
ENSG00000073921	PICALM	4727.68	-0.0719302	0.0562086	-1.2797	0.200651	0.829057
ENSG00000073969	NSF	2772.73	0.0653367	0.0658537	0.992149	0.321125	0.915071
ENSG00000074047	GLI2	1175.46	-0.0616994	0.117749	-0.52399	0.600286	0.978787
ENSG00000074054	CLASP1	1949.46	0.0720161	0.100648	0.715526	0.474284	0.9569
ENSG00000074071	MRPS34	3097.23	-0.243372	0.0681381	-3.57175	0.000354603	0.0219325
ENSG00000074181	NOTCH3	892.356	0.195421	0.111636	1.75052	0.0800284	0.626505
ENSG00000074201	CLNS1A	2972.04	-0.0562093	0.0567	-0.991345	0.321517	0.915071
ENSG00000074211	PPP2R2C	2368.52	-0.0758514	0.0694166	-1.0927	0.274526	0.890994
ENSG00000074219	TEAD2	831.45	0.161052	0.109781	1.46703	0.142367	0.766439
ENSG00000074266	EED	952.322	0.0504463	0.0824595	0.611771	0.540689	0.972543
ENSG00000074276	CDHR2	0.69457	-1.98421	3.34147	-0.593812	0.552638
ENSG00000074317	SNCB	19.8964	0.326095	0.518072	0.62944	0.529061	0.969637
ENSG00000074319	TSG101	2164.98	0.223141	0.083424	2.67478	0.00747778	0.19492
ENSG00000074356	NCBP3	2230.31	0.0595845	0.0852521	0.698921	0.484601	0.95981
ENSG00000074370	ATP2A3	445.456	0.0590026	0.141645	0.416553	0.677006	0.978787
ENSG00000074410	CA12	33094.5	0.120467	0.0528141	2.28097	0.0225505	0.36101
ENSG00000074416	MGLL	3816.56	0.114628	0.0539793	2.12355	0.0337075	0.445913
ENSG00000074527	NTN4	5849.02	0.0459257	0.0486956	0.94312	0.34562	0.920918
ENSG00000074582	BCS1L	942.202	0.0338338	0.0847676	0.399137	0.689793	0.978787
ENSG00000074590	NUAK1	1400.75	0.00637978	0.0800632	0.0796844	0.936488	0.997272
ENSG00000074603	DPP8	1670.8	-0.0562499	0.0929595	-0.605101	0.545112	0.973032
ENSG00000074621	SLC24A1	296.052	0.158203	0.189407	0.835253	0.403575	0.939384
ENSG00000074657	ZNF532	1872.31	0.0259539	0.118189	0.219597	0.826185	0.988254
ENSG00000074660	SCARF1	0.564147	2.5405	3.97981	0.638348	0.523247
ENSG00000074695	LMAN1	4961.57	-0.0292103	0.0612672	-0.47677	0.633526	0.978787
ENSG00000074696	HACD3	11819.5	-0.0136649	0.0442118	-0.309078	0.757263	0.984396
ENSG00000074706	IPCEF1	0
ENSG00000074755	ZZEF1	2488.89	0.0372161	0.105972	0.351188	0.725448	0.979435
ENSG00000074771	NOX3	0
ENSG00000074800	ENO1	104603	0.0558335	0.0621958	0.897705	0.369343	0.925951
ENSG00000074803	SLC12A1	0.328482	-1.93915	4.04658	-0.479208	0.631791
ENSG00000074842	MYDGF	1879.21	-0.0188712	0.0747166	-0.25257	0.800601	0.988254
ENSG00000074855	ANO8	180.28	-0.152267	0.180849	-0.841953	0.399814	0.936989
ENSG00000074935	TUBE1	213.979	0.000463854	0.16388	0.00283045	0.997742	0.99917
ENSG00000074964	ARHGEF10L	483.512	0.0263149	0.115541	0.227754	0.819838	0.988254
ENSG00000074966	TXK	10.035	-0.191986	0.76877	-0.249731	0.802795	0.988254
ENSG00000075035	WSCD2	0
ENSG00000075043	KCNQ2	2.54353	0.627582	1.67816	0.373972	0.708425
ENSG00000075073	TACR2	6.84426	-0.306828	0.875969	-0.350273	0.726134
ENSG00000075089	ACTR6	891.56	-0.076187	0.0907788	-0.839261	0.401323	0.938395
ENSG00000075131	TIPIN	1008.39	-0.00654649	0.0983151	-0.0665867	0.946911	0.998156
ENSG00000075142	SRI	1564.63	0.0100259	0.0939612	0.106703	0.915025	0.996205
ENSG00000075151	EIF4G3	2810.54	0.0229372	0.0753905	0.304245	0.760941	0.984508
ENSG00000075188	NUP37	1577.51	0.0224467	0.077454	0.289807	0.771964	0.985447
ENSG00000075213	SEMA3A	1620.07	0.0450495	0.0855929	0.526323	0.598664	0.978787
ENSG00000075218	GTSE1	1402.61	-0.159449	0.0698255	-2.28354	0.0223987	0.360424
ENSG00000075223	SEMA3C	5543.69	-0.125535	0.0804494	-1.56042	0.118661	0.726285
ENSG00000075234	TTC38	496.51	0.124862	0.131299	0.950968	0.341621	0.920582
ENSG00000075239	ACAT1	2547.3	-0.0369606	0.0780456	-0.473577	0.635802	0.978787
[truncated: 33,805 more rows]

## Sheet: NINL-KO-induced-vs-uninduced
Ensembl Gene ID	Gene symbol	BaseMean	log2(FC)	StdErr	Wald-Stats	P-value	P-adj
[truncated: 35,100 more rows]

[truncated: 1 more sheets: NIN-KO-induced-vs-uninduced]
