# Supplementary material for: Antiviral function and viral antagonism of the rapidly evolving dynein activating adaptor NINL
Source: eLife. 2022 Oct 12;11:e81606. doi: 10.7554/eLife.81606 (PMC9651953; doi:10.7554/eLife.81606)
Supplement: Supplementary file 5. — Spreadsheet that details the generation or sourcing of all plasmids used throughout this study. [file elife-81606-supp5.xlsx]

## Sheet: Sheet1
Supplemental File 5. Primers and gBlocks used
Experiment	Plasmid Name	Reference	Notes	Forward Primer 5' to 3'	Reverse Primer 5' to 3	gBlock 5' to 3'
NINL cleavage Assays
	pDL2118-mCherry-P2A-3xFlag-NINL-(Q231/827/1032R)-Myc	This Study	Sequential Q5 mutagenesis with primers that encode Q to R switch at each uncleavable site	See E7, E8, E9	See F7, F8, F9
	pDL2118-mCherry-P2A-3xFlag-NINL(iso1)-Myc	This Study	Subcloned from pcDNA5/FRT/TO-BioID-NINL-3xFLAG (Redwine and Desantis et al., 2017) into pDL2118-mCherry-P2A-3xFLAG-MCS-Myc	CGATTACAAGGATGACGATGACAAGCTTGCTATGGACGAGGAGGAGAATCATTATGTTTC	CCTCTTCTGAGATGAGTTTTTGTTCGCTAGCAACACTCAACGCGGCAGGAGCAATTCGAC
	pDL2118-mCherry-P2A-3xFlag-NINL(iso2 Q231R)-Myc	This Study	Q5 mutagenesis on pDL2118-mCherry-P2A-3xFlag-NINL(iso2)-Myc with primers that encode CAA->AGA point mutation to generate uncleavable site at aa231 (Q231R)	See E8	See F8
	pDL2118-mCherry-P2A-3xFlag-NINL(iso2)-Myc	This Study	Q5 mutagenesis on pDL2118-mCherry-P2A-3xFlag-NINL(iso1)-Myc with primers that exclude exon 17	CTGGAGTTCCATAGGTTG	CCTTATCTGCTGCAAATG
	pDL2118-mCherry-P2A-3xFlag-NINL(Q231R)-Myc	This Study	Q5 mutagenesis on pDL2118-mCherry-P2A-3xFlag-NINL(iso1)-Myc with primers that encode CAA->AGA point mutation to generate uncleavable site at aa231 (Q231R)	GTGTCAATCTGTCGGCTTGAGAGGACTCGAGAAAGAGGAA	TTCCTCTTTCTCGAGTCCTCTCAAGCCGACAGATTGACAC
	pDL2118-mCherry-P2A-3xFlag-NINL(Q827R)-Myc	This Study	Q5 mutagenesis on pDL2118-mCherry-P2A-3xFlag-NINL(iso1)-Myc with primers that encode CAA->AGA point mutation to generate uncleavable site at aa827 (Q827R)	CCCTTGAAGCCGAGATGAGAGCTCTTCCTAAGGACG	CGTCCTTAGGAAGAGCTCTCATCTCGGCTTCAAGGG
	pDL2118mCherry-P2A-3xFlag-NINL(Q1032R)-Myc	This Study	Q5 mutagenesis on pDL2118-mCherry-P2A-3xFlag-NINL(iso1)-Myc with primers that encode CAG->AGA point mutation to generate uncleavable site at aa1032 (Q1032R)	GCTCGCTGATCCACGGGGATCTTGGCAGG	CCTGCCAAGATCCCCGTGGATCAGCGAGC
	pQCXIP-HA-CVB3(Nancy Strain)-3Cpro	eLife 2021;10:e60609	Refer to eLife 2021;10:e60609 for details of plasmid generation
	pQCXIP-HA-CVB3(Nancy Strain)-3Cpro(C147A)	eLife 2021;10:e60609	Refer to eLife 2021;10:e60609 for details of plasmid generation
	pQCXIP-HA-EMCV-3Cpro	eLife 2021;10:e60609	Refer to eLife 2021;10:e60609 for details of plasmid generation
	pQCXIP-HA-EV68-3Cpro	eLife 2021;10:e60609	Refer to eLife 2021;10:e60609 for details of plasmid generation
	pQCXIP-HA-EV71-3Cpro	eLife 2021;10:e60609	Refer to eLife 2021;10:e60609 for details of plasmid generation
	pQCXIP-HA-HepA-3Cpro	eLife 2021;10:e60609	Refer to eLife 2021;10:e60609 for details of plasmid generation
	pQCXIP-HA-HRVA-3Cpro	eLife 2021;10:e60609	Refer to eLife 2021;10:e60609 for details of plasmid generation
	pQCXIP-HA-NL63-3CLpro	This Study	gBlock cloned into pQCXIP. Encodes the coding sequence for NL63-CoV 3CLpro, adds nine amino acids from nsp4 upstream of 3CLpro and nine amino acids from nsp6 downstream of 3CLpro	See gBlock Column	See gBlock Column	ACCATCTCATATAATTCTACGCTTCAAAGTGGGCTCAAGAAAATGGCTCAGCCATCTGGGTGCGTGGAACGCTGCGTTGTGAGGGTGTGTTATGGTTCCACCGTTCTCAACGGCGTTTGGCTTGGCGATACGGTAACCTGTCCTCGCCATGTGATAGCTCCTTCTACGACAGTGTTGATCGACTATGATCATGCTTATAGCACAATGAGACTCCACAATTTCAGTGTATCTCATAATGGCGTTTTTCTTGGGGTTGTAGGGGTGACTATGCACGGTTCAGTCCTGAGGATTAAAGTTTCCCAGTCTAACGTTCACACGCCGAAGCACGTTTTCAAGACCCTCAAACCTGGTGACAGCTTCAATATATTGGCCTGTTACGAAGGGATAGCATCTGGAGTC…
	pQCXIP-HA-Parecho-3Cpro	eLife 2021;10:e60609	Refer to eLife 2021;10:e60609 for details of plasmid generation
	pQCXIP-HA-PV1-3Cpro	eLife 2021;10:e60609	Refer to eLife 2021;10:e60609 for details of plasmid generation
	pQCXIP-HA-Sali-3Cpro	eLife 2021;10:e60609	Refer to eLife 2021;10:e60609 for details of plasmid generation
	pQCXIP-HA-SARS1-3CLpro	This Study	gBlock cloned into pQCXIP. Encodes the coding sequence for SARS-CoV-1 3CL pro.	See gBlock Column	See gBlock Column	TCAGGCTTTCGGAAGATGGCGTTCCCCTCAGGGAAAGTTGAGGGGTGCATGGTGCAGGTCACATGCGGGACAACAACTTTGAACGGCCTCTGGCTTGACGACACAGTCTATTGCCCCCGACATGTGATCTGCACGGCGGAGGACATGCTGAATCCCAATTACGAGGATCTCCTCATCCGGAAATCTAACCATTCTTTTCTCGTCCAAGCCGGGAACGTGCAGCTTAGGGTAATCGGACATTCTATGCAGAACTGTCTGCTGAGACTGAAAGTAGACACATCTAACCCCAAAACACCGAAGTATAAATTCGTGCGGATTCAGCCAGGACAAACGTTCAGCGTCCTGGCTTGCTACAACGGATCACCCAGCGGCGTCTACCAATGCGCGATGCGGCCTAAC…
	pQCXIP-HA-SARS2-3CLpro	This Study	gBlock cloned into pQCXIP. Encodes the coding sequence for SARS-CoV-2 3CLpro, adds nine amino acids from nsp4 upstream of 3CLpro and nine amino acids from nsp6 downstream of 3CLpro	See gBlock Column	See gBlock Column	ACTTCAATCACGAGCGCGGTCCTTCAGTCCGGTTTTCGCAAGATGGCTTTCCCTTCCGGAAAAGTAGAGGGCTGCATGGTTCAGGTTACCTGTGGAACAACGACTCTTAACGGGCTGTGGTTGGACGATGTAGTTTACTGTCCTCGGCATGTCATTTGCACTAGCGAAGATATGCTCAATCCCAACTACGAAGACCTCTTGATACGAAAGAGCAACCACAATTTTCTCGTACAGGCAGGCAACGTGCAACTGCGAGTCATCGGGCATTCAATGCAGAACTGCGTCCTCAAACTTAAAGTGGATACCGCAAACCCTAAAACGCCTAAGTATAAATTCGTTAGGATTCAACCAGGCCAAACGTTCAGCGTACTGGCCTGCTATAACGGAAGCCCAAGCGGG…
	pQCXIP-HA-SARS2-3CLpro(C145A)	This Study	Mutageneis on pQCXIP-HA-SARS2-3CLpro	GGAAGCTTTTTGAATGGGAGTgcTGGTTCTGTGGGATTCAACATAGATTATGATTGTG	GTTGAATCCCACAGAACCAgcACTCCCATTCAAAAAGCTTCCTTTTATTGTGAAATTAGG
CRISPR
	pSPCas9(BB)-2A-Puro-V2.0-NINLexon2-gRNA	This Study	Oligos encoding guide RNA targeting human NINL exon 2 were annealed and ligated into BbsI digested pSPCas9(BB)-2A-Puro-V2.0	CACCGCGGAAACGACC ATTTCGCC	AAACGGCGAAATGGTCGTTTCCGC
	pSPCas9(BB)-2A-Puro-V2.0-NINLexon6-gRNA	This Study	Oligos encoding guide RNA targeting human NINL exon 5 were annealed and ligated into BbsI digested pSPCas9(BB)-2A-Puro-V2.0	CACCGCTTGCTCGGTTTAACCCGAG	AAACCTCGGGTTAAACCGAGCAAGC
	pSPCas9(BB)-2A-Puro-V2.0-NINexon3-gRNA	This Study	Oligos encoding guide RNA targeting human NIN exon 3 were annealed and ligated into BbsI digested pSPCas9(BB)-2A-Puro-V2.0	CACCGTTTTGACACGACGGGCACA	AAACTGTGCCCGTCGTGTCAAAAC
	pSPCas9(BB)-2A-Puro-V2.0-NINexon5-gRNA	This Study	Oligos encoding guide RNA targeting human NIN exon 5 were annealed and ligated into BbsI digested pSPCas9(BB)-2A-Puro-V2.0	CACCGTGGGAAGCGTTACGGACGA	AAACTCGTCCGTAACGCTTCCCAC
	pSpCas9(BB)-2A-Puro (PX459) V2.0	Nat Protoc 2013; 10.1038/nprot.2013.143	Gift from Feng Zhang
Peroxisome Recruitment
	pcDNA3.1(+)-3xFlag-Halo-NINL-Myc-FRB	This Study	gBlock cloned into into pcDNA3.1(+)	See gBlock Column	See gBlock Column	GCTTGGTACCGAGCTCGGATCCACTAGTCCAGTGTGGTGGATGGACTACAAAGACCATGACGGTGATTATAAAGATCATGACATCGATTACAAGGATGACGATGACAAGcttgctATGGCCGAAATCGGCACCGGCTTCCCGTTTGACCCGCATTACGTTGAAGTTCTGGGCGAACGCATGCACTACGTTGACGTGGGTCCGCGTGACGGCACTCCGGTGCTGTTCCTGCACGGCAATCCGACCTCTTCCTATGTTTGGCGCAATATCATCCCGCATGTTGCTCCGACCCACCGTTGTATTGCACCGGACCTGATCGGTATGGGCAAATCTGACAAACCGGACCTGGGCTATTTCTTCGACGATCATGTGCGTTTCATGGACGCTTTCATCGAGGCCCT…
	pcDNA3.1(+)-3xFlag-Halo_NINL(1-1062)-Myc-FRB	This Study	Q5 mutagenesis on pcDNA3.1(+)-3xFlag-Halo-NINL-Myc-FRB with primers that truncate NINL at aa1062	GCTAGCGAACAAAAACTC	GAGCTTCGTTTCCATGTC
	pcDNA3.1(+)-3xFlag-Halo-NINL(1-1062)(Q231/827/1032R)-Myc-FRB	This Study	Sequential Q5 mutagenesis with primers that encode Q to R switch at each uncleavable site	See E7, E8, E9	See F7, F8, F9
	pcDNA3.1(+)-Pex3-Emerald-FKBP	Nat Cell Biol.; 10.1038/s41556-020-0506-z	Subcloned frompcDNA5-PEX3-Emerald-FKBP (Htet and Gillies et al., 2020) into pcDNA3.1(+)	GCTTGGTACCGAGCTCGGATCCACTAGTCCAGTGTGGTGGATGCTGAGGTCTGTATGGAATTTTCT	AGGCACAGTCGAGGCTGATCAGCGGGTTTAAACGGGCCCTTTAAGTTTCCAGTTTTAGAAGCTCCACAT
Virus plasmids and virus stocks
	CVB3 (strain Nancy) infectious clone plasmid	Proc Natl Acad Sci 1985; 10.1073/pnas.82.14.4818	Gift from Dr. Julie Pfeiffer
	EMCV (strain Mengo) infectious clone plasmid	J Virol. 1989; 10.1128/JVI.63.4.1822-1826.1989	Gift from Dr. Julie Pfeiffer
	T7 plasmid	J Virol. 2020; 10.1128/JVI.01590-19	Gift from Dr. Julie Pfeiffer
	SinV (strain Toto1101) infectious clone plasmid	J. Virol. 2002; 10.1128/jvi.76.22.11254-11264.2002	From Dr. Charles Rice, Rockefeller University
	VSV-GFP (strain Indiana)	J. Virol. 1999; 10.1128/JVI.73.8.6937-6945.1999	From Dr. John Rose, Yale University
	Vaccinia virus (strain Western Reserve)	https://www.ncbi.nlm.nih.gov/nucleotide/NC_006998	From Dr. Richard Condit, University of Florida
	Vaccinia virus (strain Western Reserve), J3 K175R mutant	Virology 2002; 10.1006/viro.2002.1538	From Dr. Richard Condit, University of Florida
