# Supplementary material for: Antiviral function and viral antagonism of the rapidly evolving dynein activating adaptor NINL
Source: eLife. 2022 Oct 12;11:e81606. doi: 10.7554/eLife.81606 (PMC9651953; doi:10.7554/eLife.81606)
Supplement: Supplementary file 6. — Spreadsheet that details each antibody name, manufacturer, catalog number, and dilutions used. [file elife-81606-supp6.xlsx]

## Sheet: Sheet1
Supplementary File 6: Antibody Information
Antibody Name	Manufacturer	Identifiers	Western Blot Dilution	IF Dilution
Primary
Alpha Tubulin Mouse Monoclonal	Millipore Sigma	T6199	n/a	1:300
Beta Actin Mouse Monoclonal	ThermoFisher Scientific	MA5-15739	1:1,000	n/a
FLAG-Tag Clone M2 Mouse monoclonal HRP conjugated	Sigma Aldrich	A8592	1:2,000	n/a
GAPDH rabbit monoclonal	Cell Signaling	2118	1:1,000	n/a
HA-Tag Rat monoclonal	Roche	11867423001	1:1,000	n/a
IFIT3/P60 Mouse polyclonal	Abcam	ab76818	1:1,000	n/a
ISG15	Cell Signaling Technology	2743	1:1,000	n/a
Mx1(D3W7I) Rabbit monoclonal	Cell Signaling Technology	37849	1:1,000	n/a
Myc-Tag Rabbit monoclonal	Cell Signaling Technology	2278	1:,1000	n/a
NIN rabbit polyclonal	Lifespan Biosciences	LS-C668760	1:1,000	n/a
NINL rabbit polyclonal	ThermoFisher Scientific	PA5-51438	1:1,000	n/a
Oas1(D1W3A) Rabbit monoclonal	Cell Signaling Technology	14498	1:1,000	n/a
Pericentrin Rabbit Polyclonal	Abcam	ab4448	n/a	1:500
Phospho Stat1 (Tyr701)(58D6) rabbit monoclonal	Cell Signaling Technology	9167	1:1,000	n/a
Phospho Stat2 (Tyr690)(D3P2P) rabbit monoclonal	Cell Signaling Technology	88410	1:1,000	n/a
Stat1(D1K9Y) Rabbit monoclonal	Cell Signaling Technology	14994	1:1,000	n/a
Stat2(D9J7L) Rabbit monoclonal	Cell Signaling Technology	72604	1:1,000	n/a
Secondary
Goat anti-Mouse IgG (H+L) HRP conjugated	Biorad	170–6516	1:10,000	n/a
Goat anti-Mouse IgG (H+L) Alexa Fluor 647 conjugated	Thermo Fisher Scientific	A21235	n/a	1:1,000
Goat anti-Mouse IgG (H+L) HRP conjugated	Cell Signaling Technology	7076	1:3,000	n/a
Goat anti-Rabbit IgG (H+L) Alexa Fluor 568 conjugated	Thermo Fisher Scientific	A11011	n/a	1:1,000
Goat anti-Rabbit IgG (H+L) Alexa Fluor 647 conjugated	Thermo Fisher Scientific	A21247	n/a	1:1,000
Goat anti-Rabbit IgG (H+L) HRP conjugated	Biorad	170–6515	1:10,000	n/a
Goat anti-Rabbit IgG (H+L) HRP conjugated	Cell Signaling Technology	7074	1:3,000	n/a
Goat anti-Rat IgG (H+L) HRP conjugated	Thermo Fisher Scientific	31470	1:10,000	n/a
